# Supplementary material for: Potent Inhibition of Nicotinamide N-Methyltransferase by Alkene-Linked Bisubstrate Mimics Bearing Electron Deficient Aromatics
Source: PubMed Central journal article supplement — J Med Chem. 2021 Aug 23;64(17):12938–63. doi: 10.1021/acs.jmedchem.1c01094 (PMC8436214; doi:10.1021/acs.jmedchem.1c01094), 2021-08-23

Supporting Information for:

# Potent inhibition of nicotinamide N-methyltransferase by alkene-linked bisubstrate mimics bearing electron deficient aromatics

Yongzhi Gao,<sup>a,‡</sup> Matthijs J. van Haren,<sup>a,‡</sup> Ned Buijs,<sup>a</sup> Paolo Innocenti,<sup>a</sup> Yurui Zhang,<sup>a</sup> Davide Sartini,<sup>b</sup> Roberto Campagna,<sup>b</sup> Monica Emanuelli,<sup>b</sup> Richard B. Parsons,<sup>c</sup> Willem Jespers,<sup>d,e</sup> Hugo Gutiérrez-de-Terán,<sup>e</sup> Gerard J. P. van Westen,<sup>d</sup> Nathaniel I. Martin<sup>a,\*</sup>

<sup>‡</sup>*These authors contributed equally*

<sup>a</sup>*Biological Chemistry Group, Institute of Biology Leiden, Leiden University, Sylviusweg 72, 2333 BE Leiden, The Netherlands;* <sup>b</sup>*Department of Clinical Sciences, Università Politecnica delle Marche, Via Ranieri 65, 60131, Ancona, Italy;* <sup>c</sup>*Institute of Pharmaceutical Science, King's College London, London SE1 9NH, United Kingdom;* <sup>d</sup>*Drug Discovery and Safety, Leiden Academic Center for Drug Research, Einsteinweg 55, 2333 CC, Leiden, The Netherlands;* <sup>e</sup>*Department of Cell and Molecular Biology, Uppsala University, Uppsala 75124, Sweden*

\*E-mail: [n.i.martin@biology.leidenuniv.nl](mailto:n.i.martin@biology.leidenuniv.nl)

## Table of Contents

|                                                         |            |
|---------------------------------------------------------|------------|
| <b>IC<sub>50</sub> curves</b> .....                     | <b>S2</b>  |
| <b>Comparative inhibition data</b> .....                | <b>S6</b>  |
| <b>Isothermal Titration Calorimetry</b> .....           | <b>S7</b>  |
| <b>Selectivity studies</b> .....                        | <b>S8</b>  |
| <b>Docking and FEP simulation of compound 17v</b> ..... | <b>S10</b> |
| <b>Cell based data</b> .....                            | <b>S11</b> |
| <b>PAMPA assay</b> .....                                | <b>S12</b> |
| <b>HPLC traces of lead compounds</b> .....              | <b>S13</b> |
| <b>NMR data</b> .....                                   | <b>S15</b> |

## IC<sub>50</sub> curves

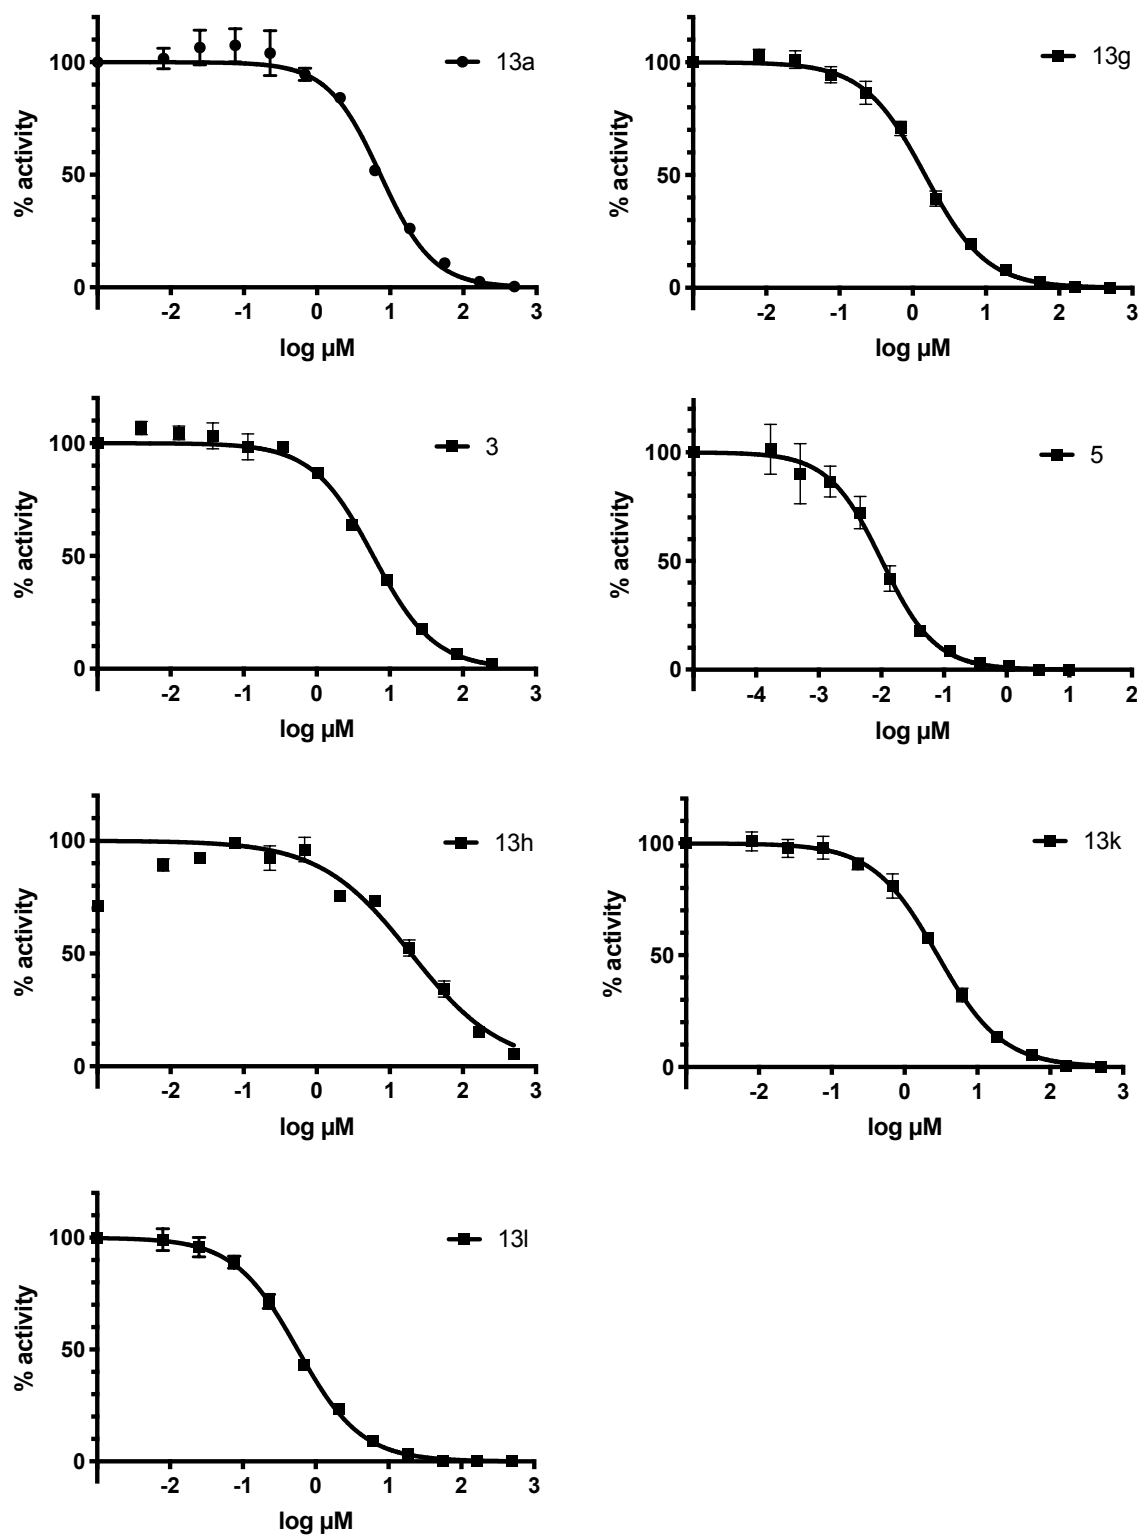

Figure S1. IC<sub>50</sub> curves of reference compounds **3** and **5** and bicyclic aromatic compounds **13a-l**

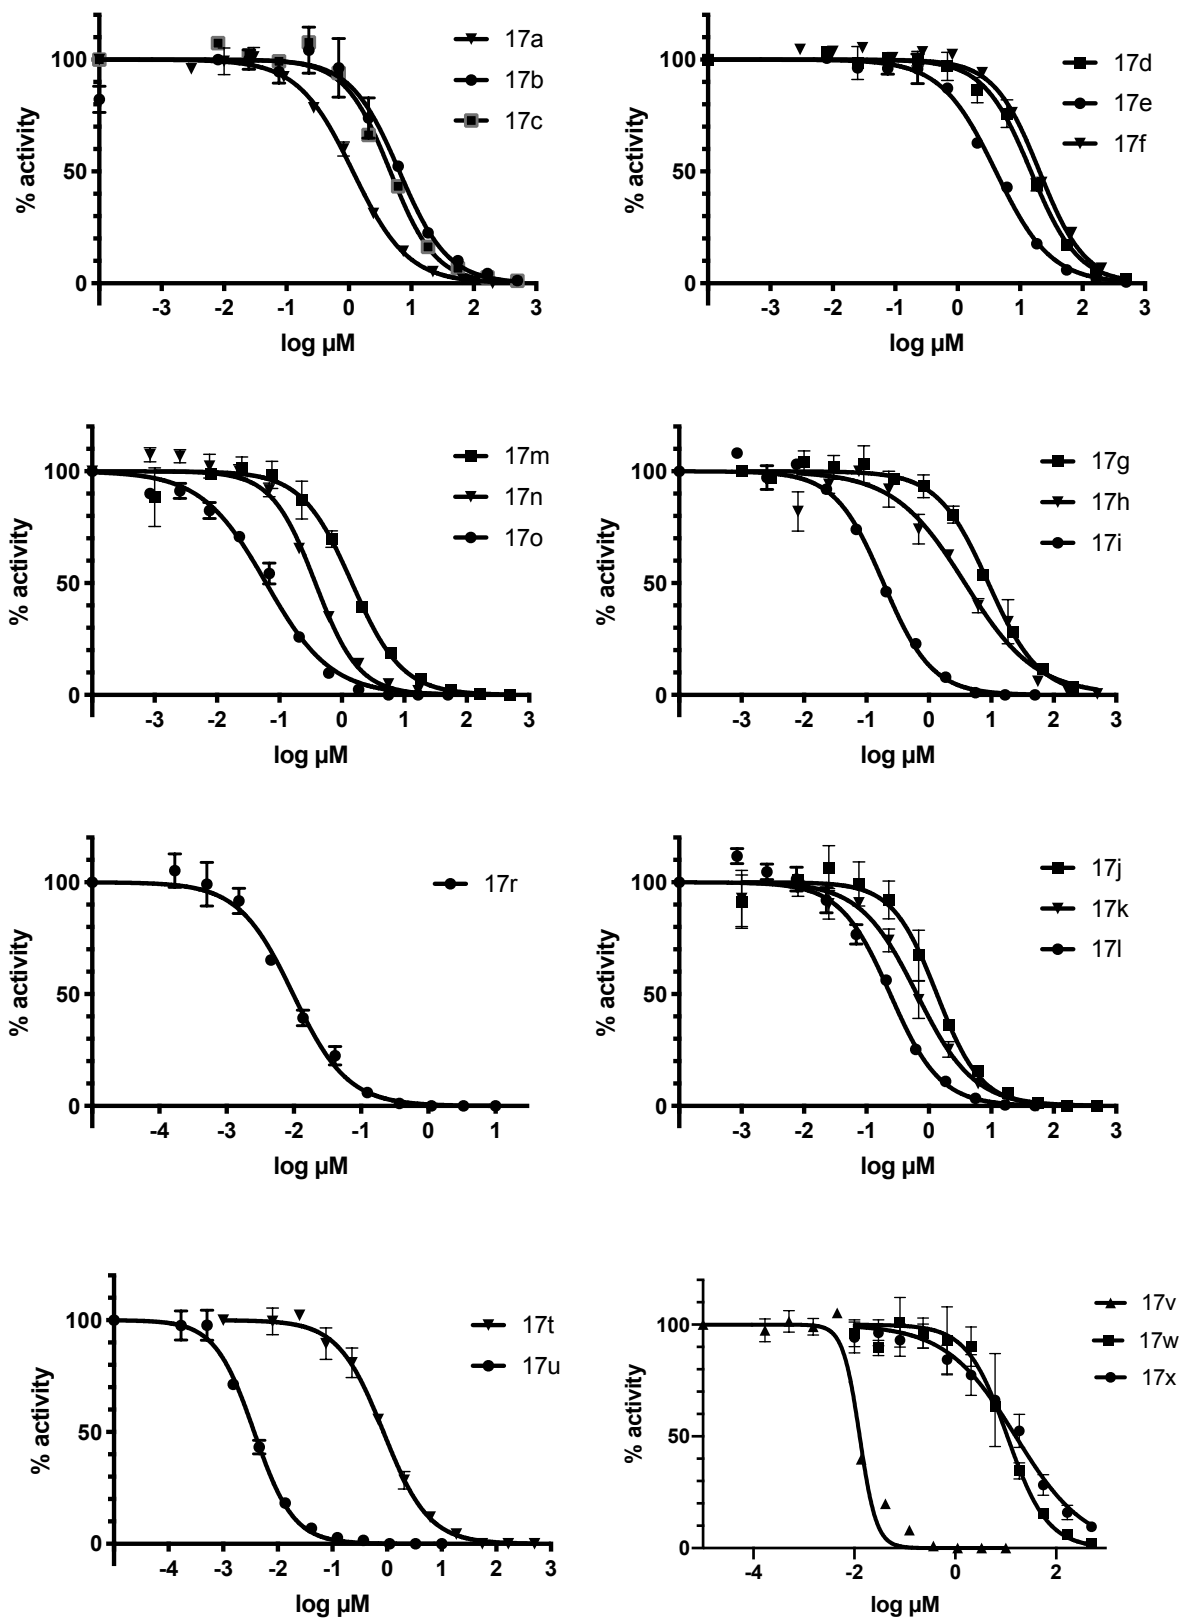

Figure S2. IC<sub>50</sub> curves of alkenyl linked compounds 17a-x.

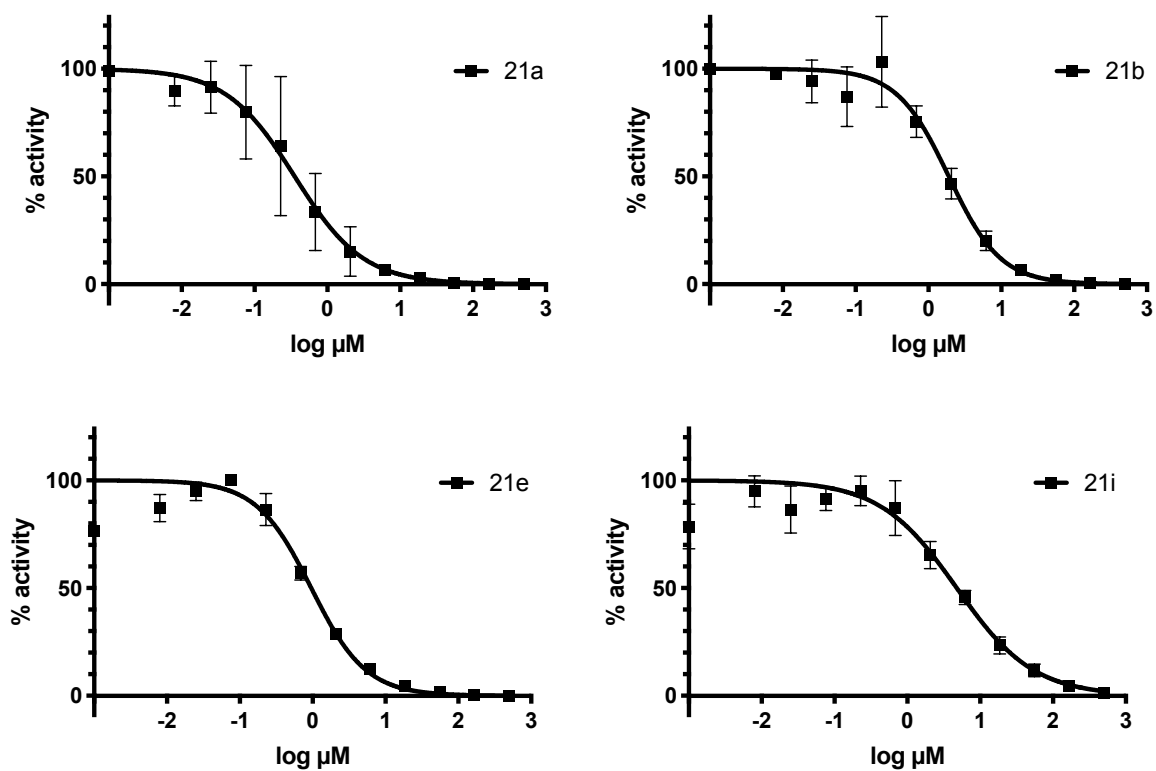

**Figure S3.** IC<sub>50</sub> curves of compounds **21a**, **21b**, **21e** and **21i** bearing different substitutions replacing the amino acid group



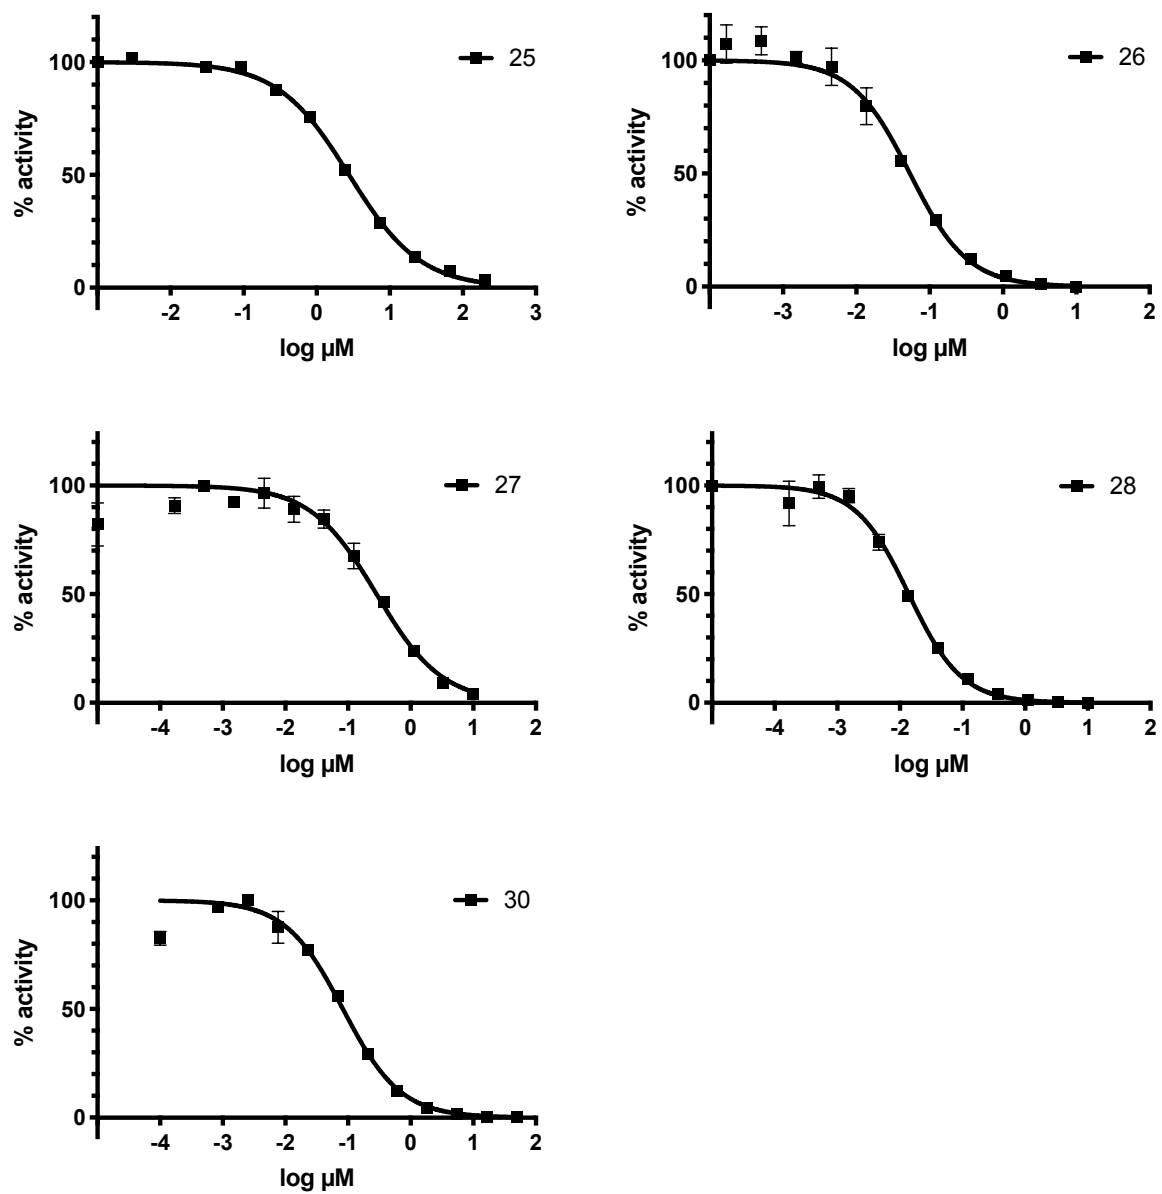

**Figure S4.** IC<sub>50</sub> curves for compounds 25-28 and 30, with varying linkers to either a *para*-cyano or *meta*-amide substituted phenyl group.

## Comparative inhibition data

**Table S1.** IC<sub>50</sub> values for para-cyano compounds **17u** and **28** and meta-amide compounds **17v** and **5** in the presence of SAM at its K<sub>M</sub> value of 8.5 μM or 10 times its K<sub>M</sub> value (85 μM)

| Compound   | substitution       | linker    | IC <sub>50</sub> in nM with s.e.m. |                |
|------------|--------------------|-----------|------------------------------------|----------------|
|            |                    |           | 8.5 μM SAM                         | 85 μM SAM      |
| <b>17u</b> | <i>para</i> -CN    | propenyl  | 3.69 ± 0.17                        | 16.00 ± 1.48   |
| <b>28</b>  | <i>para</i> -CN    | propargyl | 69.29 ± 4.42                       | 258.25 ± 26.21 |
| <b>17v</b> | <i>meta</i> -amide | propenyl  | 12.76 ± 0.78                       | 39.53 ± 4.52   |
| <b>5</b>   | <i>meta</i> -amide | propargyl | 10.23 ± 0.90                       | 21.66 ± 1.61   |

**Table S2.** Apparent K<sub>i</sub> values for para-cyano compounds **17u** and **28** and meta-amide compounds **17v** and **5** in the presence of SAM at its K<sub>M</sub> value of 8.5 μM or 10 times its K<sub>M</sub> value (85 μM) obtained using Morrison's equation for tight binding inhibitors

| Compound   | substitution       | linker    | K <sub>i</sub> <sub>app</sub> in nM with s.e.m. |              |
|------------|--------------------|-----------|-------------------------------------------------|--------------|
|            |                    |           | 8.5 μM SAM                                      | 85 μM SAM    |
| <b>17u</b> | <i>para</i> -CN    | propenyl  | 1.70 ± 0.12                                     | 1.49 ± 0.22  |
| <b>28</b>  | <i>para</i> -CN    | propargyl | 34.90 ± 2.58                                    | 35.38 ± 0.96 |
| <b>17v</b> | <i>meta</i> -amide | propenyl  | 6.93 ± 1.15                                     | 5.23 ± 4.52  |
| <b>5</b>   | <i>meta</i> -amide | propargyl | 5.11 ± 0.44                                     | 2.48 ± 0.32  |

## Isothermal Titration Calorimetry

Thermodynamic parameters of the three independent experiments are reported in Table S3. Thermograms of the measurements are presented in Figure S5.

**Table S3.** Thermodynamic parameters for the three independent titrations of compound **17u** to hNNMT

| replicate      | n                                   | $K_D$<br>(nM)                      | $\Delta H$<br>(kcal/mol)           | $\Delta G$<br>(kcal/mol) | $-T\Delta S$<br>(kcal/mol) |
|----------------|-------------------------------------|------------------------------------|------------------------------------|--------------------------|----------------------------|
| 1              | $0.895 \pm 0.008$                   | $21.60 \pm 6.94$                   | $-5.56 \pm 0.12$                   | -10.50                   | -4.89                      |
| 2              | $0.936 \pm 0.006$                   | $20.40 \pm 5.36$                   | $-5.18 \pm 0.09$                   | -10.50                   | -5.31                      |
| 3              | $0.849 \pm 0.006$                   | $21.70 \pm 6.07$                   | $-5.38 \pm 0.10$                   | -10.50                   | -5.07                      |
| <b>Average</b> | <b><math>0.893 \pm 0.006</math></b> | <b><math>21.23 \pm 6.12</math></b> | <b><math>-5.37 \pm 0.10</math></b> | <b>-10.50</b>            | <b>-5.09</b>               |

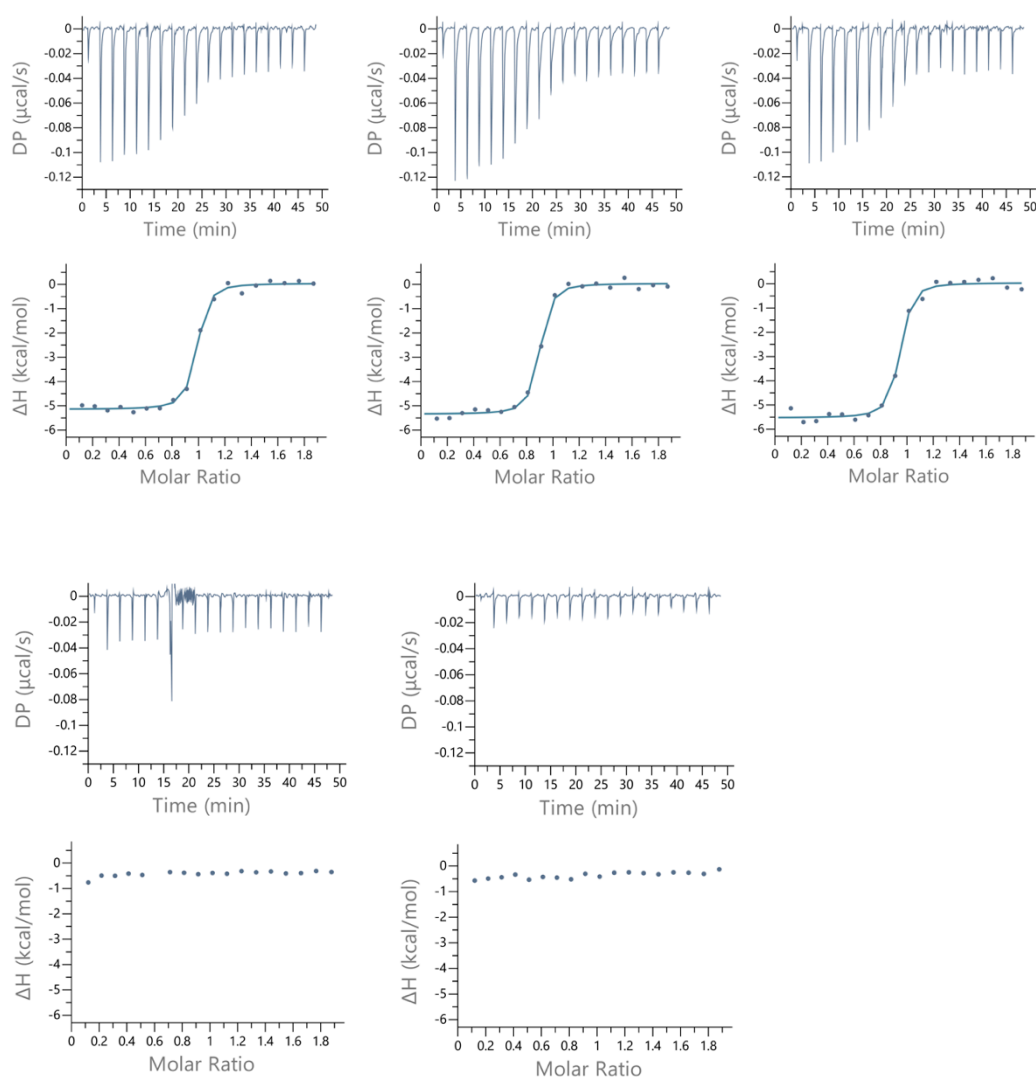

**Figure S5.** Isothermal Titration Calorimetry thermograms of the three independent experiments of the titration of compound **17u** to hNNMT (top) and the thermograms of the control experiments of titrations of buffer to enzyme and compound **17u** to buffer (bottom).

## Selectivity studies

The results of selectivity assays against twelve different methyltransferases are summarized in Table S4 and the accompanying bar graph below.

**Table S4.** Selectivity data for compound 17u against a panel of 12 methyltransferases. Results are presented as % activity at the indicated concentrations. Enzyme activity <50% indicated in green.

| MTase  | Activity (%) |       |       |             |       |       | Average Activity (%) |             |
|--------|--------------|-------|-------|-------------|-------|-------|----------------------|-------------|
|        | @1 $\mu$ M   |       |       | @10 $\mu$ M |       |       | 1 $\mu$ M            | 10 $\mu$ M  |
|        | Exp 1        | Exp 2 | Exp 3 | Exp 1       | Exp 2 | Exp 3 |                      |             |
| PNMT*  | 95           | 96    |       | 70          | 67    |       | 96 $\pm$ 1           | 69 $\pm$ 2  |
| CARM1  | 101          | 100   | 102   | 98          | 99    | 102   | 100 $\pm$ 1          | 100 $\pm$ 2 |
| G9a    | 115          | 108   | 101   | 99          | 103   | 95    | 108 $\pm$ 7          | 99 $\pm$ 4  |
| SETDB1 | 120          | 108   | 109   | 105         | 114   | 105   | 112 $\pm$ 7          | 108 $\pm$ 5 |
| SETD2  | 108          | 109   | 114   | 94          | 93    | 91    | 110 $\pm$ 3          | 93 $\pm$ 2  |
| MLL1   | 107          | 116   | 115   | 84          | 82    | 76    | 113 $\pm$ 5          | 81 $\pm$ 4  |
| SMYD2  | 43           | 37    | 38    | 19          | 19    | 19    | 39 $\pm$ 3           | 19 $\pm$ 0  |
| PRMT1  | 115          | 114   | 104   | 109         | 101   | 101   | 111 $\pm$ 7          | 104 $\pm$ 5 |
| PRMT5  | 86           | 93    | 89    | 35          | 38    | 35    | 90 $\pm$ 3           | 36 $\pm$ 2  |
| PRMT7  | 100          | 95    | 97    | 67          | 70    | 65    | 97 $\pm$ 2           | 67 $\pm$ 3  |
| DNMT1  | 114          | 104   | 101   | 102         | 101   | 106   | 106 $\pm$ 7          | 103 $\pm$ 3 |
| DOT1L  | 89           | 59    | 70    | 37          | 40    | 41    | 73 $\pm$ 15          | 39 $\pm$ 2  |

\* Data extracted from the inhibition curve presented in figure S6

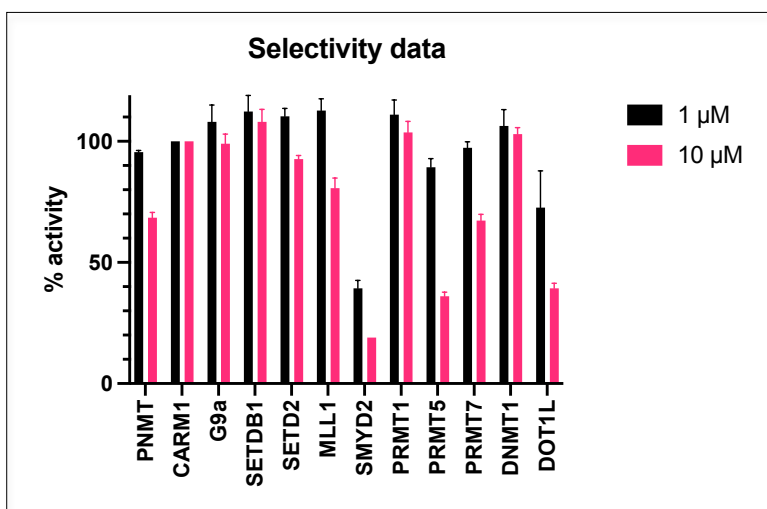

### PNMT selectivity assay

The phenylethanolamine N-methyltransferase (PNMT) assay was developed using the Promega MTase-Glo™ Methyltransferase Assay (Promega Corporation, US, #V7601). In the coupled luminescence-based assay, the enzymatic product SAH is converted into ADP and subsequently into light.<sup>1</sup> Human recombinant PNMT was purchased from ProSpec-Tany TechnoGene Ltd, Israel (#ENZ-457). After establishing the concentration of enzyme to use in the assay, the  $K_M$  values for

cofactor SAM and substrate (+)-norepinephrine were determined. The measured  $K_M$  values were 2.6  $\mu\text{M}$  for SAM and 5.9  $\mu\text{M}$  for (+)-norepinephrine. The final conditions of the assay were set at 125 nM PNMT, 5  $\mu\text{M}$  SAM, 10  $\mu\text{M}$  (+)-norepinephrine and a reaction time of 45 minutes. The reactions were performed in half area, flat bottom, white 96 well plates (Greiner Bio-One #675074) with a final volume of the reaction mixture of 10  $\mu\text{L}$ . Inhibitors (2  $\mu\text{L}$ ) were pre-incubated with the enzyme in the presence of substrate (4  $\mu\text{L}$ ) for 10 minutes before the methyltransferase reaction was initiated through addition of cofactor SAM (4  $\mu\text{L}$ ). After 45 minutes, the MTase Glo detection solution (10  $\mu\text{L}$ ) was added and incubated for 60 minutes followed by analysis of the luminescent signal in a plate reader. Compound **17u** was tested at 3.7, 11.1, 33.3 and 100  $\mu\text{M}$  in duplicate.

The luminescence data were analysed using GraphPad Prism (version 8.4.3). The luminescence of the positive control ( $L_p$ ) in each dataset was defined as 100% activity. This value was included in the  $\text{IC}_{50}$  graphs at a concentration of 1.5 log values below the lowest concentration tested. The luminescence data of the negative controls ( $L_n$ ) in each dataset were subtracted from the obtained luminescence data. The percent activity in the presence of each inhibitor was calculated according to the following equation: % activity =  $(L - L_n)/(L_p - L_n)$ , where  $L$  = the luminescence in the presence of the compound,  $L_n$  = the luminescence in the absence of the enzyme, and  $L_p$  = the luminescence in the absence of the inhibitor. The percent activity values were plotted as a function of inhibitor concentrations and fitted using non-linear regression analysis of the Sigmoidal dose-response curve generated using the equation  $Y=100/(1+10^{((\text{LogIC}_{50}-X)*\text{HillSlope}))})$ . The  $\text{IC}_{50}$  value was determined by the concentration resulting in a half-maximal percent activity (Figure S6).

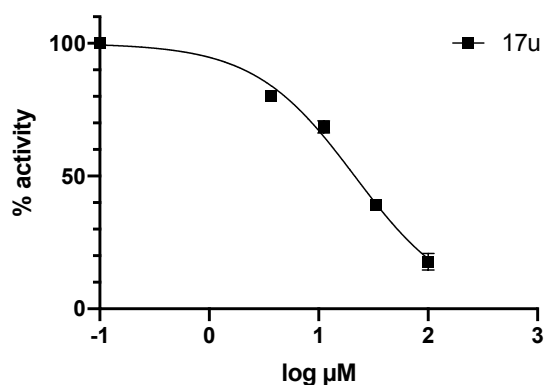

**Figure S6.** Inhibition curve for compound **17u** against PNMT. The experiment was performed in duplicate.

## Docking and FEP simulation of compound 17v

Compound **17v** was docked in NNMT co-crystal structure 6PVE (Figure S7). The experimental values (4.11 kcal/mol) and calculated values (7.21 kcal/mol) of the differences in free binding energy ( $\Delta G$ ) compared to unsubstituted compound **17x** were found to be similar with a minor overestimation of the affinity in the model.

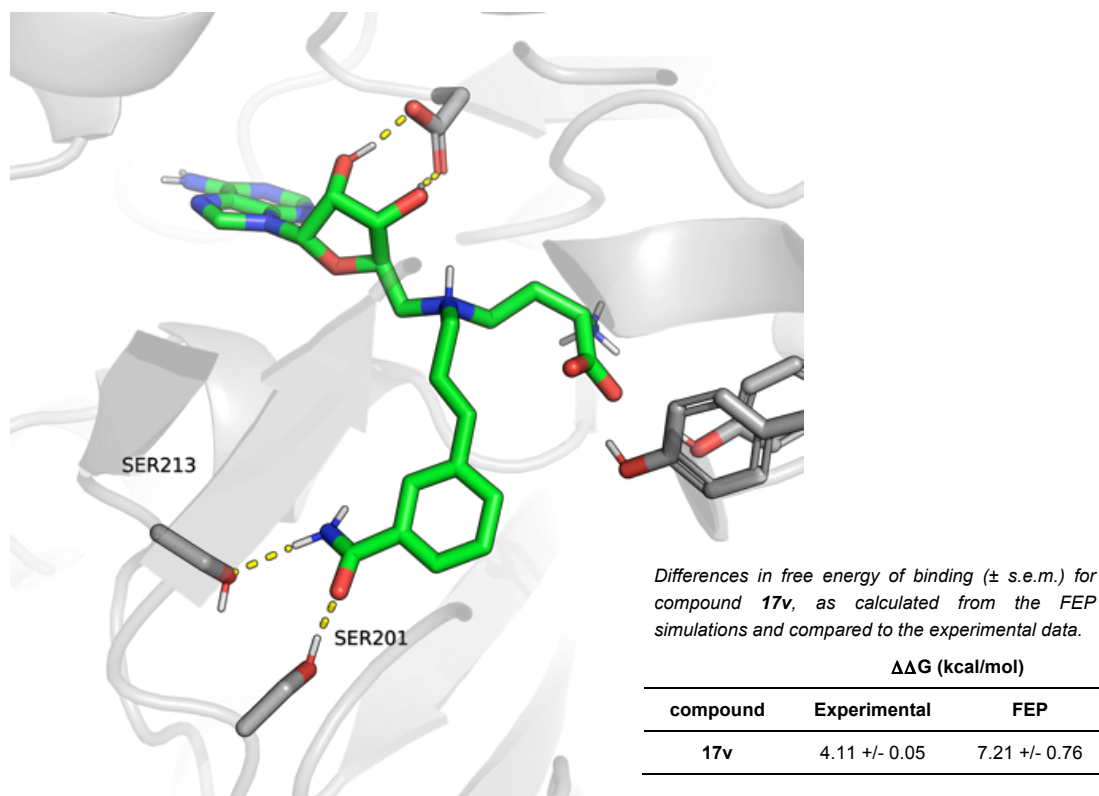

**Figure S7.** Result of modeling of compounds **17v**, bearing the meta-amide substituent, in the active site of NNMT (PDB ID: 6PVE). The results indicate strong hydrogen bonding interactions with serine residues S201 and S213 similar to that predicted for para-cyano compound **17u**. The modelled predictions are supported by the similarity in the difference in Gibbs free energy ( $\Delta\Delta G$ ) compared to unsubstituted compound **17x** from the biochemical assay and the MD simulations.

## Cell based data

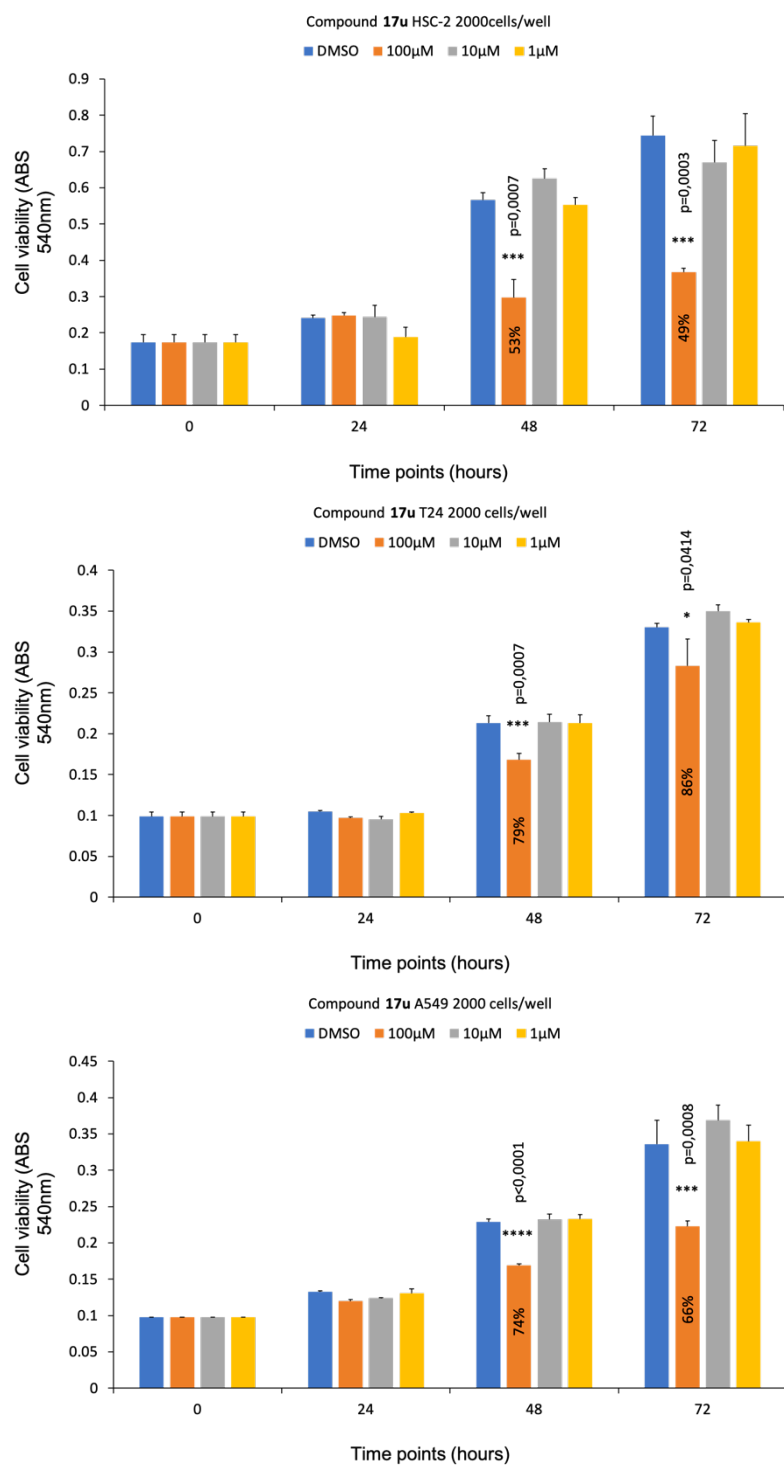

**Figure S8.** Cell viability data of treatment of HSC-2 human oral cancer cell line, T24 human bladder cancer cell line and A549 human lung cancer line with compound **17u** after 0, 24, 48 and 72 hours. Percentage inhibition is given at time-points and concentrations showing significant difference with the DMSO control.

## PAMPA assay

The Permeability ( $P_e$ ) data were calculated using the following equation:

$$P_e = \frac{-\ln \left( 1 - \frac{C_A}{C_{eq}} \right)}{S * \left( \frac{1}{V_D} + \frac{1}{V_A} \right) * t}$$

where

$$C_D = C_0 * \frac{A_D - A_{buffer}}{A_0 - A_{buffer}}$$

$$C_A = C_0 * \frac{A_A - A_{buffer}}{A_0 - A_{buffer}}$$

and

$$C_{eq} = \frac{(C_D * V_D + C_A * V_A)}{V_D + V_A}$$

S is the membrane area (0.3 cm<sup>2</sup>), V<sub>A</sub> is the acceptor well volume (0.2 ml), V<sub>D</sub> is the donor well volume (0.3 ml), t is the incubation time (18480 s), C<sub>A</sub> is the concentration of the drug in the acceptor well at time t, C<sub>D</sub> is the concentration of drug in the donor well at time t, and C<sub>eq</sub> is the equilibrium concentration (compound concentration across donor and acceptor wells if the membrane is 100% permeable to the compound). The concentration listed above are computed from the absorbances of the donor, acceptor, starting and buffer solutions (A<sub>D</sub>, A<sub>A</sub>, A<sub>0</sub> and A<sub>buffer</sub> respectively).

**Table S5.** Cell permeability results from the PAMPA assay

| Compound            |                  | Permeability (* 10 <sup>-6</sup> ) cm/s <sup>1</sup> |
|---------------------|------------------|------------------------------------------------------|
| Caffeine            | Positive control | 6.85                                                 |
| Furosemide          | Negative control | 0.06                                                 |
| Compound <b>17u</b> | Test compound    | 0.01                                                 |

<sup>1</sup>The cut-off between low and high permeability is defined at 1.5 \* 10<sup>-6</sup> cm/s



## HPLC traces of lead compounds

Compound 17i

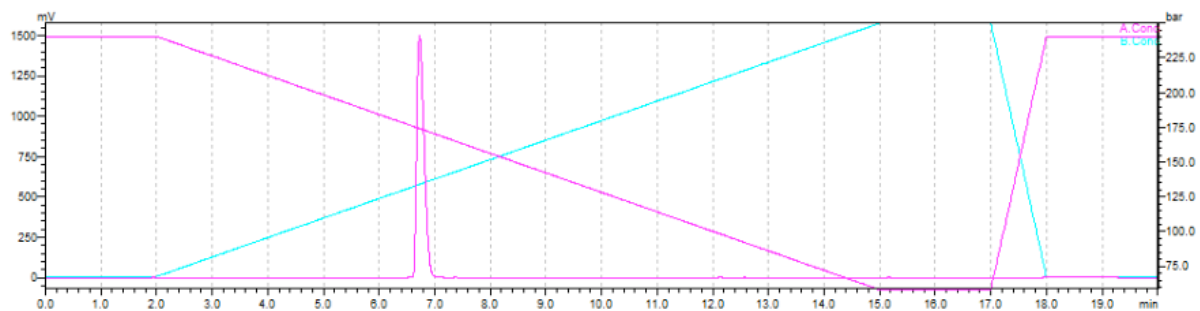

Compound 17l

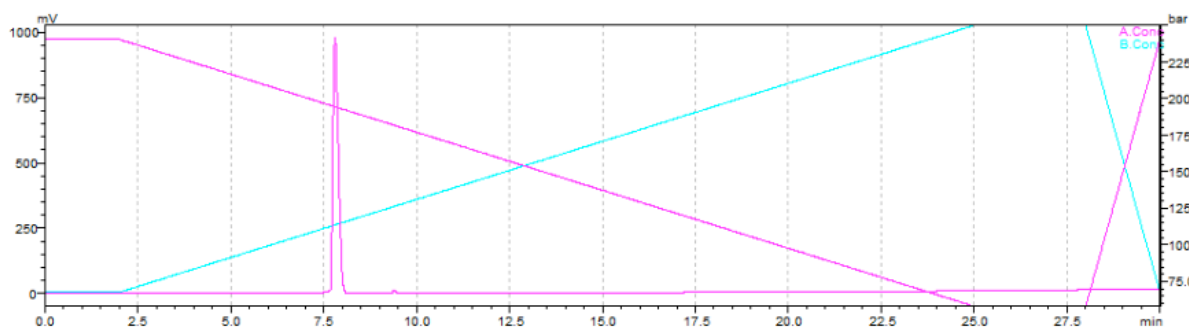

Compound 17o

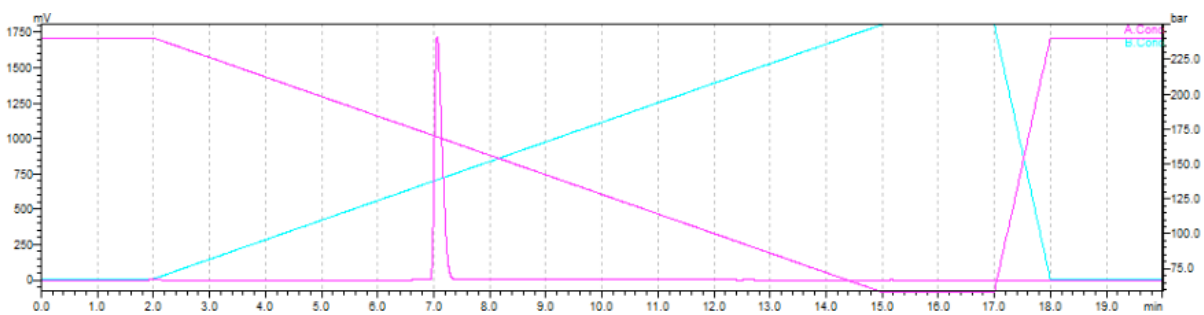

Compound 17r

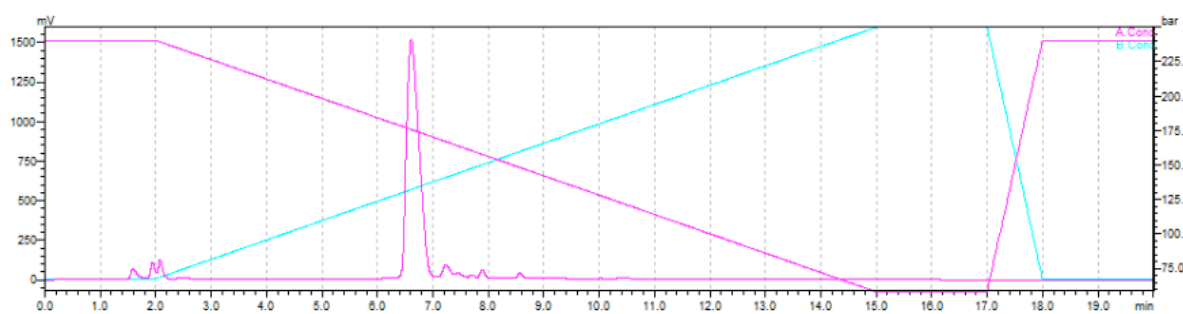

### Compound 17s

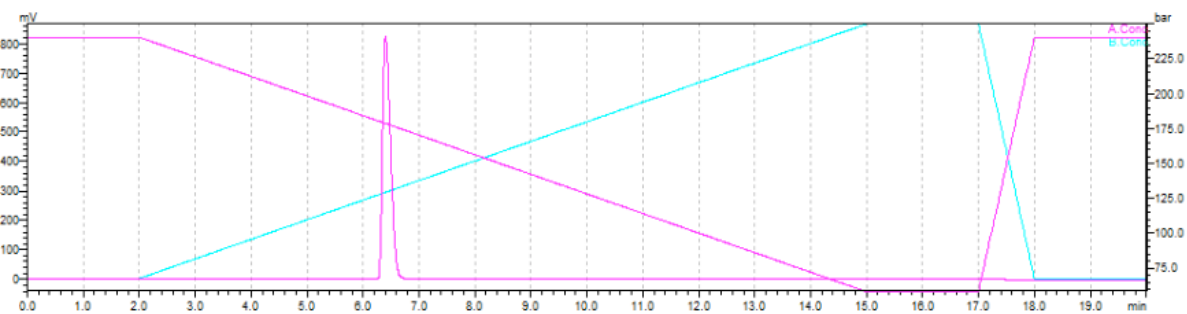

### Compound 17t

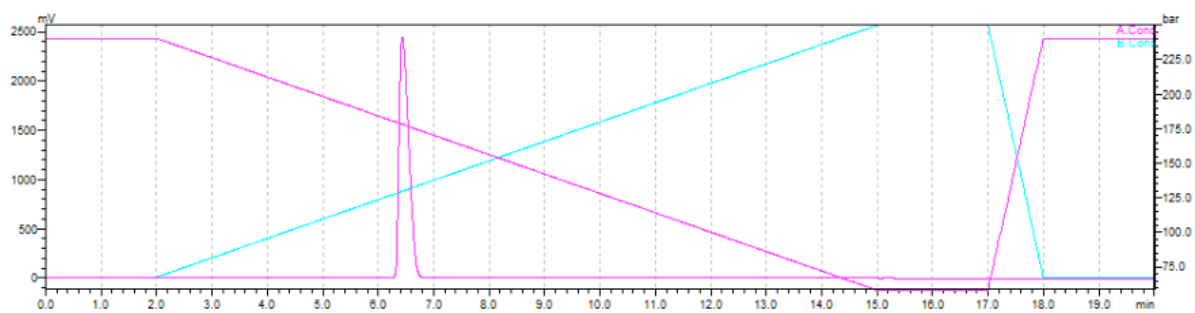

### Compound 17u

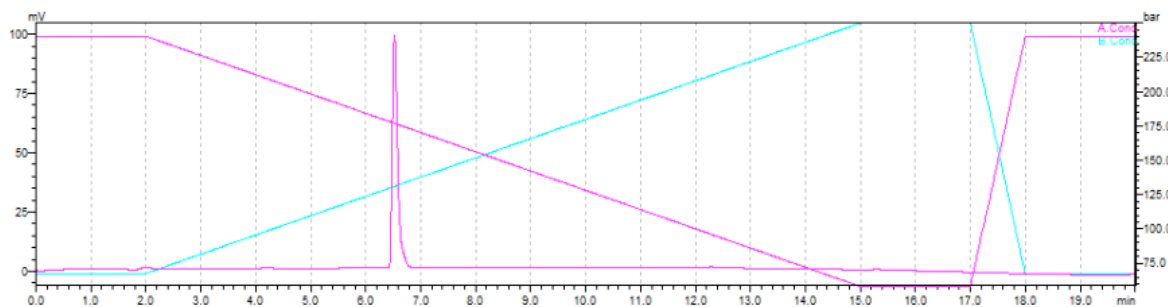

### Compound 17v

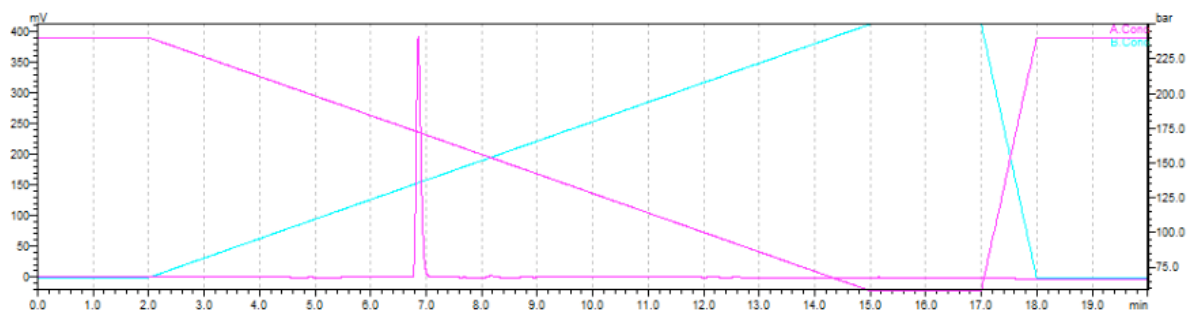

Compound **11**  $^1\text{H}$  NMR (400 MHz)  $\text{CDCl}_3$

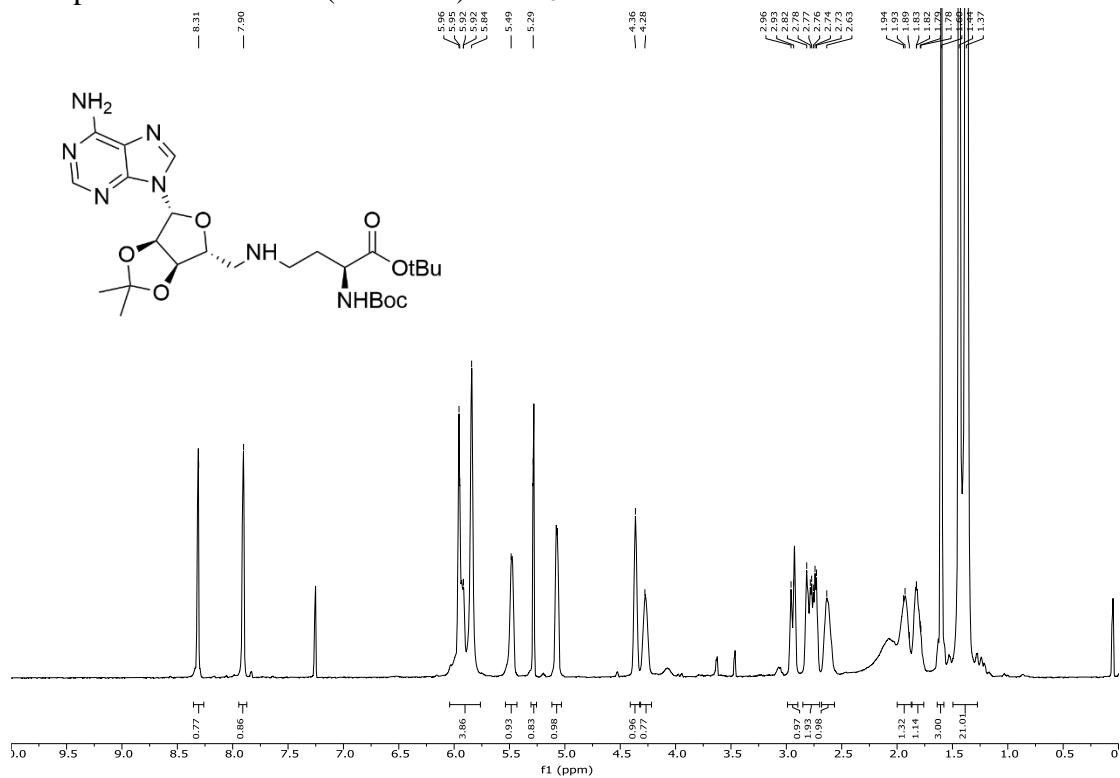

$^{13}\text{C}$  NMR (400 MHz)  $\text{CDCl}_3$

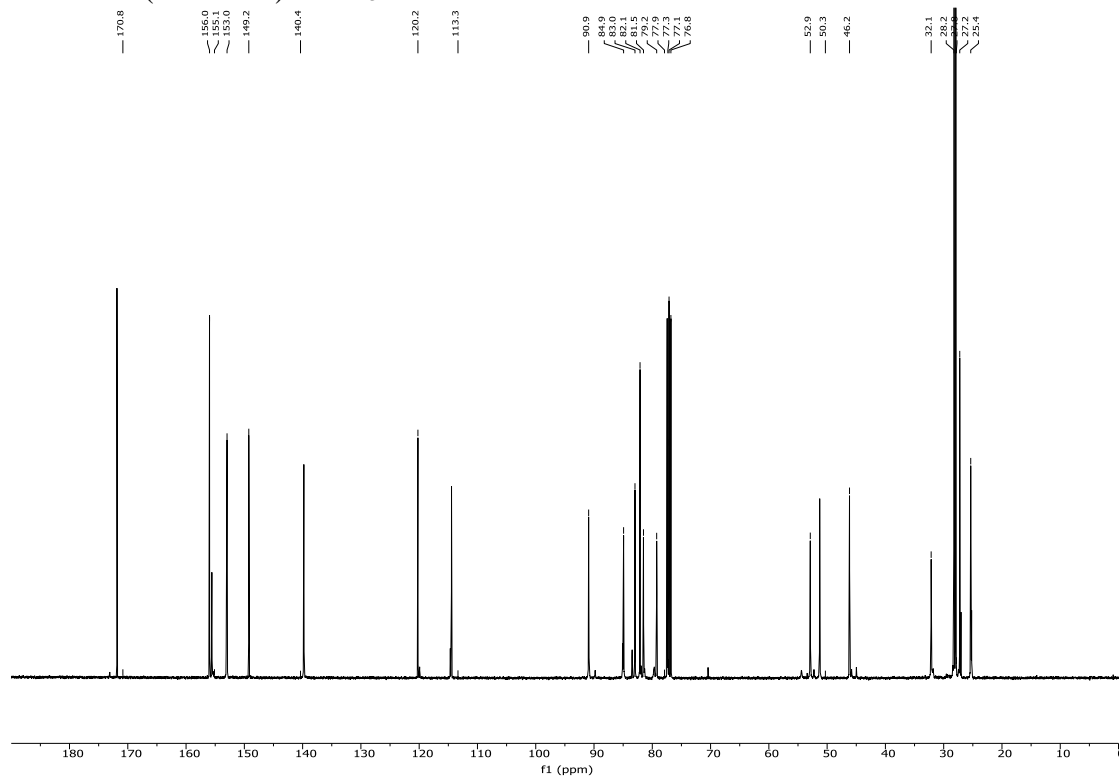

Compound **12a**  $^1\text{H}$  NMR (400 MHz)  $\text{CDCl}_3$

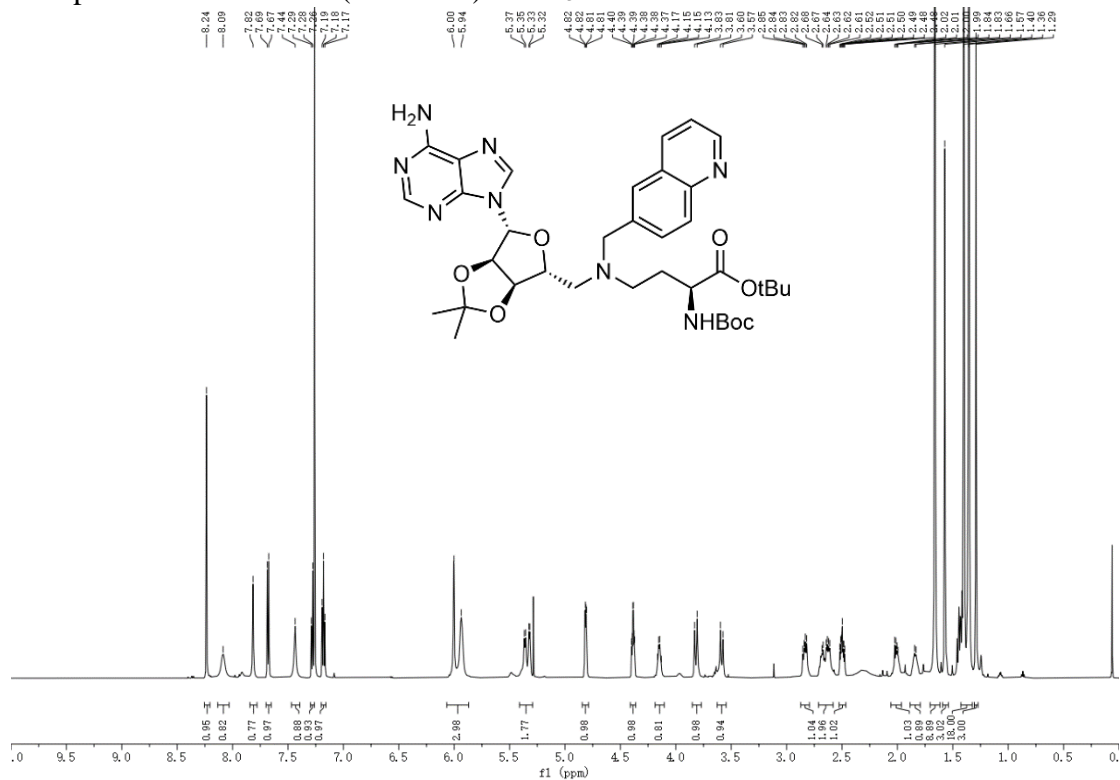

$^{13}\text{C}$  NMR (101 MHz)  $\text{CDCl}_3$

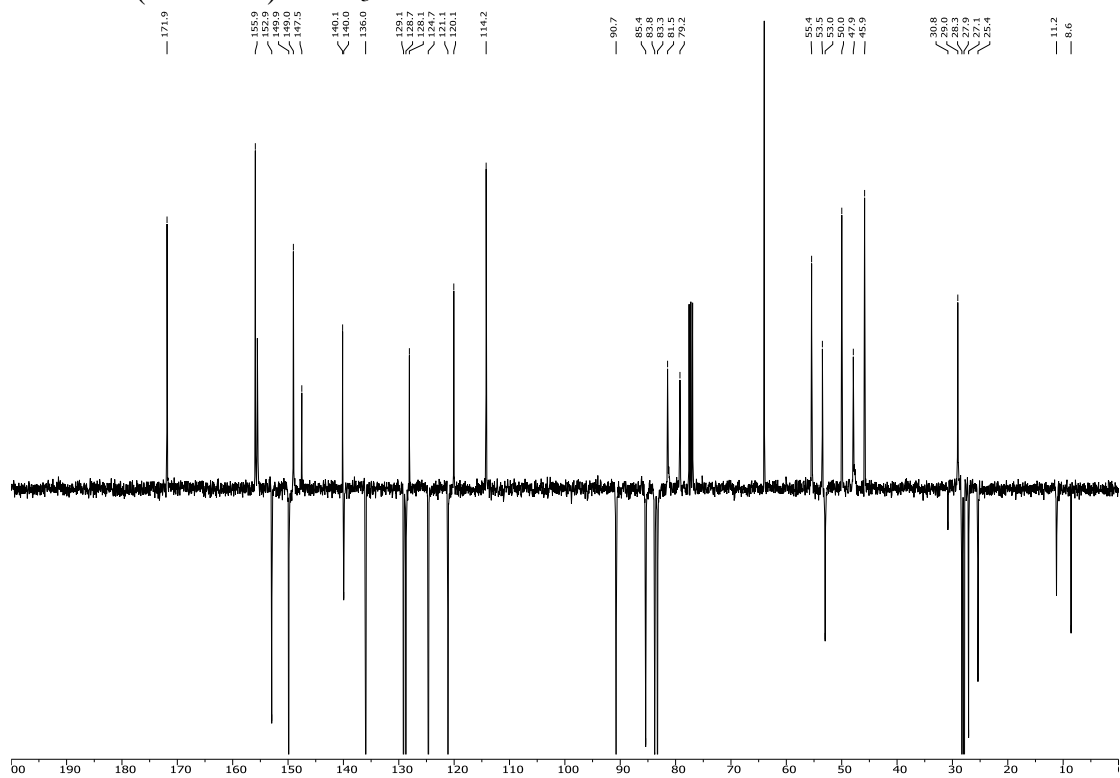

Compound **12c**  $^1\text{H}$  NMR (400 MHz)  $\text{CDCl}_3$

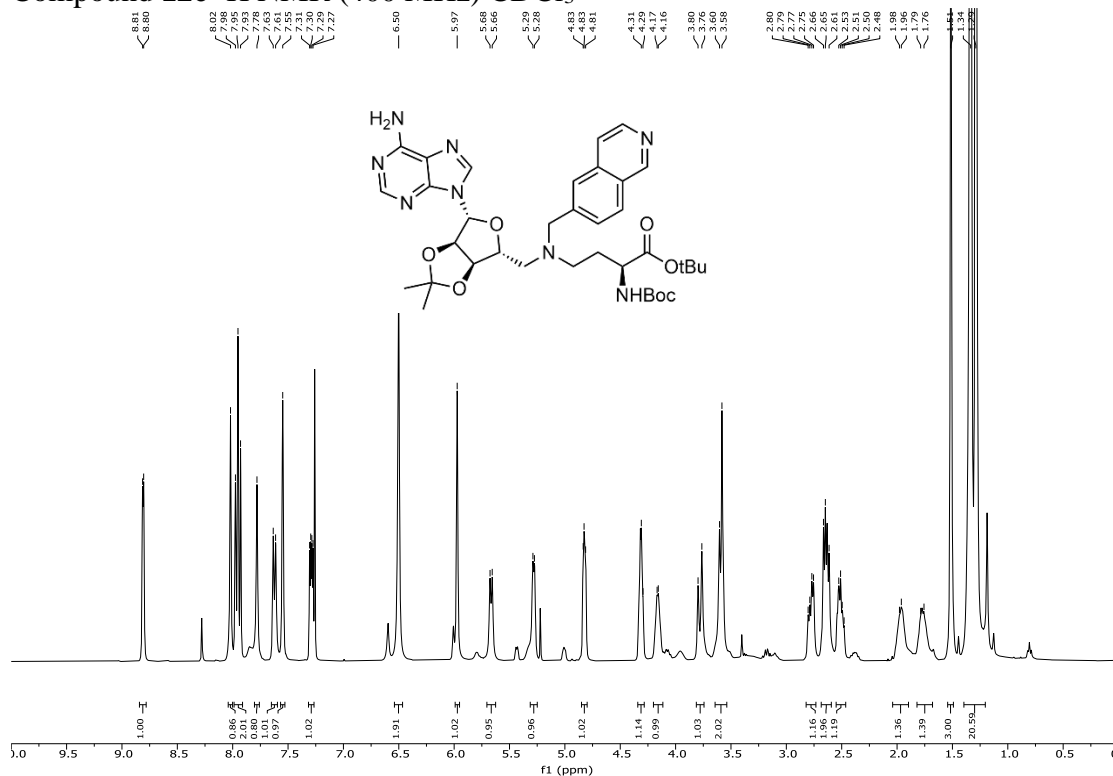

$^{13}\text{C}$  NMR (101 MHz)  $\text{CDCl}_3$

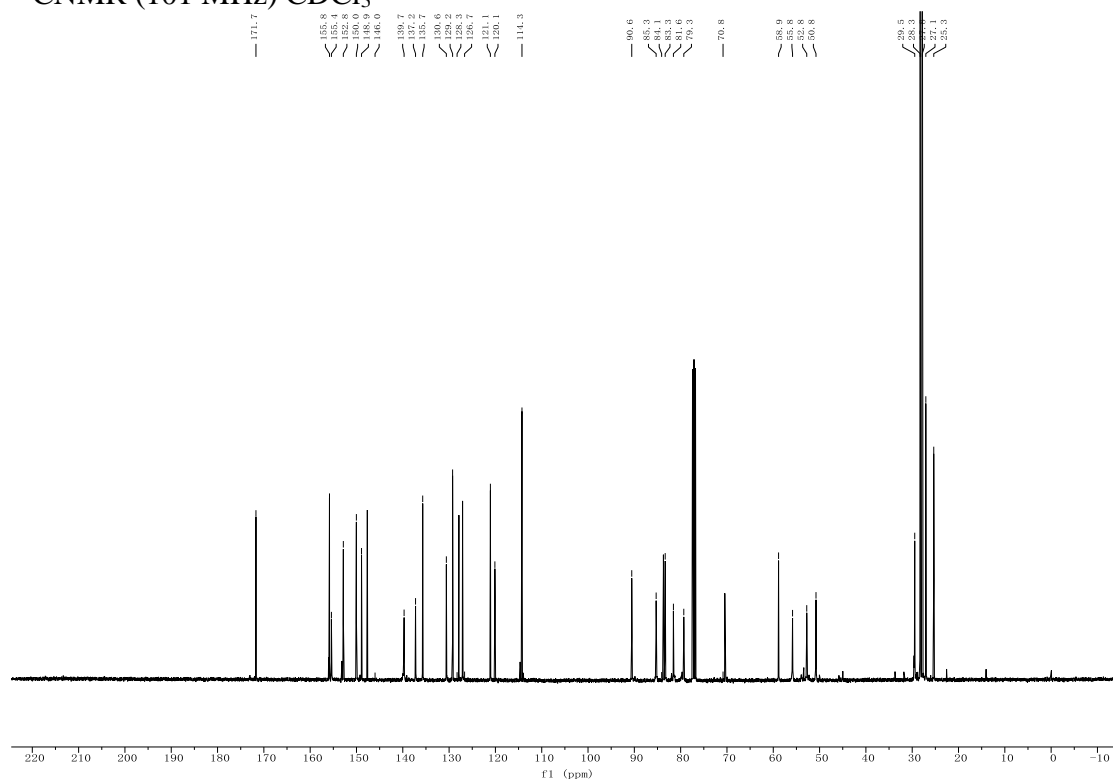

Compound **12d**  $^1\text{H}$  NMR (400 MHz)  $\text{CDCl}_3$

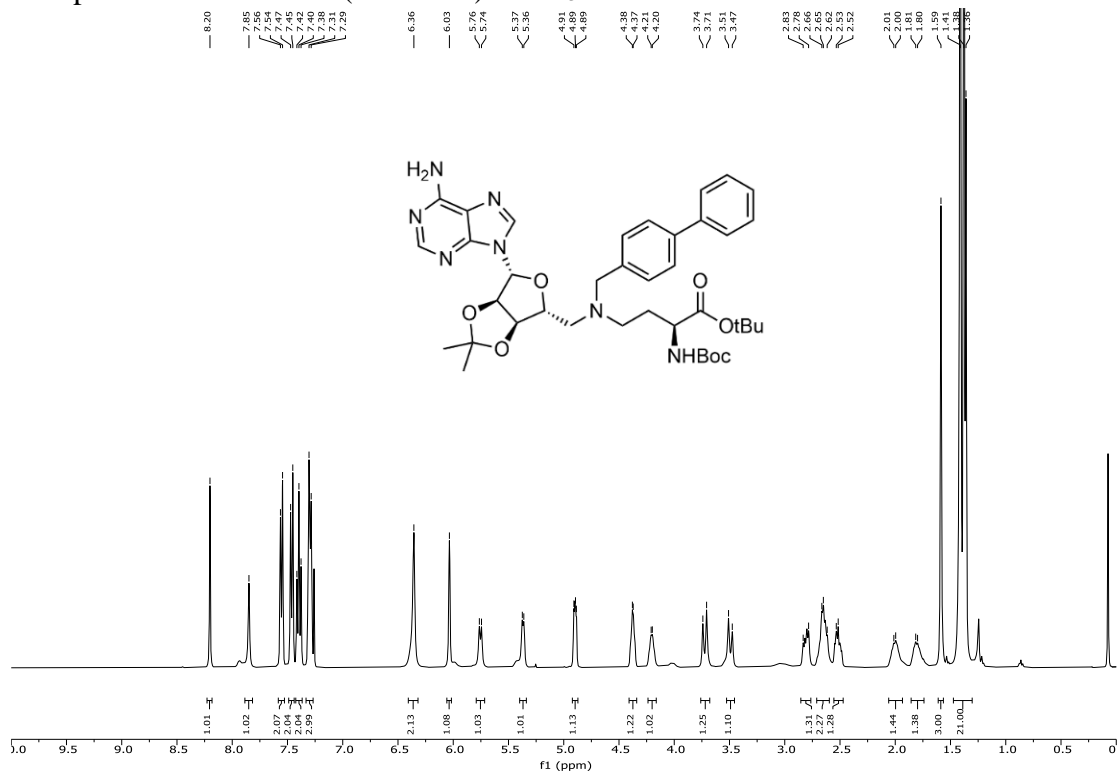

$^{13}\text{C}$  NMR (101 MHz)  $\text{CDCl}_3$

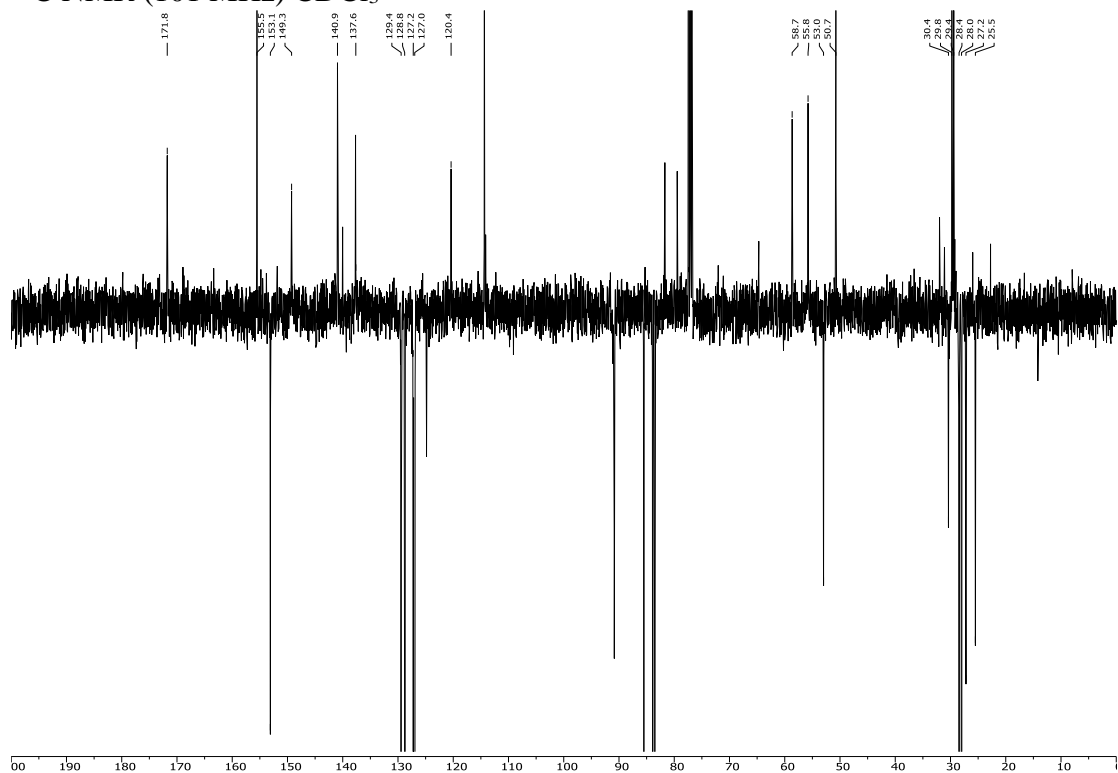

Compound **12e**  $^1\text{H}$  NMR (400 MHz)  $\text{CDCl}_3$

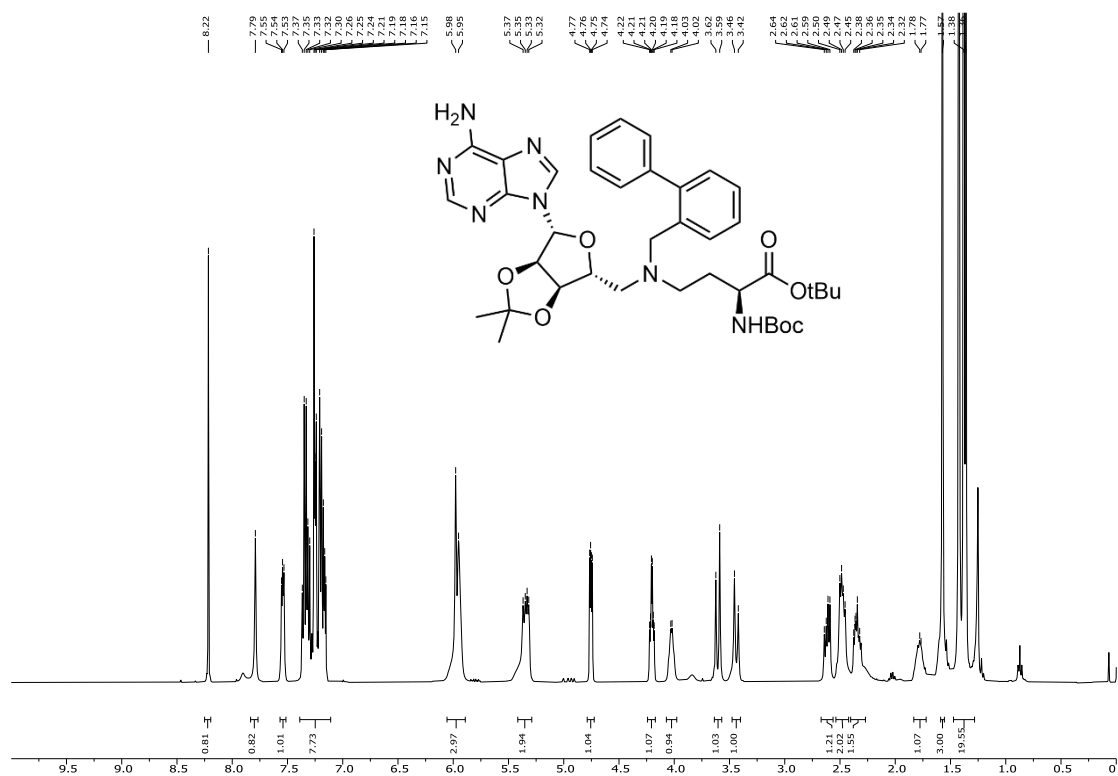

$^{13}\text{C}$  NMR (101 MHz)  $\text{CDCl}_3$

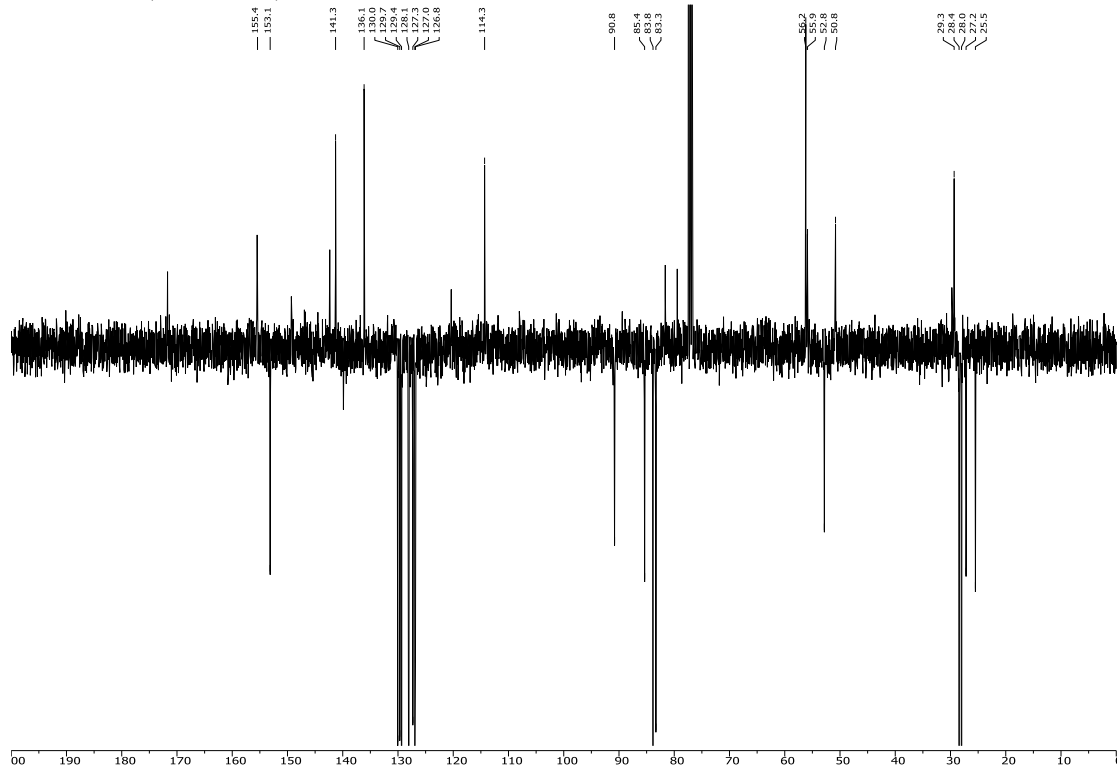

Compound **12f**  $^1\text{H}$  NMR (400 MHz)  $\text{CDCl}_3$

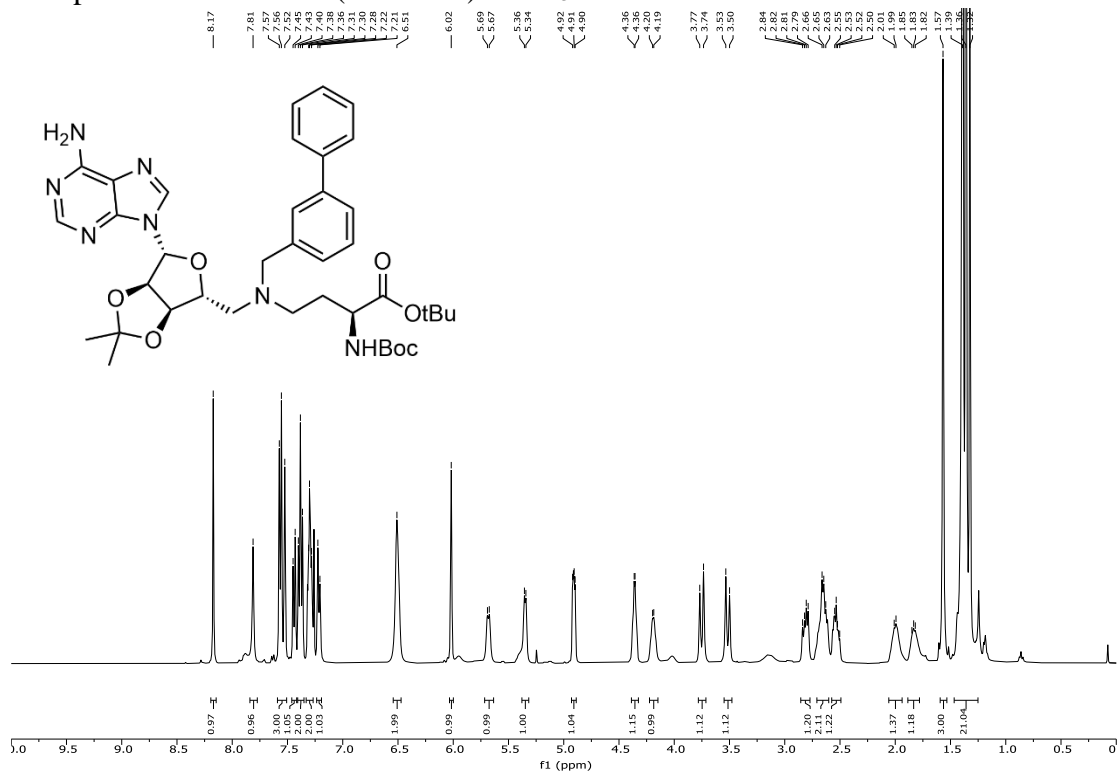

$^{13}\text{C}$  NMR (101 MHz)  $\text{CDCl}_3$

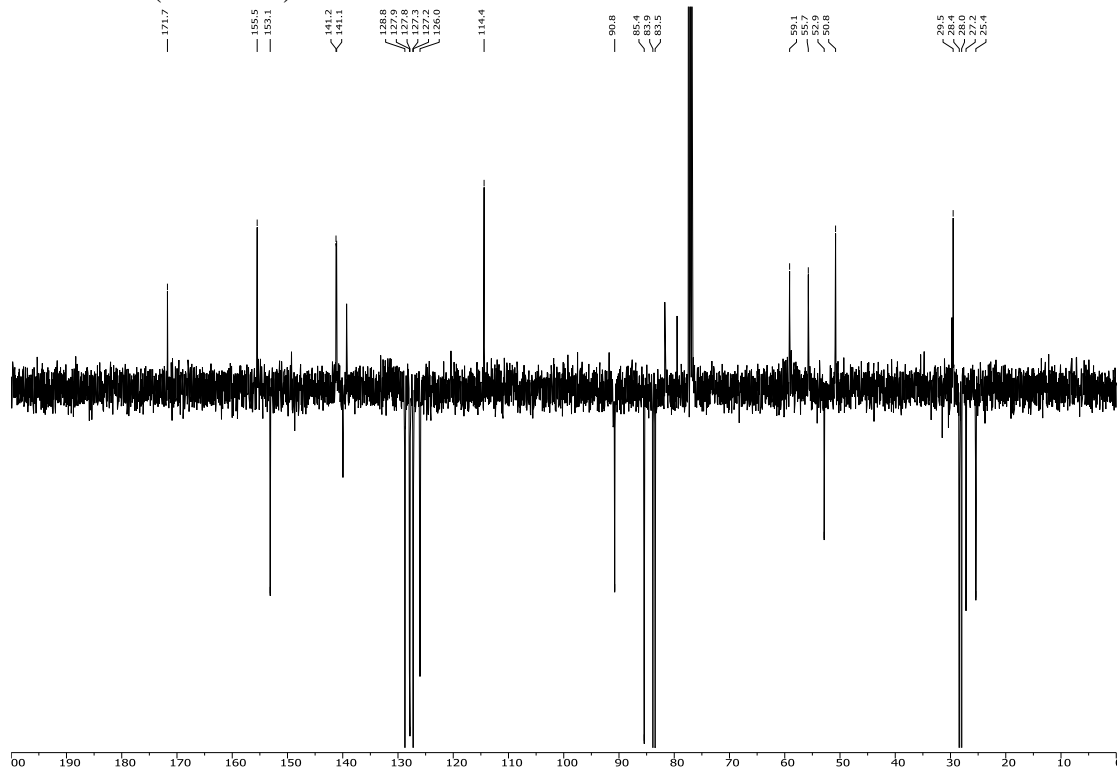



Compound **12g**  $^1\text{H}$  NMR (600 MHz)  $\text{CDCl}_3$

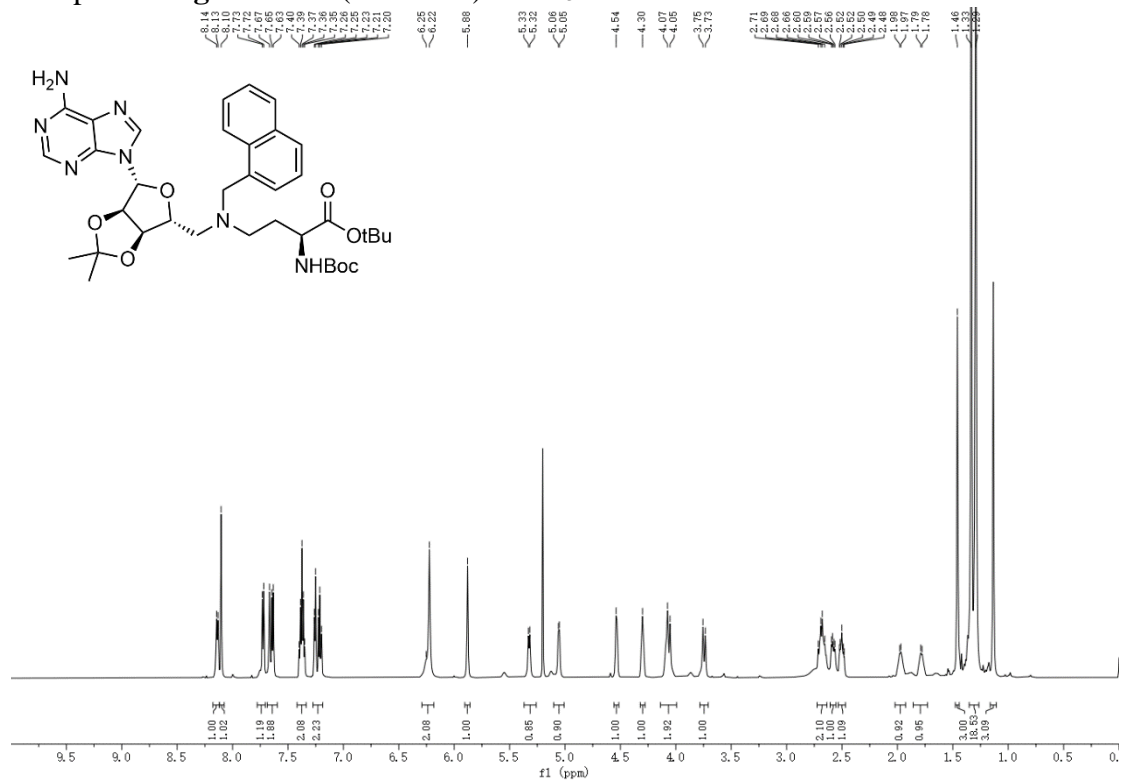

$^{13}\text{C}$  NMR (151 MHz)  $\text{CDCl}_3$

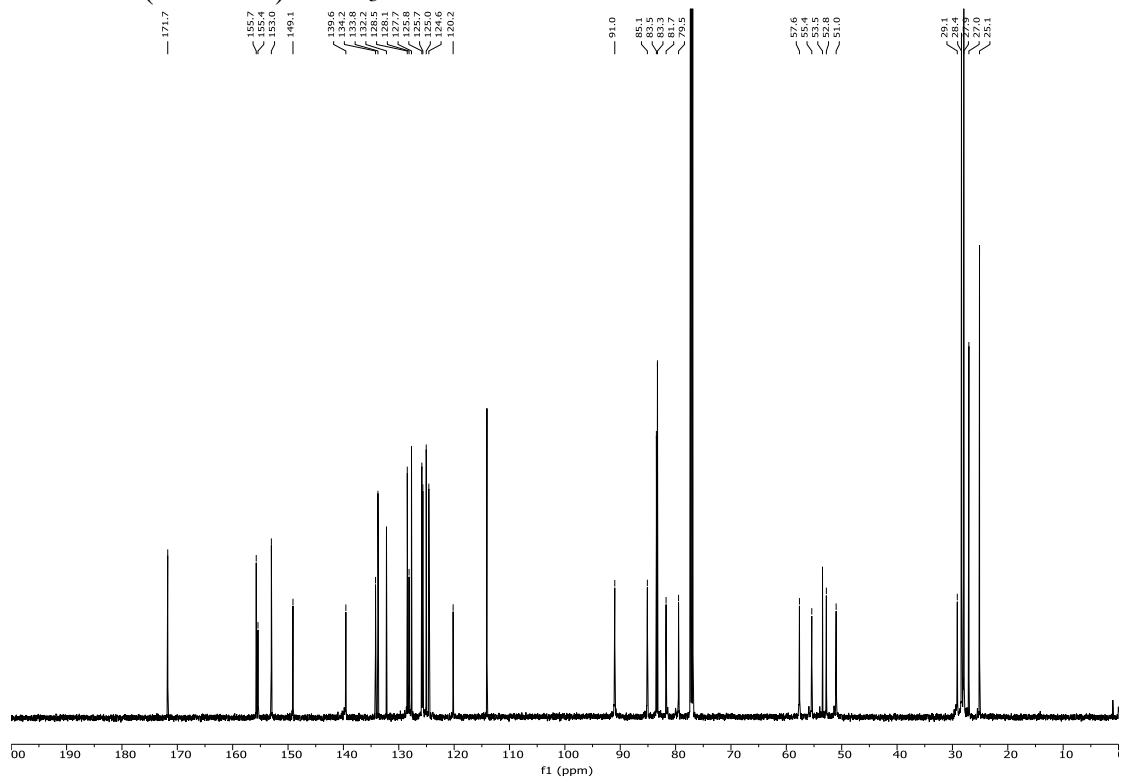

Compound **12h**  $^1\text{H}$  NMR (400 MHz)  $\text{CDCl}_3$

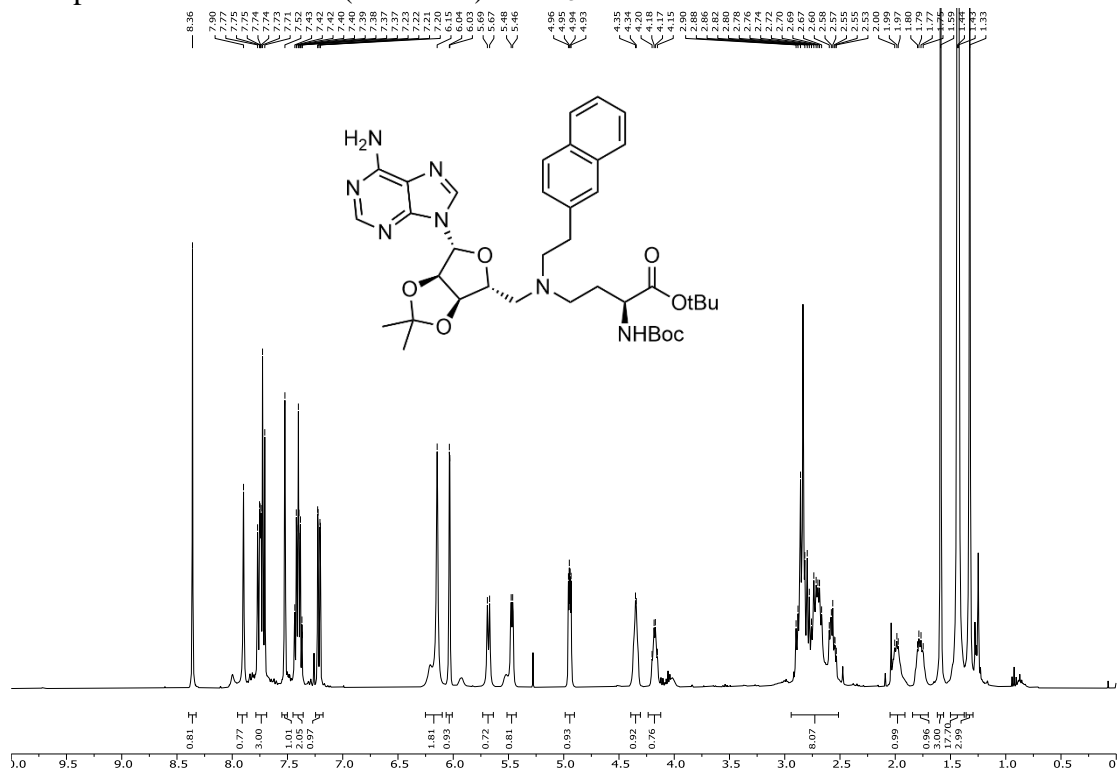

$^{13}\text{C}$  NMR (101 MHz)  $\text{CDCl}_3$

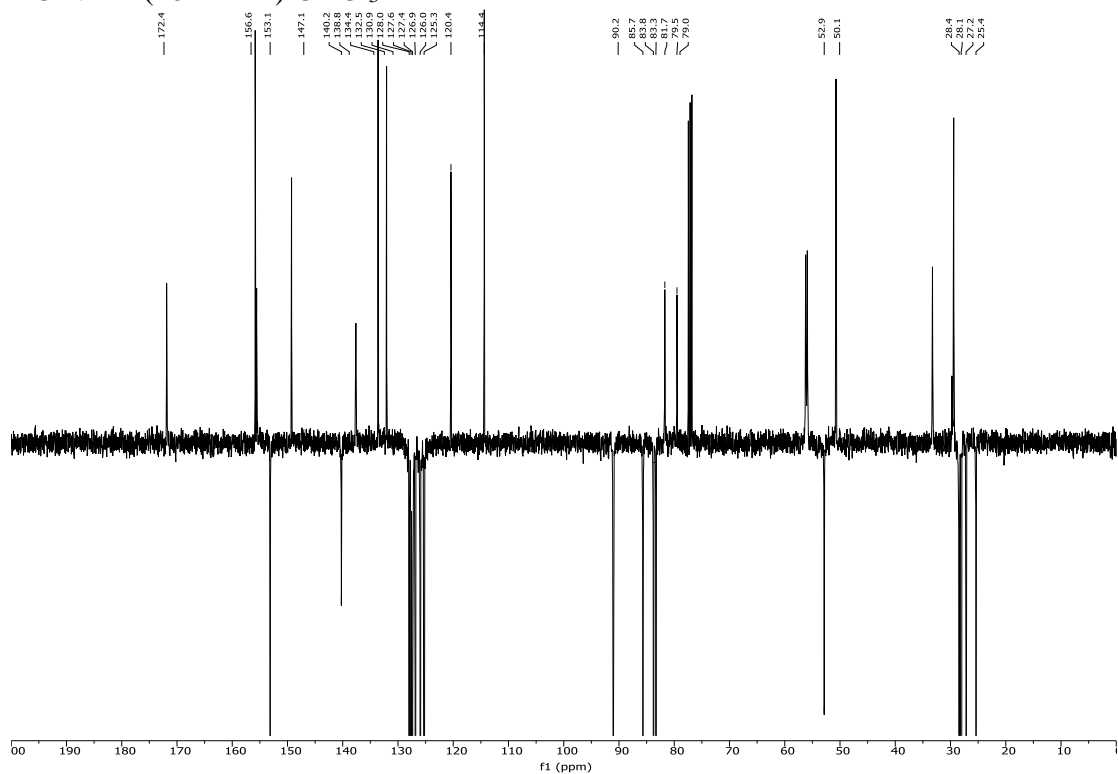

Compound **12i**  $^1\text{H}$  NMR (600 MHz)  $\text{CDCl}_3$

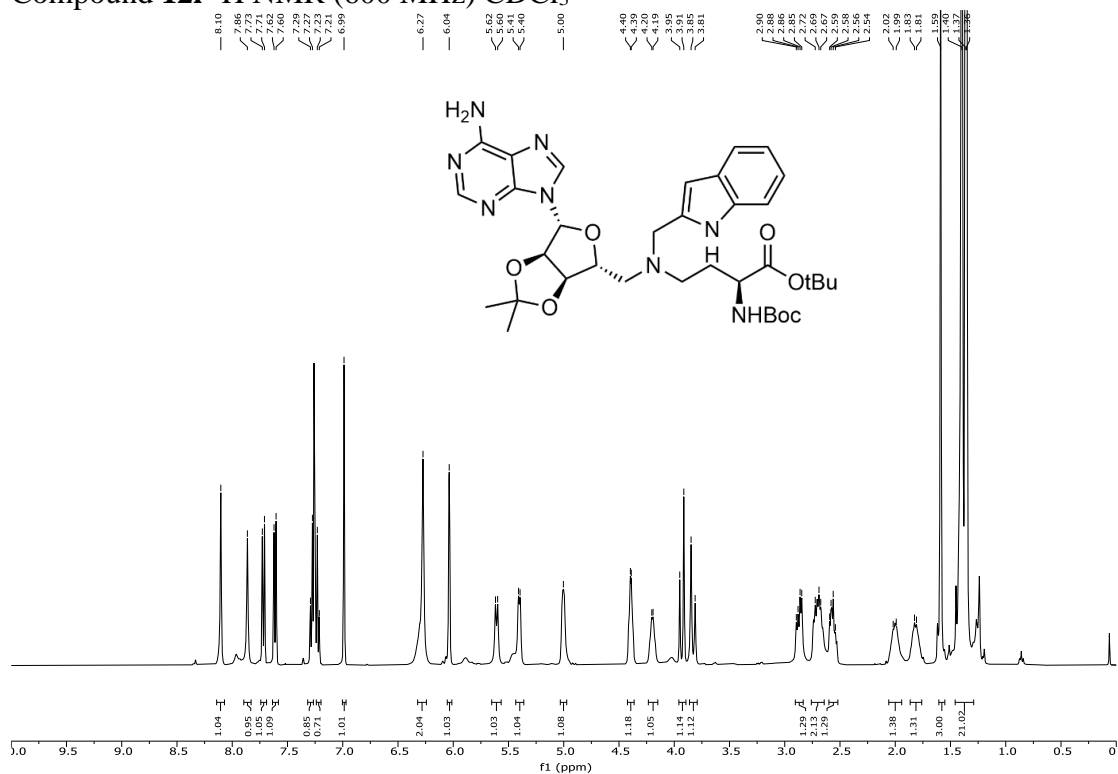

$^{13}\text{C}$  NMR (151 MHz)  $\text{CDCl}_3$

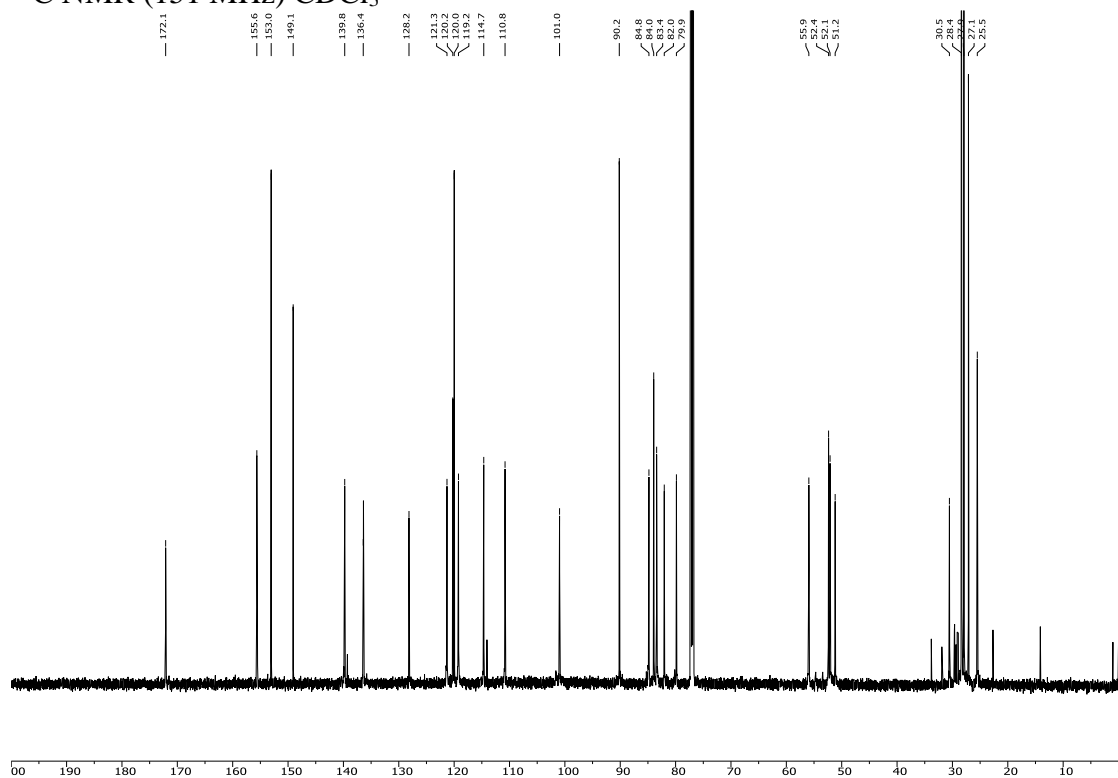

Compound **12j**  $^1\text{H}$  NMR (600 MHz)  $\text{CDCl}_3$

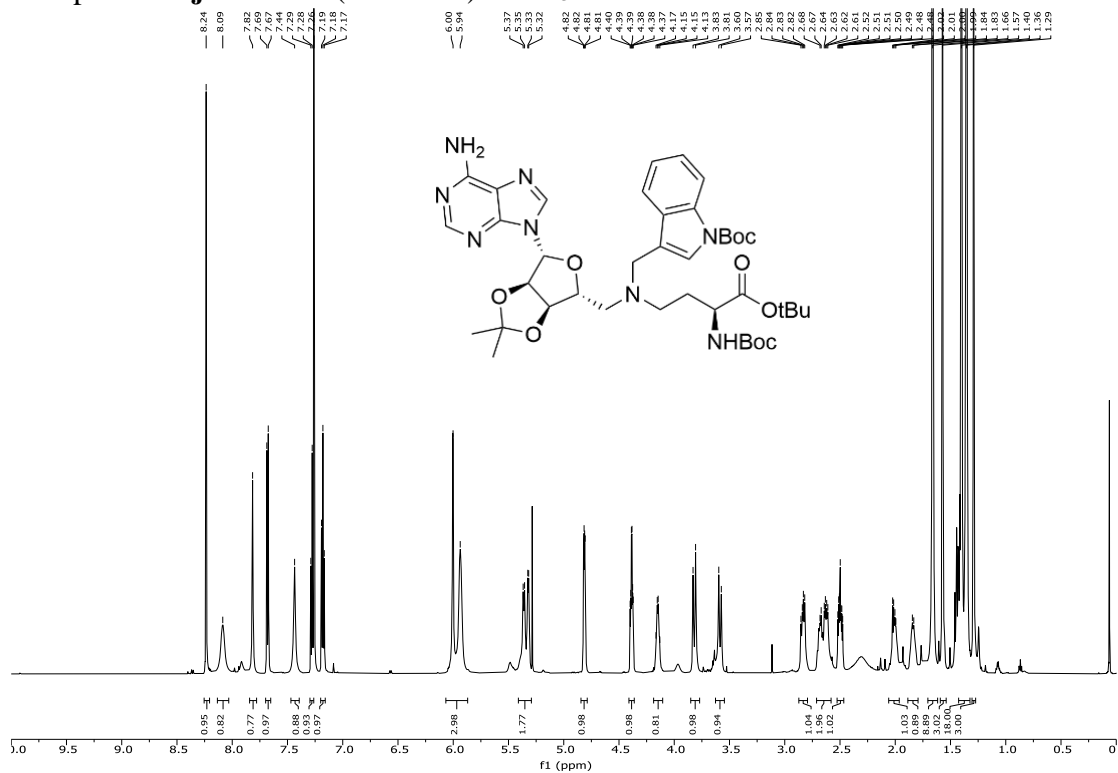

$^{13}\text{C}$  NMR (151 MHz)  $\text{CDCl}_3$

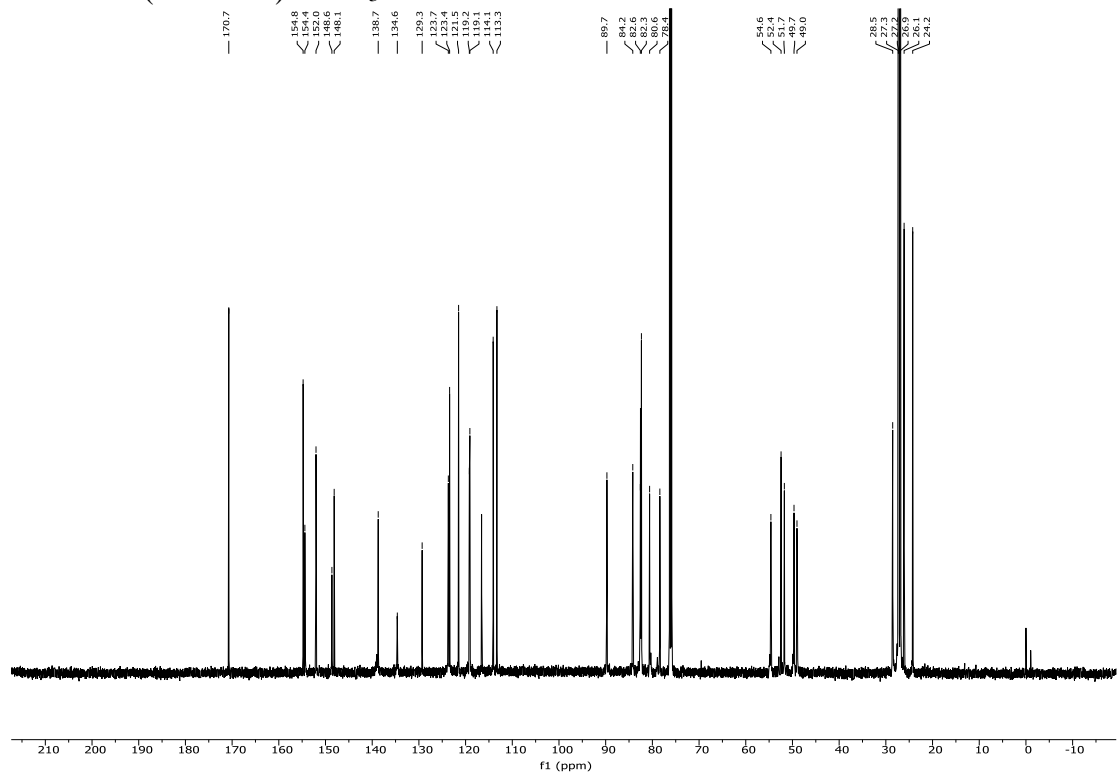

Compound **12k**  $^1\text{H}$  NMR (400 MHz)  $\text{CDCl}_3$

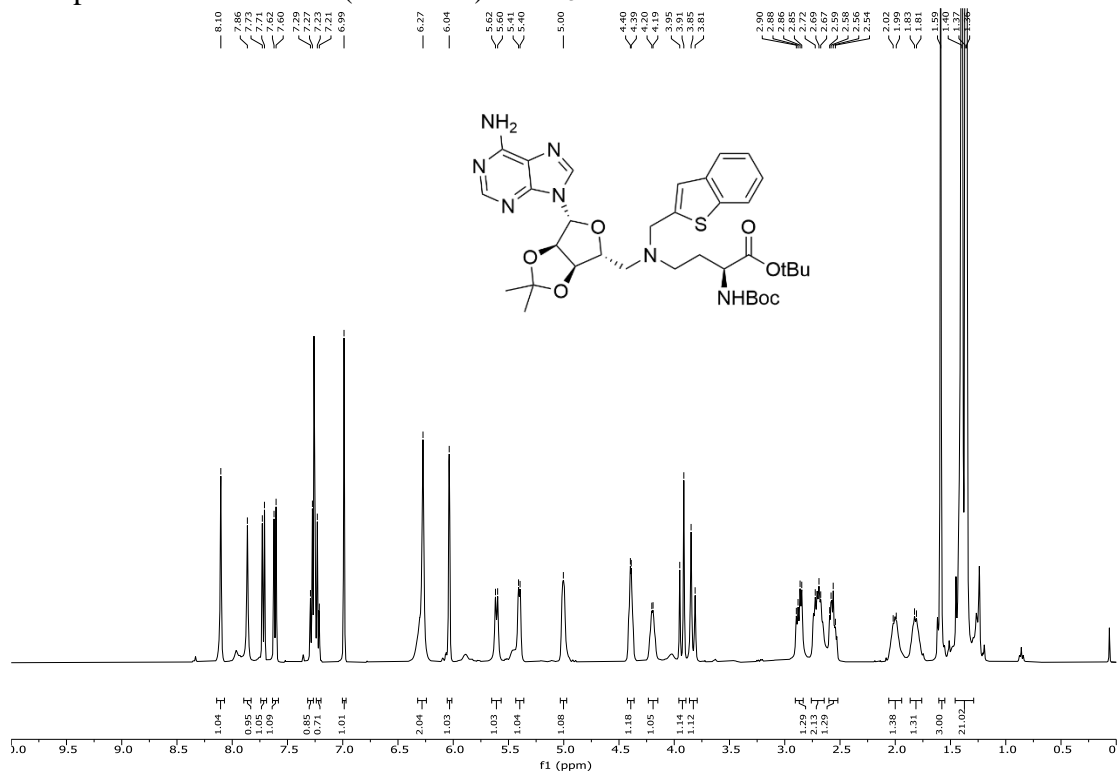

$^{13}\text{C}$  NMR (101 MHz)  $\text{CDCl}_3$

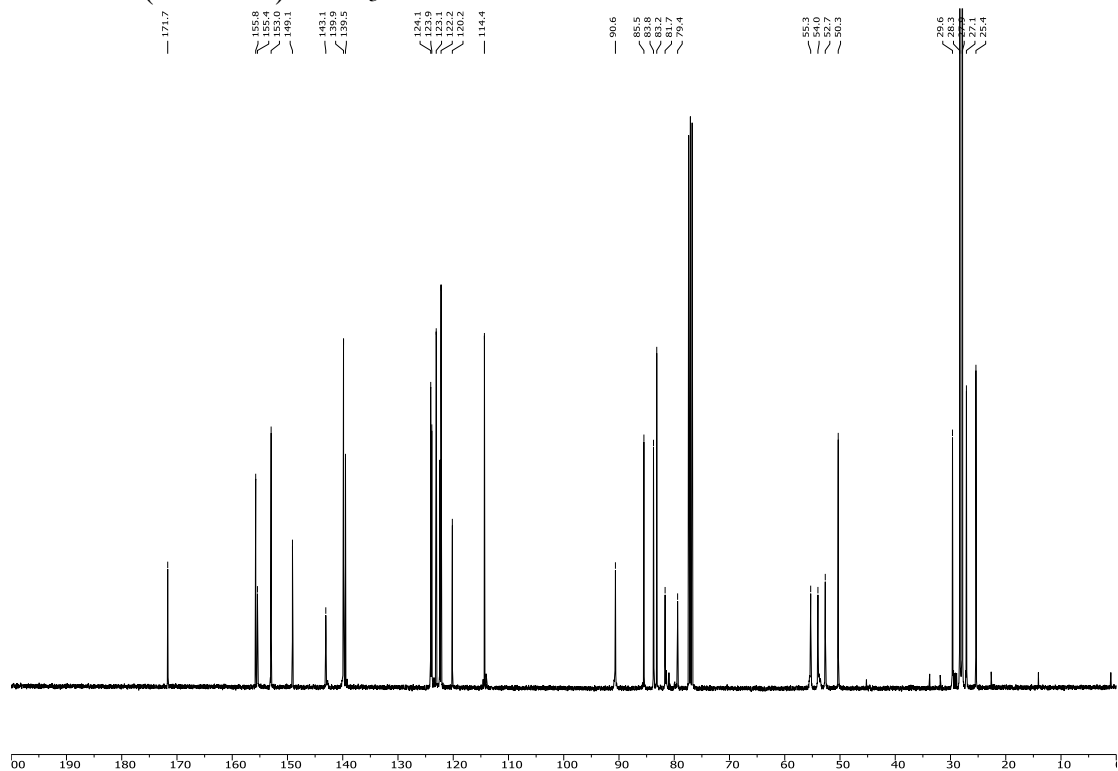

Compound **121**  $^1\text{H}$  NMR (400 MHz)  $\text{CDCl}_3$

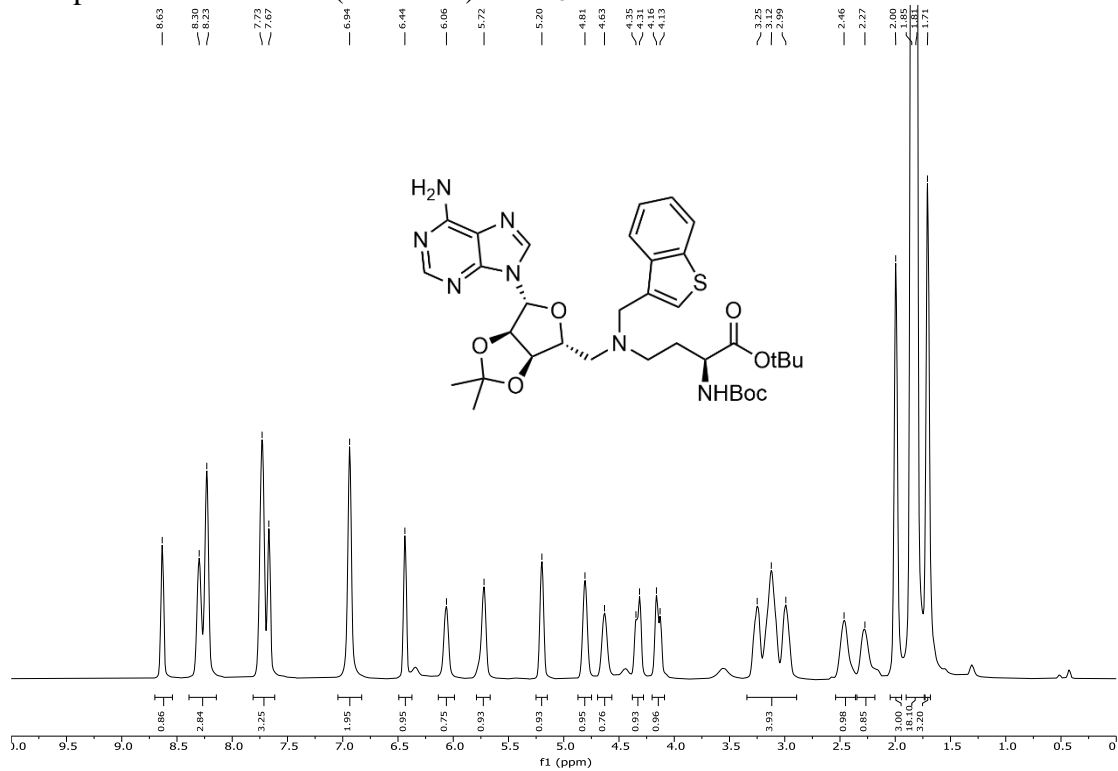

$^{13}\text{C}$  NMR (101 MHz)  $\text{CDCl}_3$

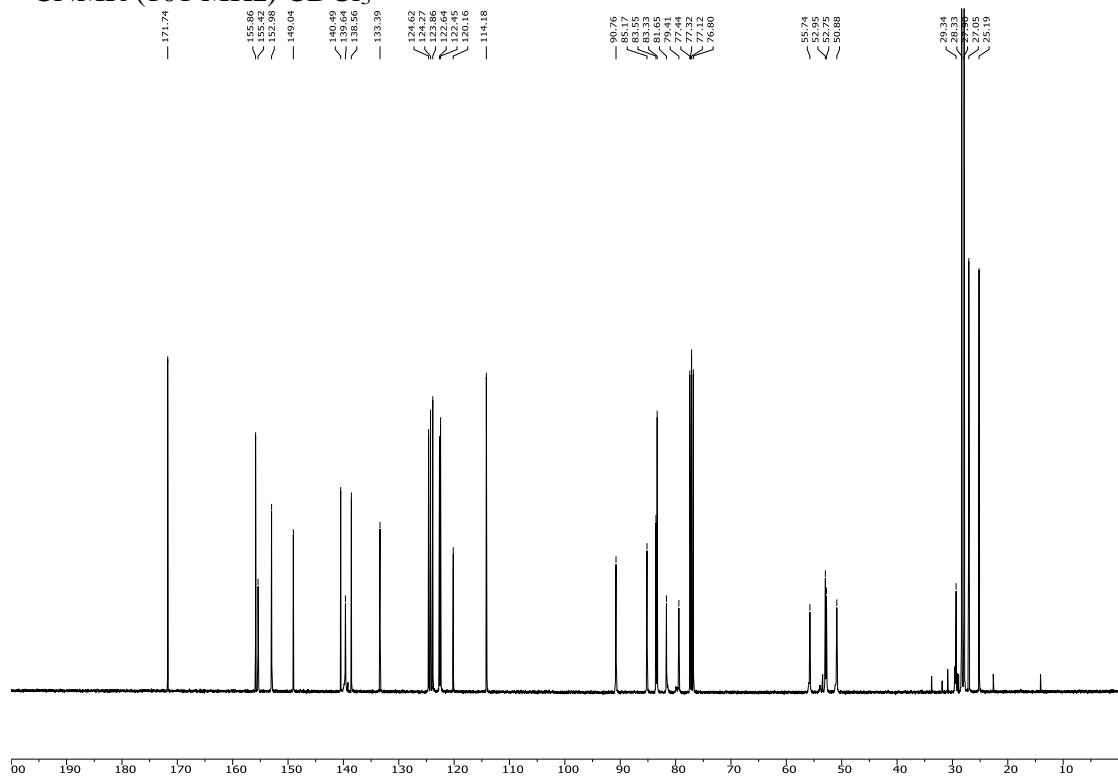

Compound **13a**  $^1\text{H}$  NMR (400 MHz)  $\text{D}_2\text{O}$

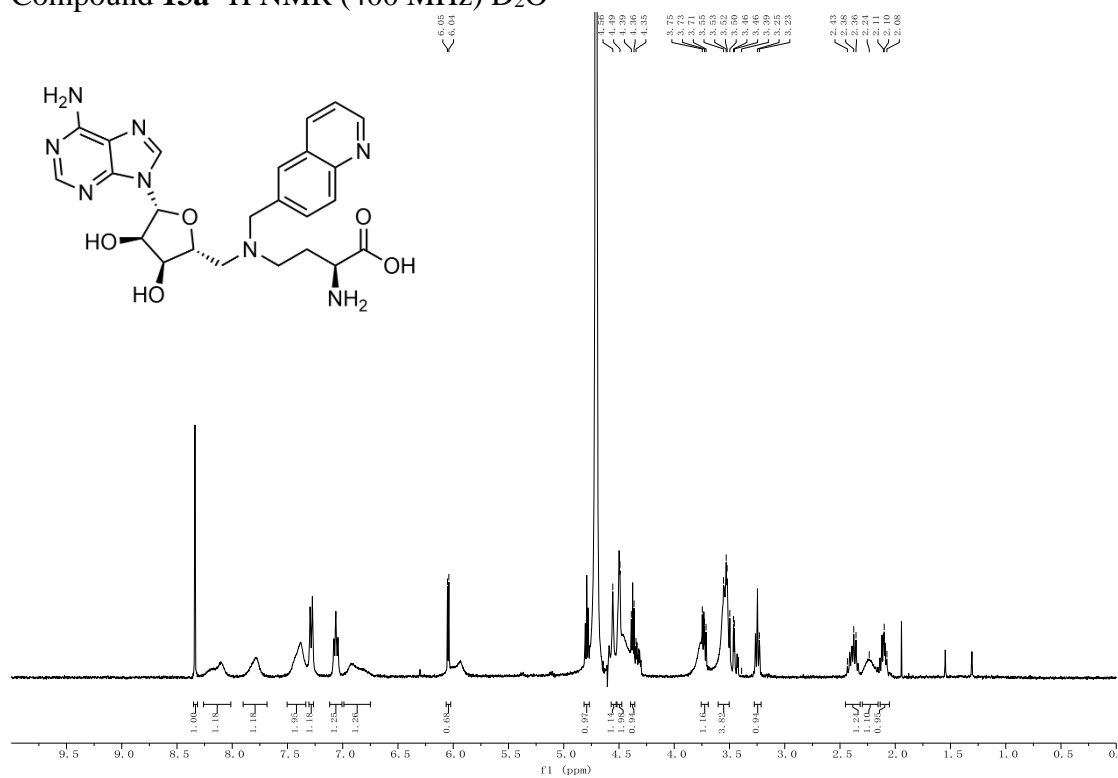

$^{13}\text{C}$  NMR (101 MHz)  $\text{D}_2\text{O}$

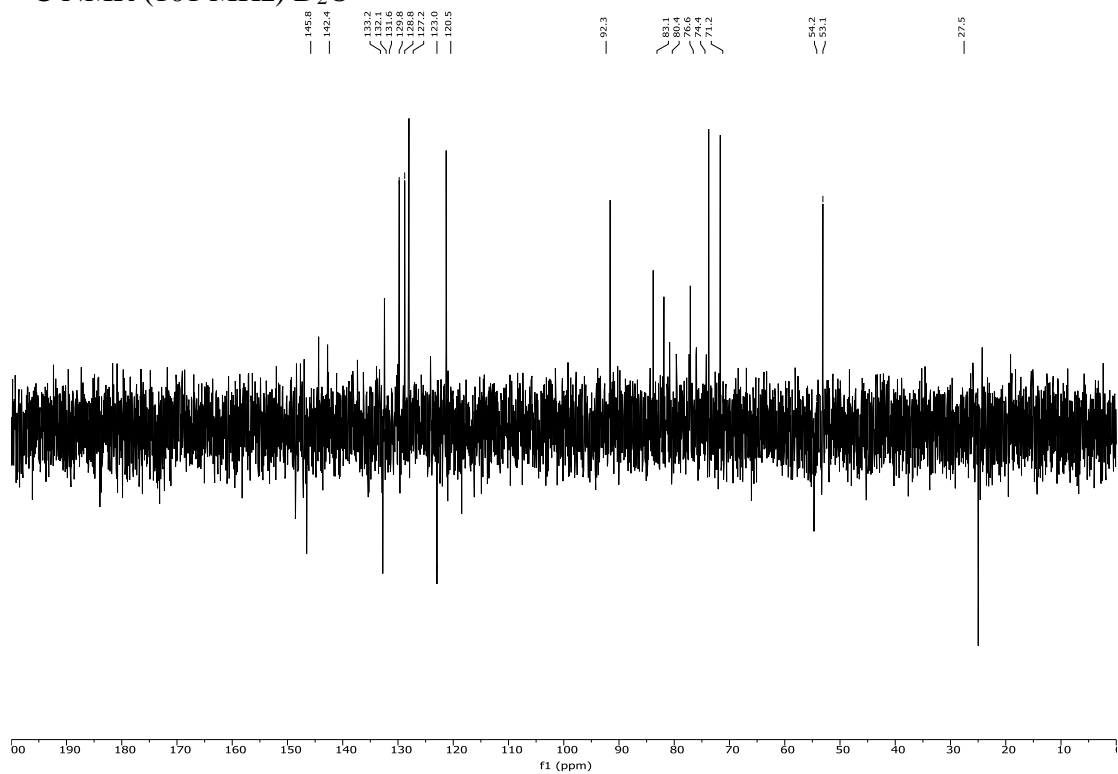

Compound **13b**  $^1\text{H}$  NMR (400 MHz)  $\text{D}_2\text{O}$

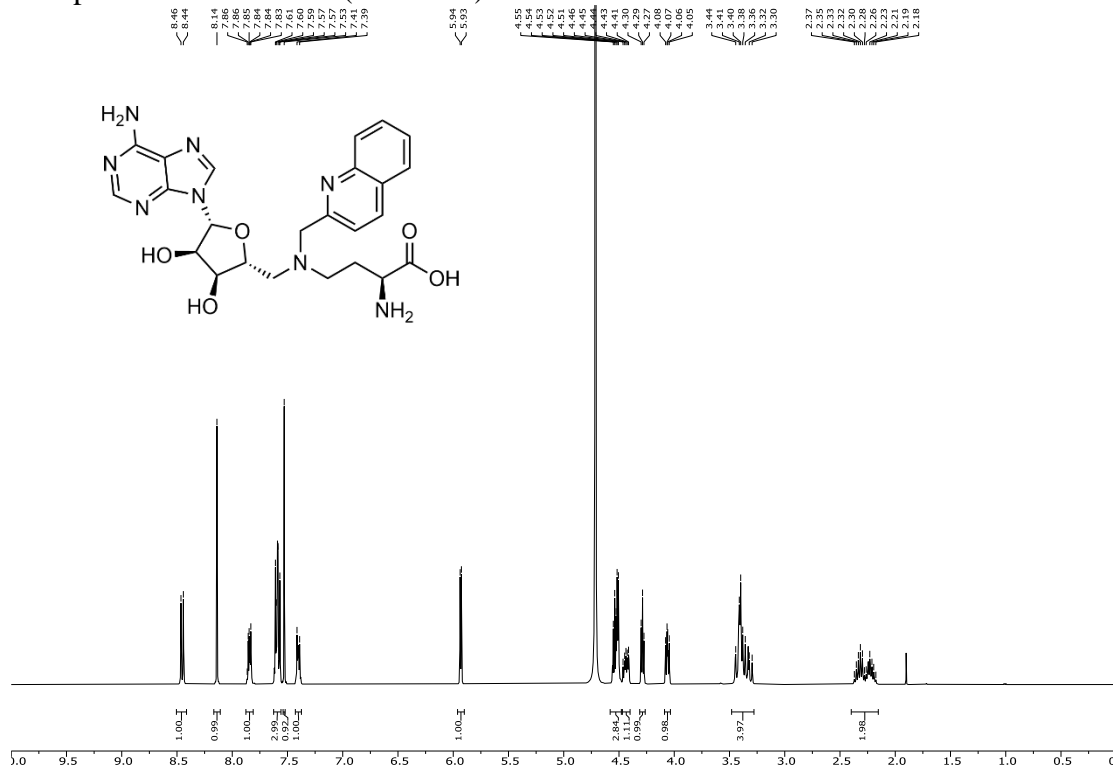

$^{13}\text{C}$  NMR (101 MHz)  $\text{D}_2\text{O}$

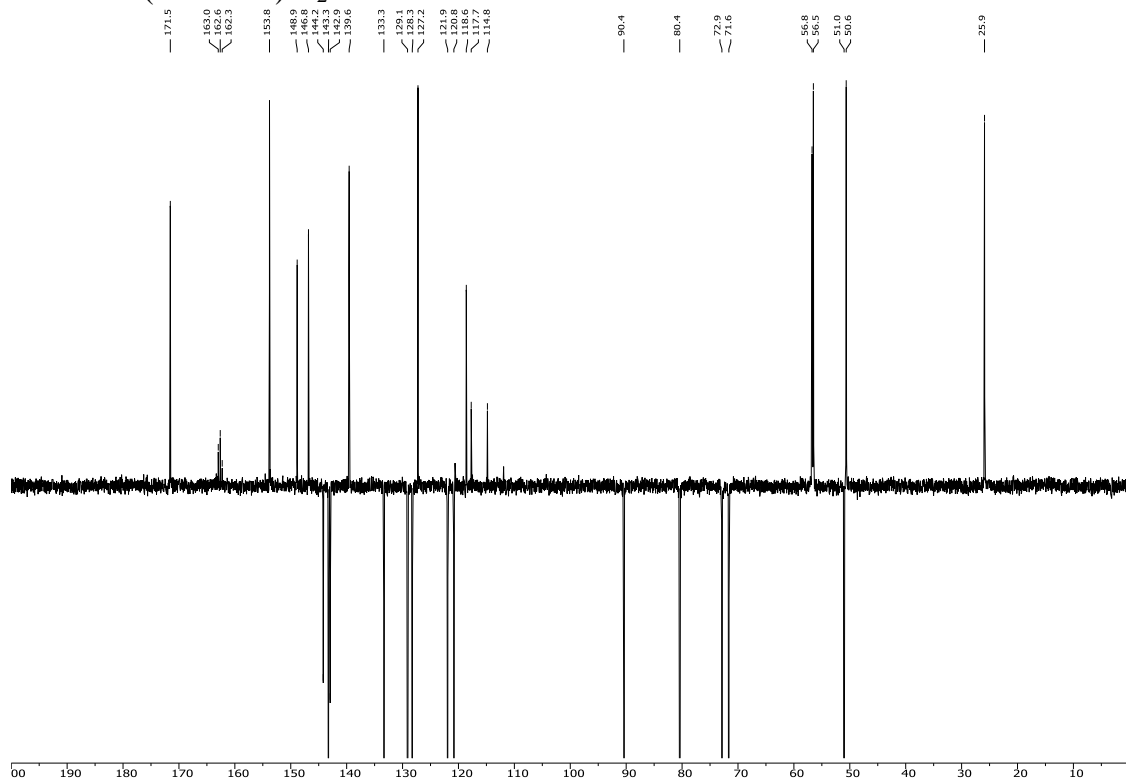



Compound **13c**  $^1\text{H}$  NMR (400 MHz)  $\text{D}_2\text{O}$

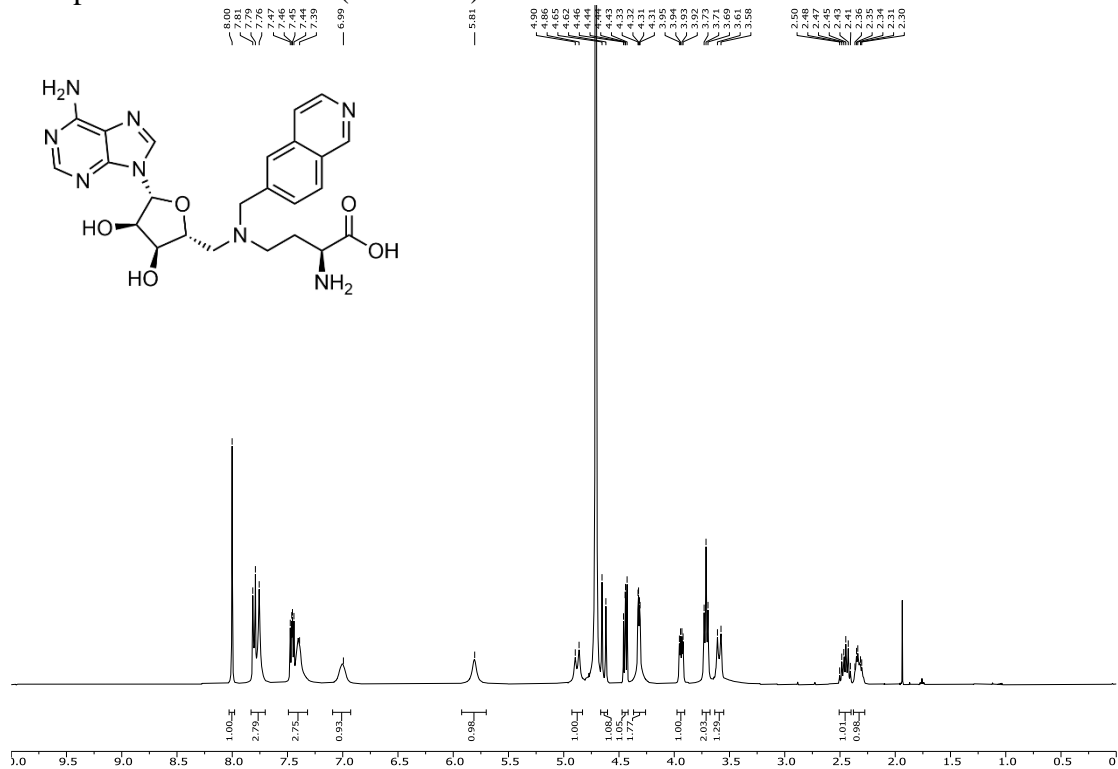

$^{13}\text{C}$  NMR (101 MHz)  $\text{D}_2\text{O}$

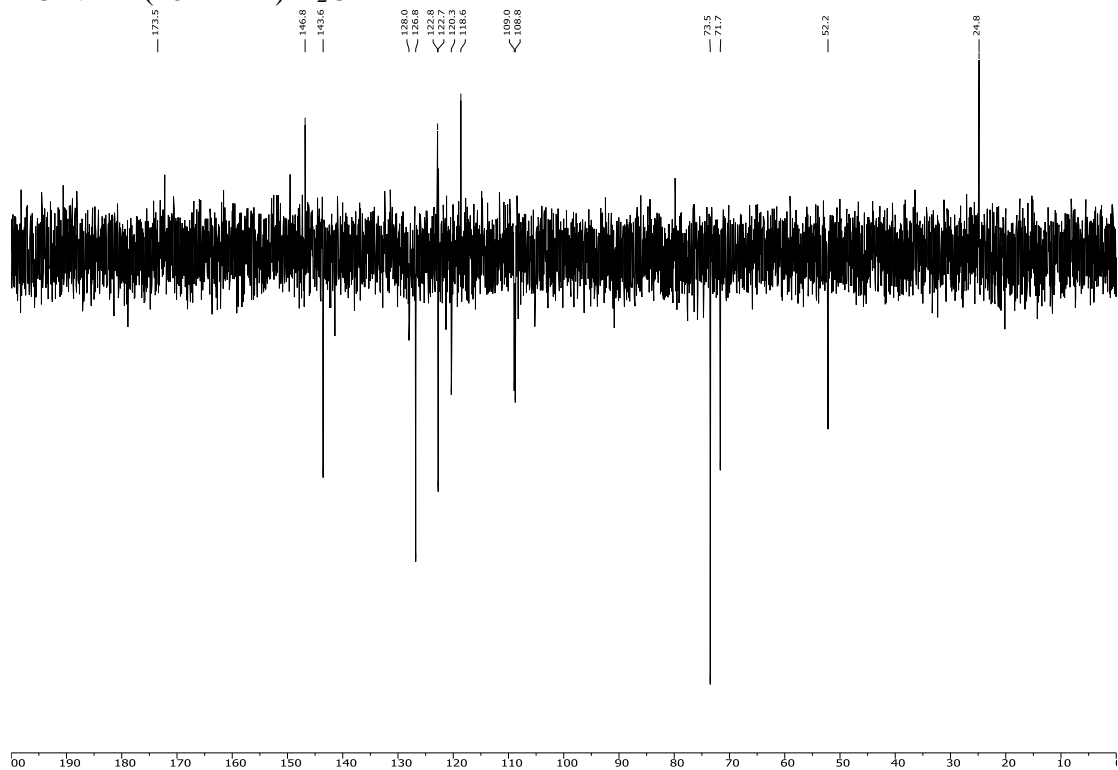

Compound **13d**  $^1\text{H}$  NMR (400 MHz)  $\text{D}_2\text{O}$

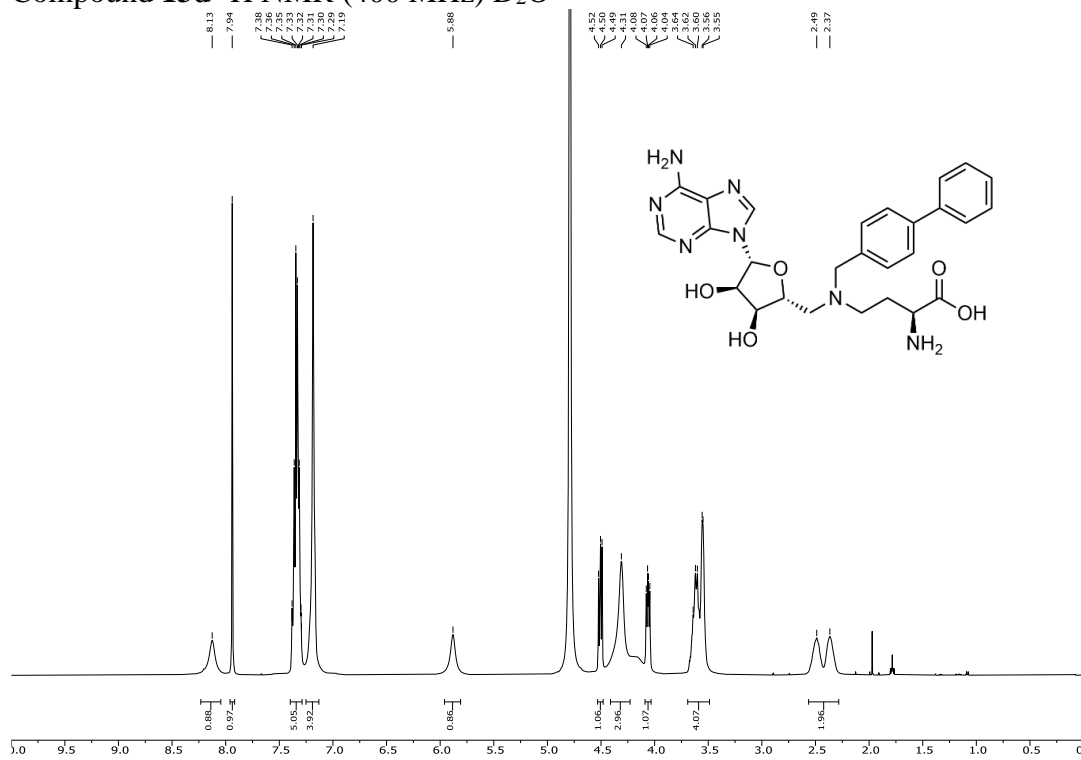

$^{13}\text{C}$  NMR (101MHz)  $\text{D}_2\text{O}$

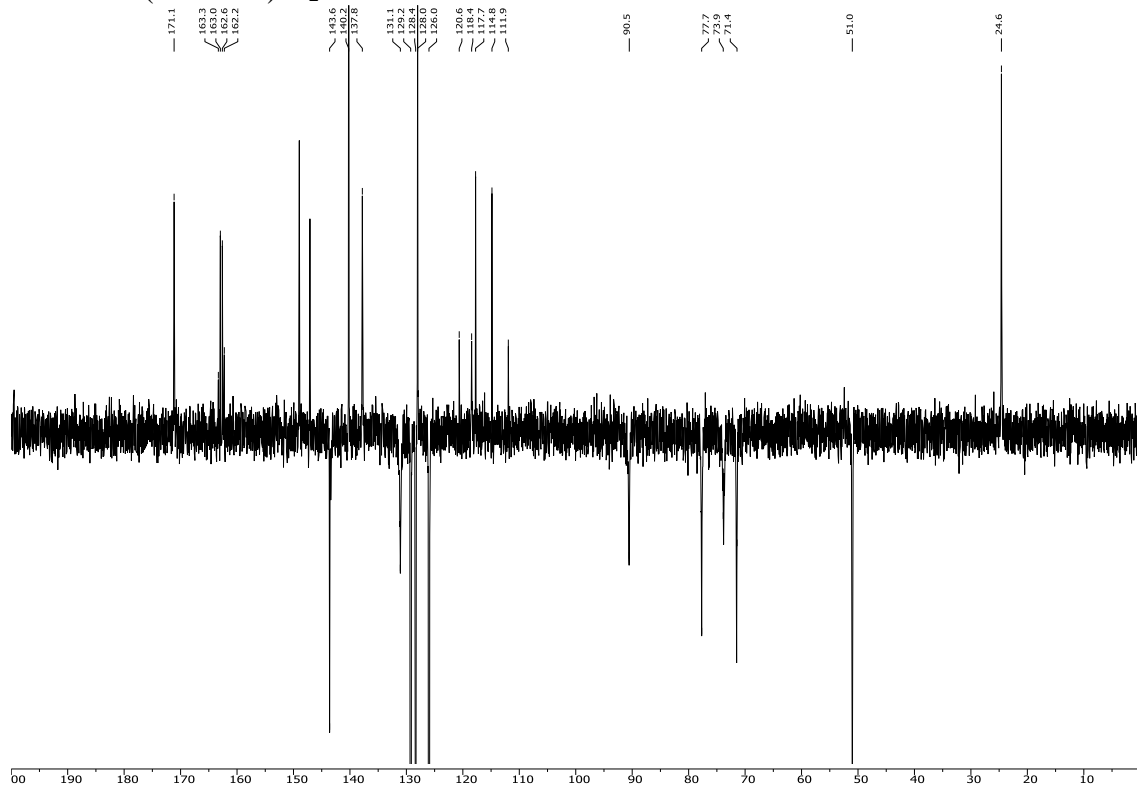

Compound **13e**  $^1\text{H}$ NMR (400 MHz)  $\text{D}_2\text{O}$

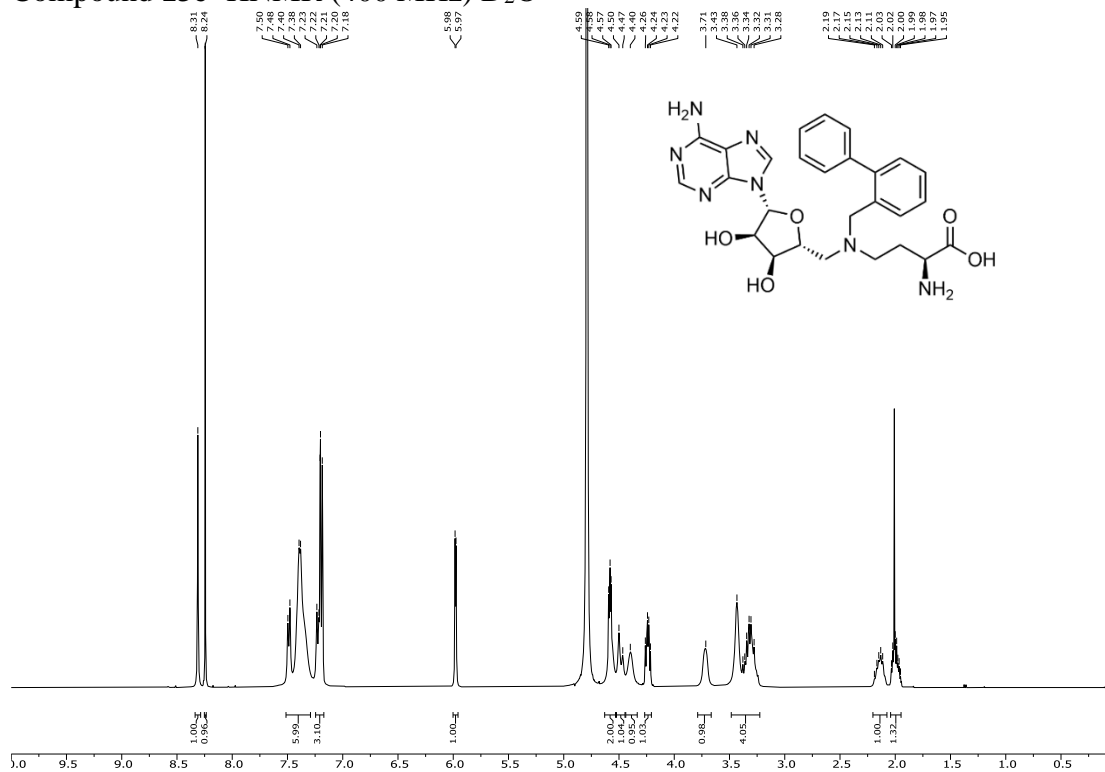

$^{13}\text{C}$ NMR (101MHz)  $\text{D}_2\text{O}$

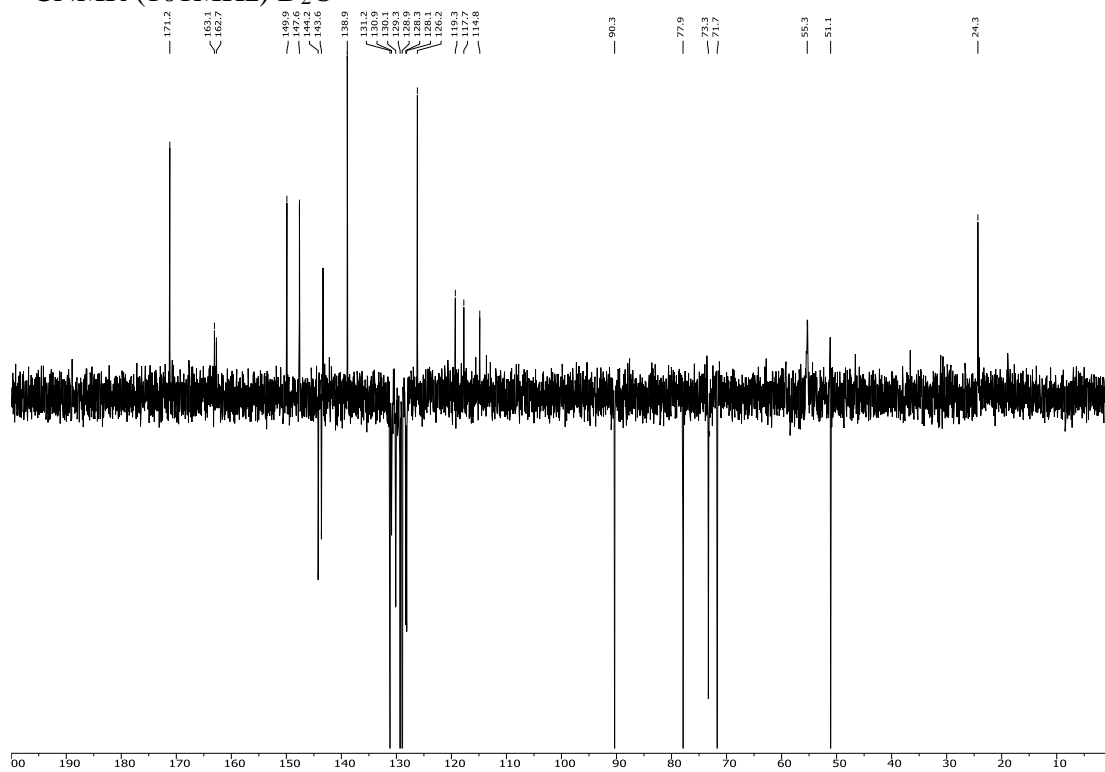

Compound **13f**  $^1\text{H}$  NMR (400 MHz)  $\text{D}_2\text{O}$

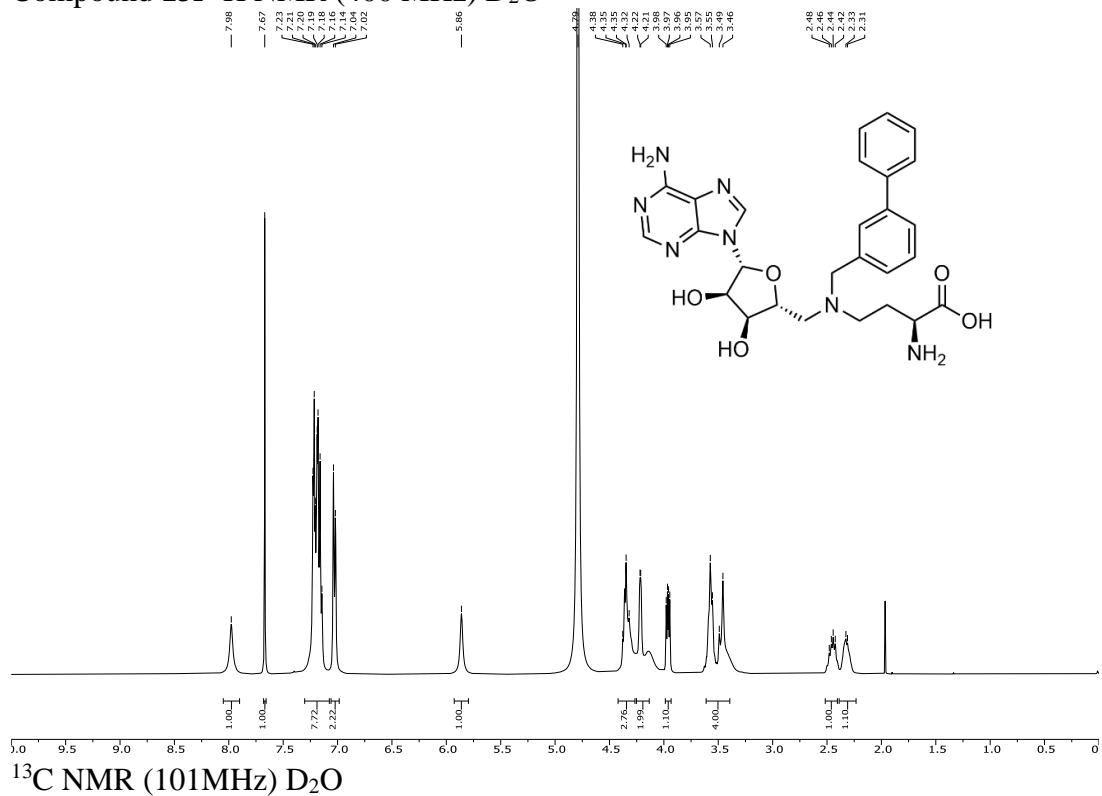

$^{13}\text{C}$  NMR (101MHz)  $\text{D}_2\text{O}$

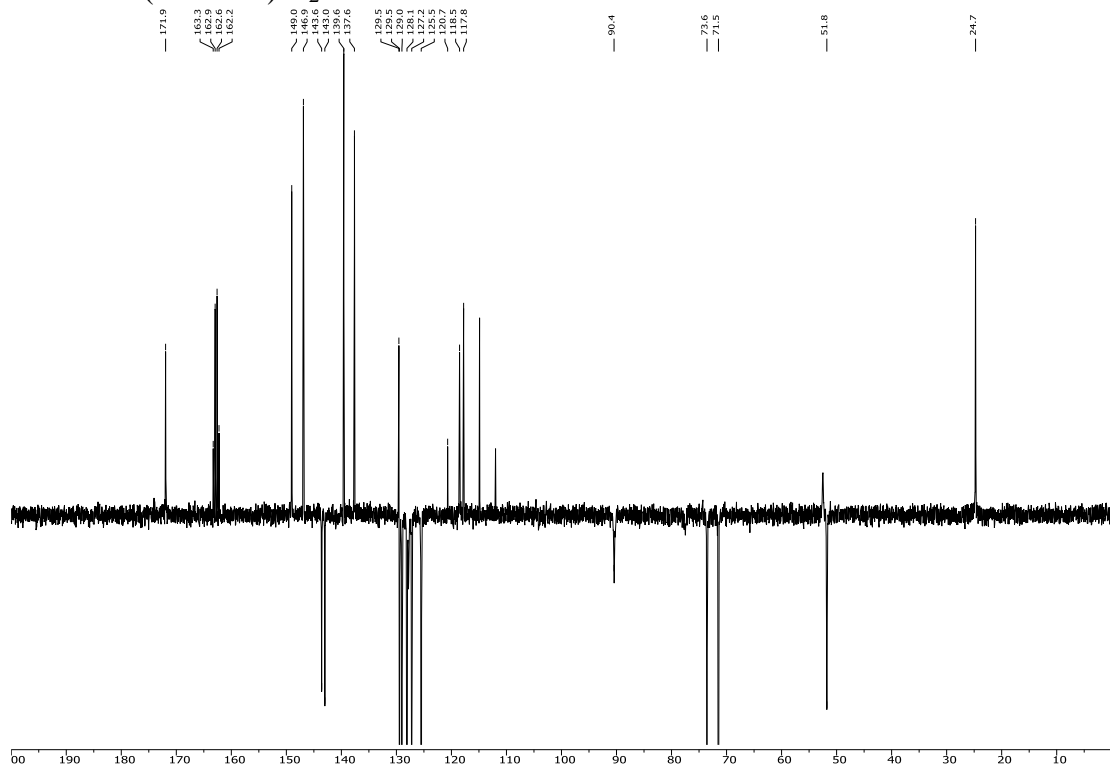

Compound **13g**  $^1\text{H}$  NMR (400 MHz)  $\text{D}_2\text{O}$

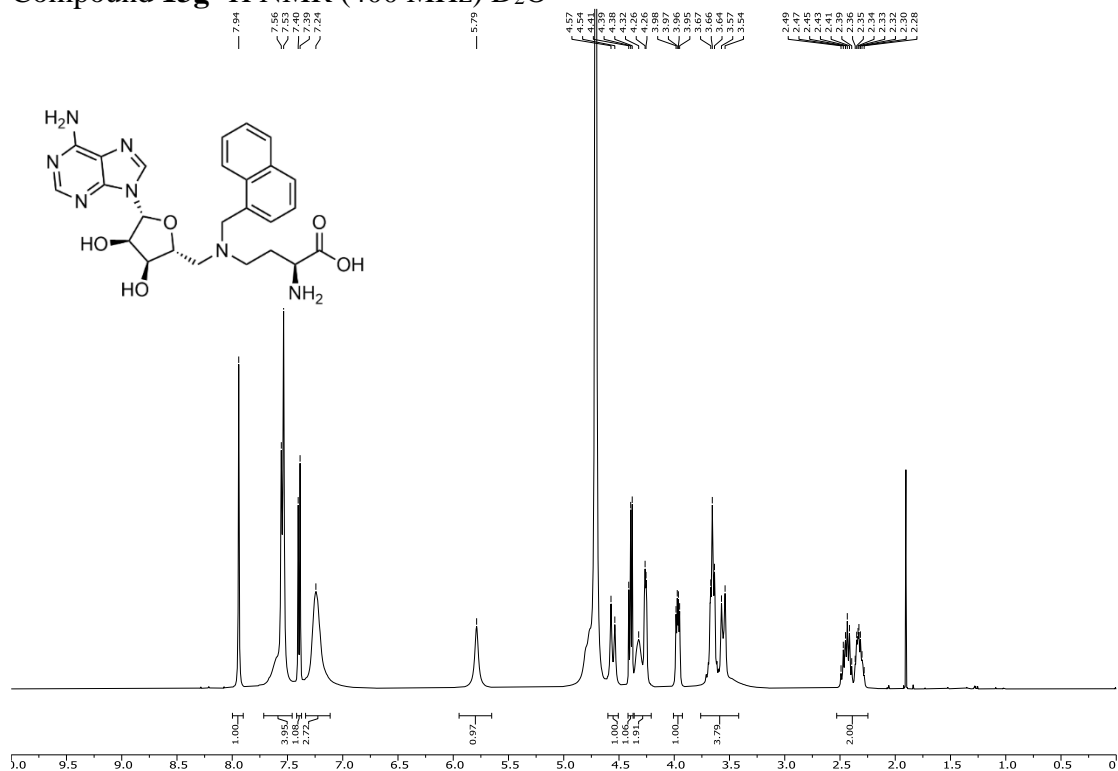

$^{13}\text{C}$  NMR (101 MHz)  $\text{D}_2\text{O}$

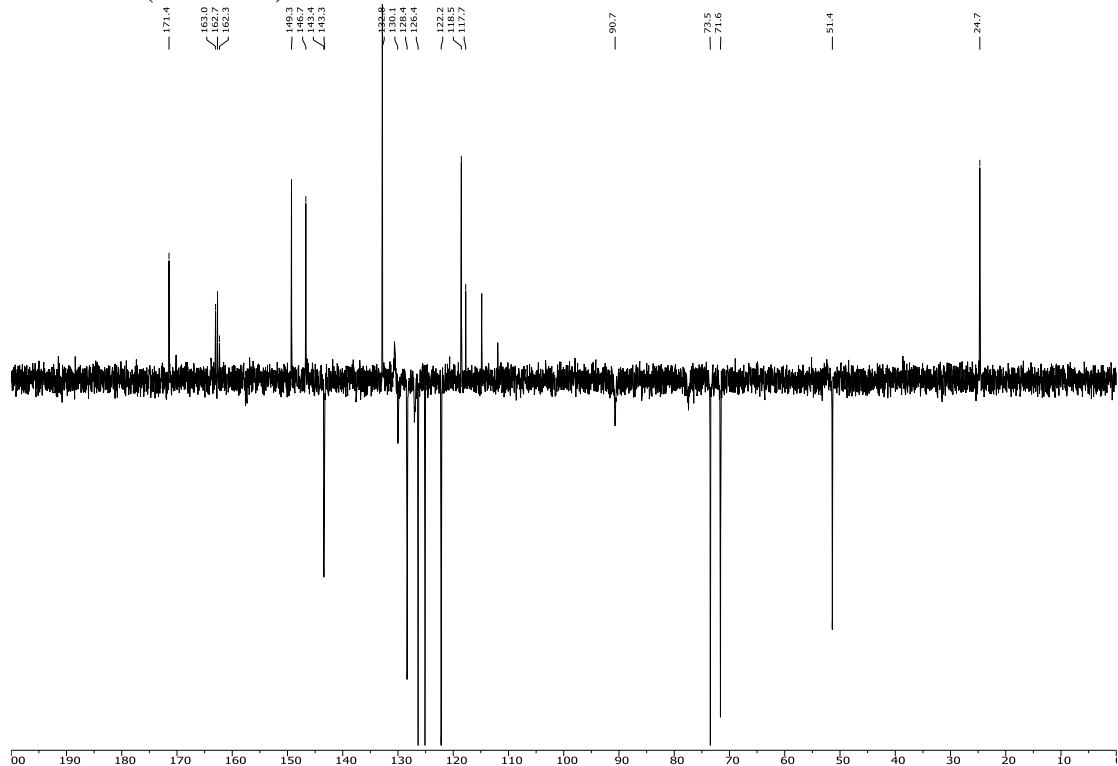

Compound **13h**  $^1\text{H}$  NMR (400 MHz)  $\text{CD}_3\text{OD}$

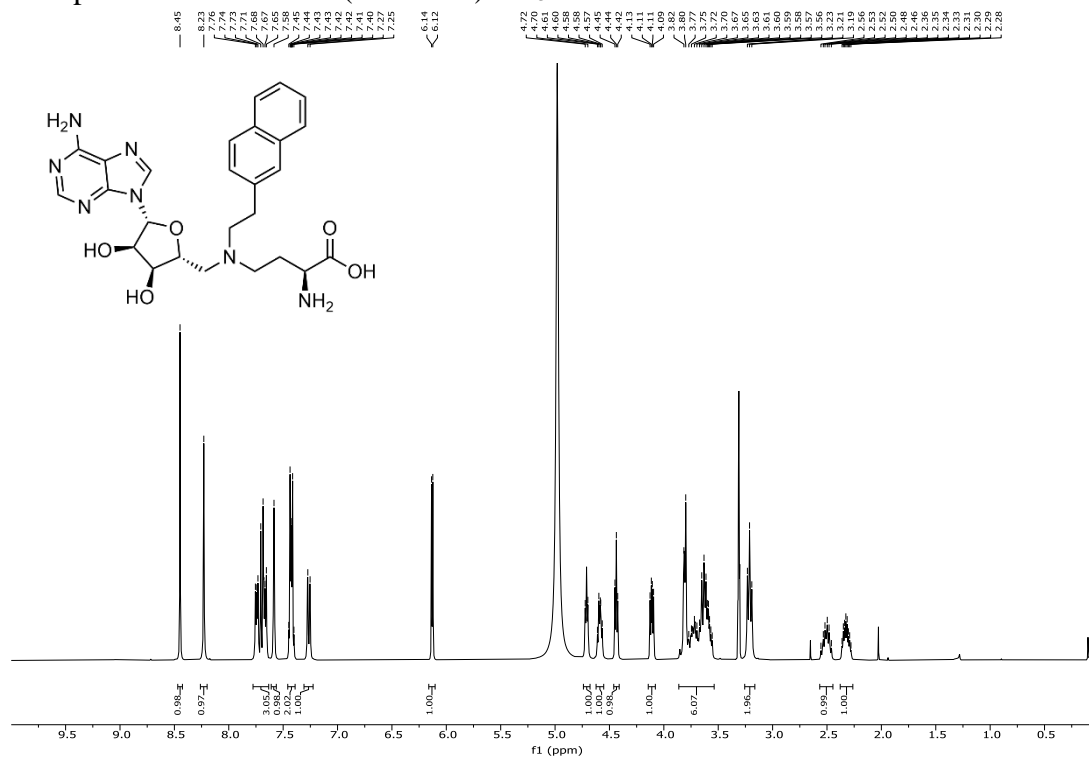

$^{13}\text{C}$  NMR (101 MHz)  $\text{CD}_3\text{OD}$

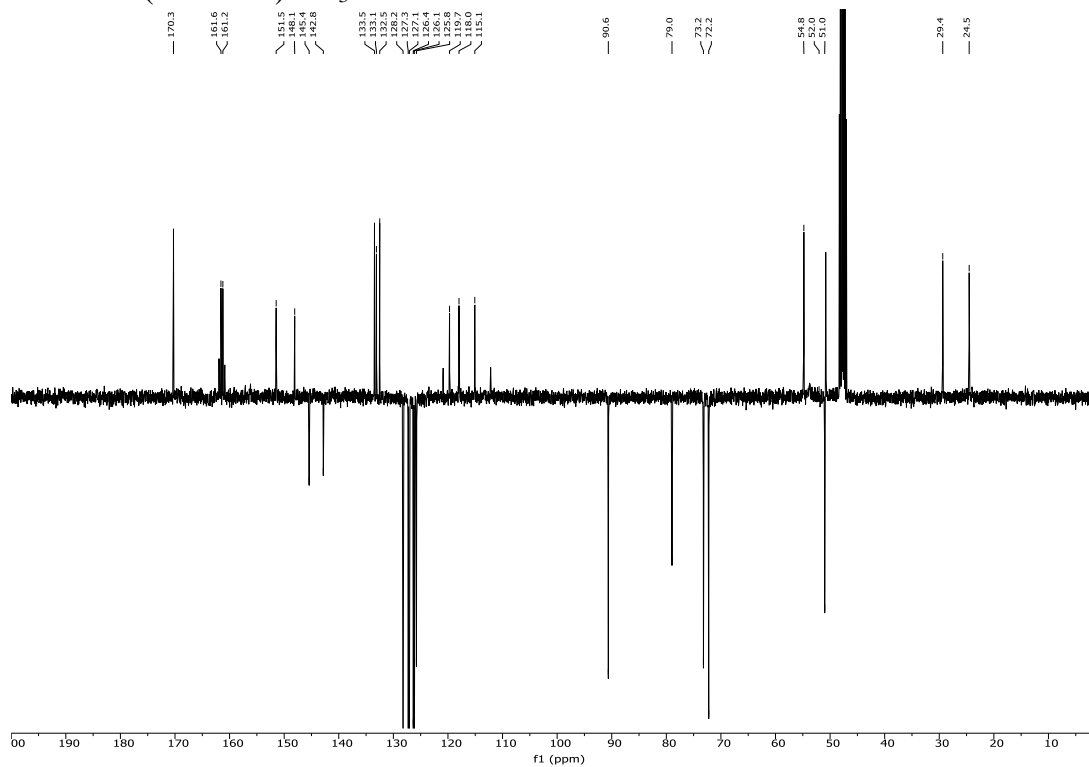

Compound **13i**  $^1\text{H}$  NMR (400 MHz)  $\text{D}_2\text{O}$

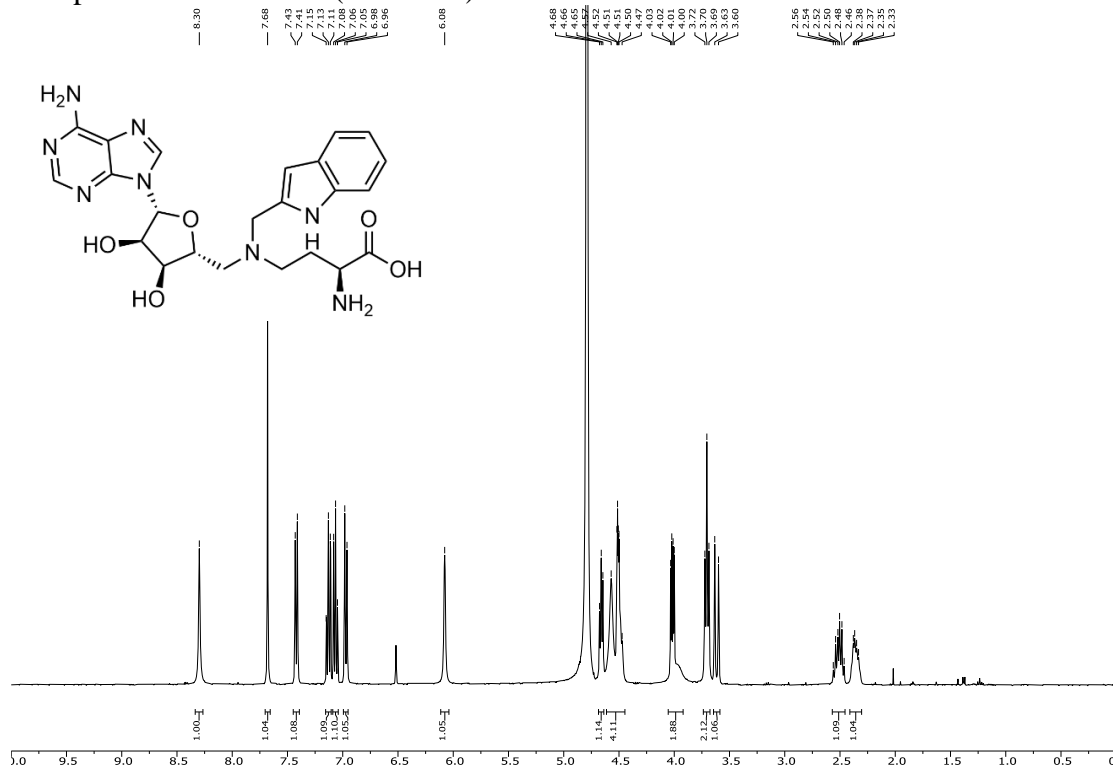

$^{13}\text{C}$  NMR (101 MHz)  $\text{D}_2\text{O}$

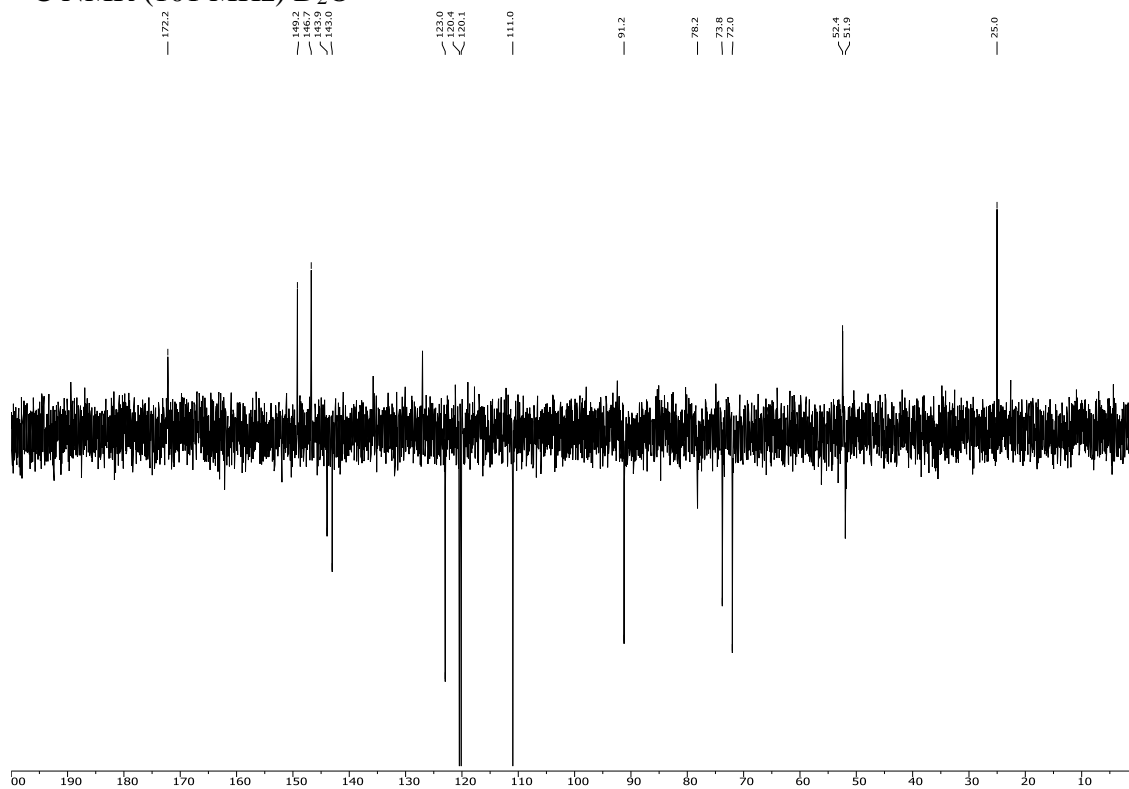

Compound **13j**  $^1\text{H}$  NMR (500 MHz)  $\text{CD}_3\text{OD}$

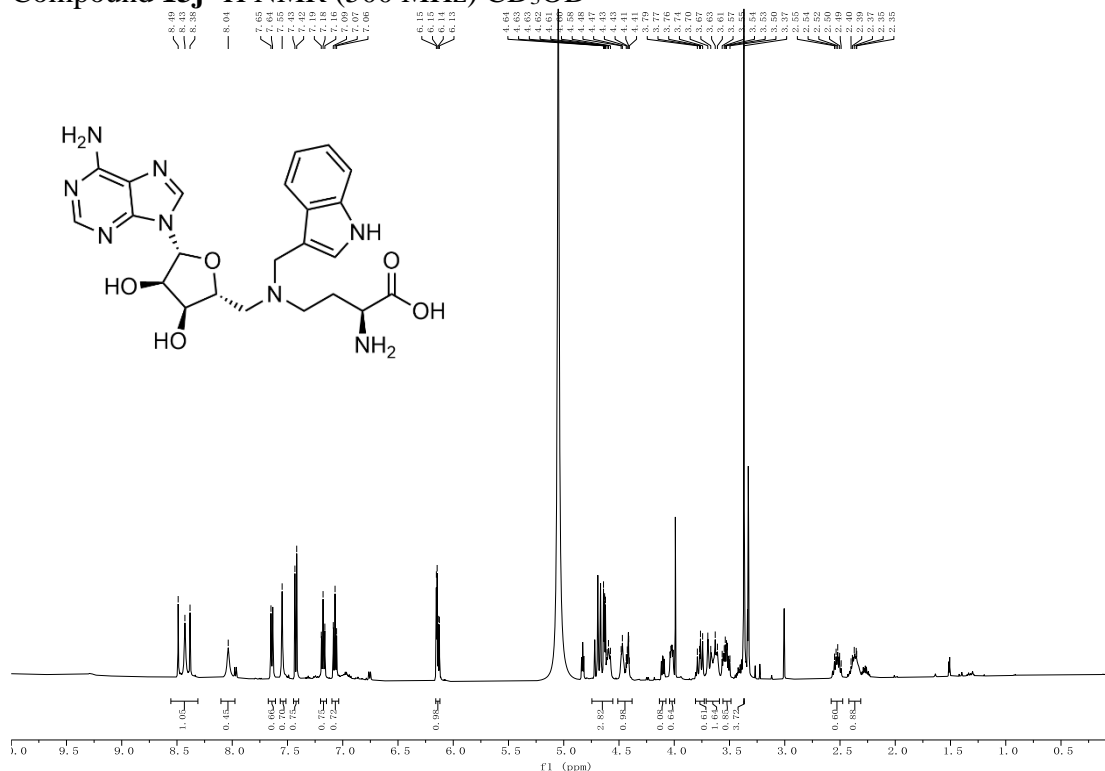

$^{13}\text{C}$  NMR (126 MHz)  $\text{CD}_3\text{OD}$

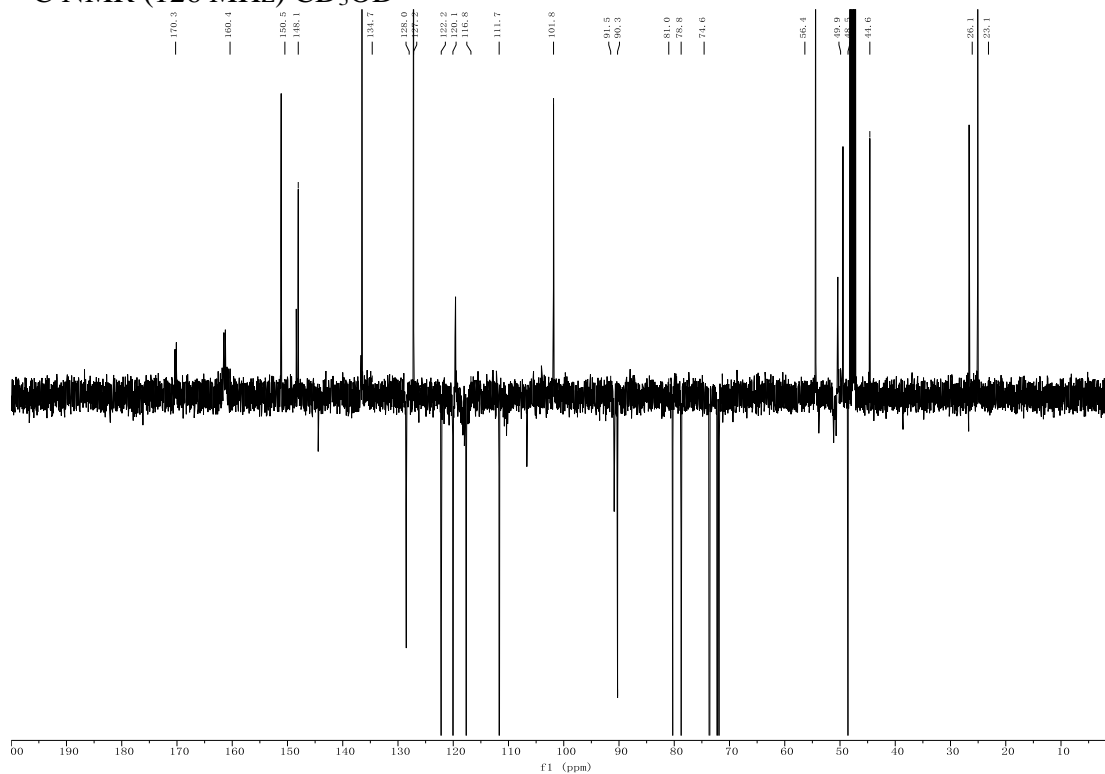



Compound **13k**  $^1\text{H}$  NMR (400 MHz)  $\text{D}_2\text{O}$

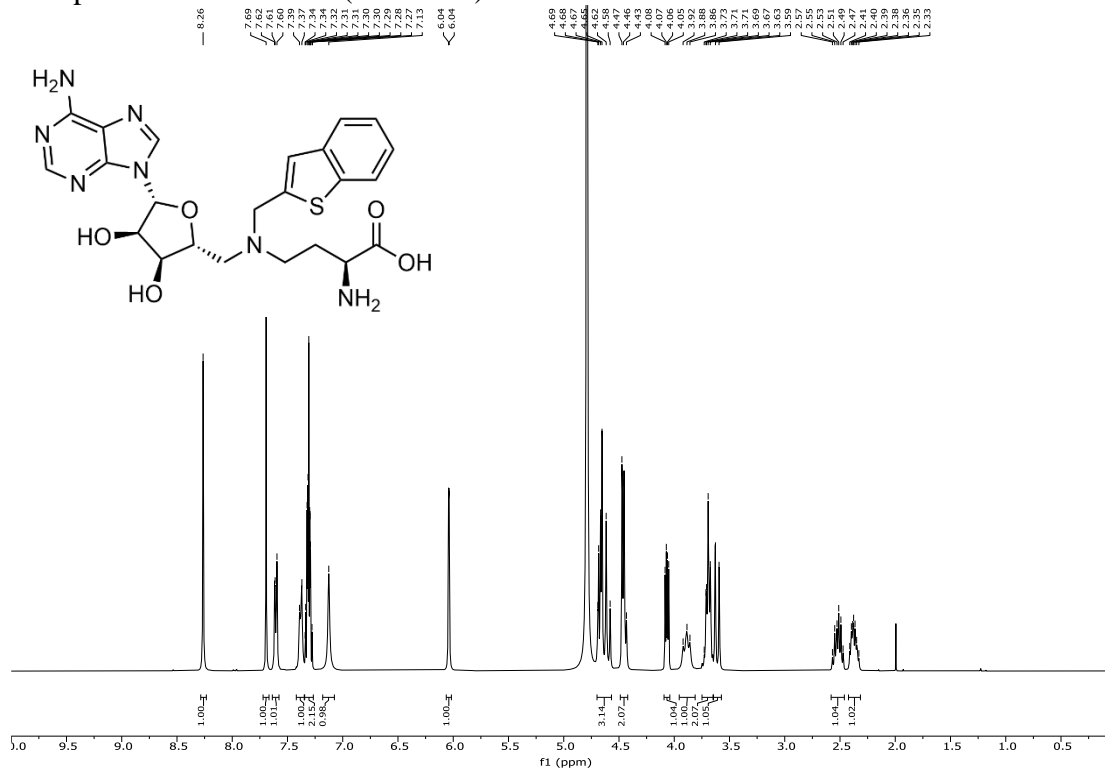

$^{13}\text{C}$  NMR (101 MHz)  $\text{D}_2\text{O}$

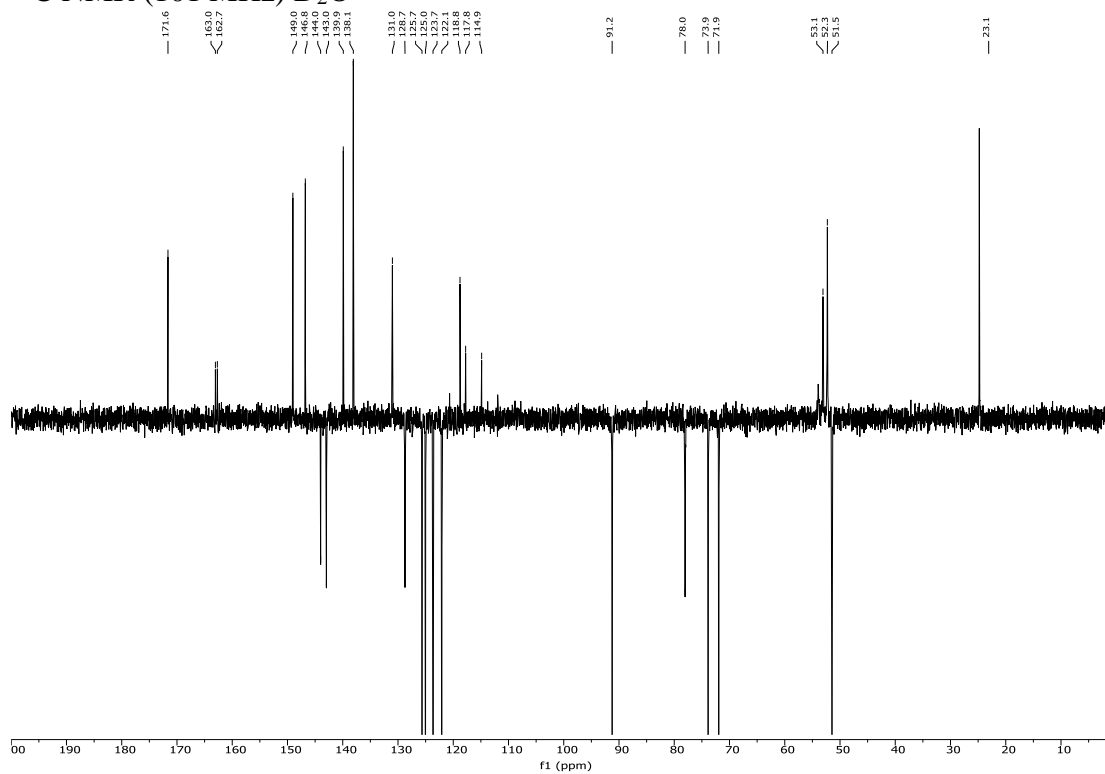

Compound **131**  $^1\text{H}$  NMR (400 MHz)  $\text{CD}_3\text{OD}$

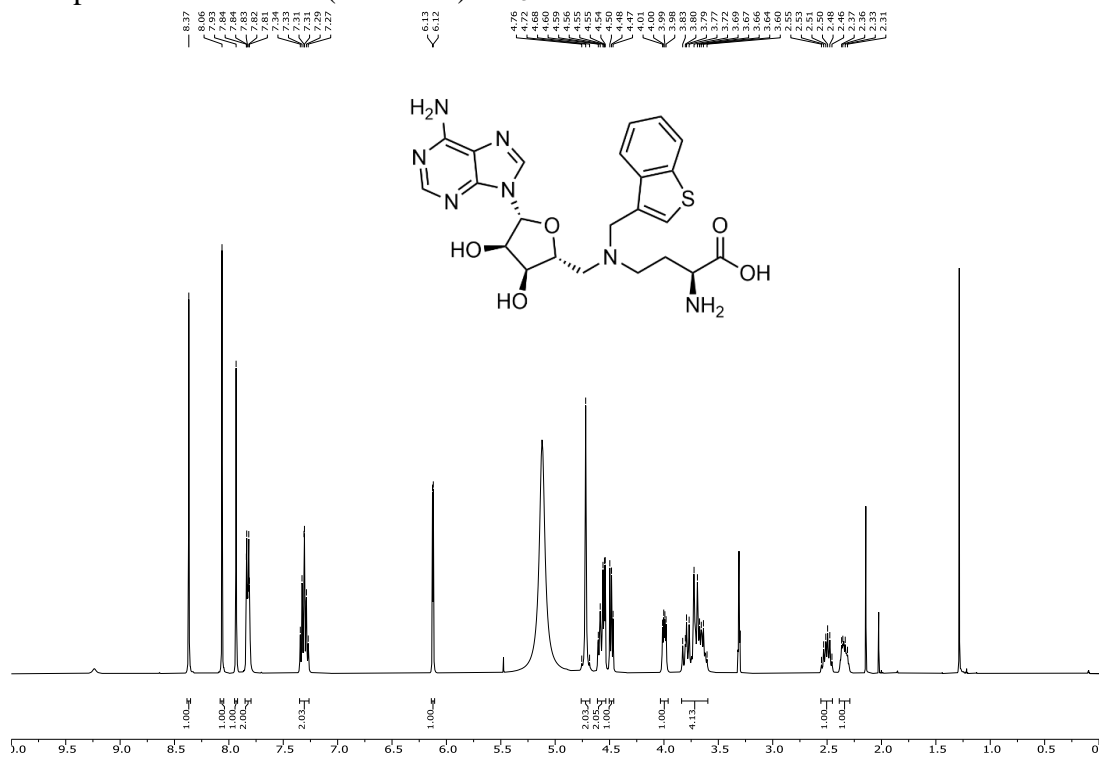

$^{13}\text{C}$  NMR (101 MHz)  $\text{CD}_3\text{OD}$

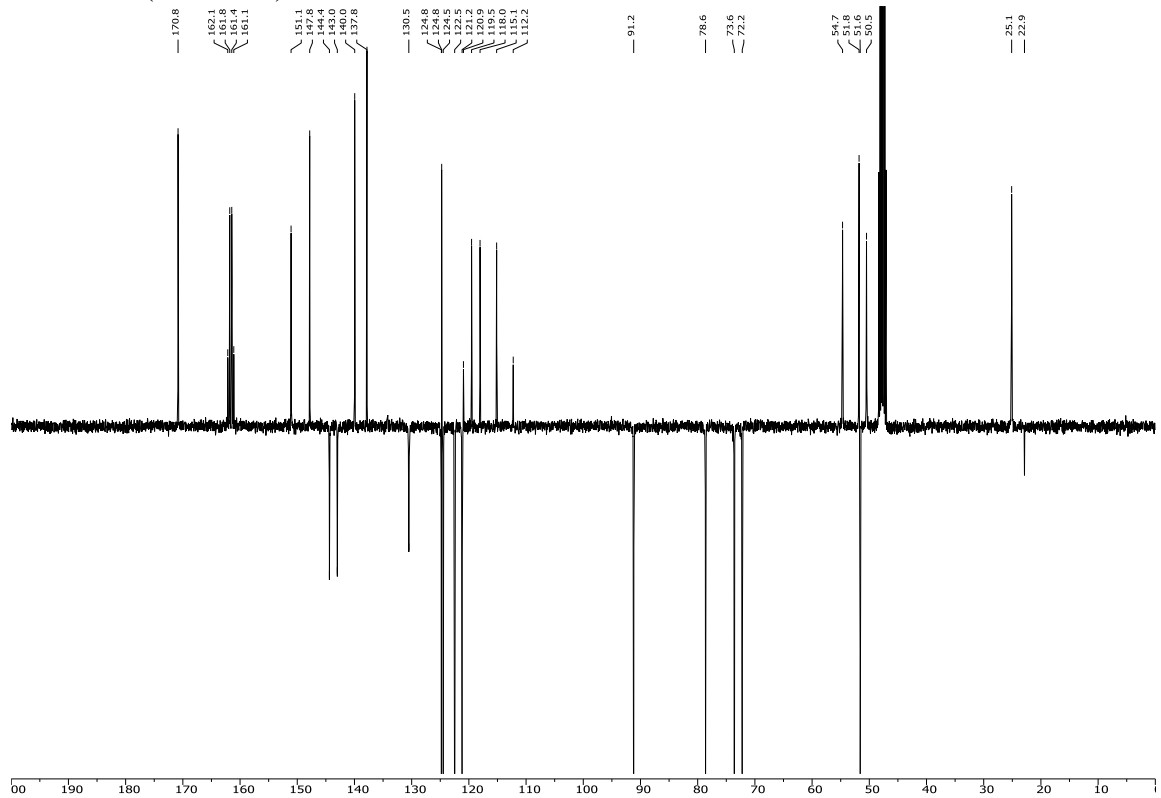

Compound **14y**  $^1\text{H}$  NMR (400 MHz)  $\text{CDCl}_3$

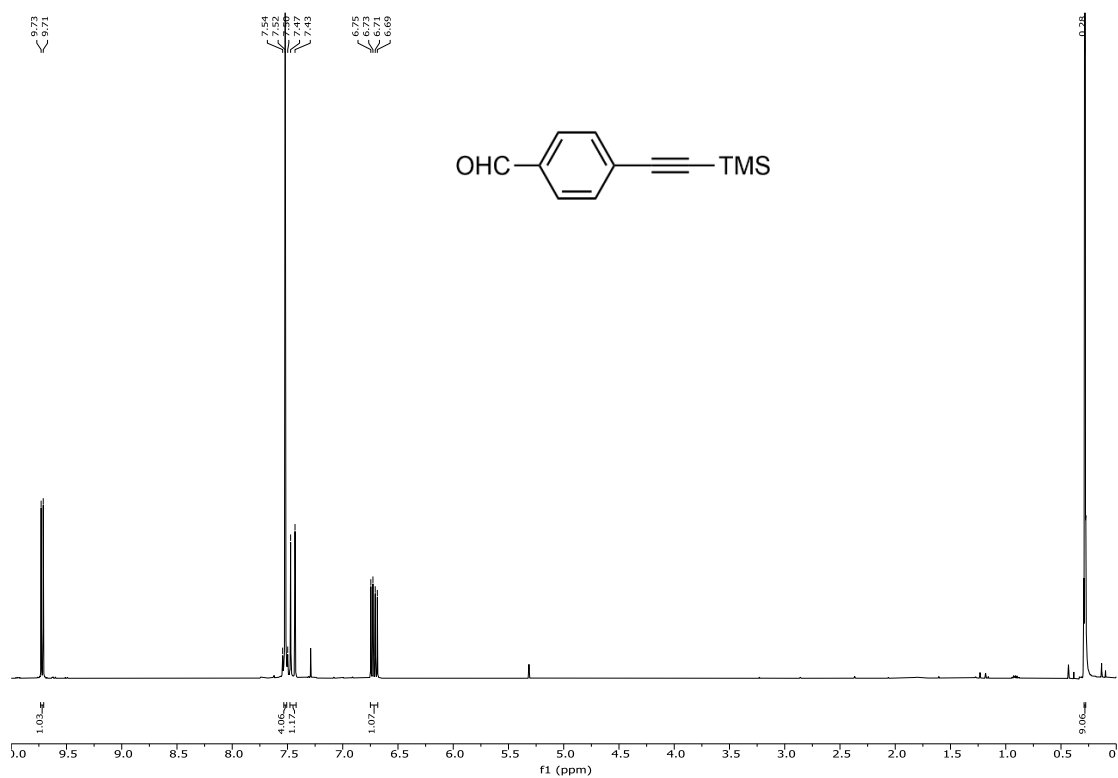

$^{13}\text{C}$  NMR (101 MHz)  $\text{CDCl}_3$

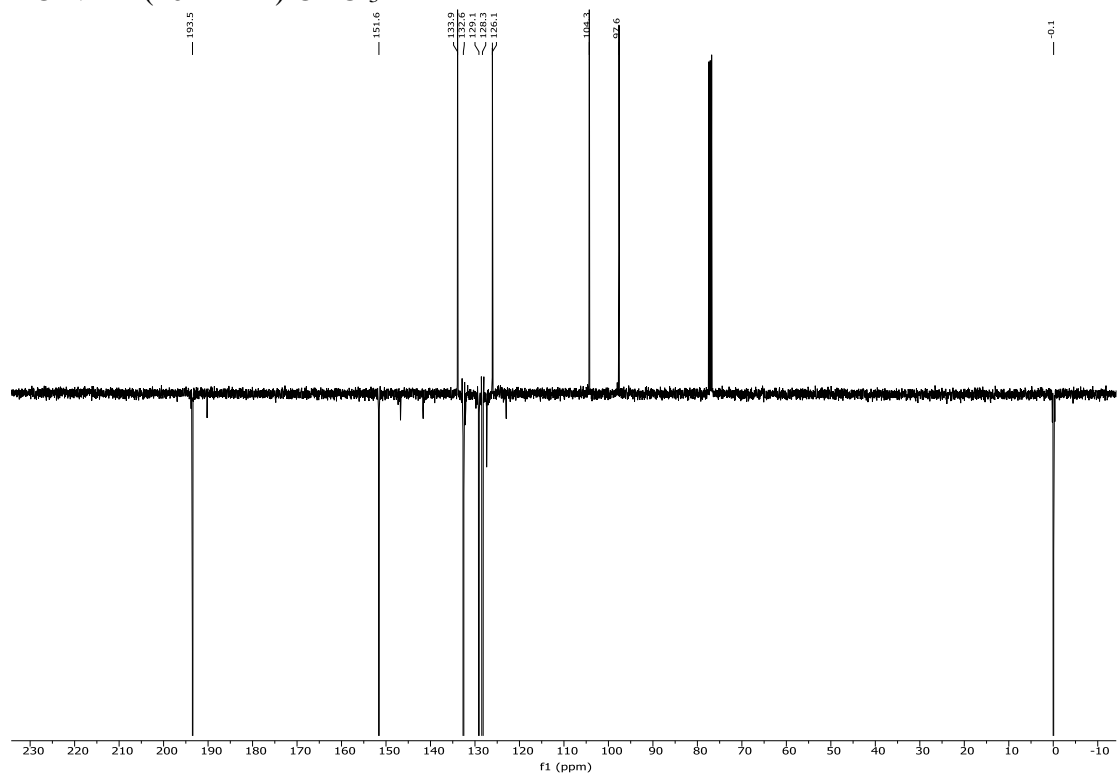

Compound **16a**  $^1\text{H}$  NMR (400 MHz)  $\text{CDCl}_3$

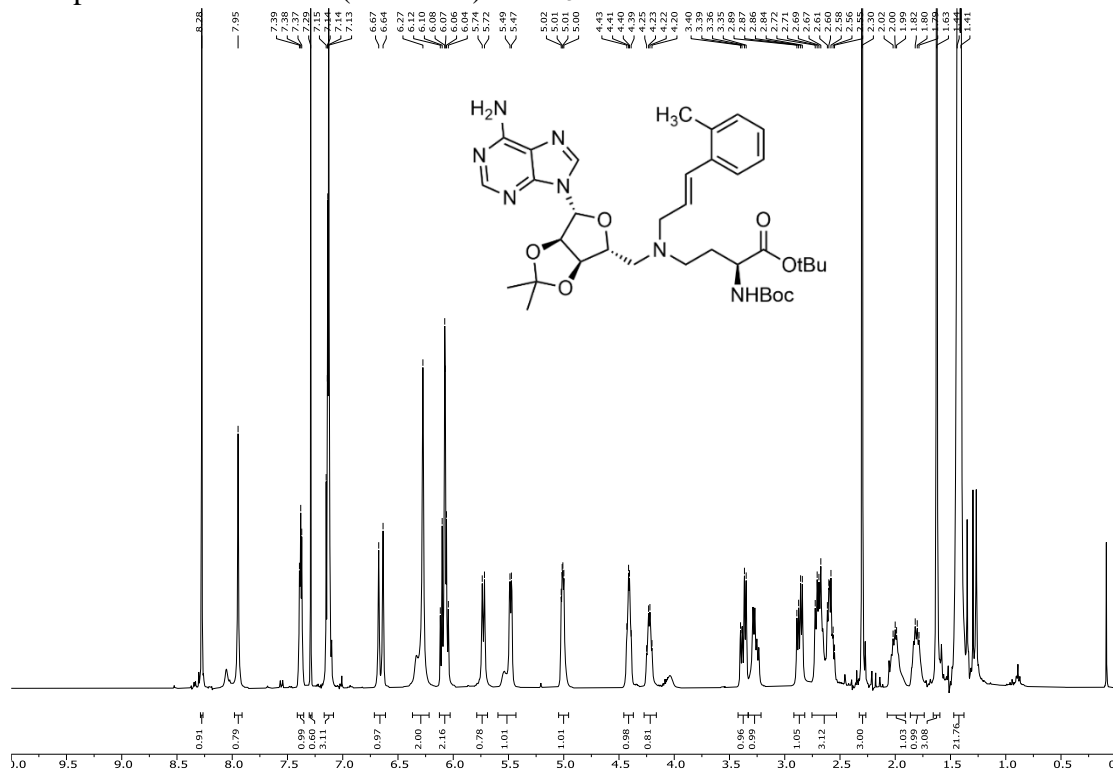

$^{13}\text{C}$  NMR (101 MHz)  $\text{CDCl}_3$

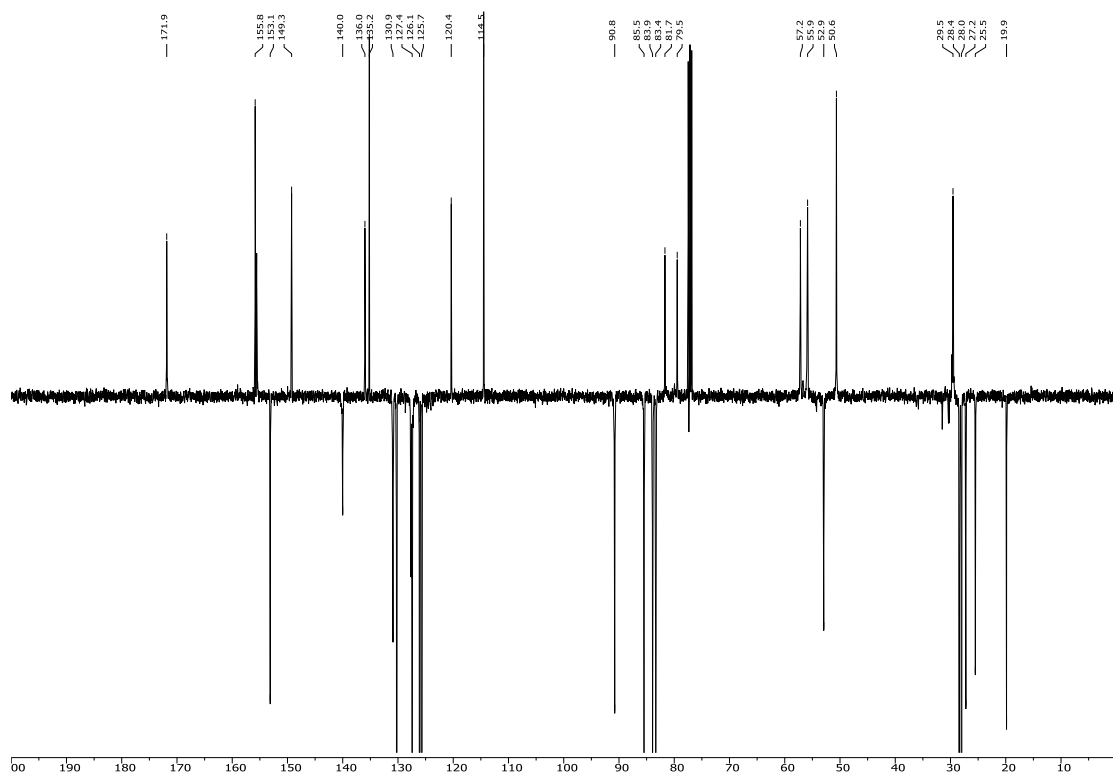

Compound **16b**  $^1\text{H}$  NMR (400 MHz)  $\text{CDCl}_3$

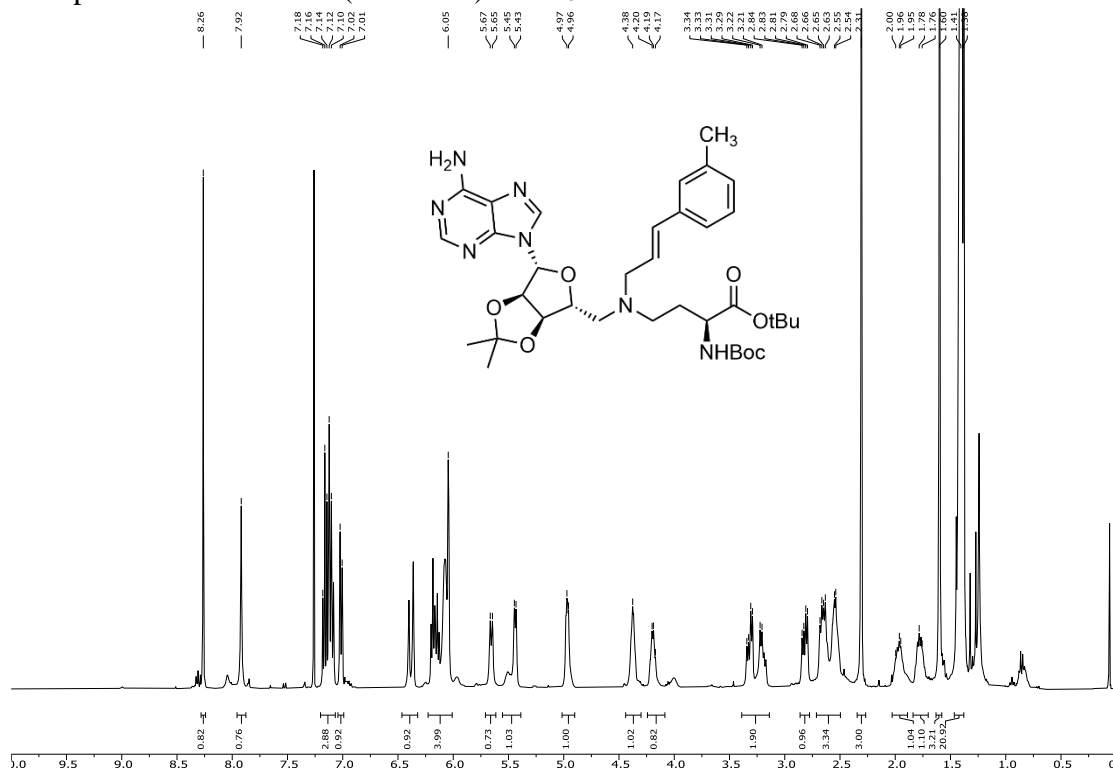

$^{13}\text{C}$  NMR (101 MHz)  $\text{CDCl}_3$

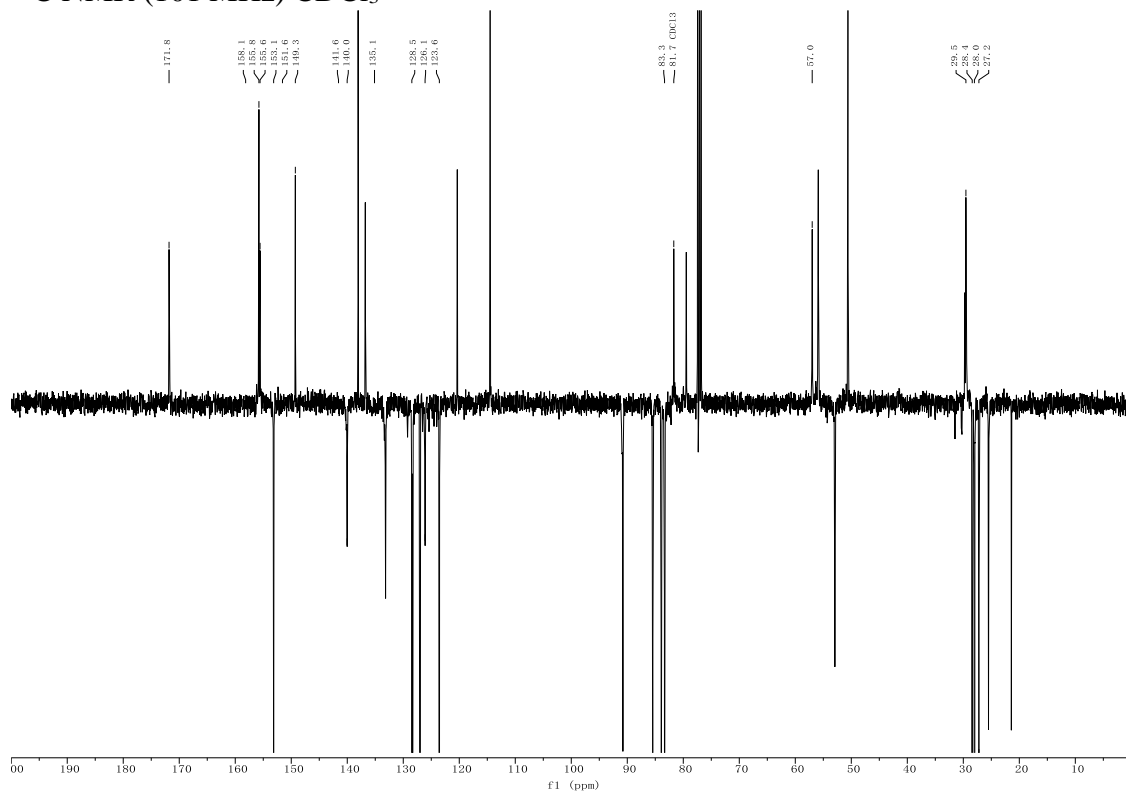

Compound **16c**  $^1\text{H}$  NMR (400 MHz)  $\text{CDCl}_3$

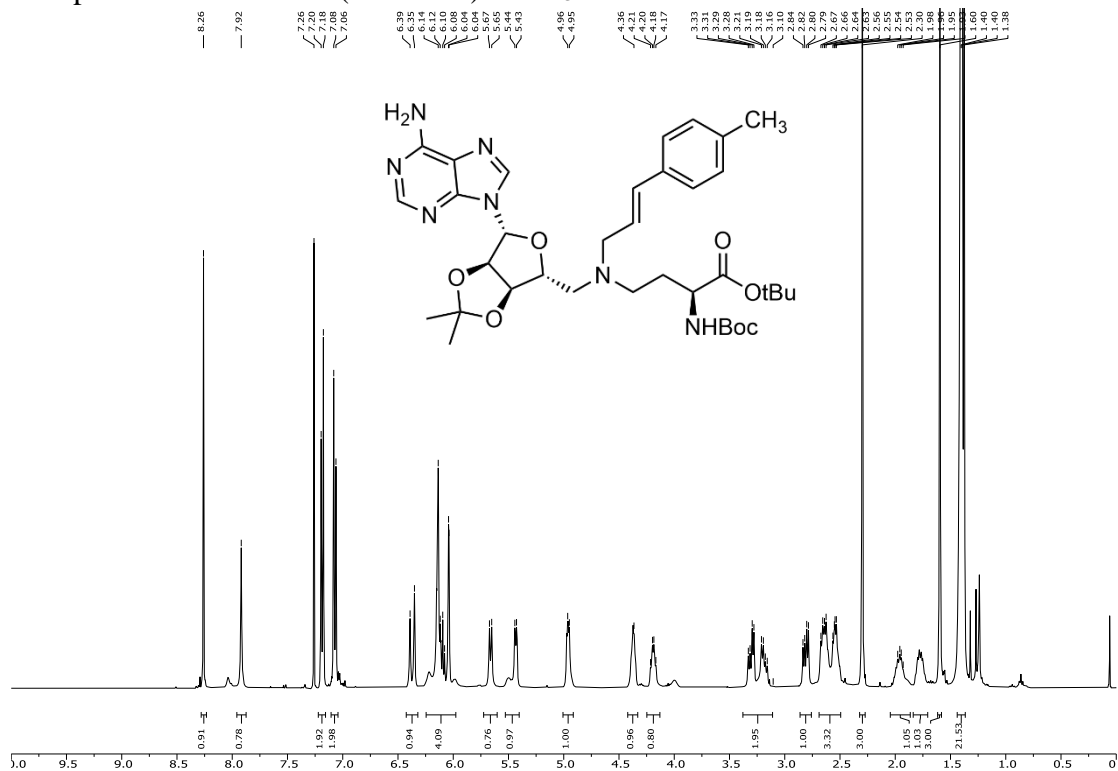

$^{13}\text{C}$  NMR (101 MHz)  $\text{CDCl}_3$

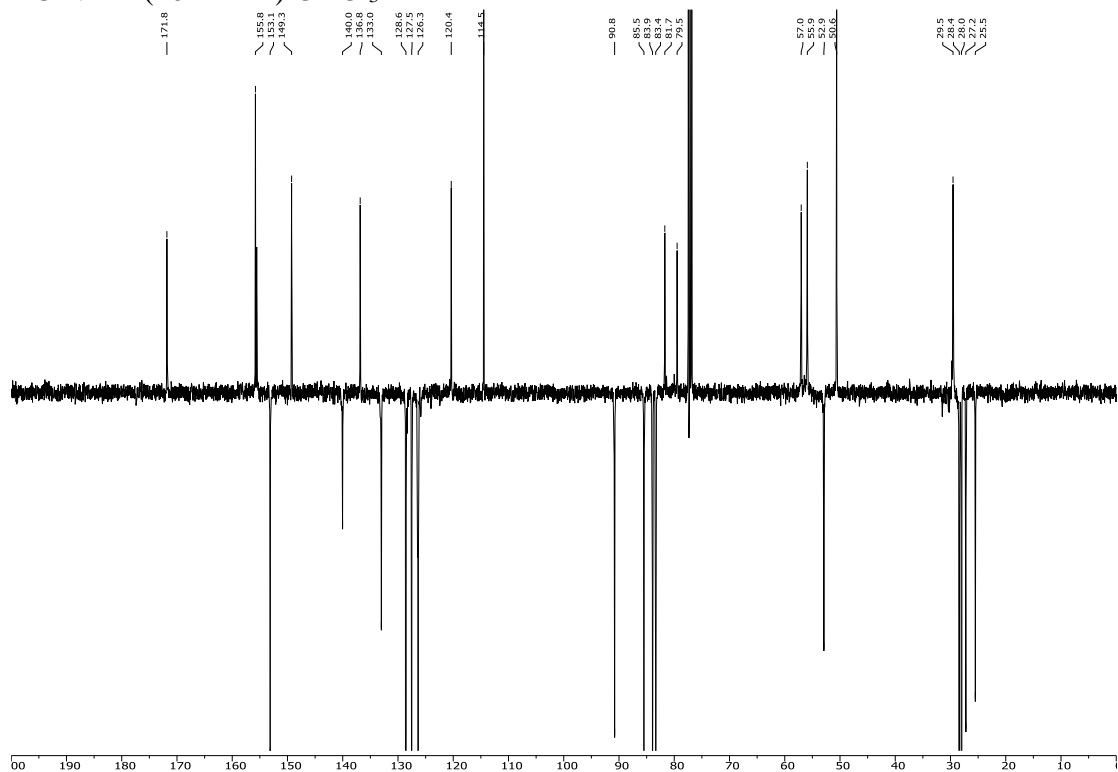

Compound **16d**  $^1\text{H}$  NMR (400 MHz)  $\text{CDCl}_3$

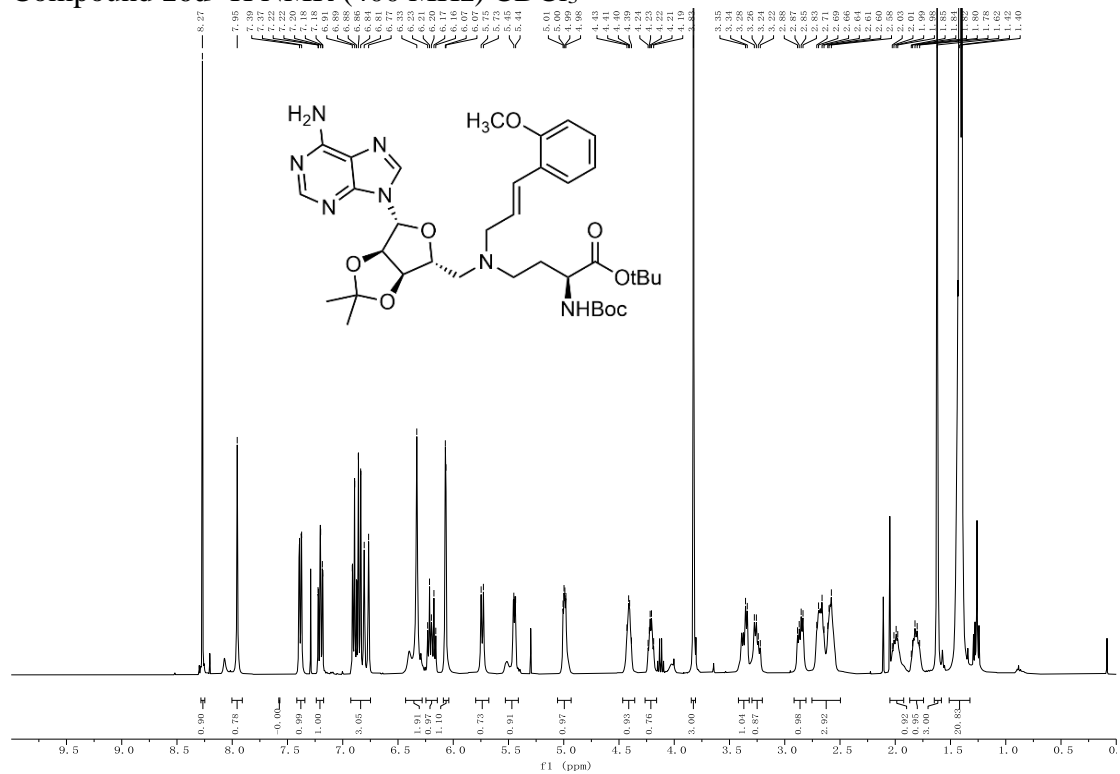

$^{13}\text{C}$  NMR (101 MHz)  $\text{CDCl}_3$

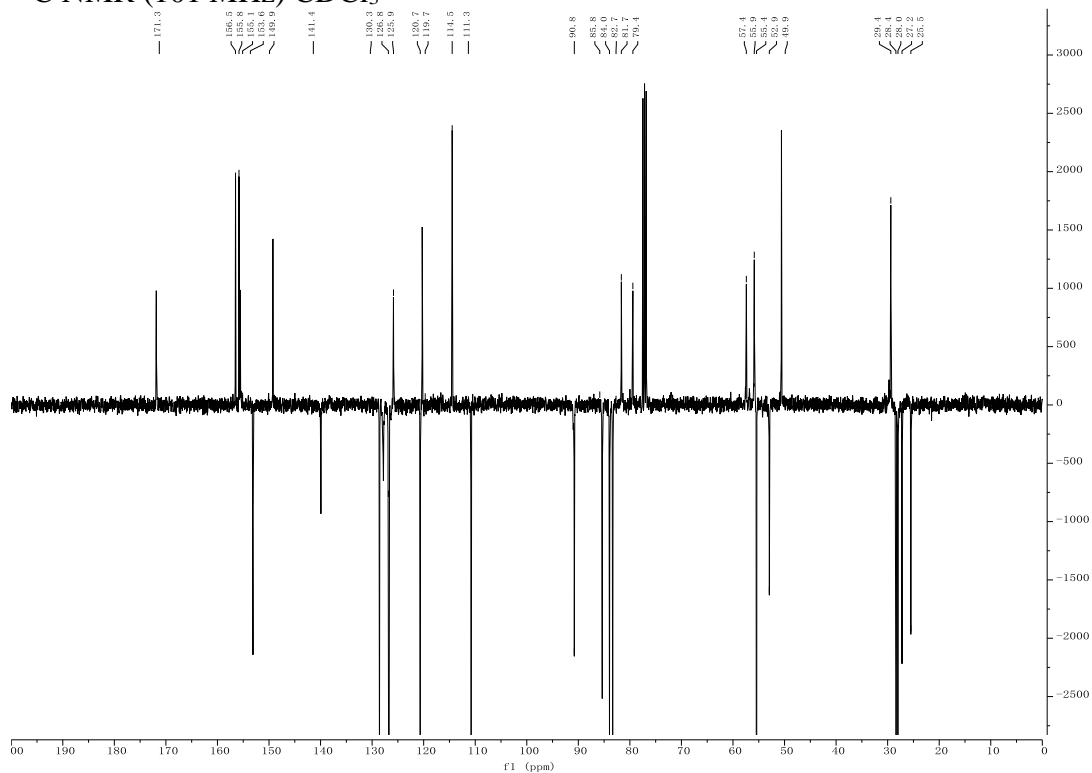

Compound **16e**  $^1\text{H}$  NMR (400 MHz)  $\text{CDCl}_3$

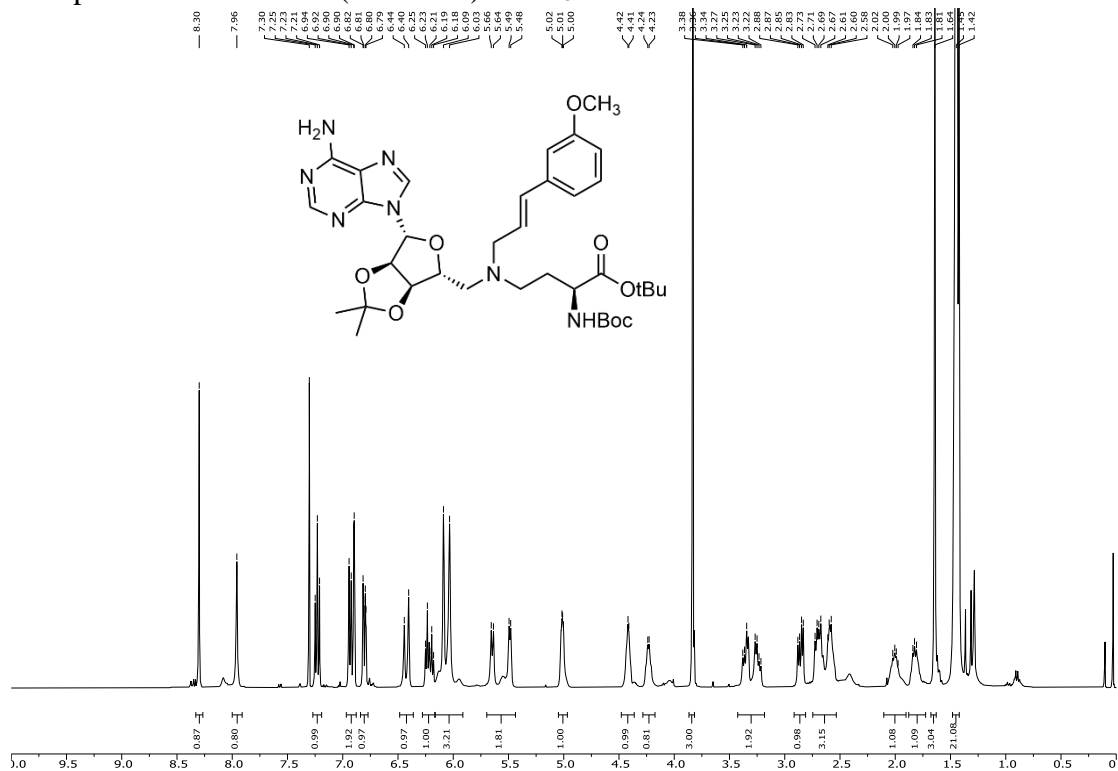

$^{13}\text{C}$  NMR (101 MHz)  $\text{CDCl}_3$

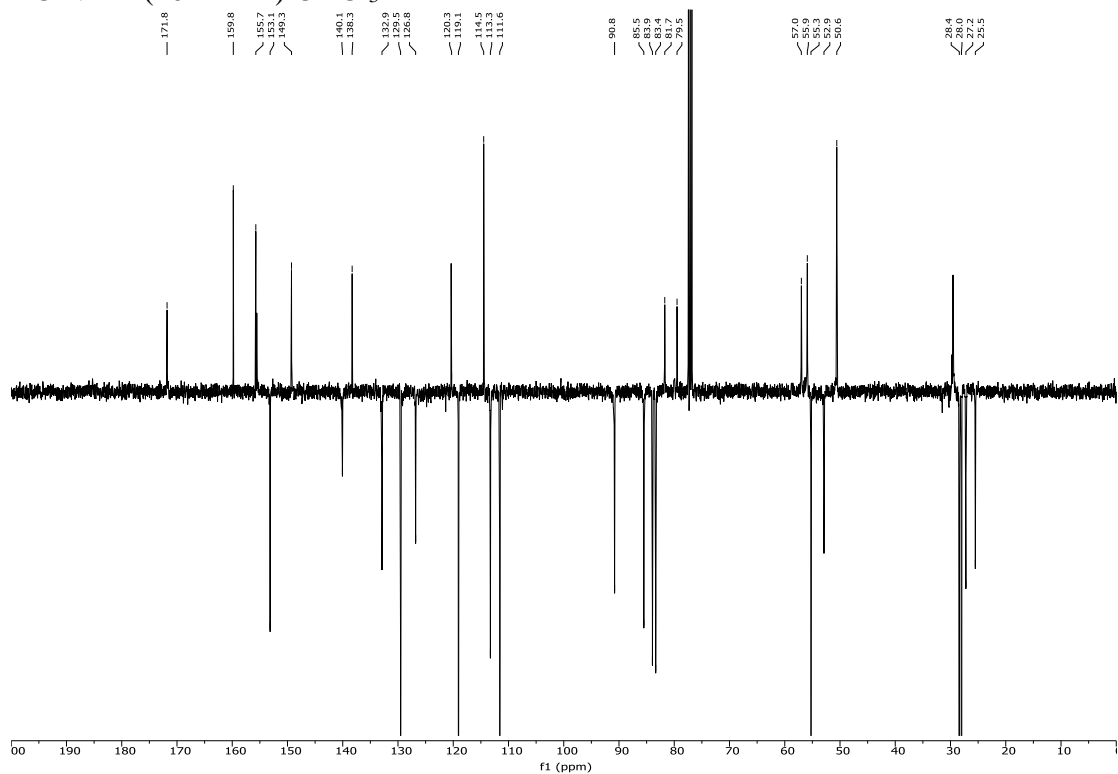



Compound **16f**  $^1\text{H}$  NMR (400 MHz)  $\text{CDCl}_3$

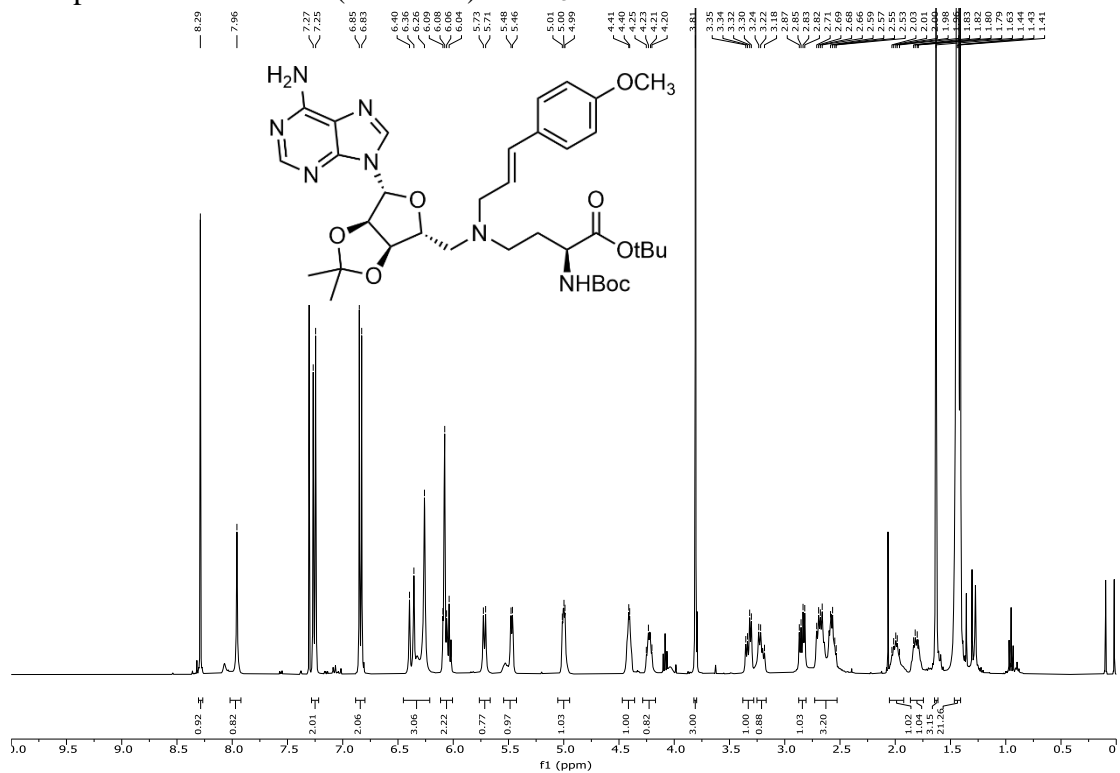

$^{13}\text{C}$  NMR (400 MHz)  $\text{CDCl}_3$

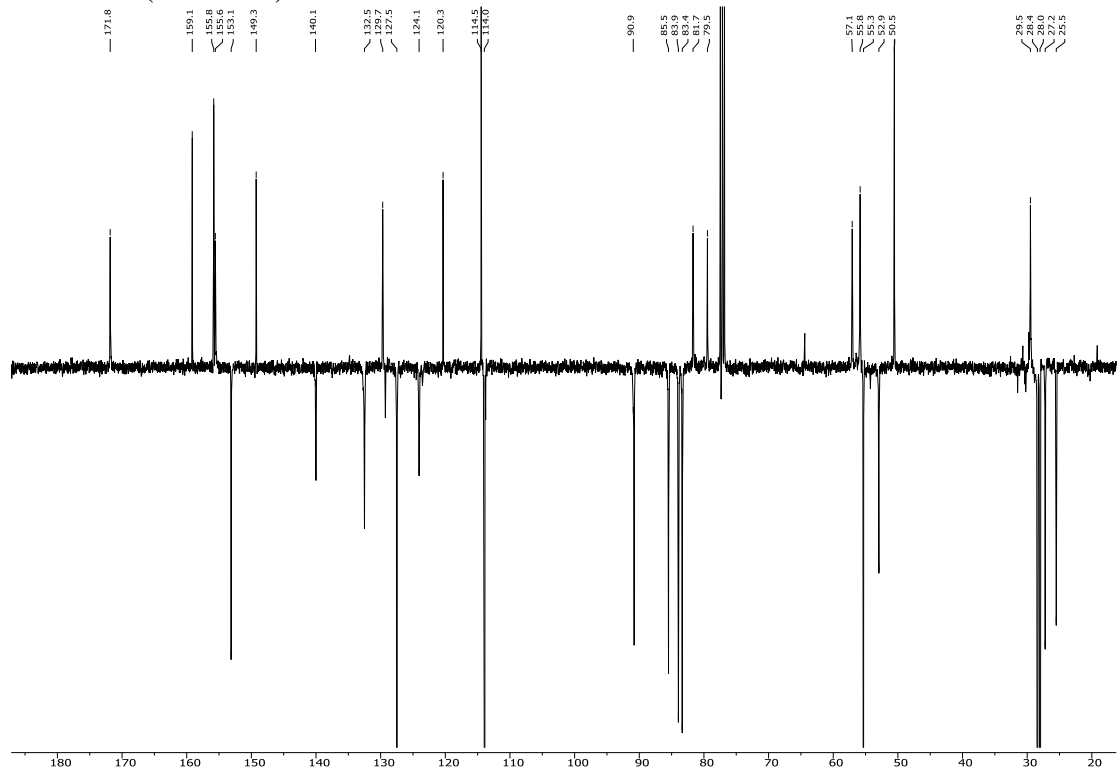

Compound **16g**  $^1\text{H}$  NMR  $\text{CDCl}_3$

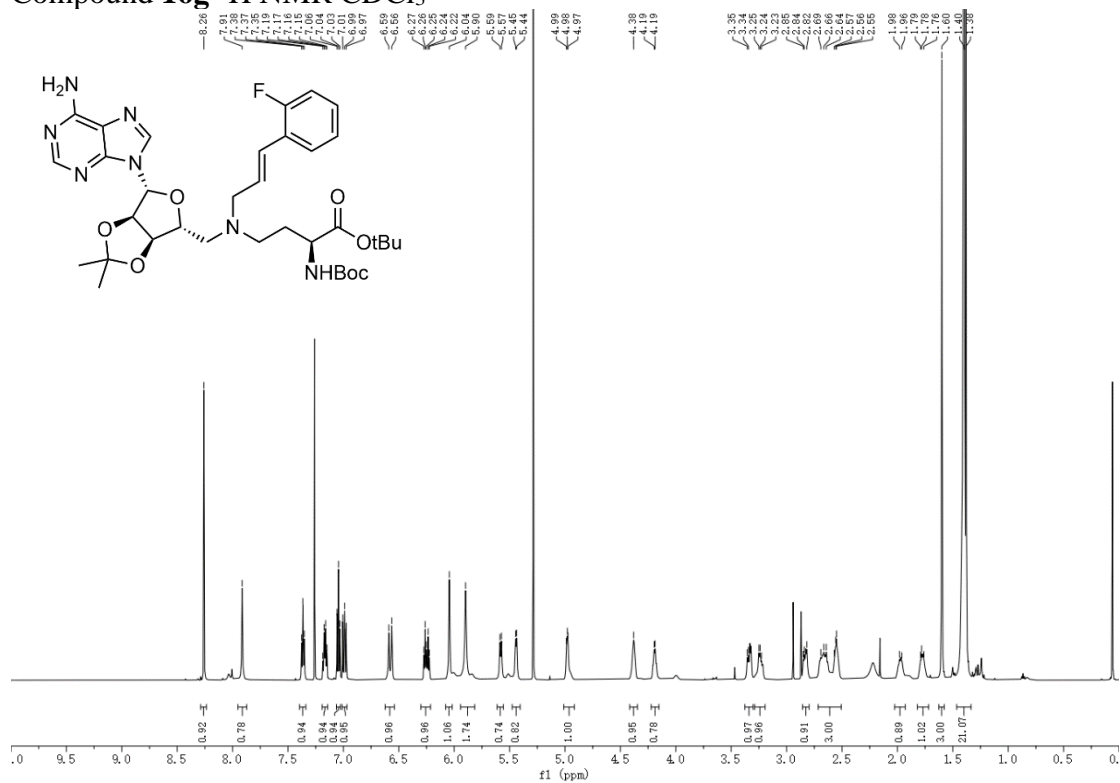

$^{13}\text{C}$  NMR (101 MHz)  $\text{CDCl}_3$

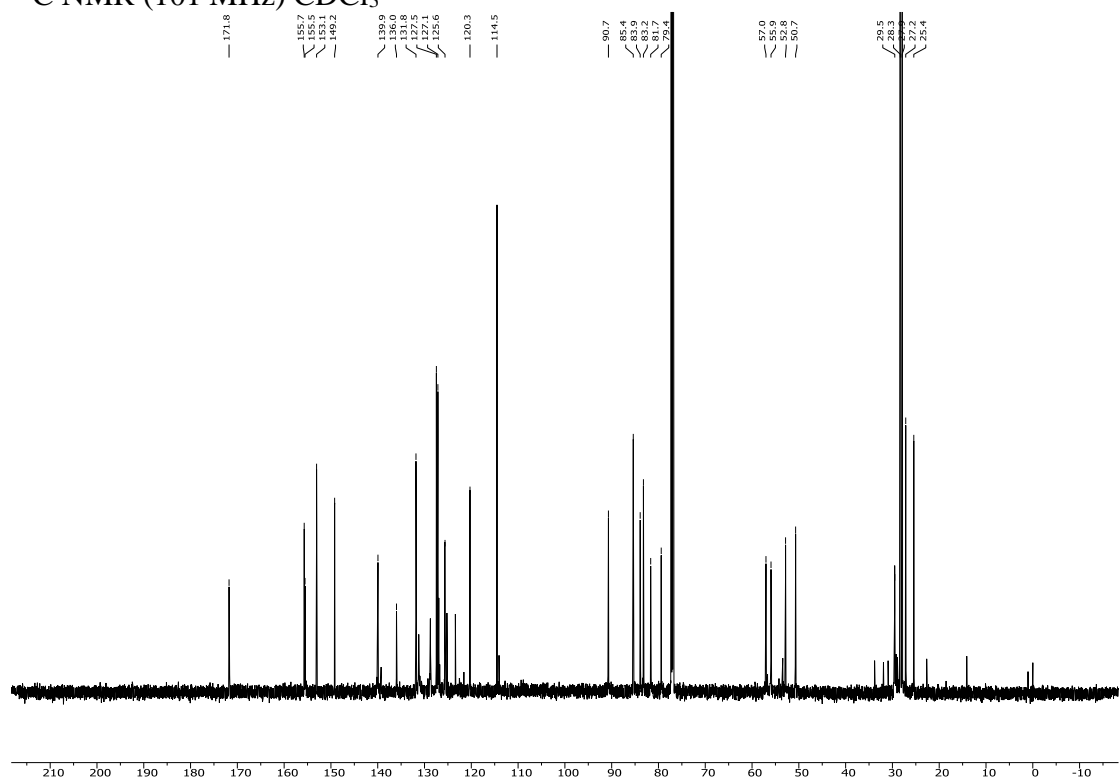

Compound **16h**  $^1\text{H}$  NMR (600 MHz)  $\text{CDCl}_3$

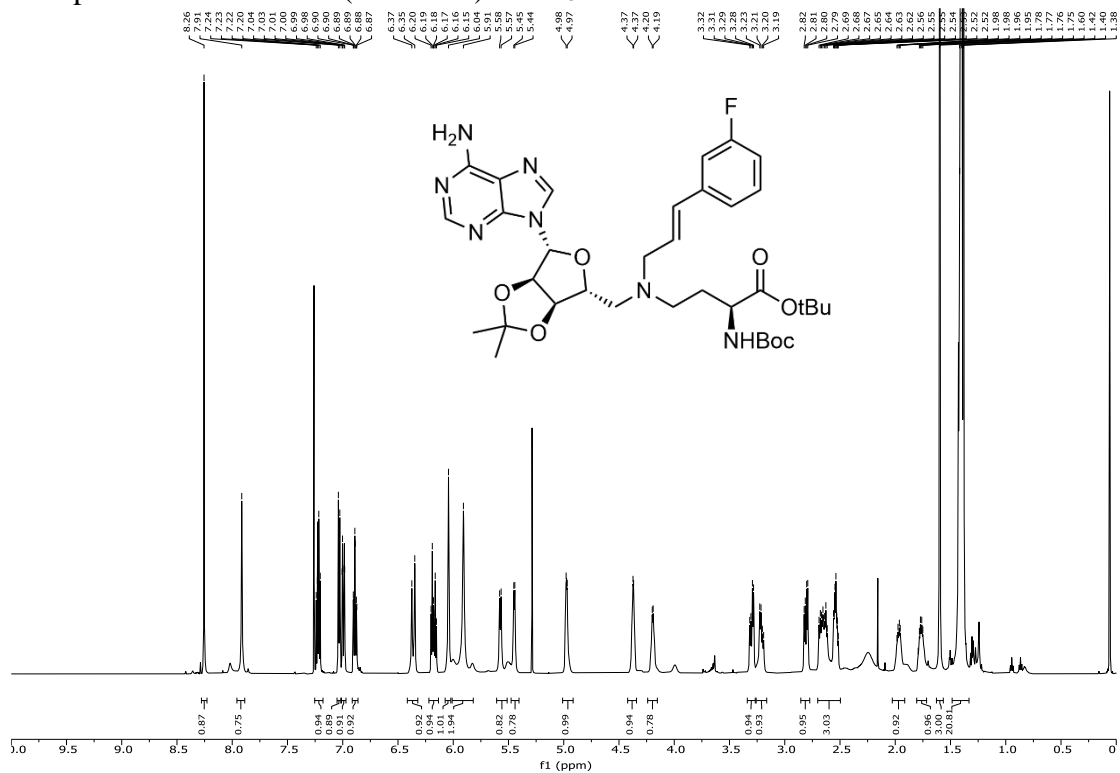

$^{13}\text{C}$  NMR (151 MHz)  $\text{CDCl}_3$

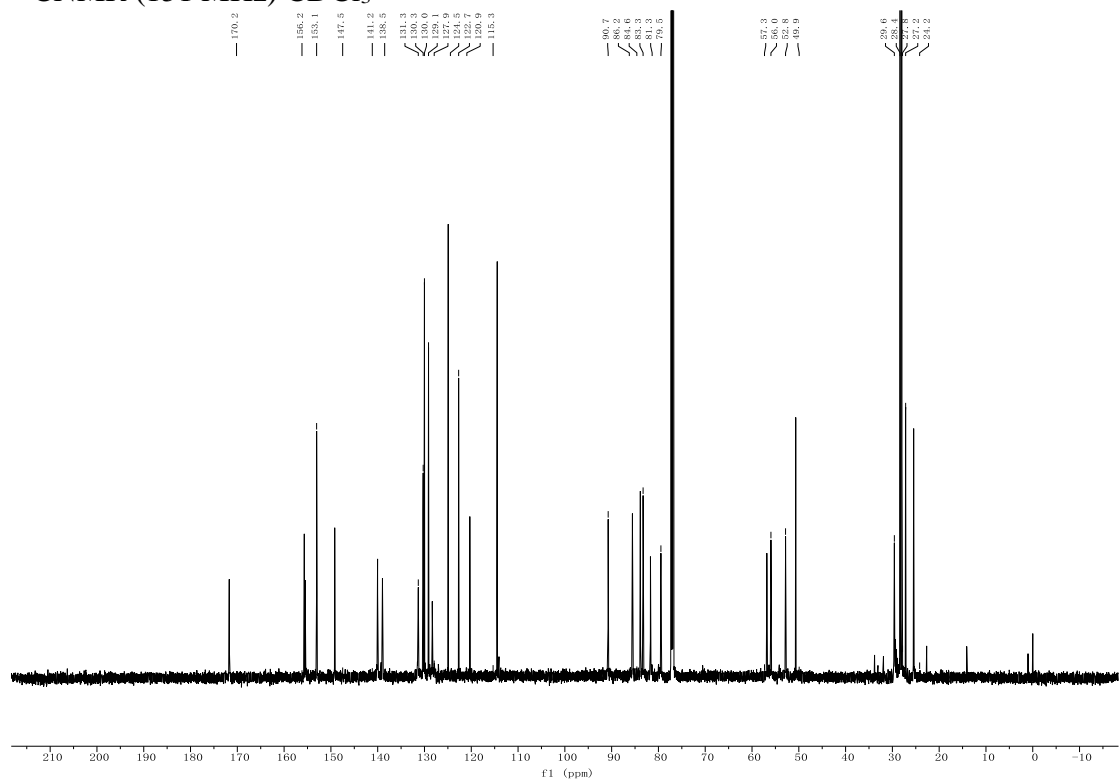

Compound **16i**  $^1\text{H}$  NMR (400 MHz)  $\text{CDCl}_3$

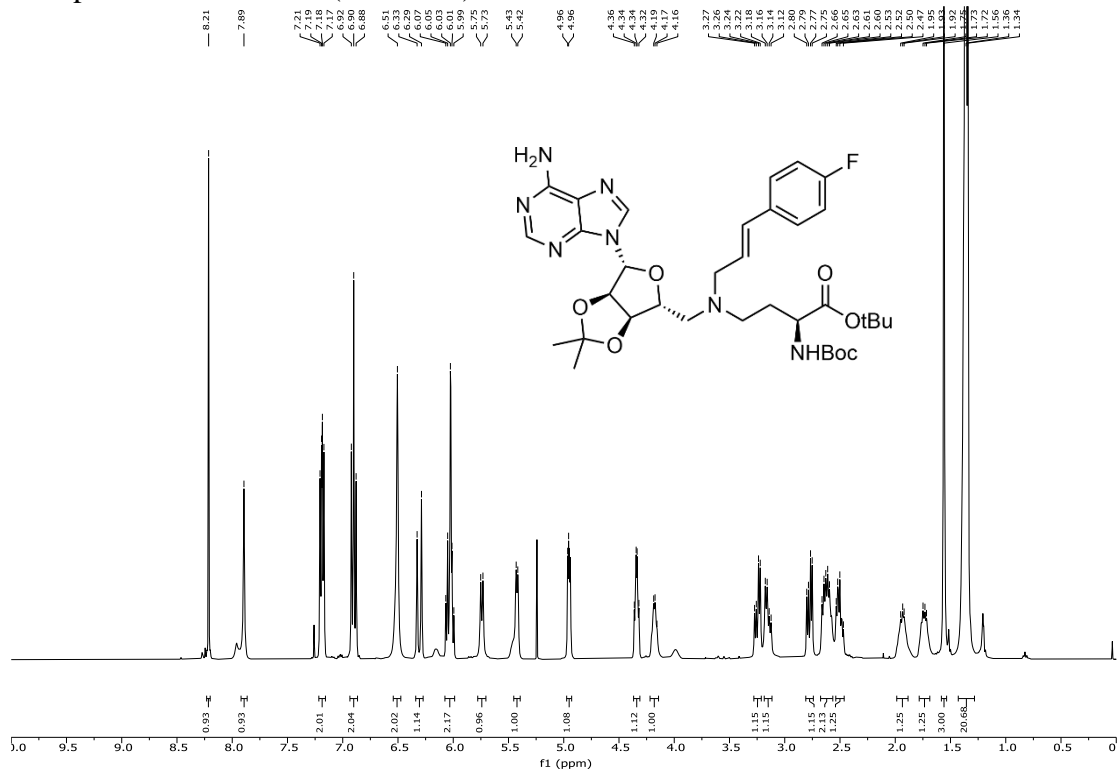

$^{13}\text{C}$  NMR (101 MHz)  $\text{CDCl}_3$

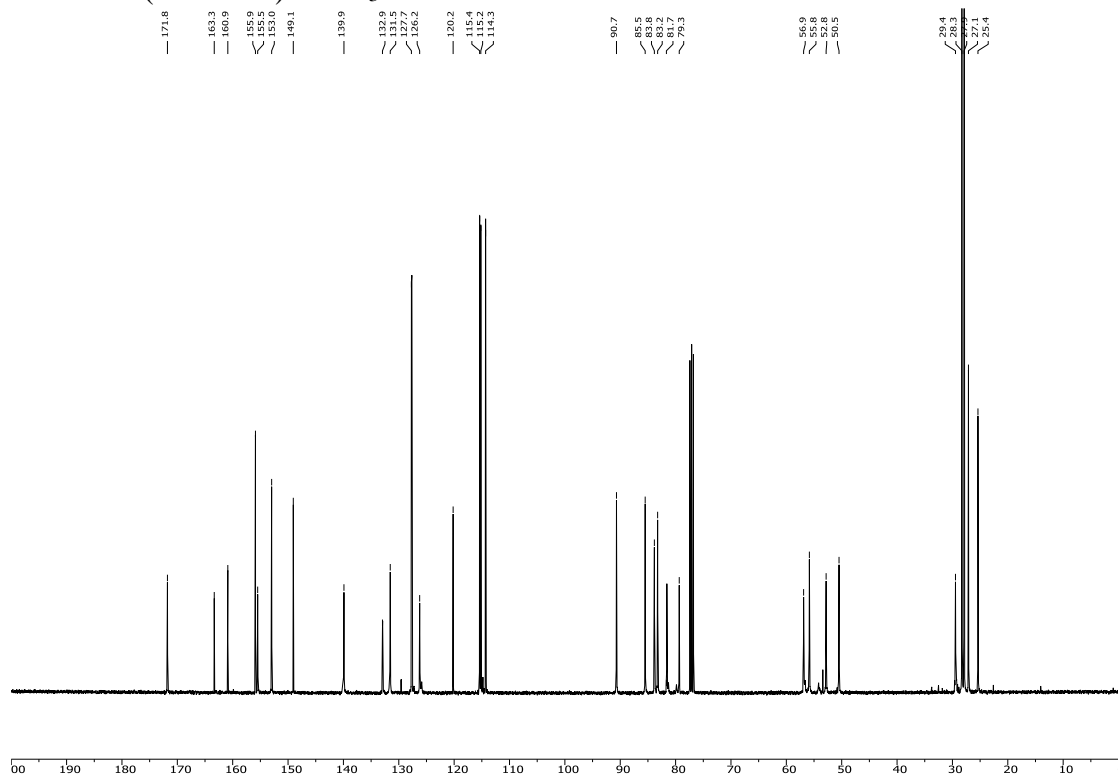

Compound **16j** <sup>1</sup>H NMR (400 MHz) CDCl<sub>3</sub>

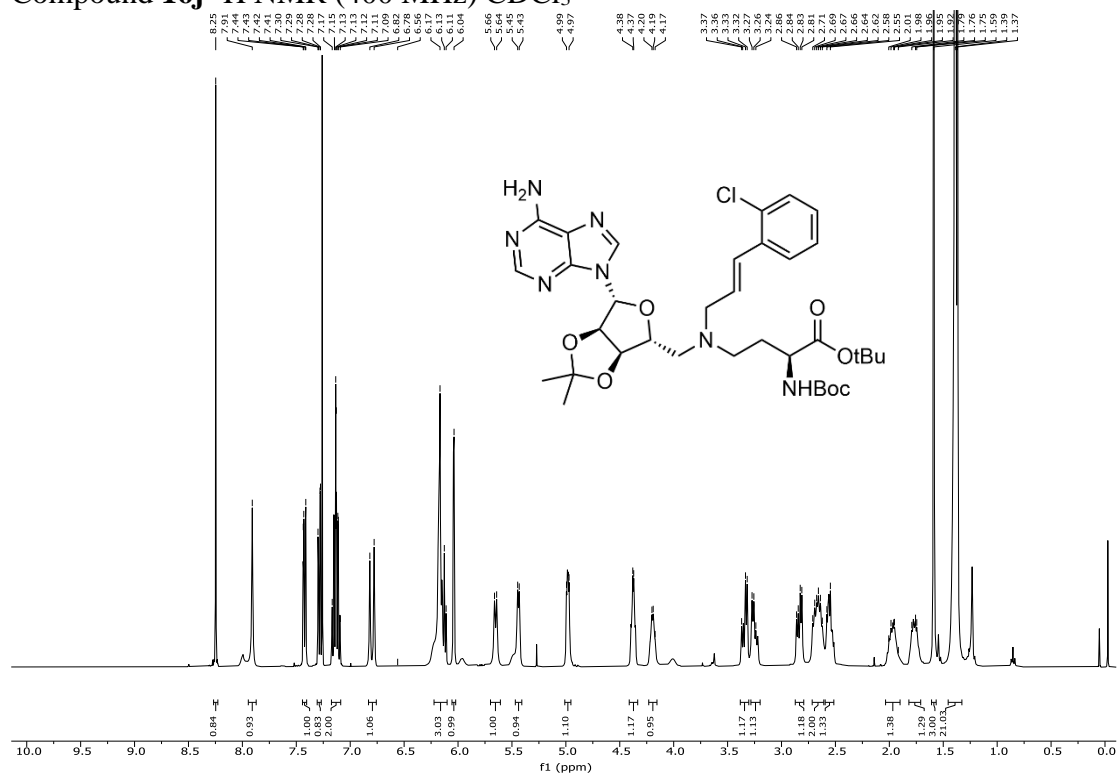

<sup>13</sup>C NMR (101 MHz) CDCl<sub>3</sub>

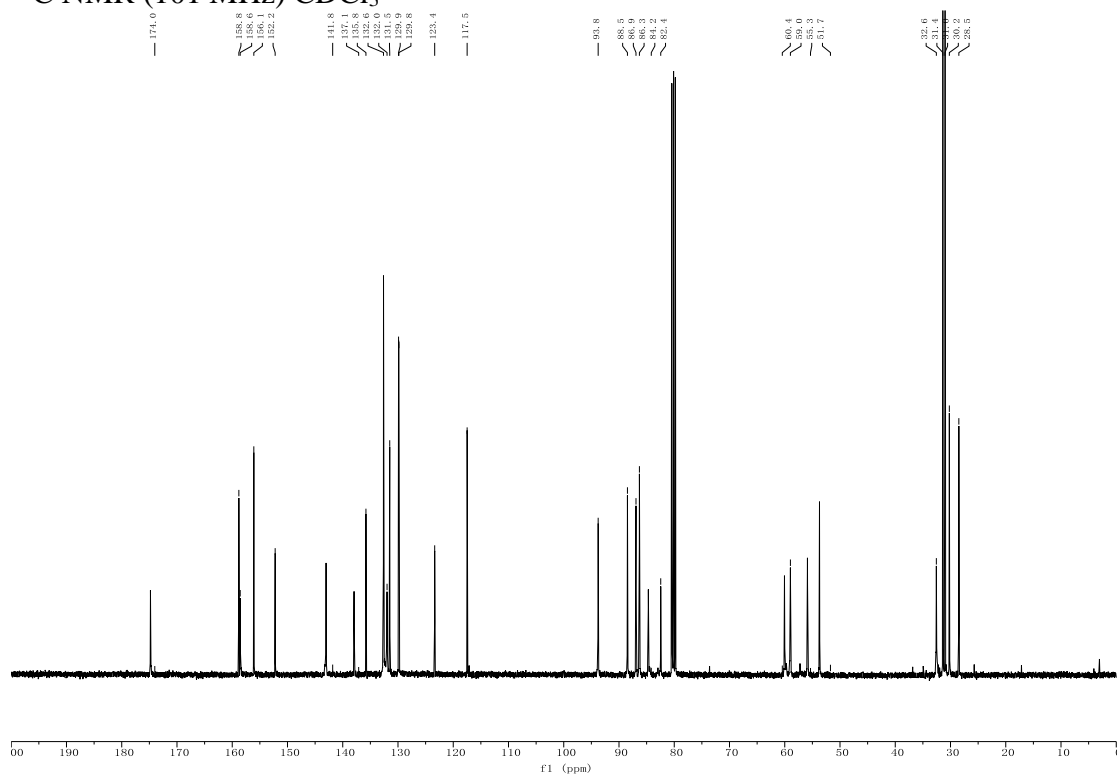

Compound **16k**  $^1\text{H}$  NMR (400 MHz)  $\text{CDCl}_3$

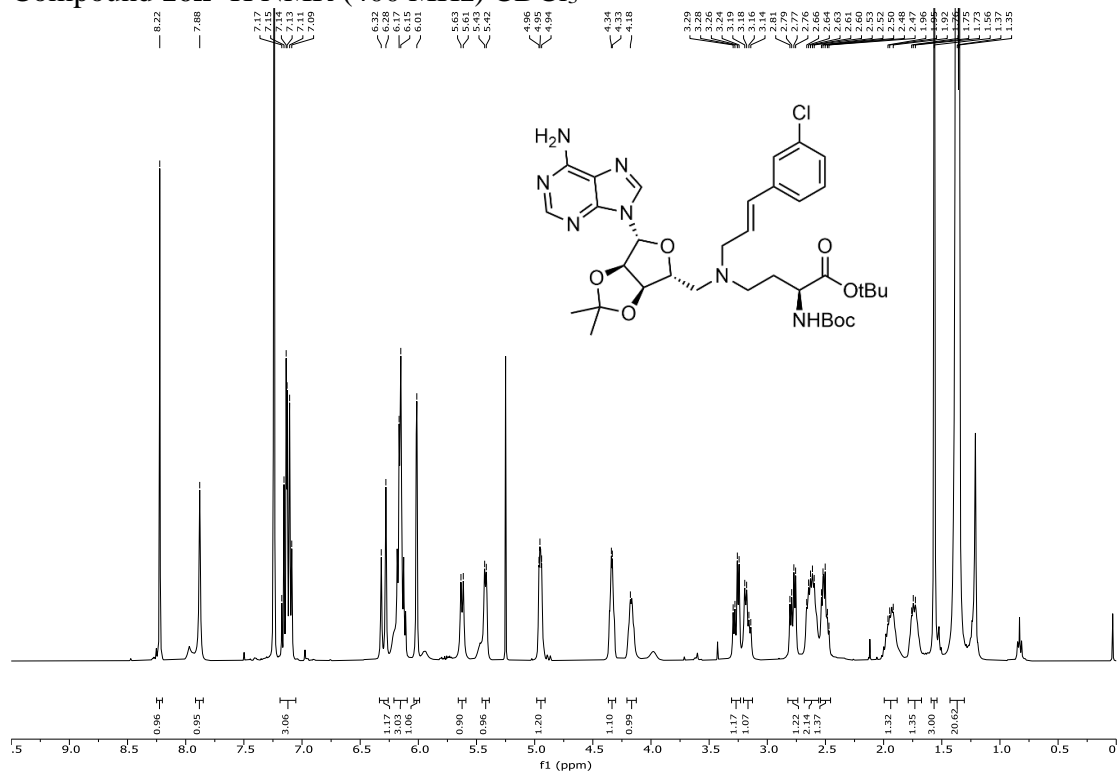

$^{13}\text{C}$  NMR (101 MHz)  $\text{CDCl}_3$

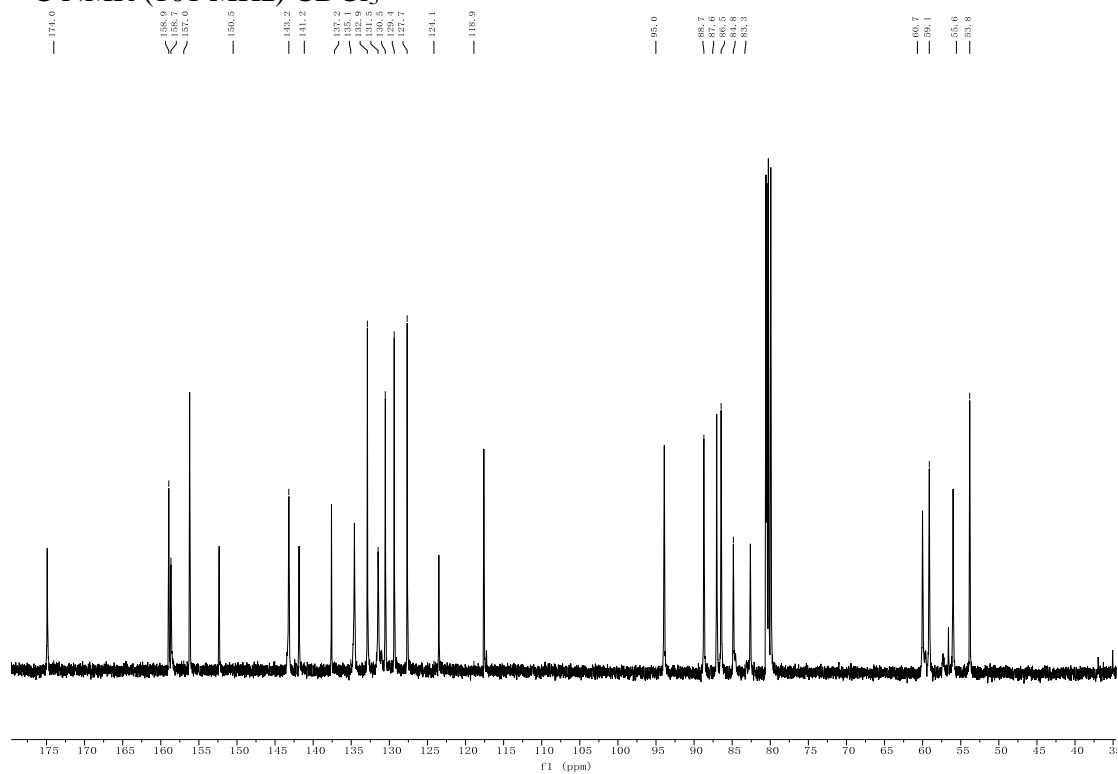

Compound **161**  $^1\text{H}$  NMR (400 MHz)  $\text{CDCl}_3$

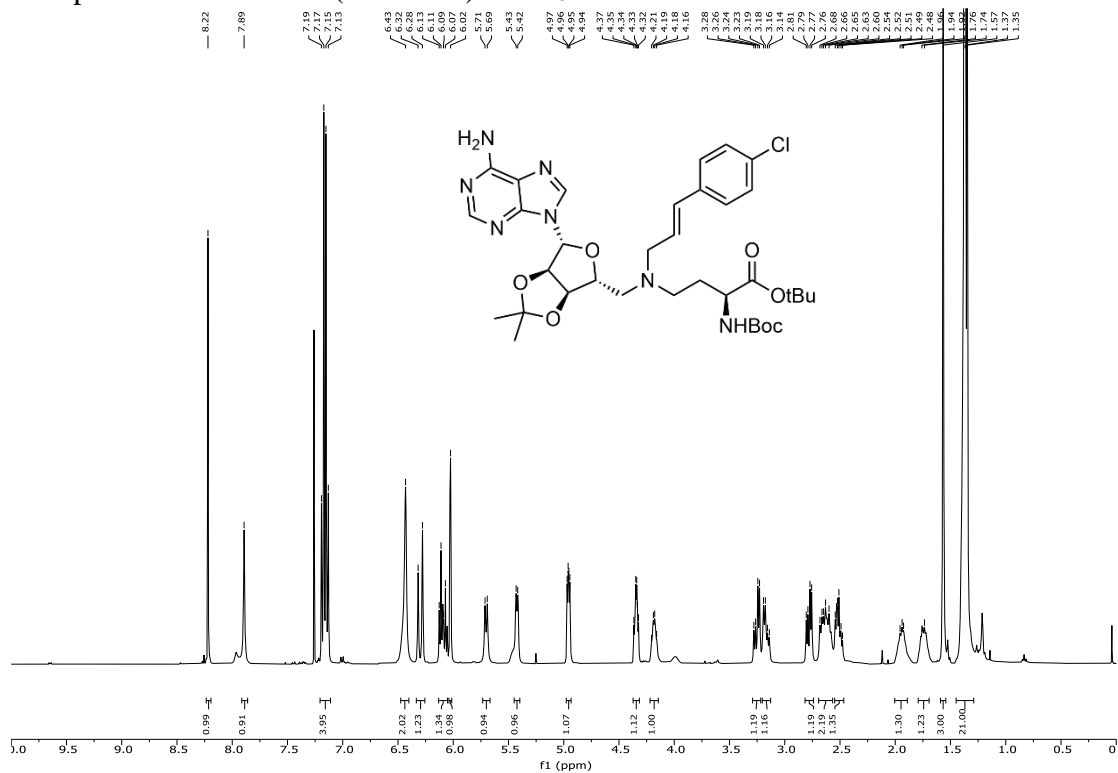

$^{13}\text{C}$  NMR (101MHz)  $\text{CDCl}_3$

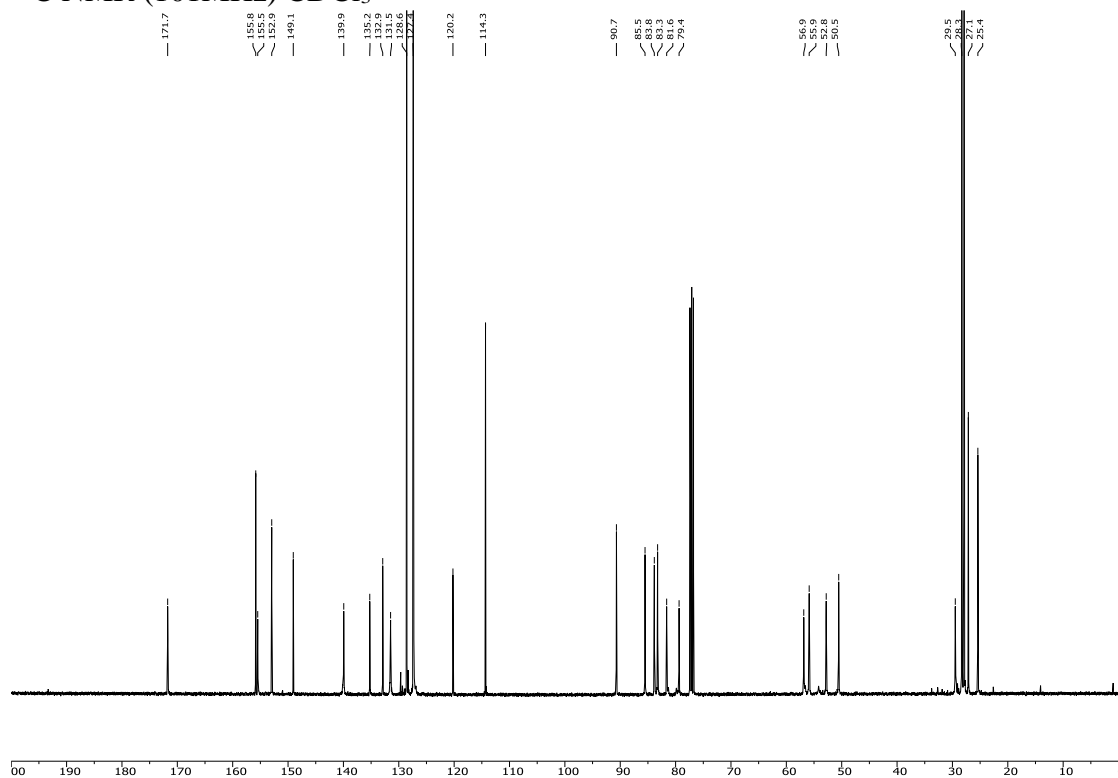

Compound **16m**  $^1\text{H}$  NMR (400 MHz)  $\text{CDCl}_3$

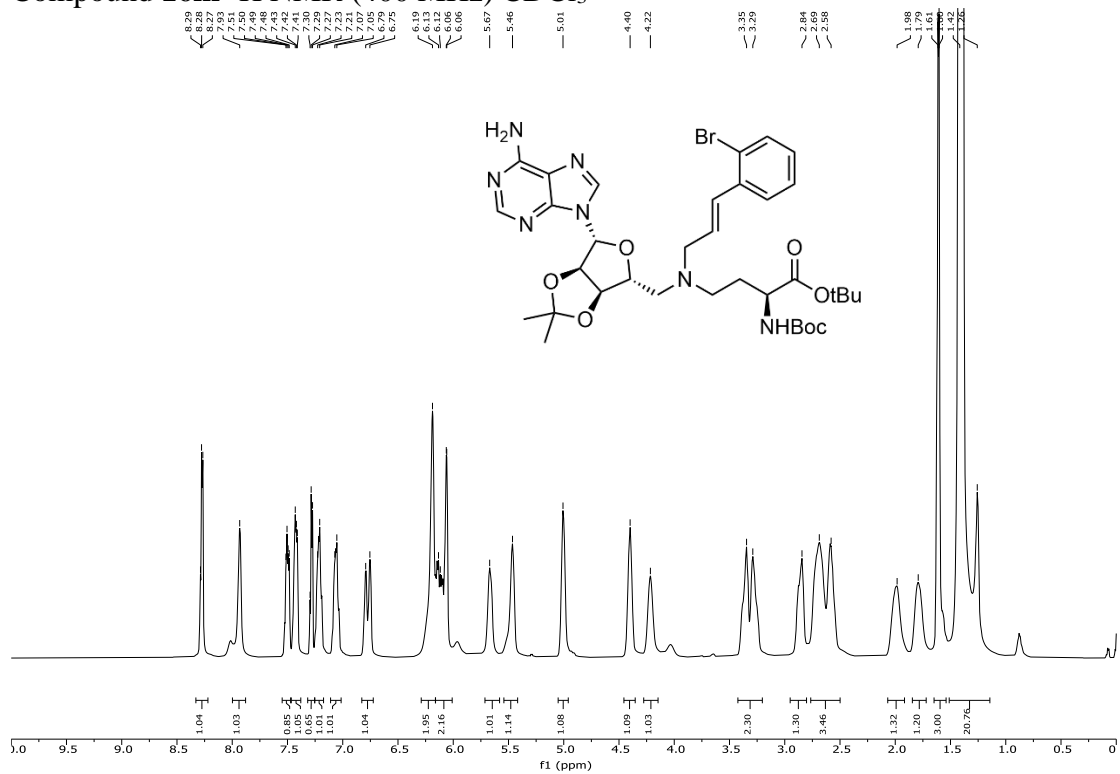

$^{13}\text{C}$  NMR (101 MHz)  $\text{CDCl}_3$

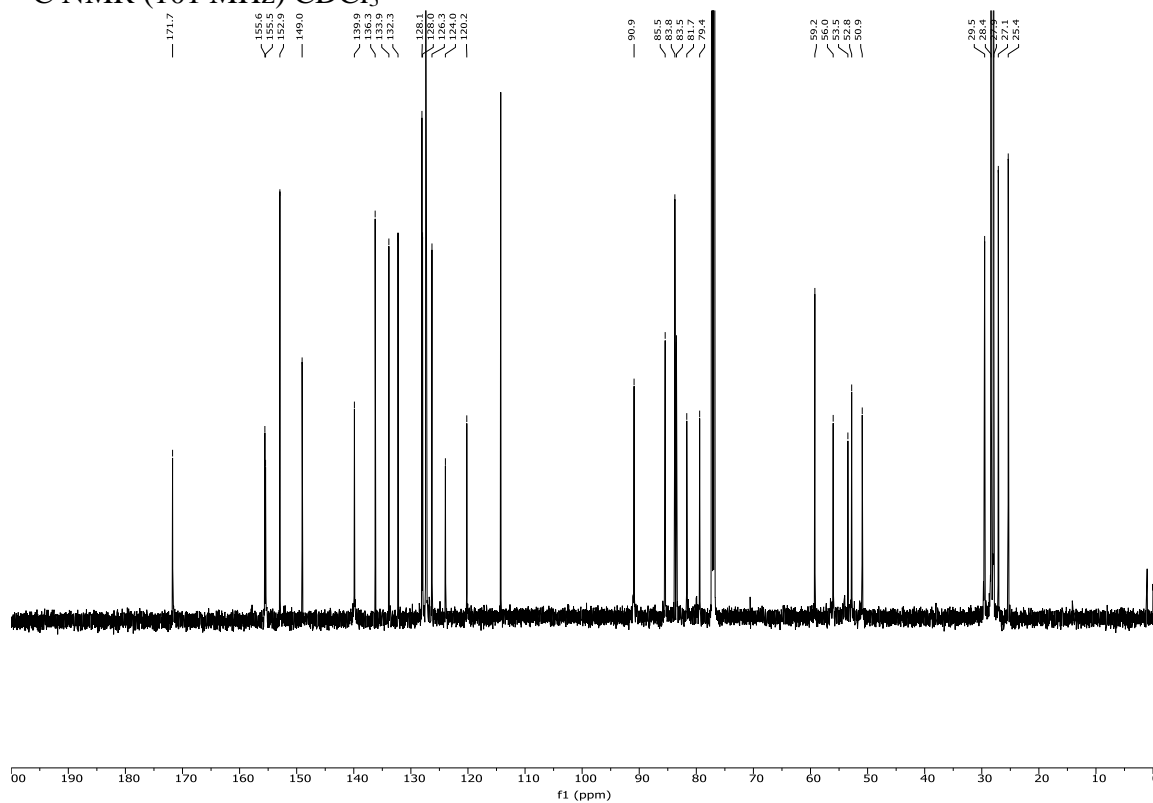



Compound **16n**  $^1\text{H}$  NMR (600 MHz)  $\text{CDCl}_3$

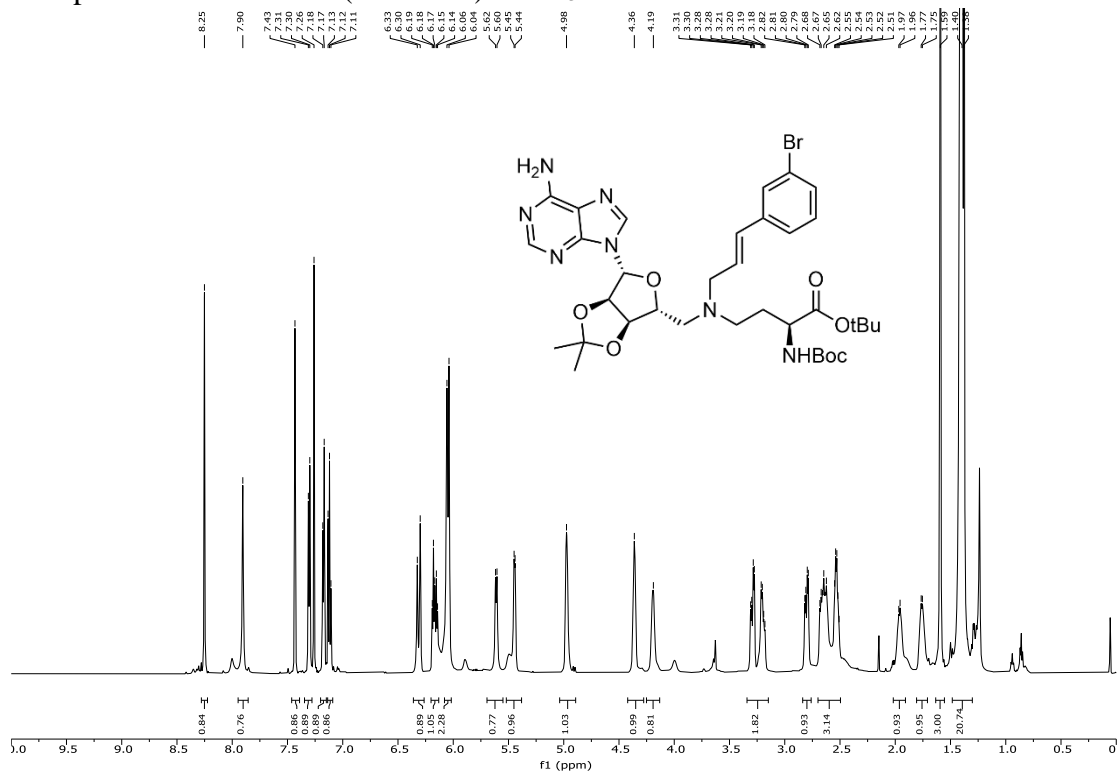

$^{13}\text{C}$  NMR (151 MHz)  $\text{CDCl}_3$

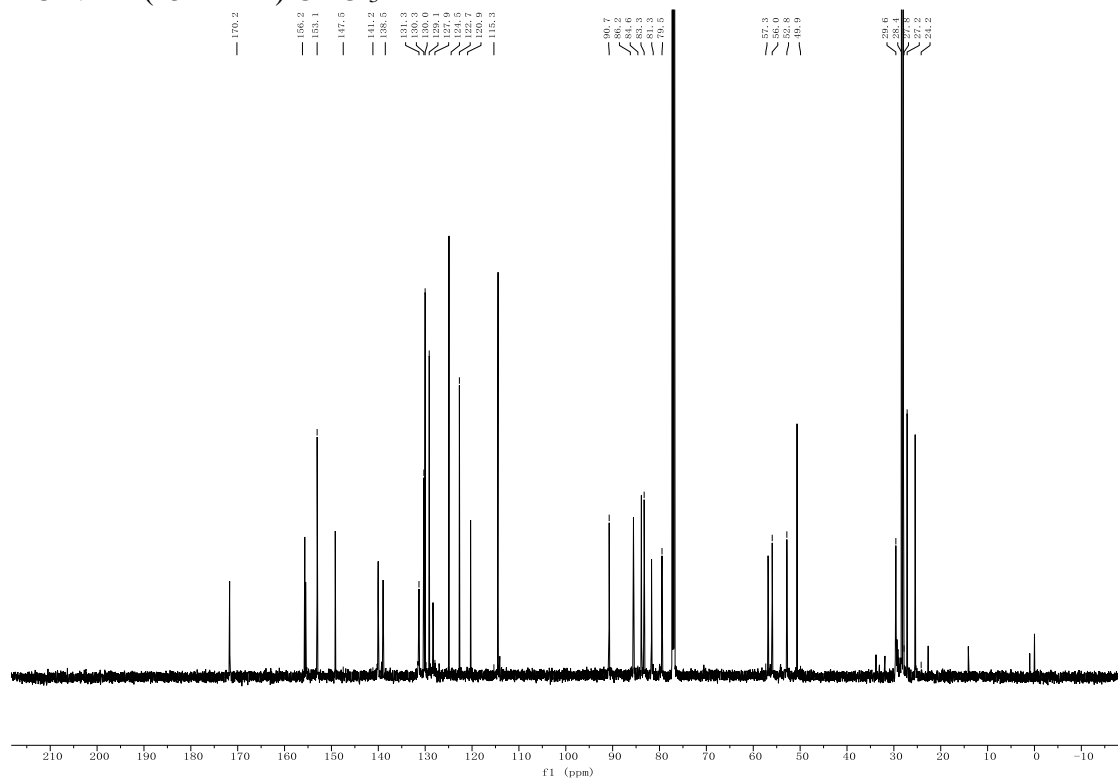

Compound **16o**  $^1\text{H}$  NMR (400 MHz)  $\text{CDCl}_3$

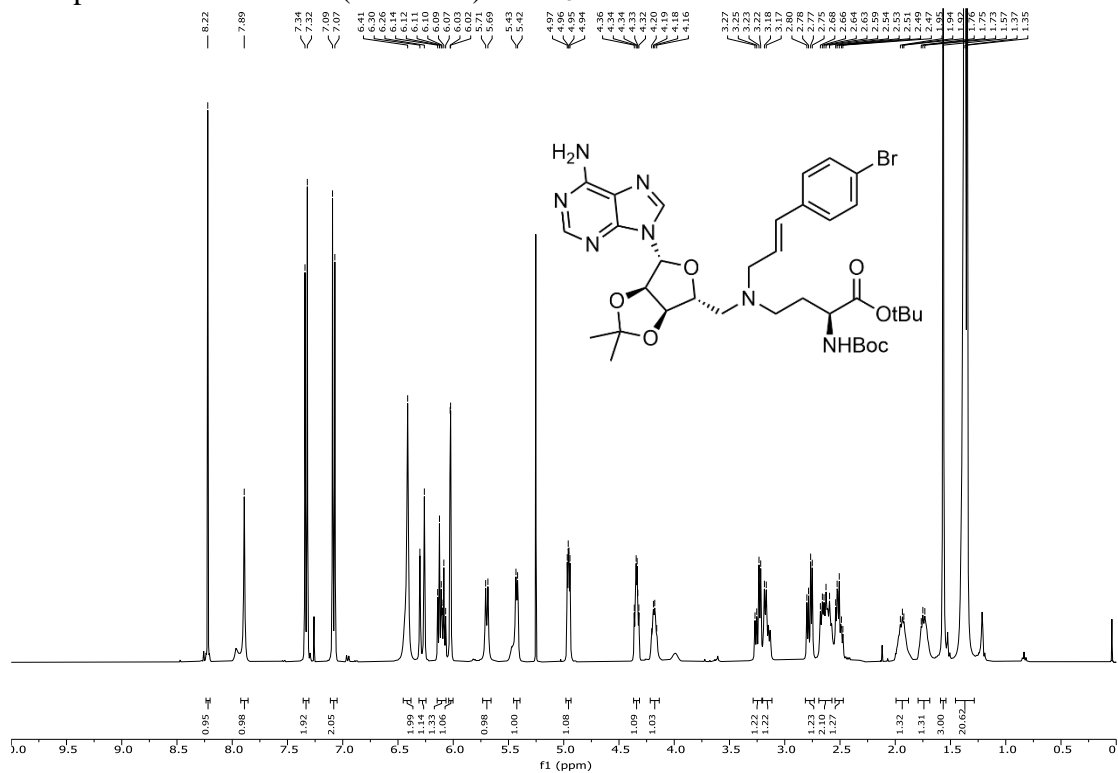

$^{13}\text{C}$  NMR (101 MHz)  $\text{CDCl}_3$

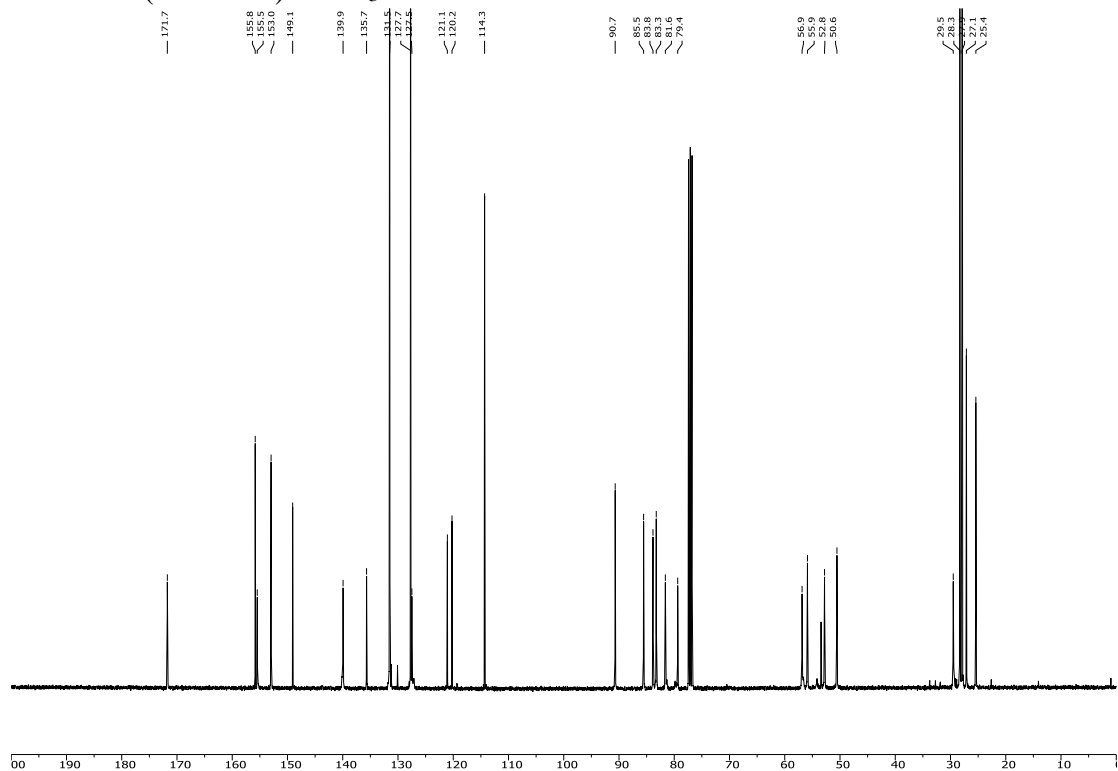

Compound **16p**  $^1\text{H}$  NMR (400 MHz)  $\text{CDCl}_3$

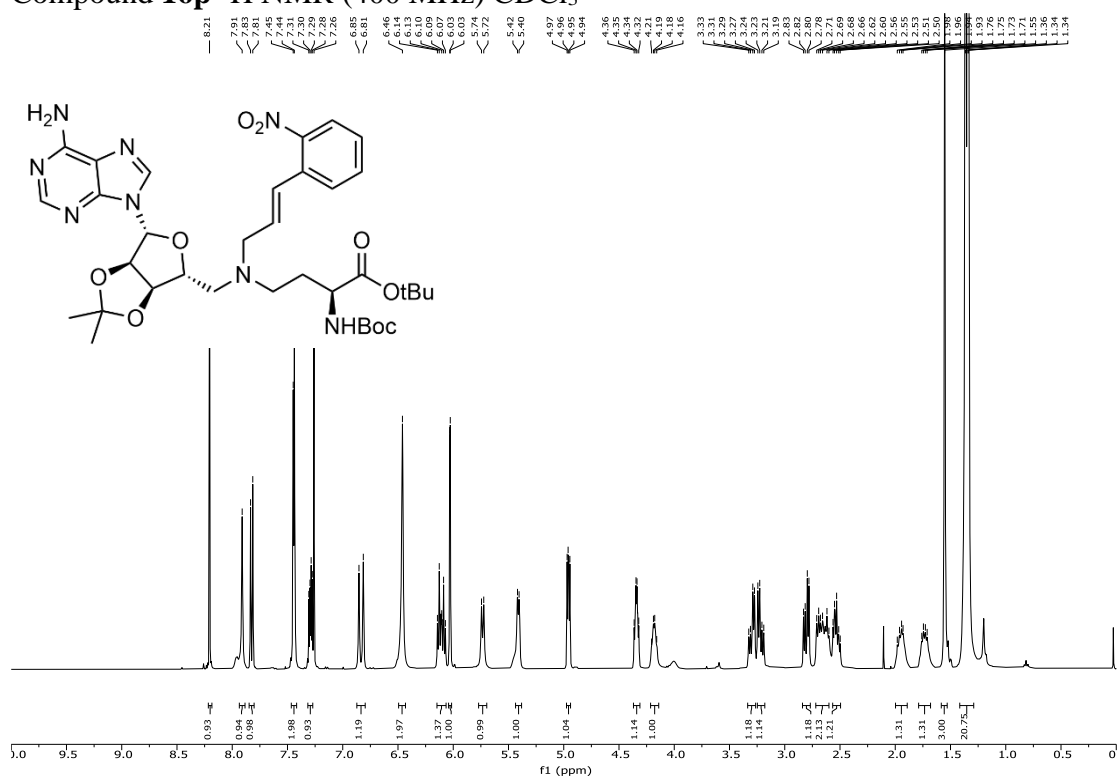

$^{13}\text{C}$  NMR (101 MHz)  $\text{CDCl}_3$

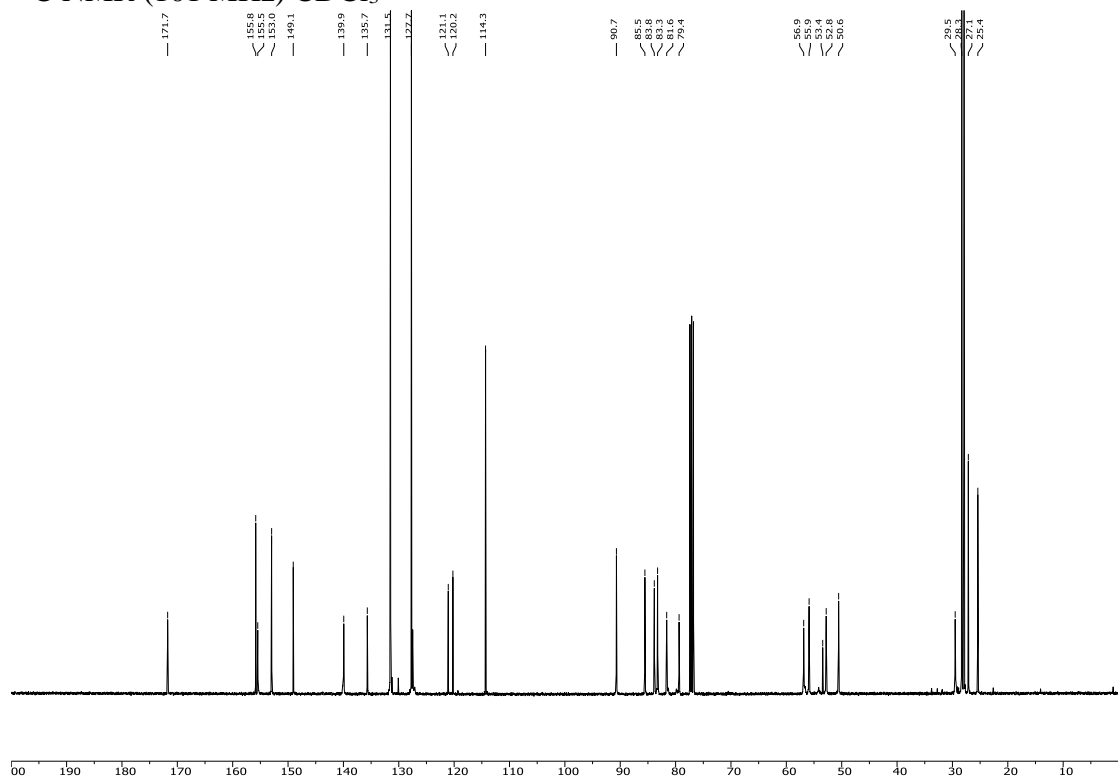

Compound **16q**  $^1\text{H}$  NMR (400 MHz)  $\text{CDCl}_3$

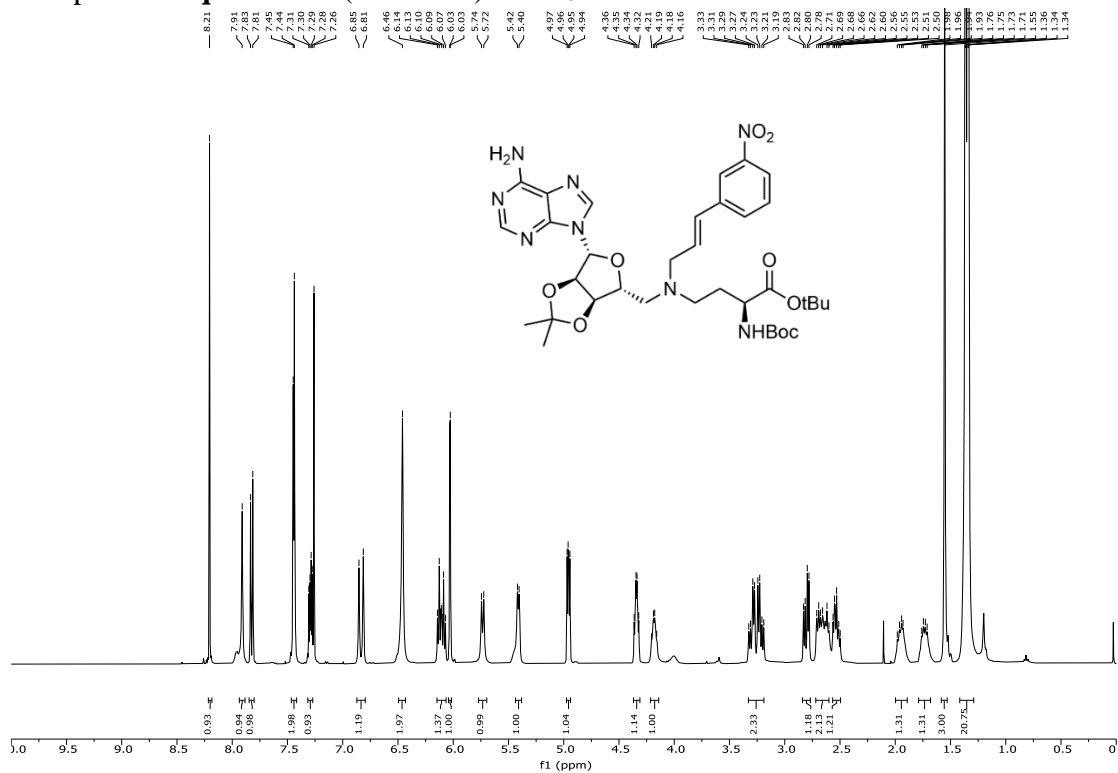

$^{13}\text{C}$  NMR (101 MHz)  $\text{CDCl}_3$

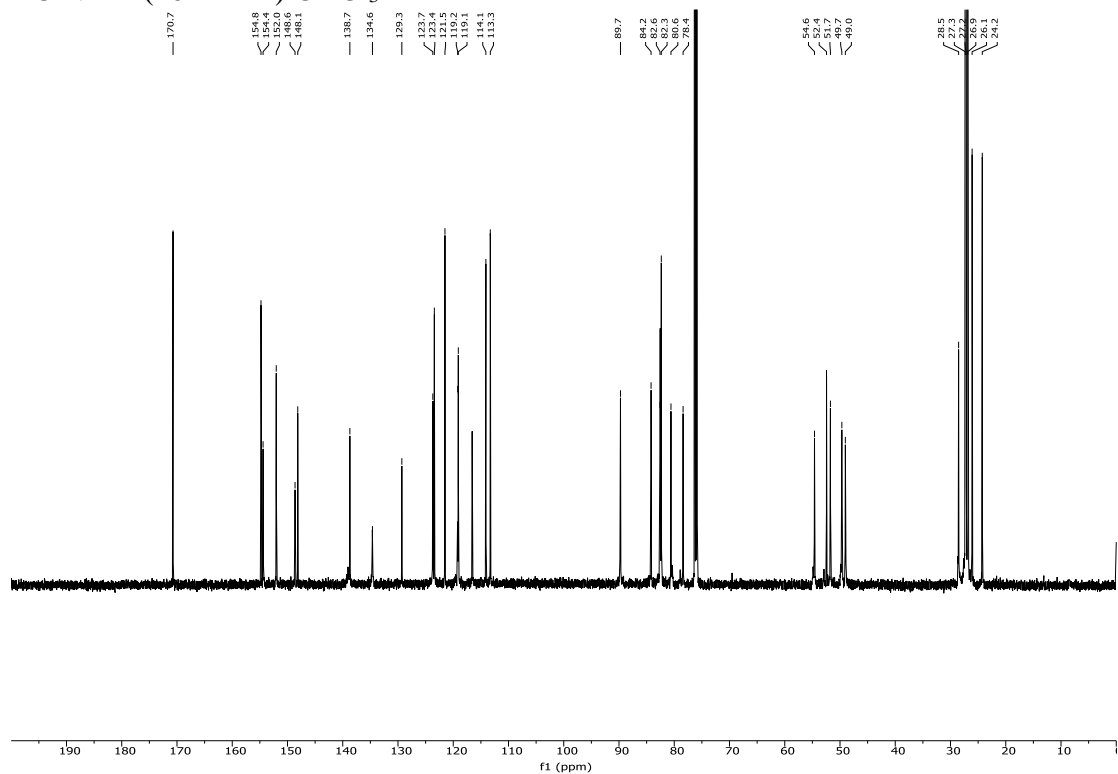



Compound **16s**  $^1\text{H}$  NMR (600 MHz)  $\text{CDCl}_3$

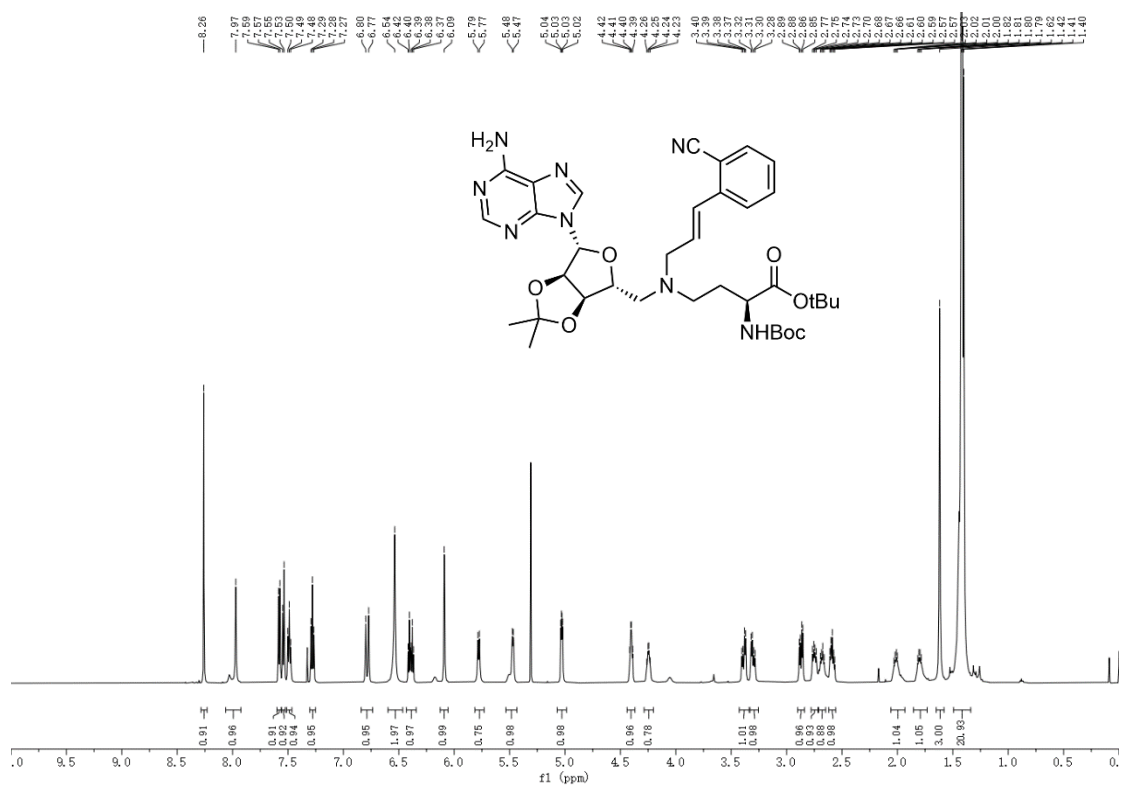

$^{13}\text{C}$  NMR (151 MHz)  $\text{CDCl}_3$

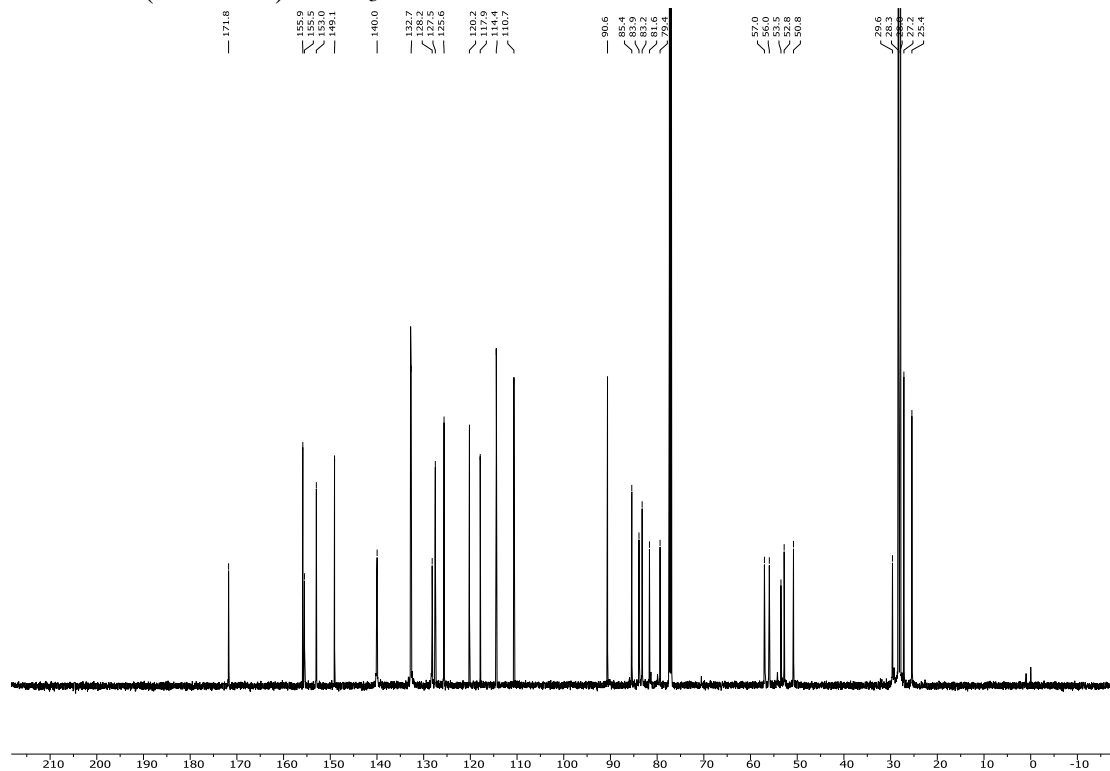

Compound **16t**  $^1\text{H}$  NMR (400 MHz)  $\text{CDCl}_3$

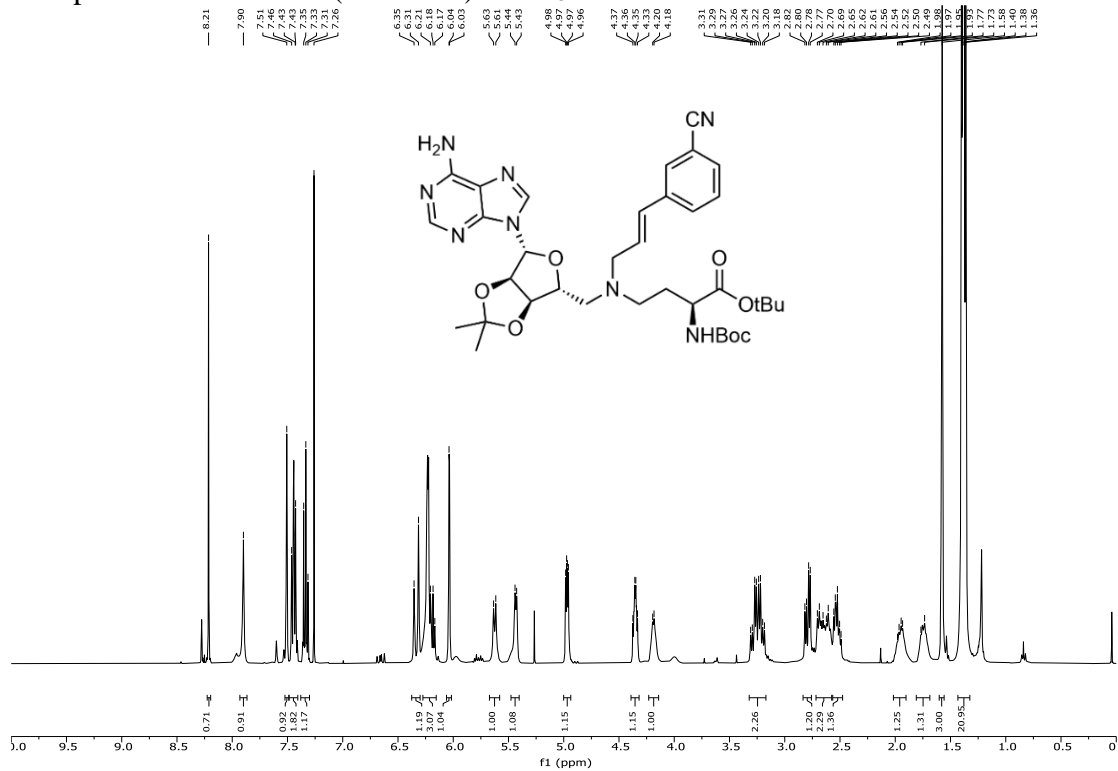

$^{13}\text{C}$  NMR (101 MHz)  $\text{CDCl}_3$

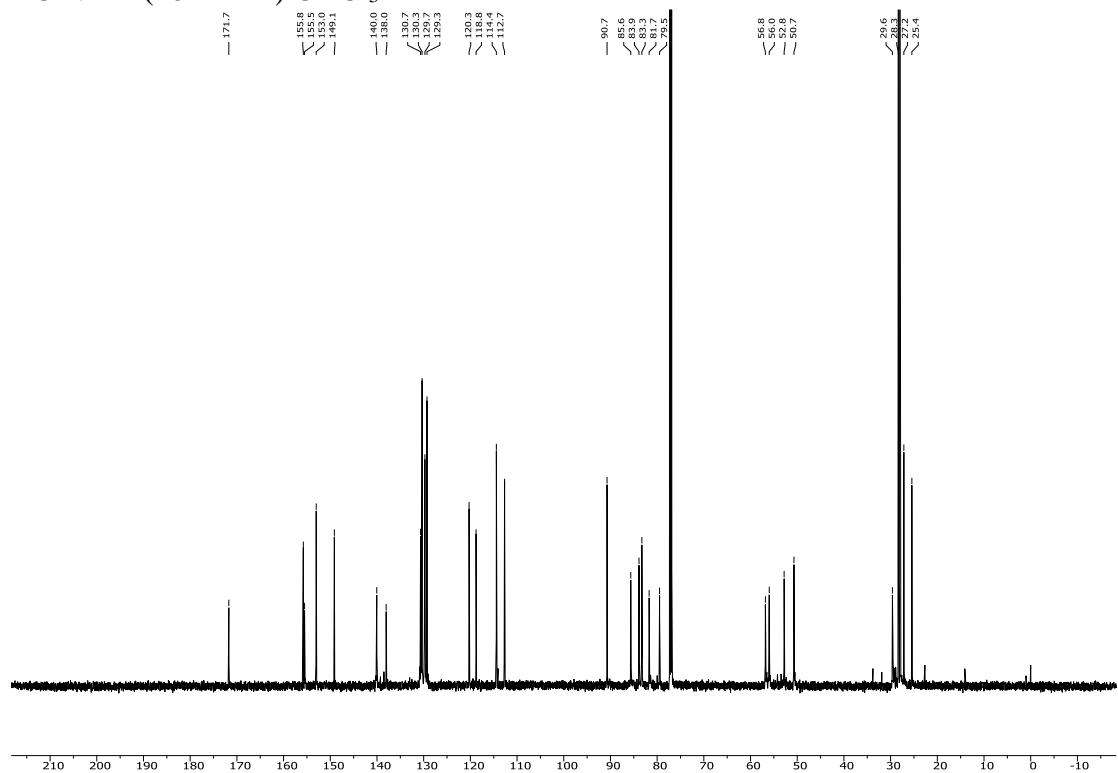

Compound **16u**  $^1\text{H}$  NMR (400 MHz)  $\text{CDCl}_3$

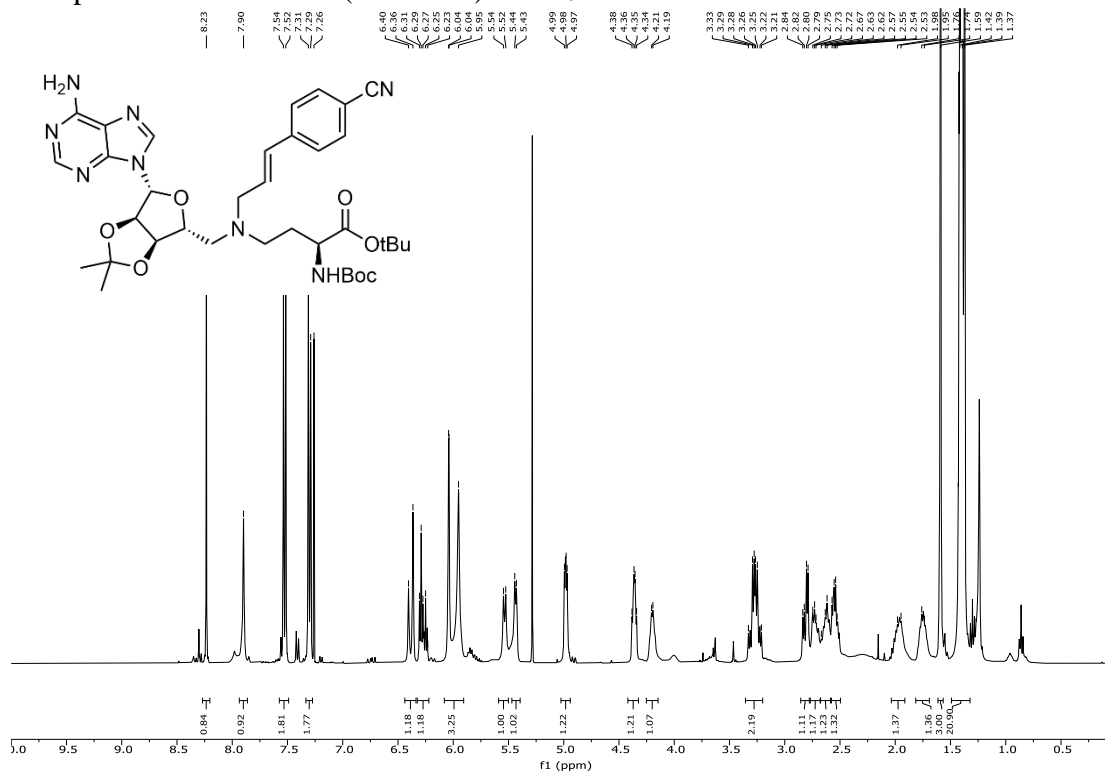

$^{13}\text{C}$  NMR (101 MHz)  $\text{CDCl}_3$

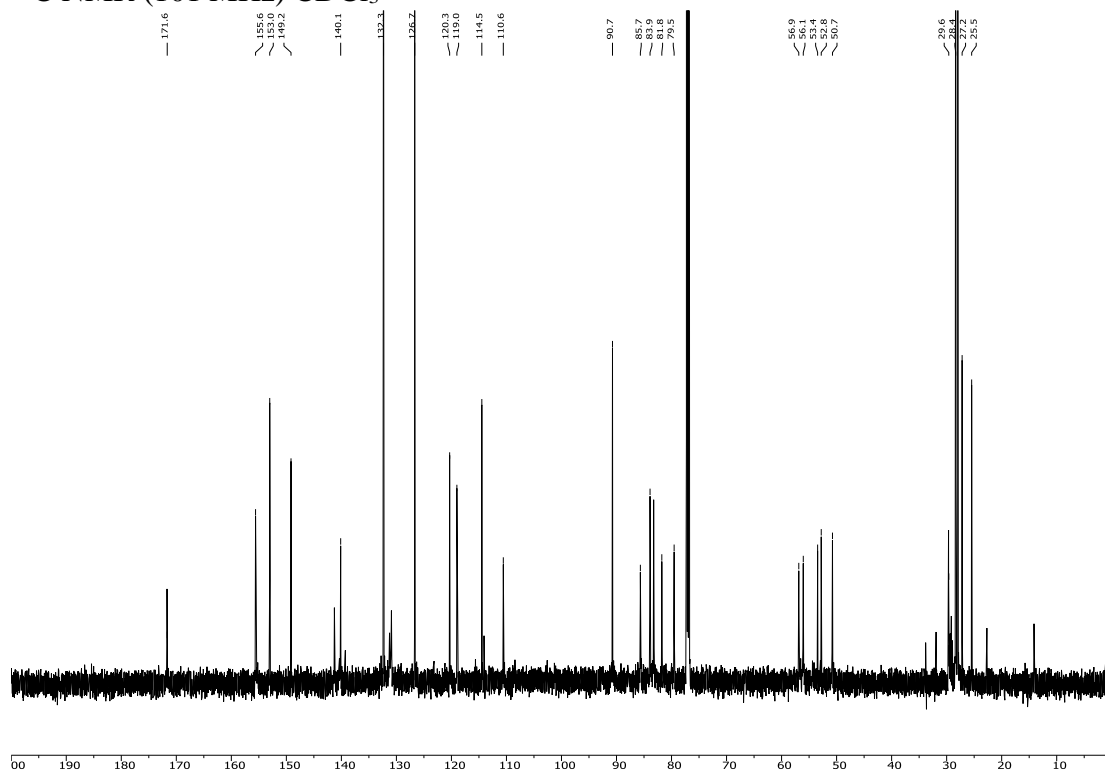



Compound **16v**  $^1\text{H}$  NMR (400 MHz)  $\text{CDCl}_3$

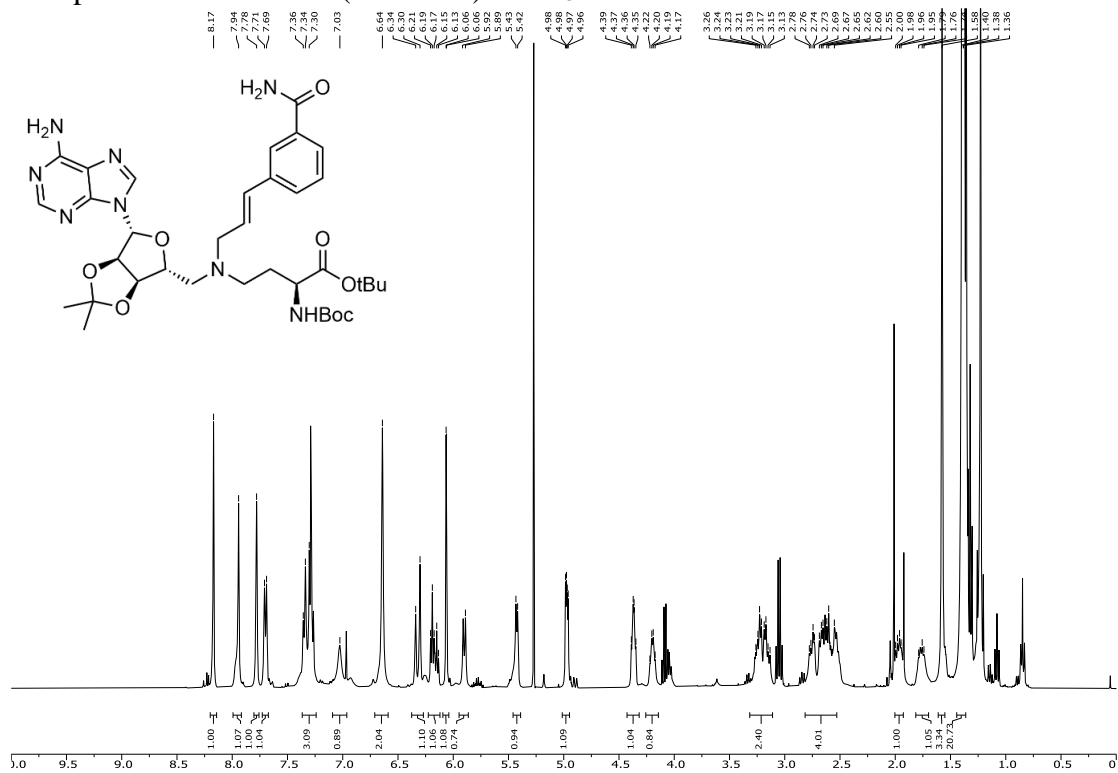

$^{13}\text{C}$  NMR (101 MHz)  $\text{CDCl}_3$

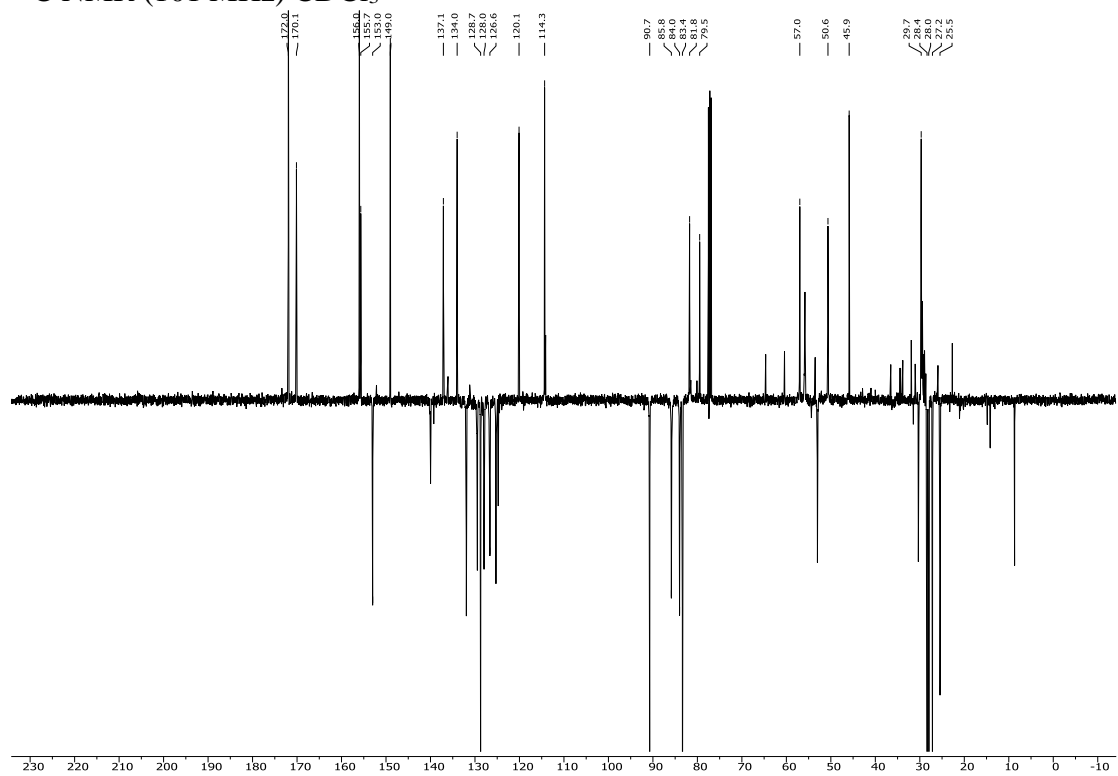

Compound **16w**  $^1\text{H}$  NMR (400 MHz)  $\text{CDCl}_3$

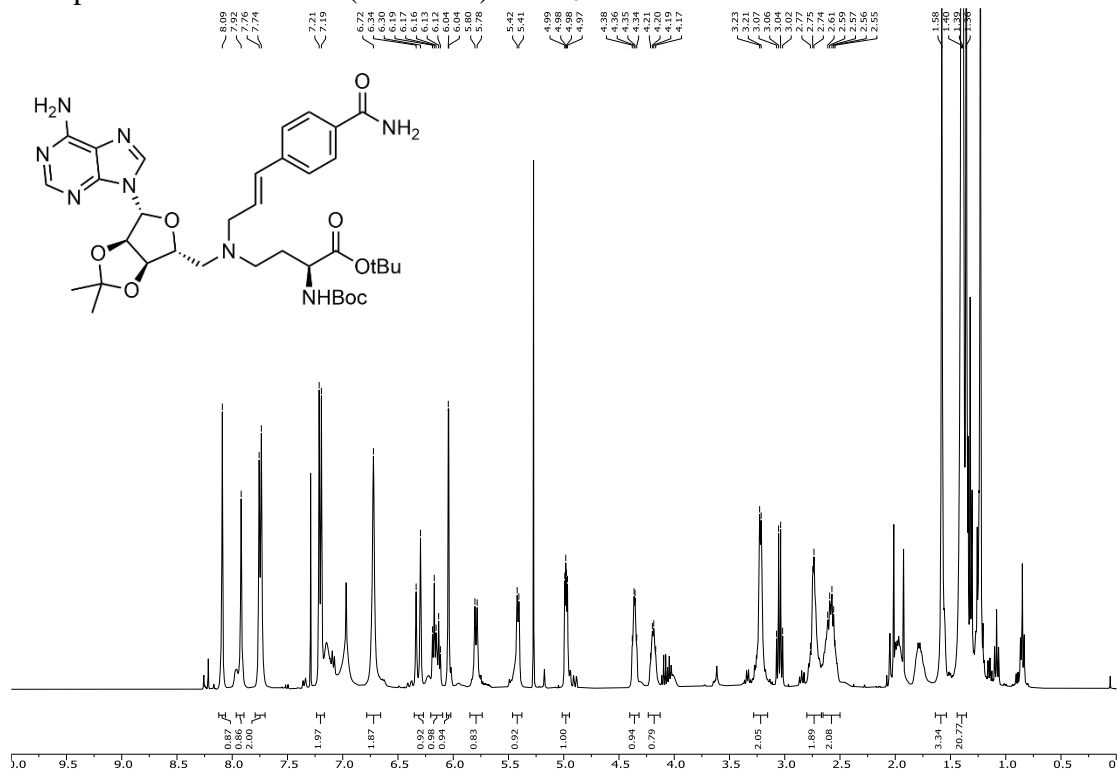

$^{13}\text{C}$  NMR (101 MHz)  $\text{CDCl}_3$

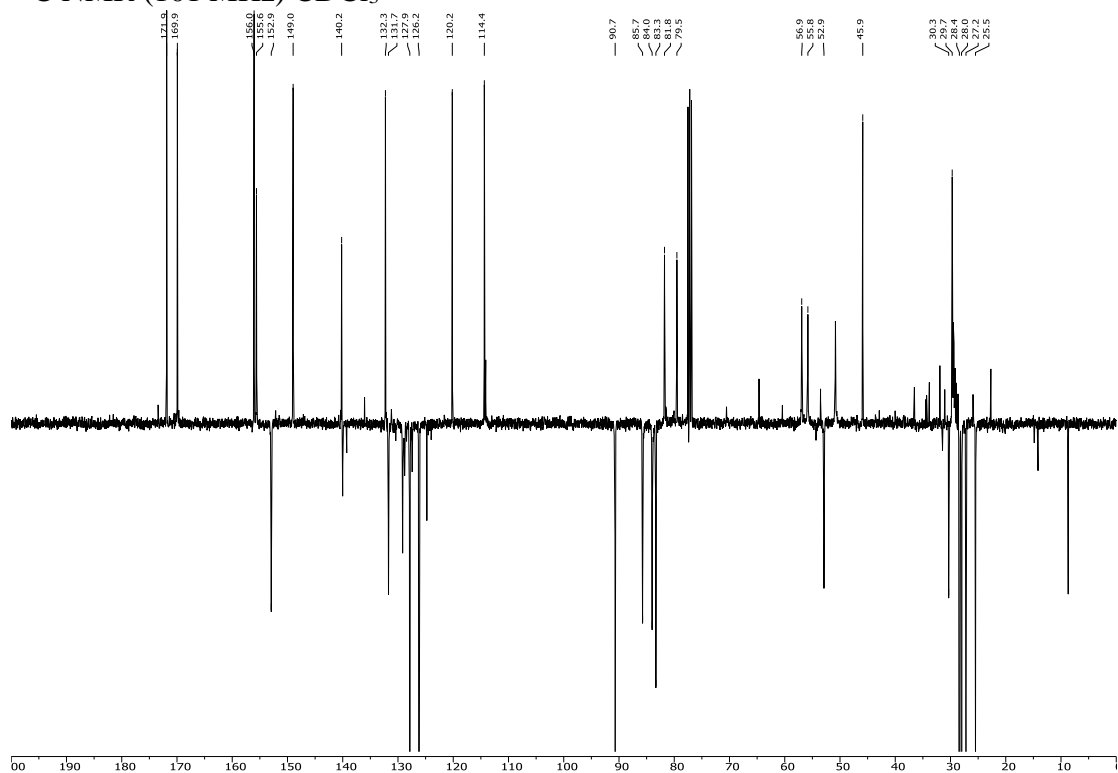

Compound **16x**  $^1\text{H}$  NMR (400 MHz)  $\text{CDCl}_3$

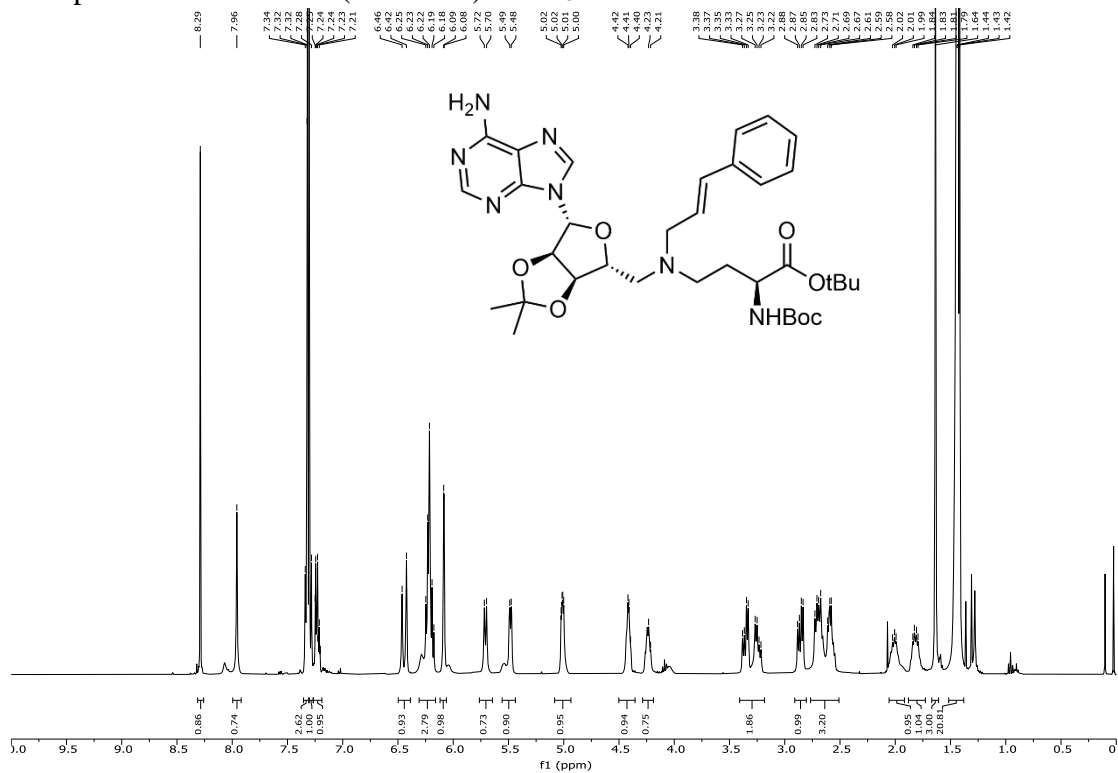

$^{13}\text{C}$  NMR (101 MHz)  $\text{CDCl}_3$

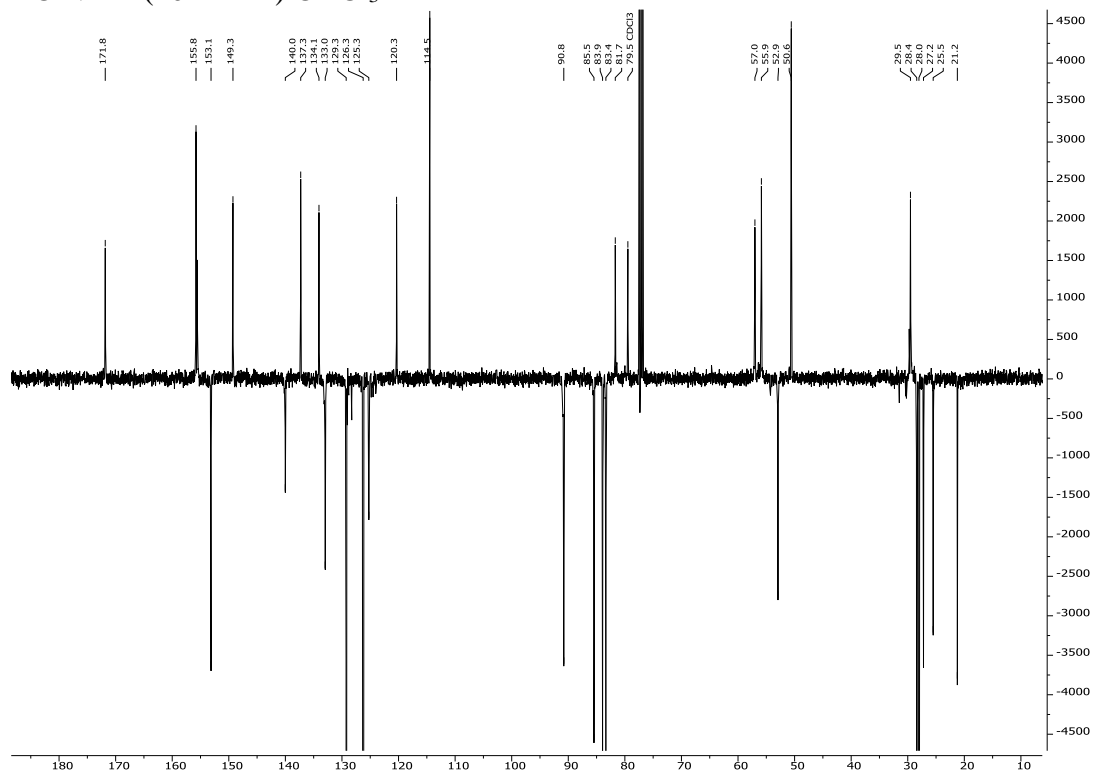

Compound **16y**  $^1\text{H}$  NMR (400 MHz)  $\text{CDCl}_3$

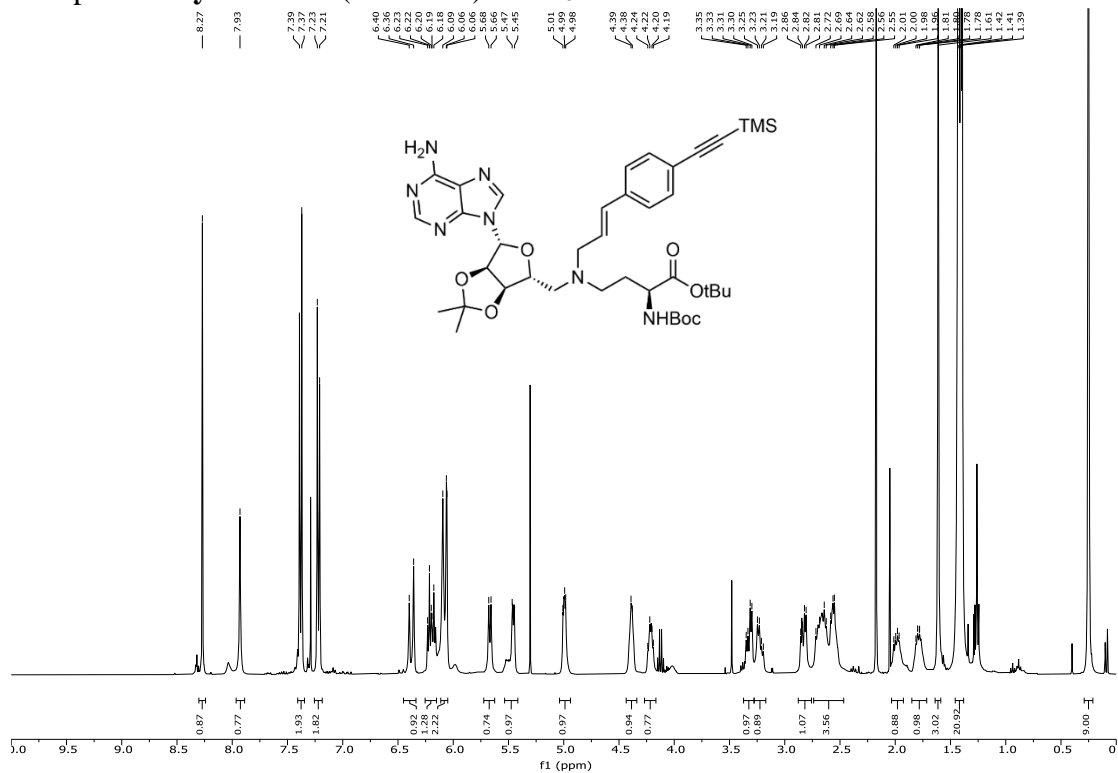

$^{13}\text{C}$  NMR (101 MHz)  $\text{CDCl}_3$

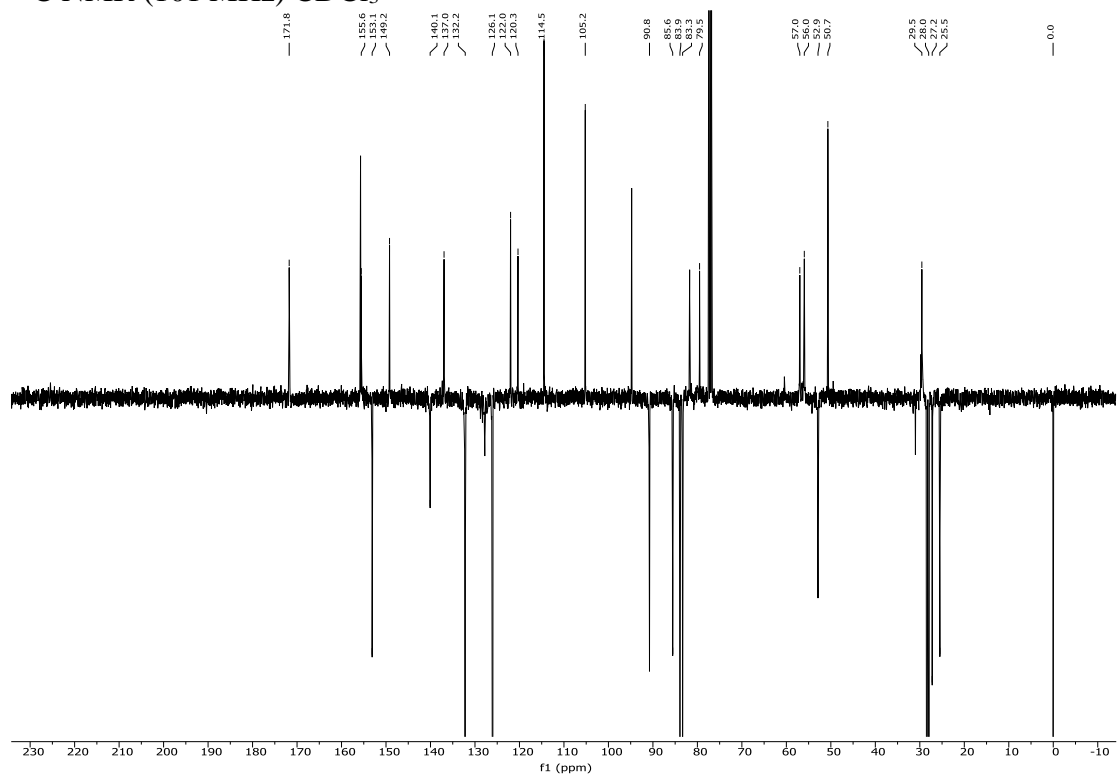

Compound **17a**  $^1\text{H}$  NMR (400 MHz)  $\text{CD}_3\text{OD}$

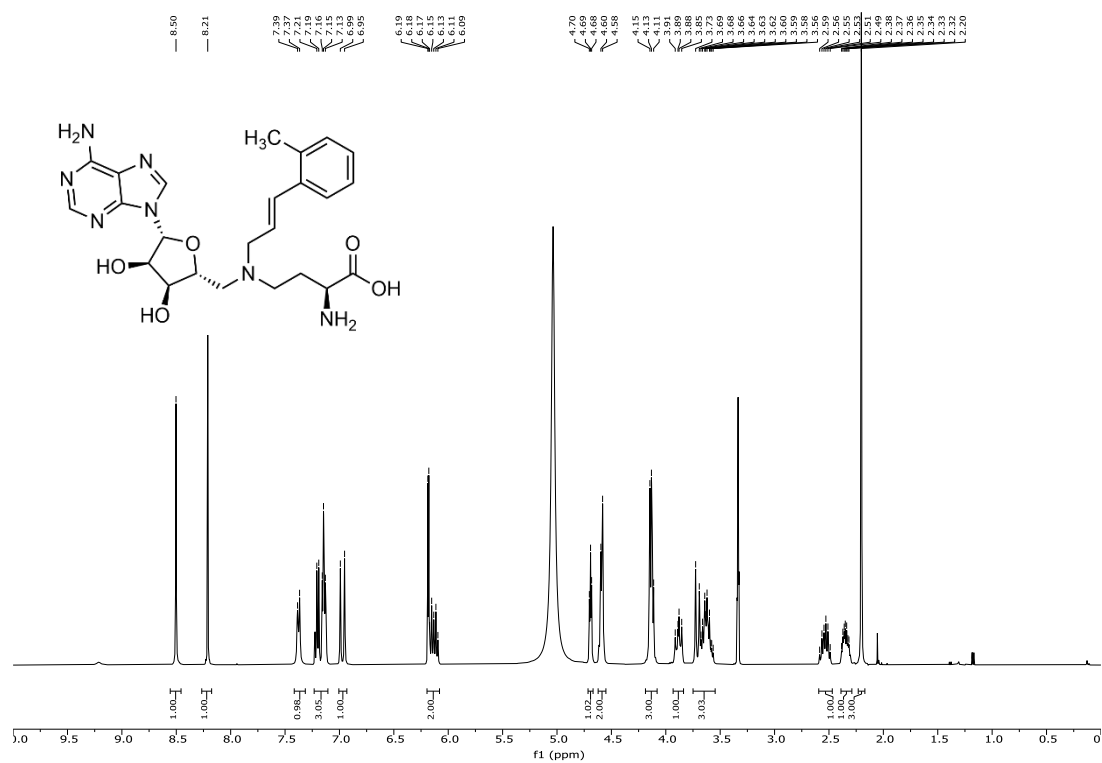

$^{13}\text{C}$  NMR (101 MHz)  $\text{CD}_3\text{OD}$

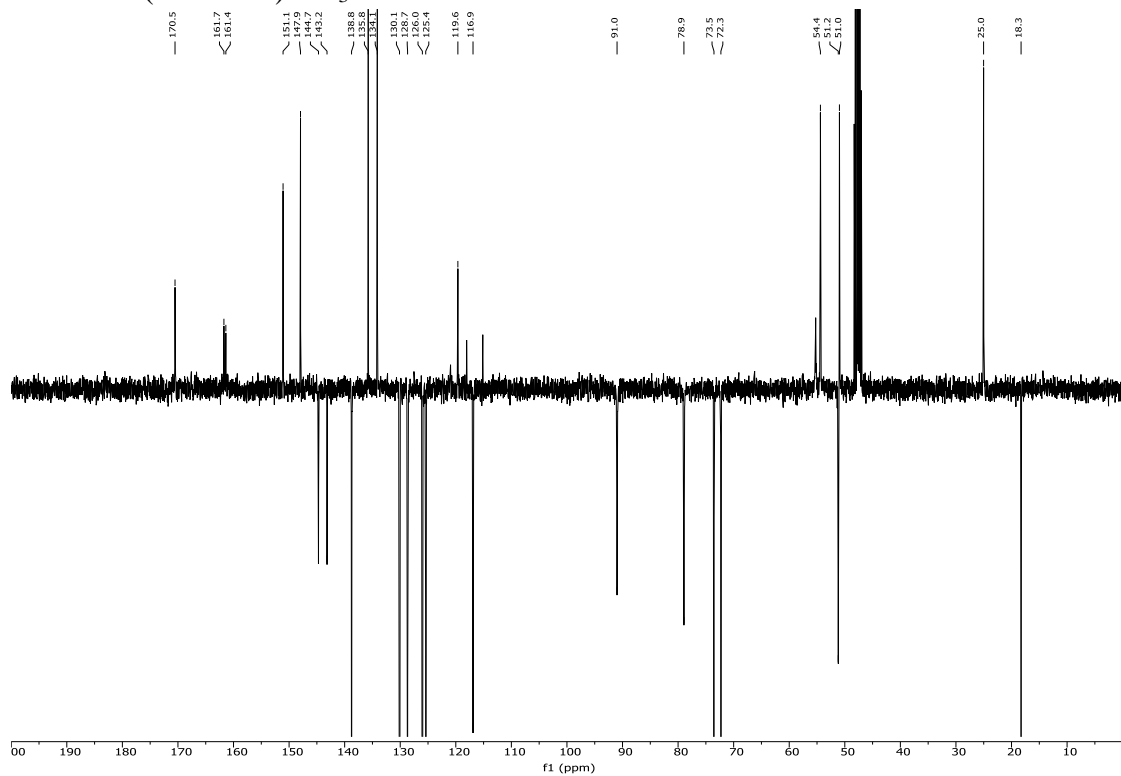

Compound **17b**  $^1\text{H}$  NMR (400 MHz)  $\text{CD}_3\text{OD}$

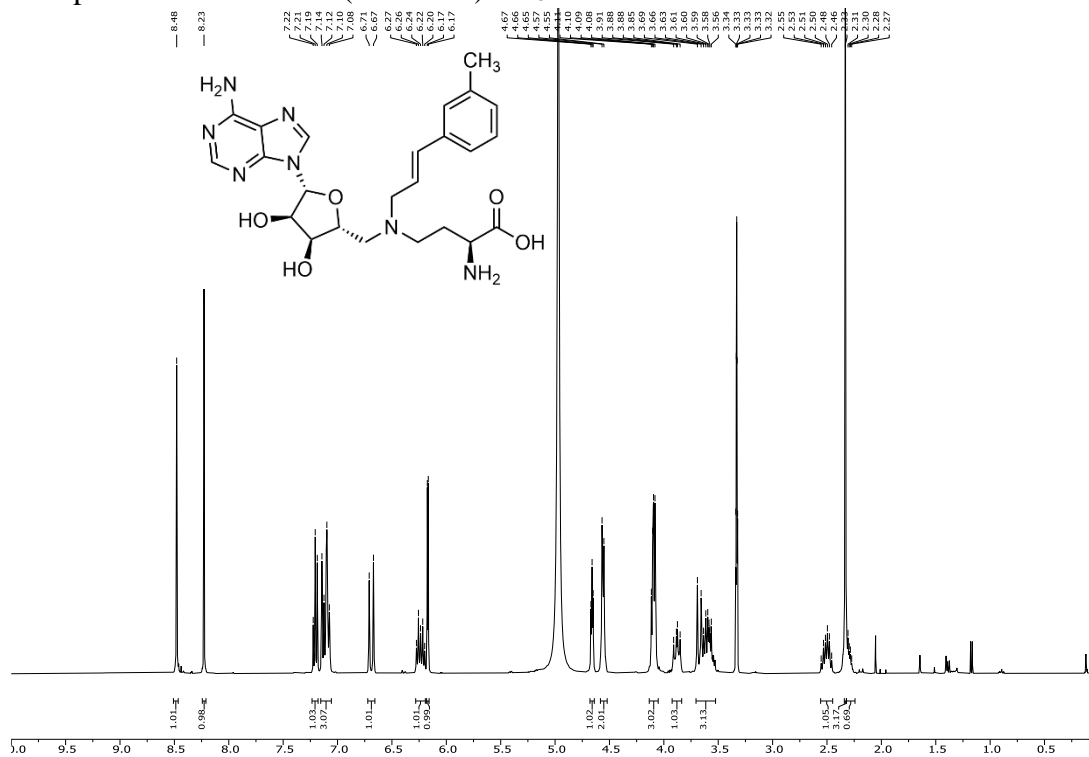

$^{13}\text{C}$  NMR (101 MHz)  $\text{CD}_3\text{OD}$

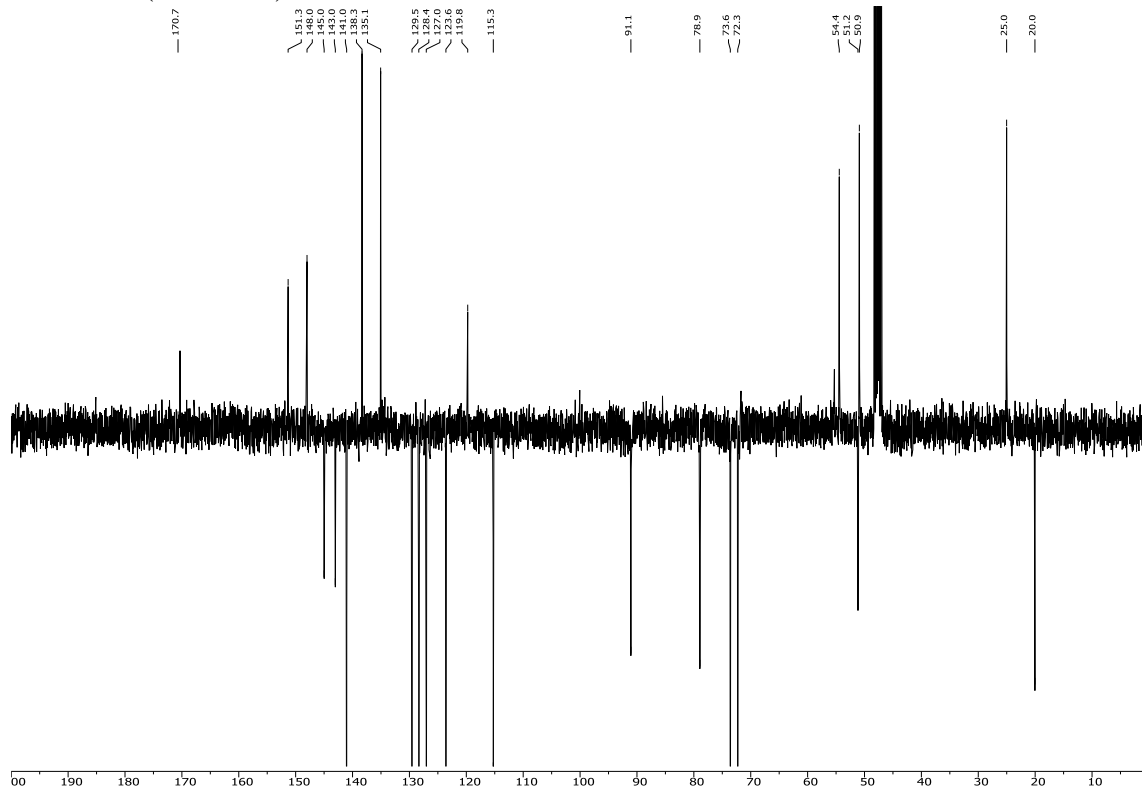

Compound **17c**  $^1\text{H}$  NMR (400 MHz)  $\text{D}_2\text{O}$

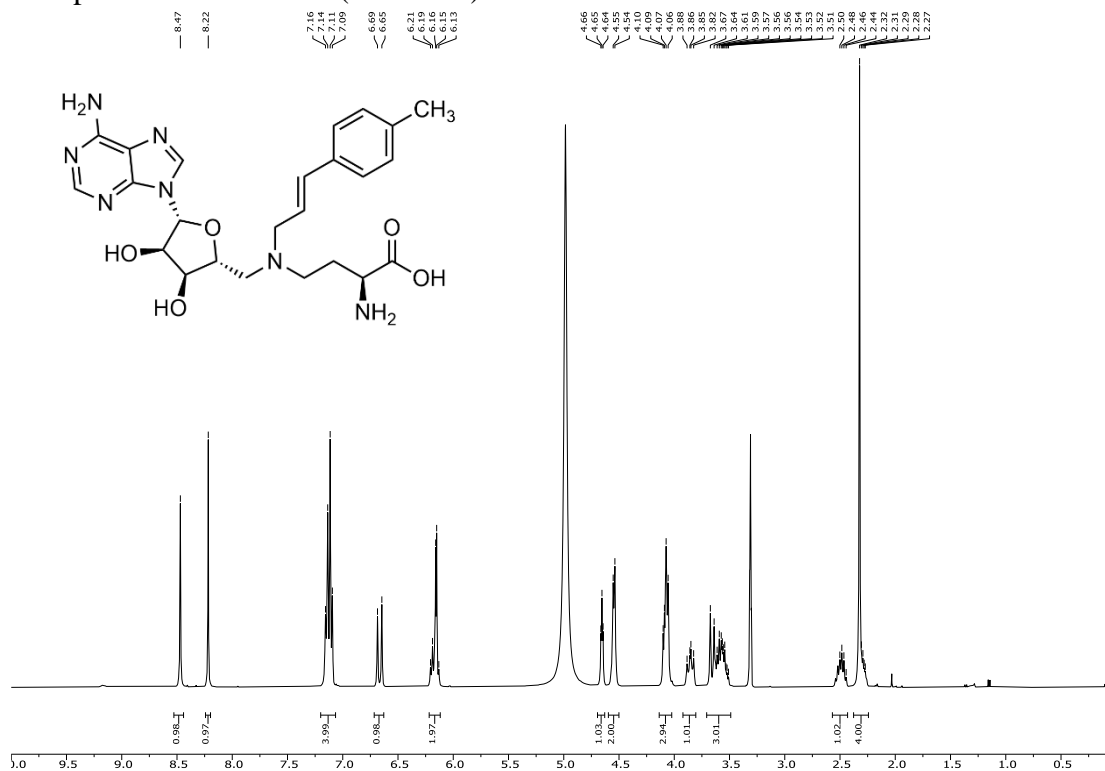

$^{13}\text{C}$  NMR (400 MHz)  $\text{D}_2\text{O}$

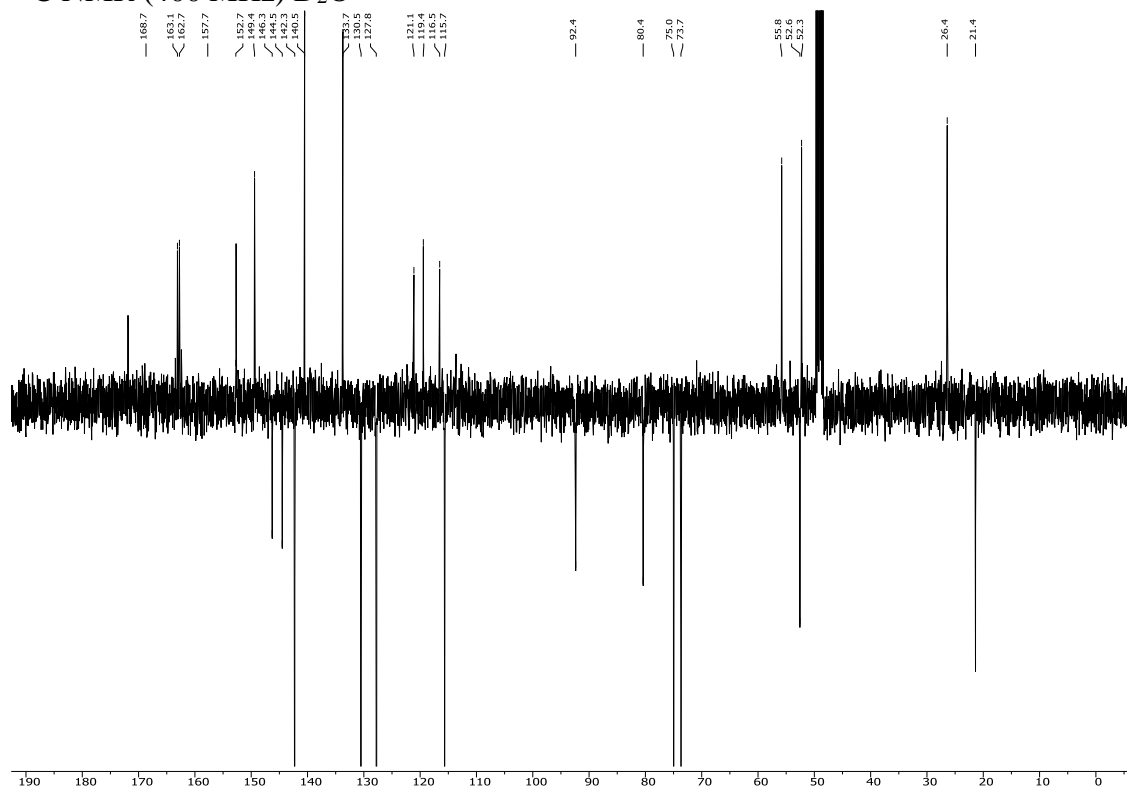

Compound **17d**  $^1\text{H}$  NMR (400 MHz)  $\text{CD}_3\text{OD}$

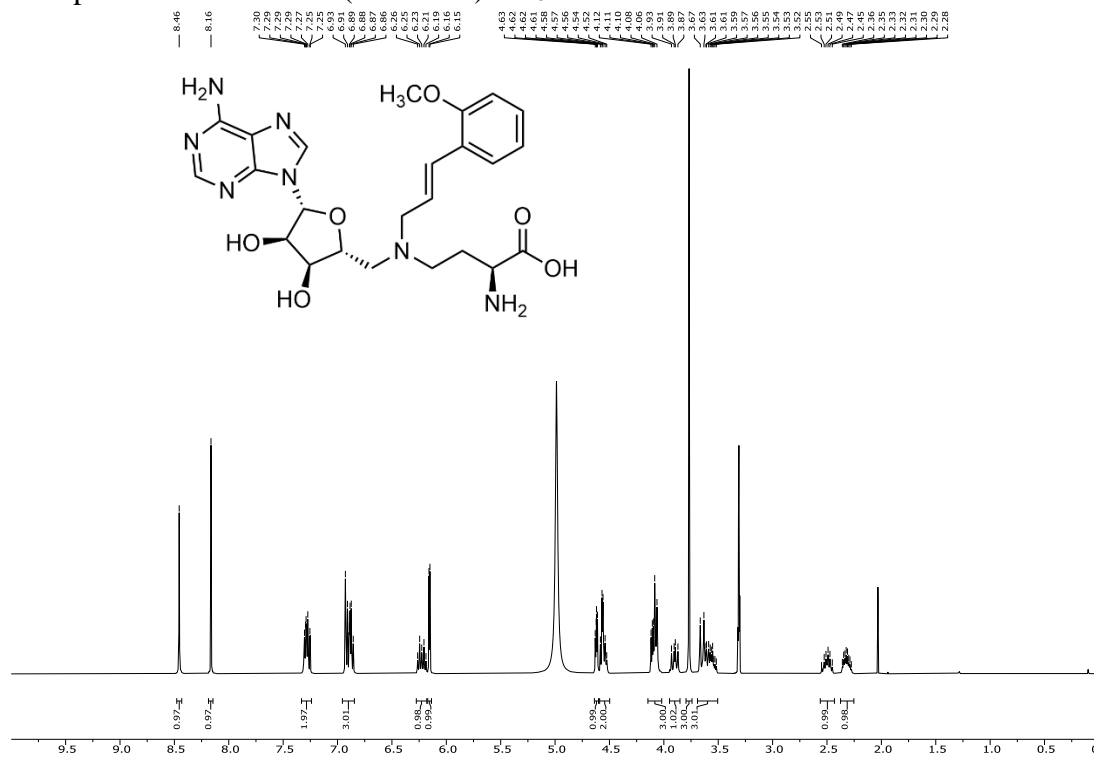

$^{13}\text{C}$  NMR (400 MHz)  $\text{CD}_3\text{OD}$

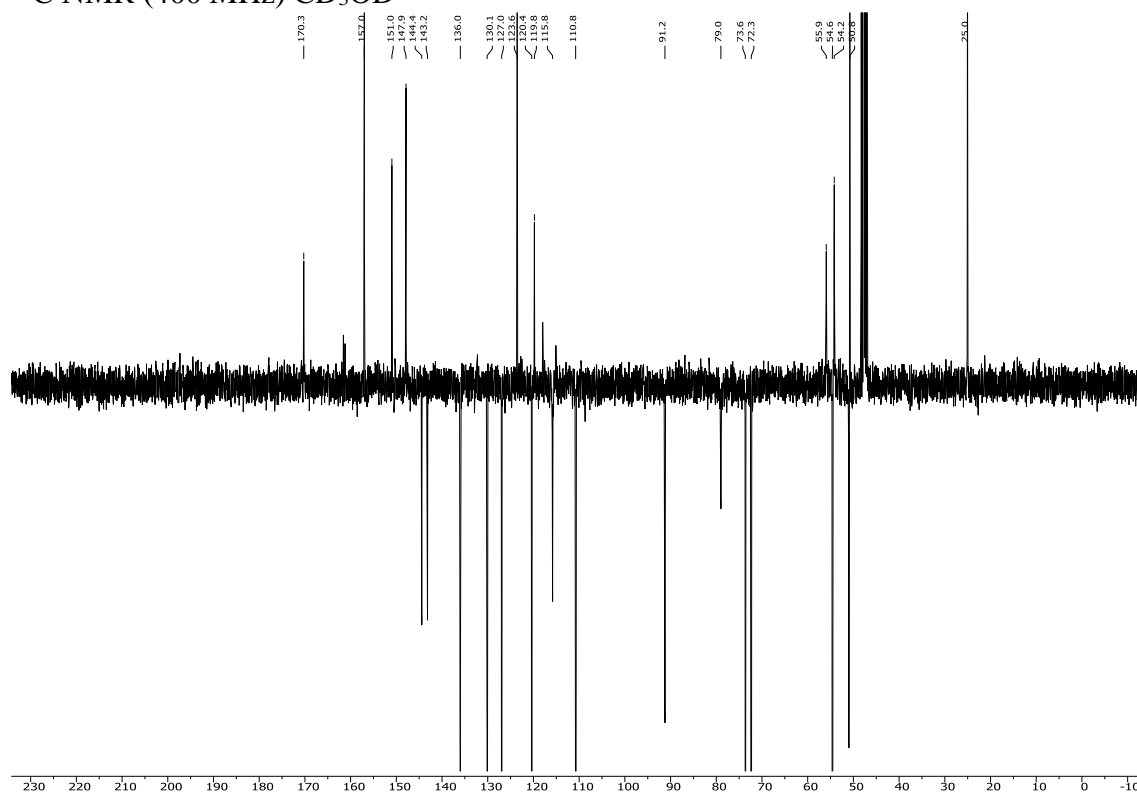



Compound **17e**  $^1\text{H}$  NMR (400 MHz)  $\text{CD}_3\text{OD}$

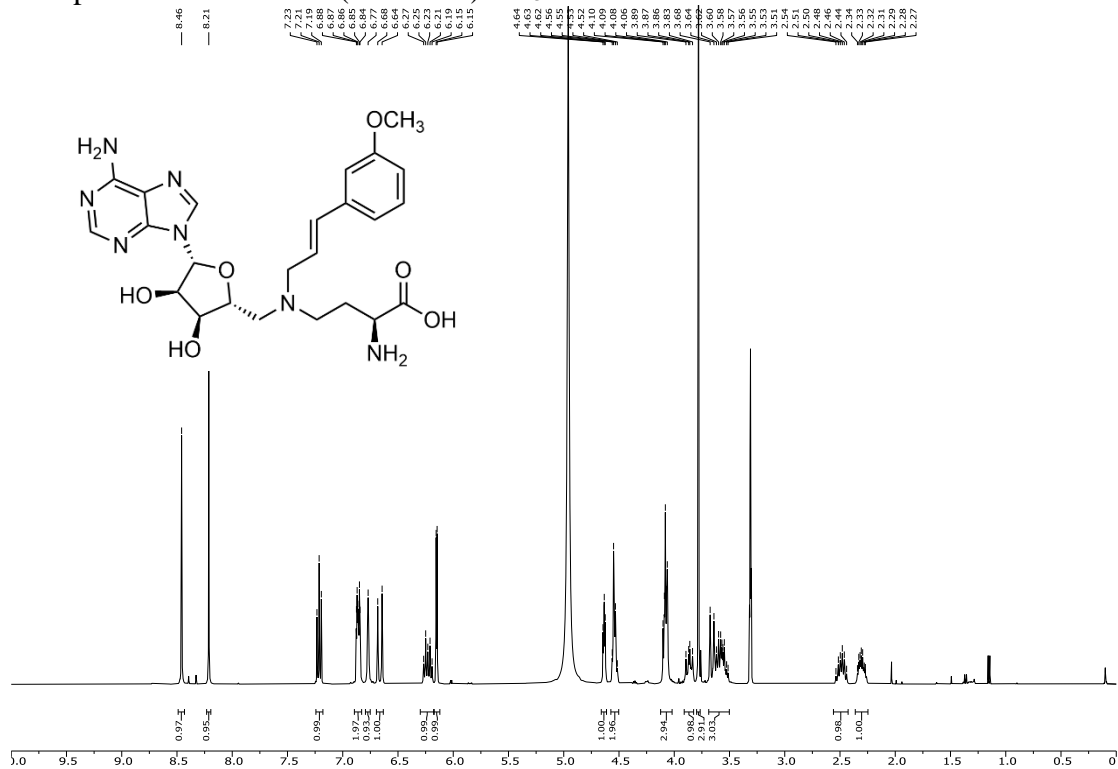

$^{13}\text{C}$  NMR (101 MHz)  $\text{CD}_3\text{OD}$

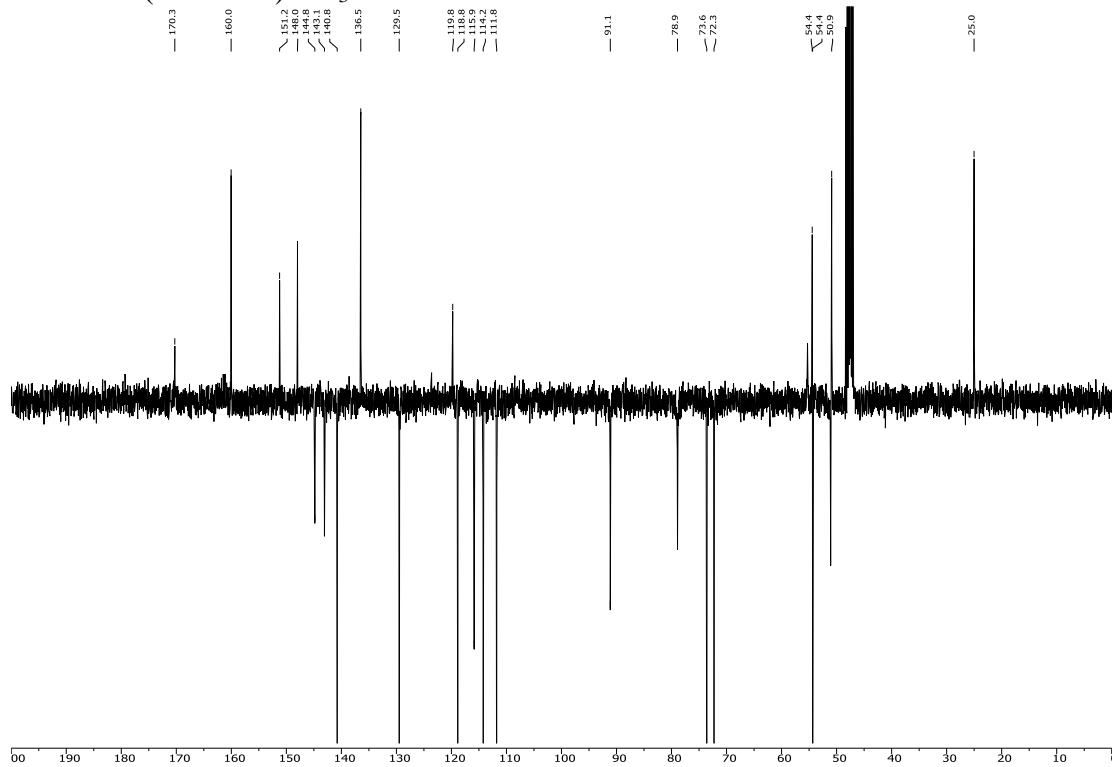

Compound **17f**  $^1\text{H}$  NMR (400 MHz)  $\text{D}_2\text{O}$

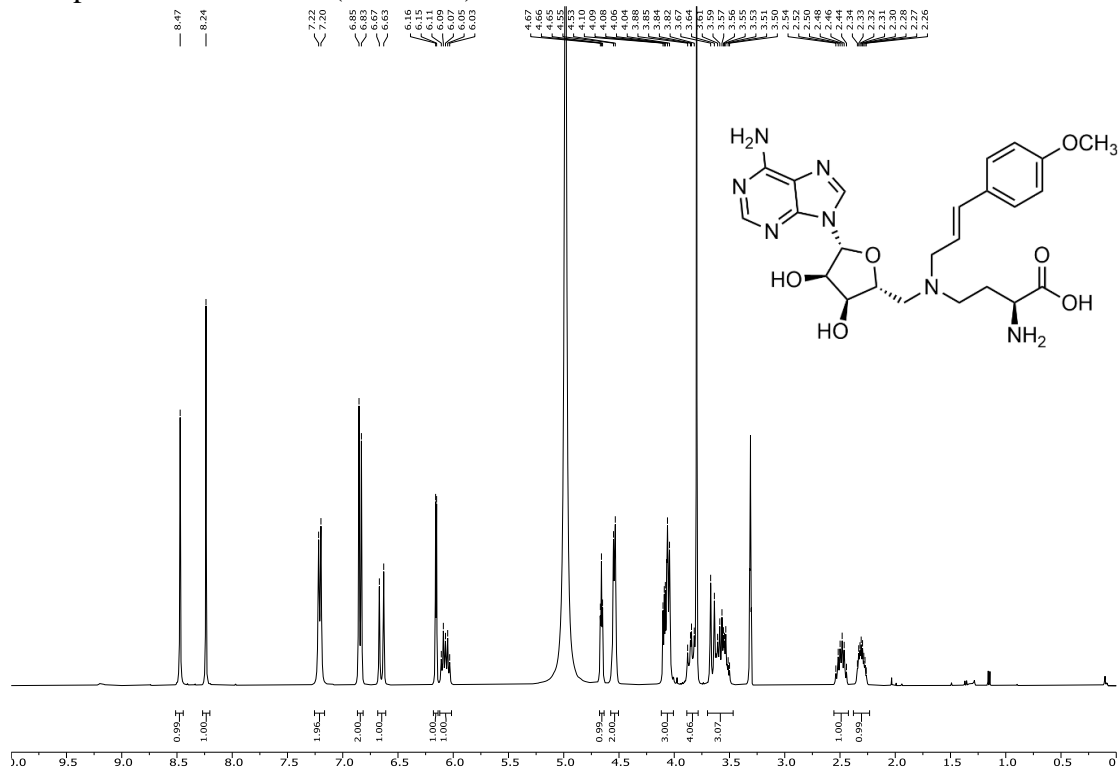

$^{13}\text{C}$  NMR (101 MHz)  $\text{D}_2\text{O}$

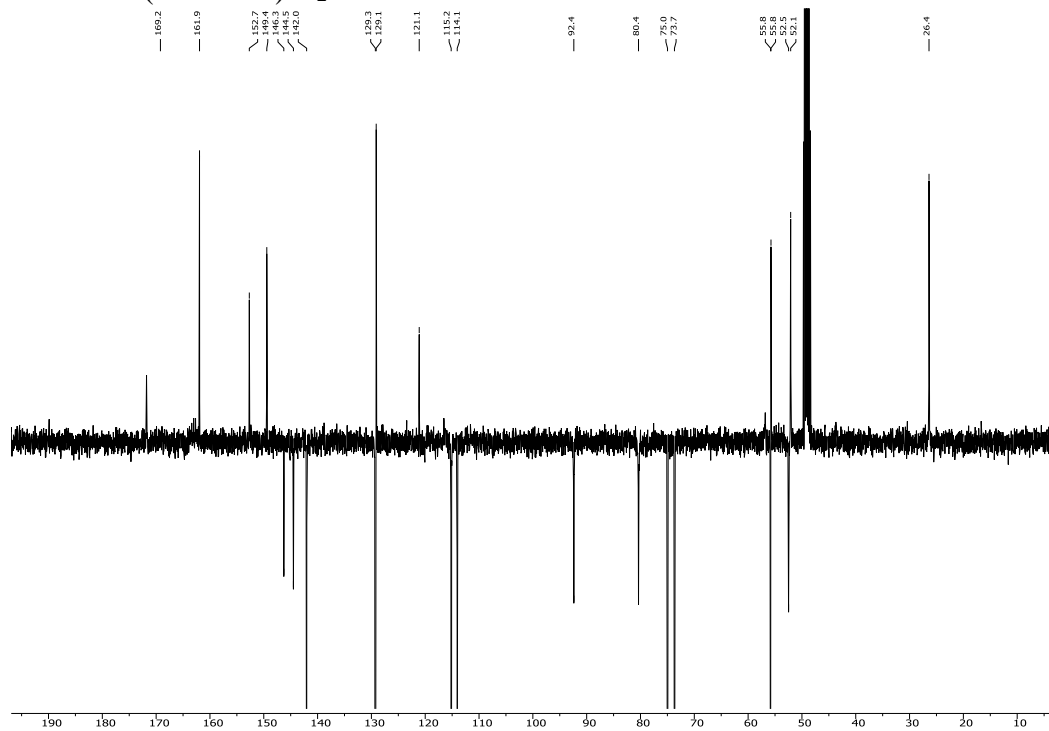

Compound **17g**  $^1\text{H}$  NMR (400 MHz)  $\text{D}_2\text{O}$

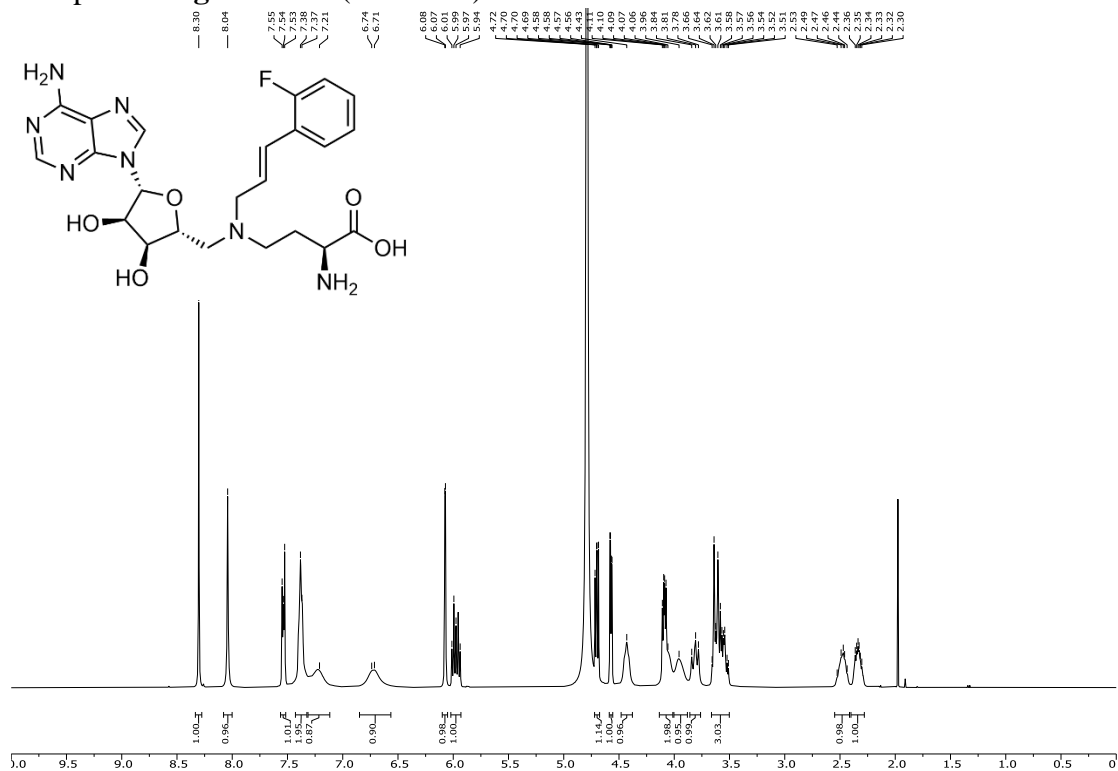

$^{13}\text{C}$  NMR (101 MHz)  $\text{D}_2\text{O}$

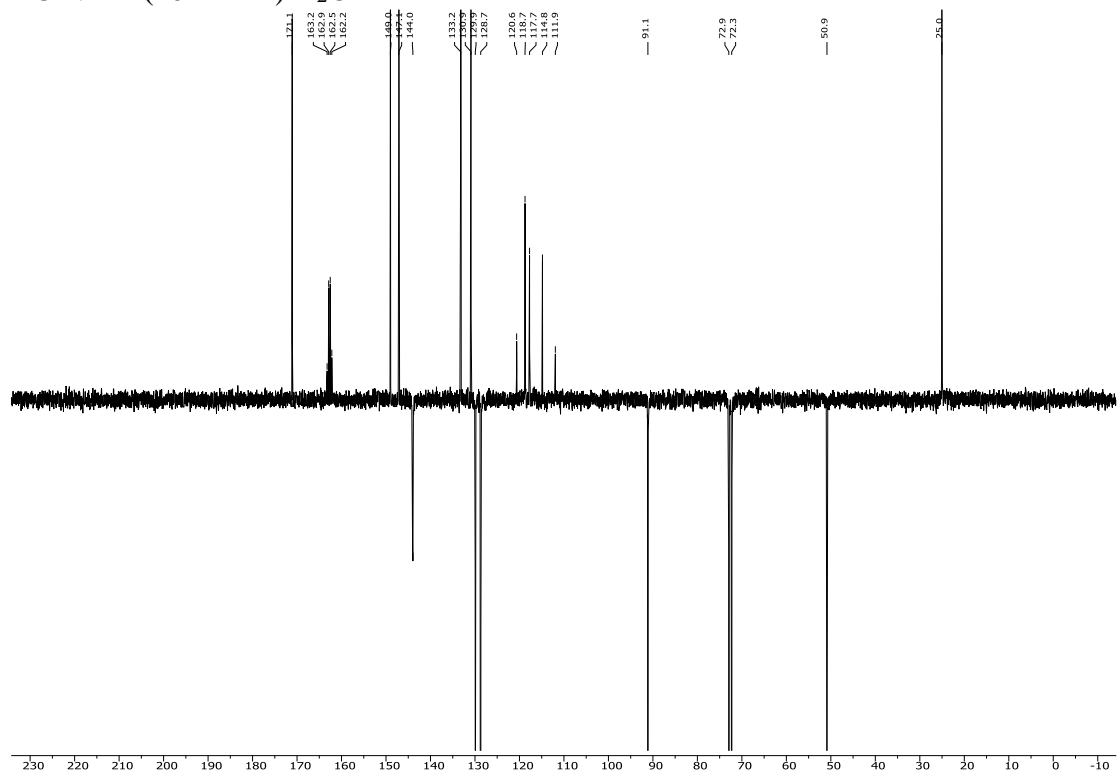

Compound **17h**  $^1\text{H}$  NMR (400 MHz)  $\text{D}_2\text{O}$

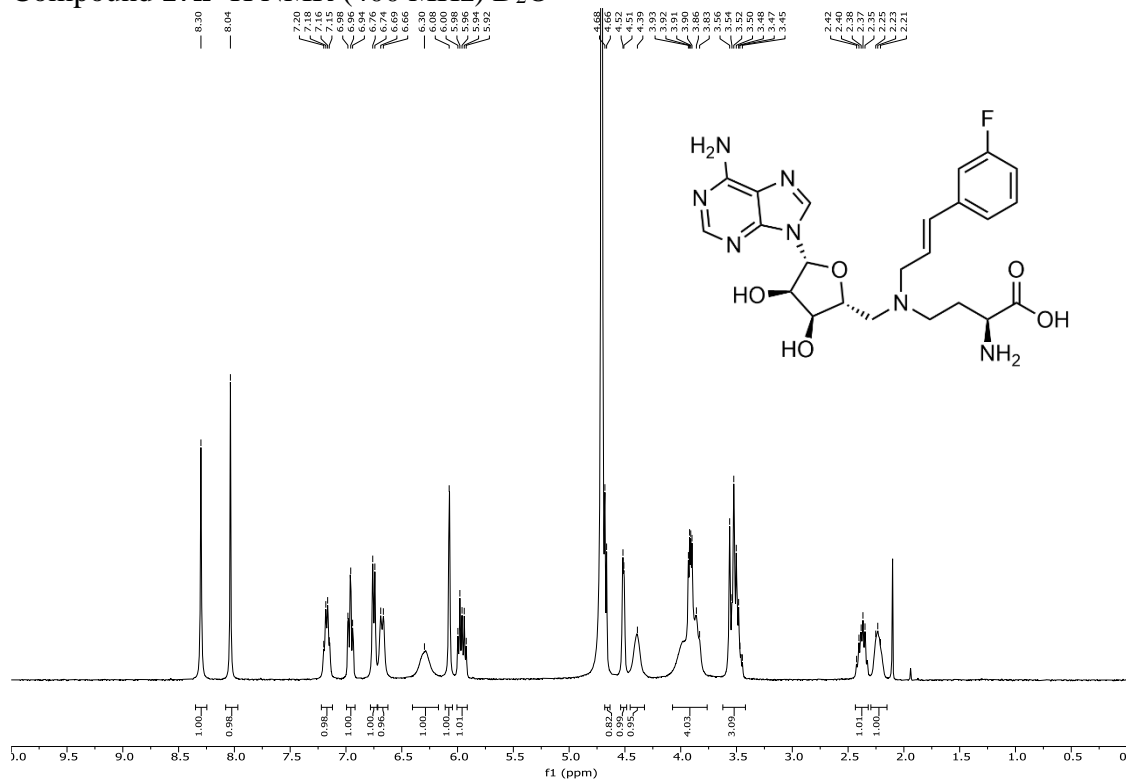

$^{13}\text{C}$  NMR (101 MHz)  $\text{D}_2\text{O}$

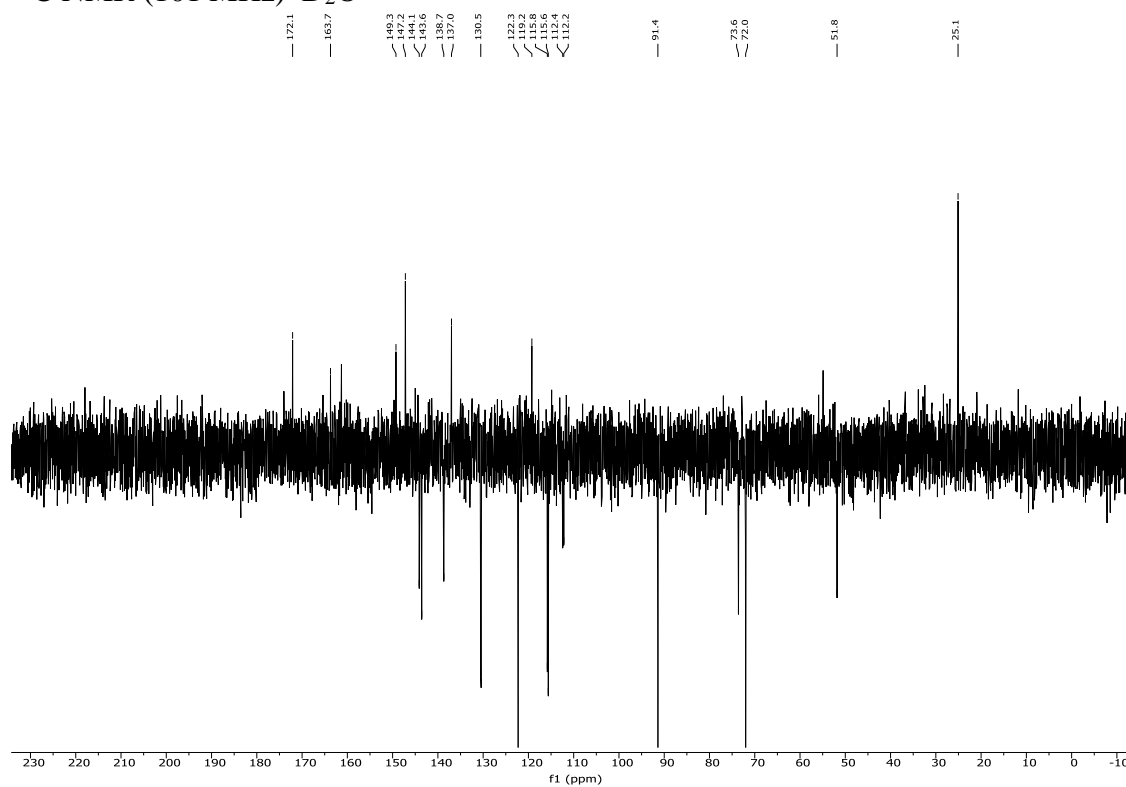

Compound **17i**  $^1\text{H}$  NMR (400 MHz)  $\text{D}_2\text{O}$

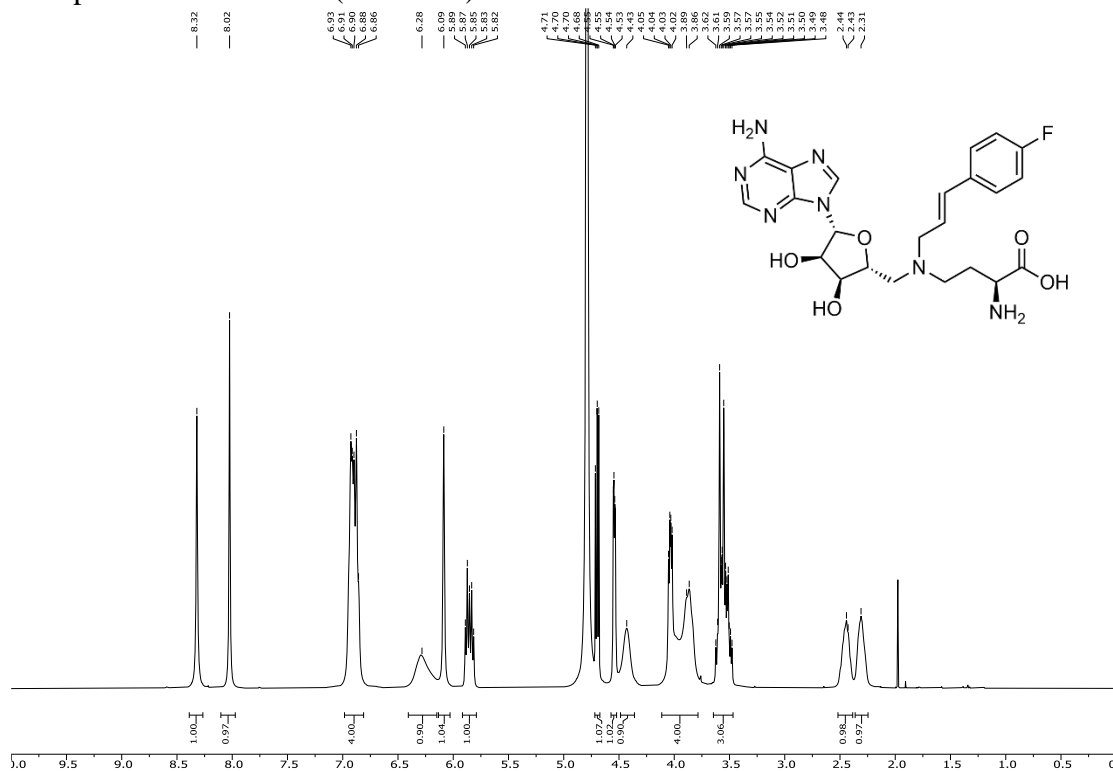

$^{13}\text{C}$  NMR (101 MHz)  $\text{D}_2\text{O}$

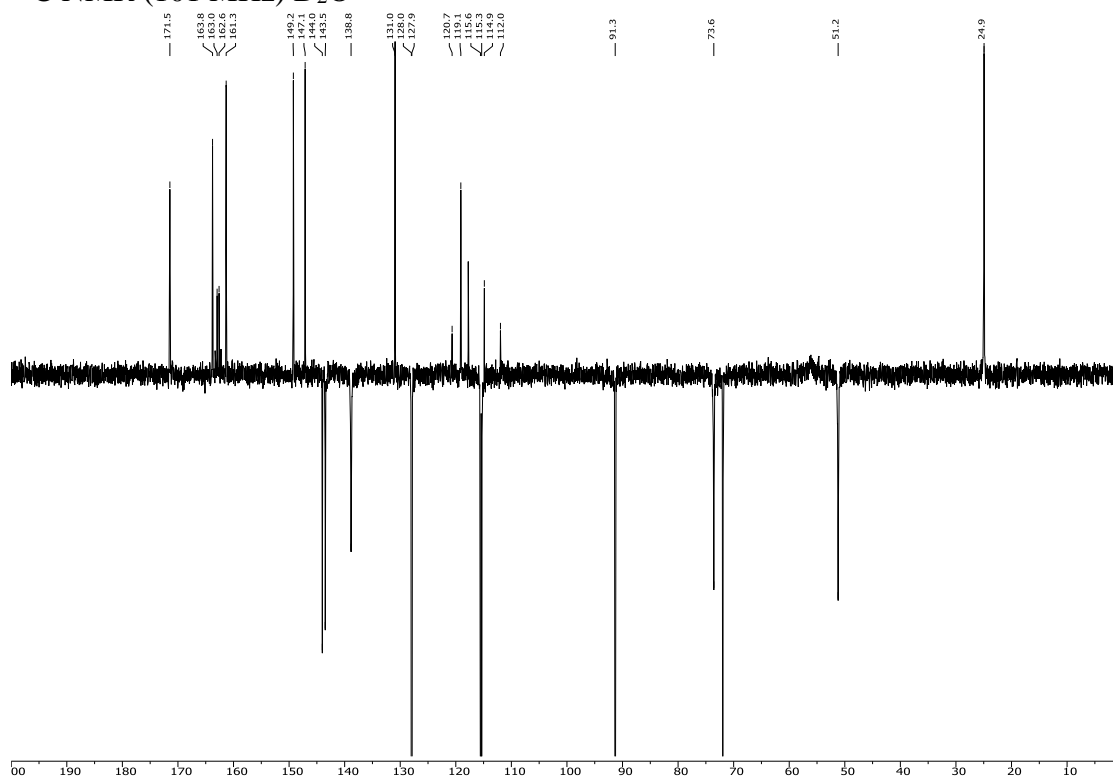

Compound **17j**  $^1\text{H}$  NMR (400 MHz)  $\text{D}_2\text{O}$

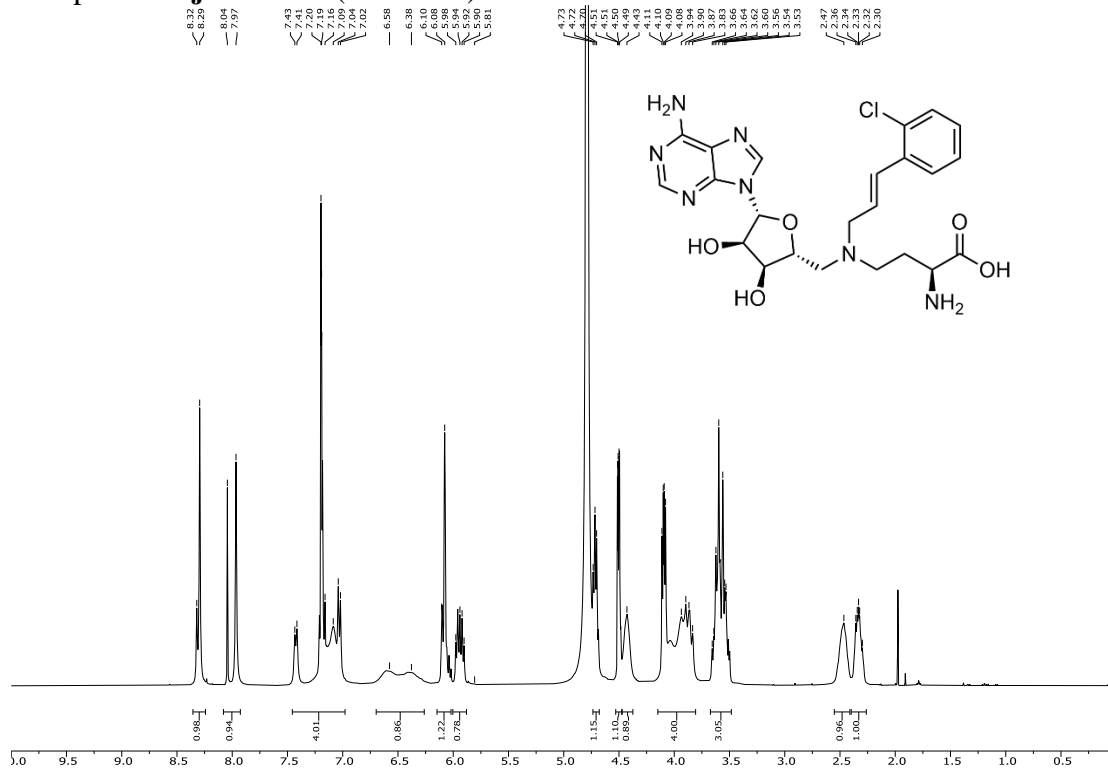

$^{13}\text{C}$  NMR (101 MHz)  $\text{D}_2\text{O}$

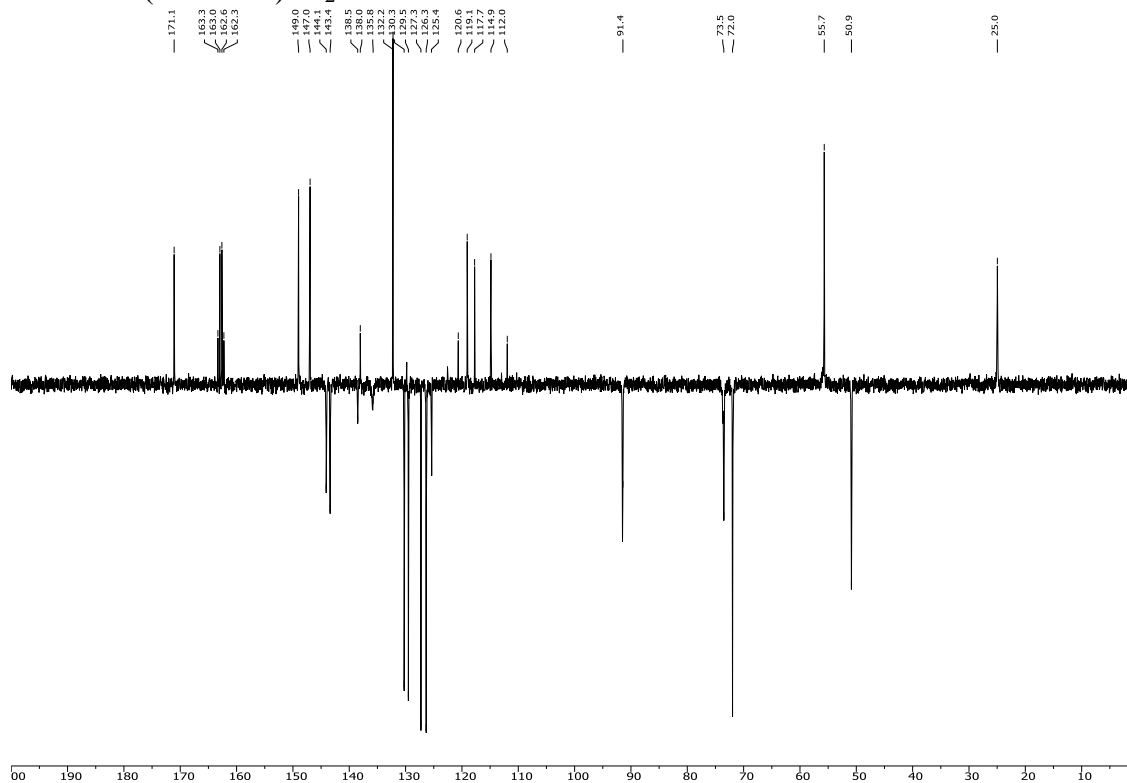

Compound **17k**  $^1\text{H}$  NMR (400 MHz)  $\text{CD}_3\text{OD}$

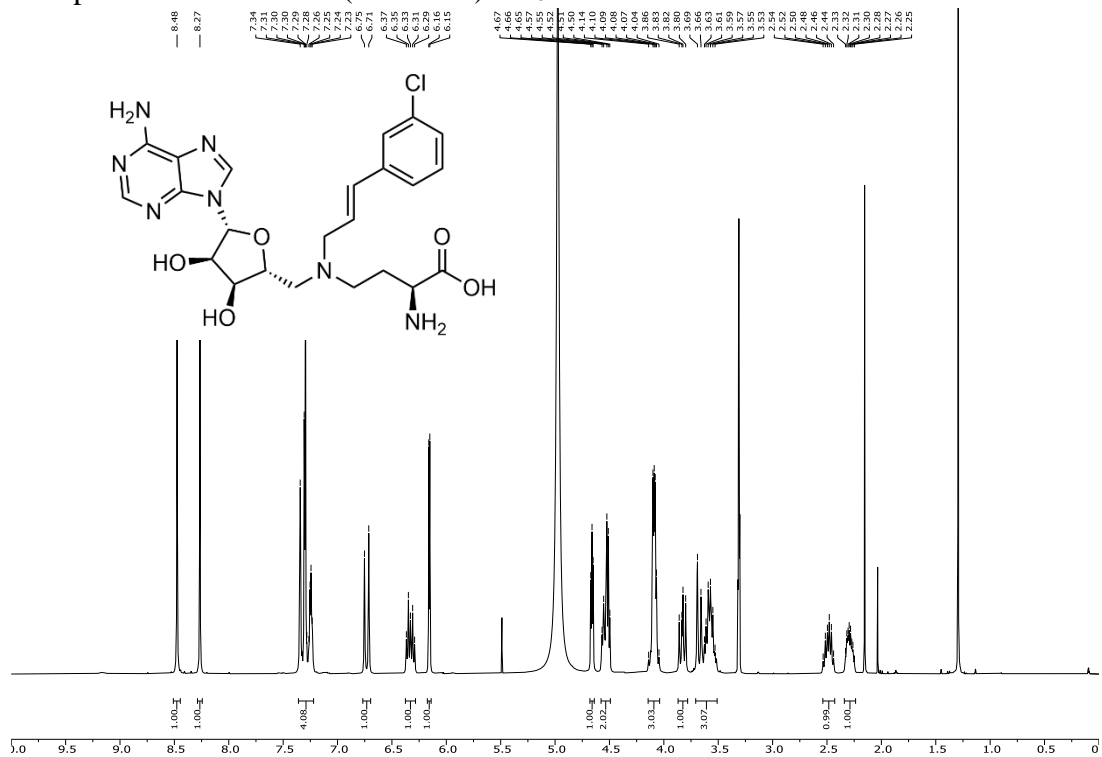

$^{13}\text{C}$  NMR (101 MHz)  $\text{CD}_3\text{OD}$

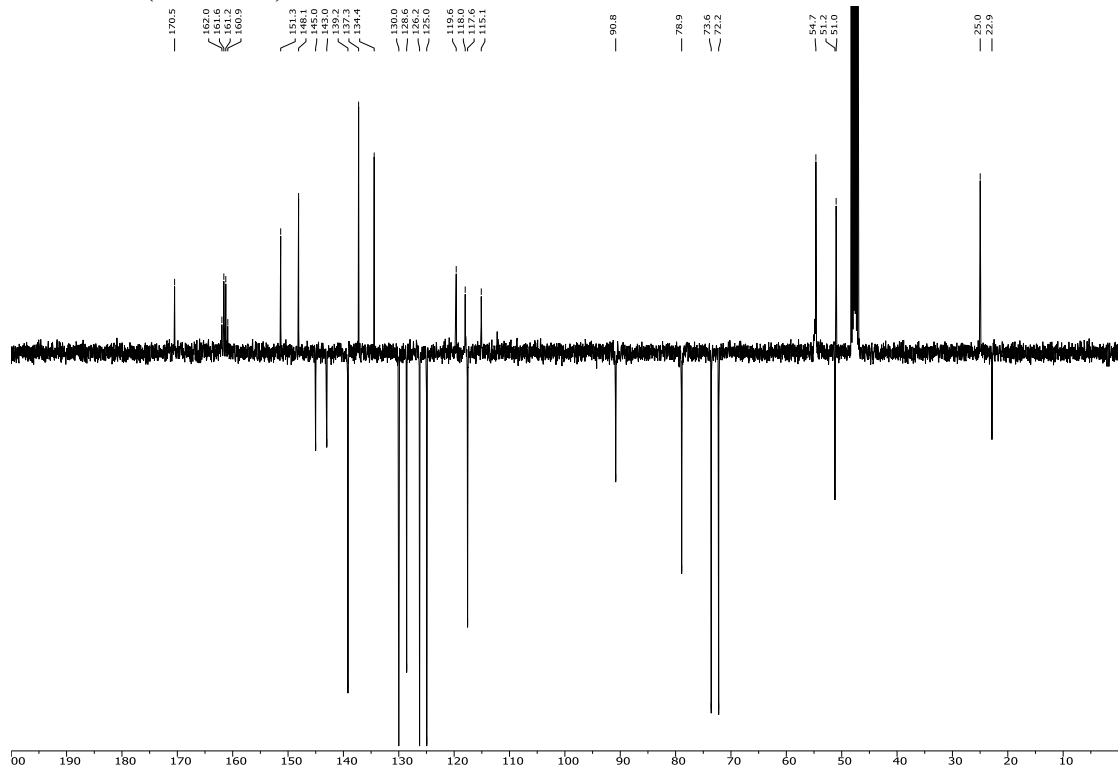

Compound **171**  $^1\text{H}$  NMR (400 MHz)  $\text{D}_2\text{O}$

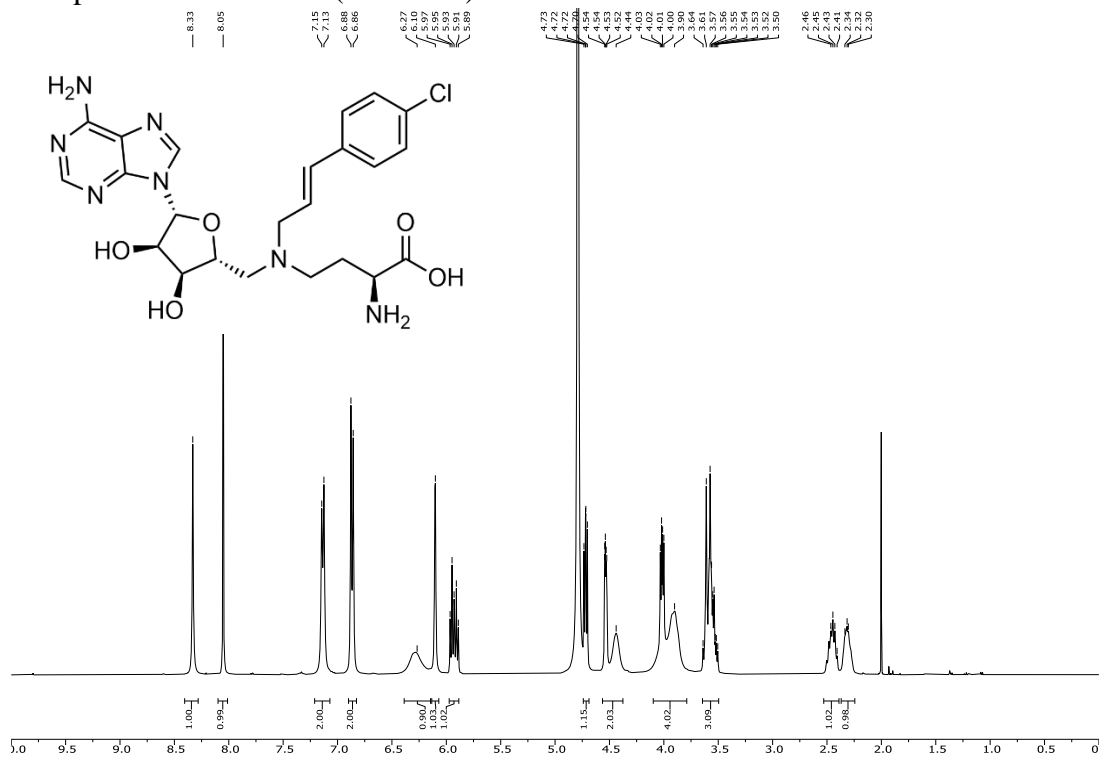

$^{13}\text{C}$  NMR (101 MHz)  $\text{D}_2\text{O}$

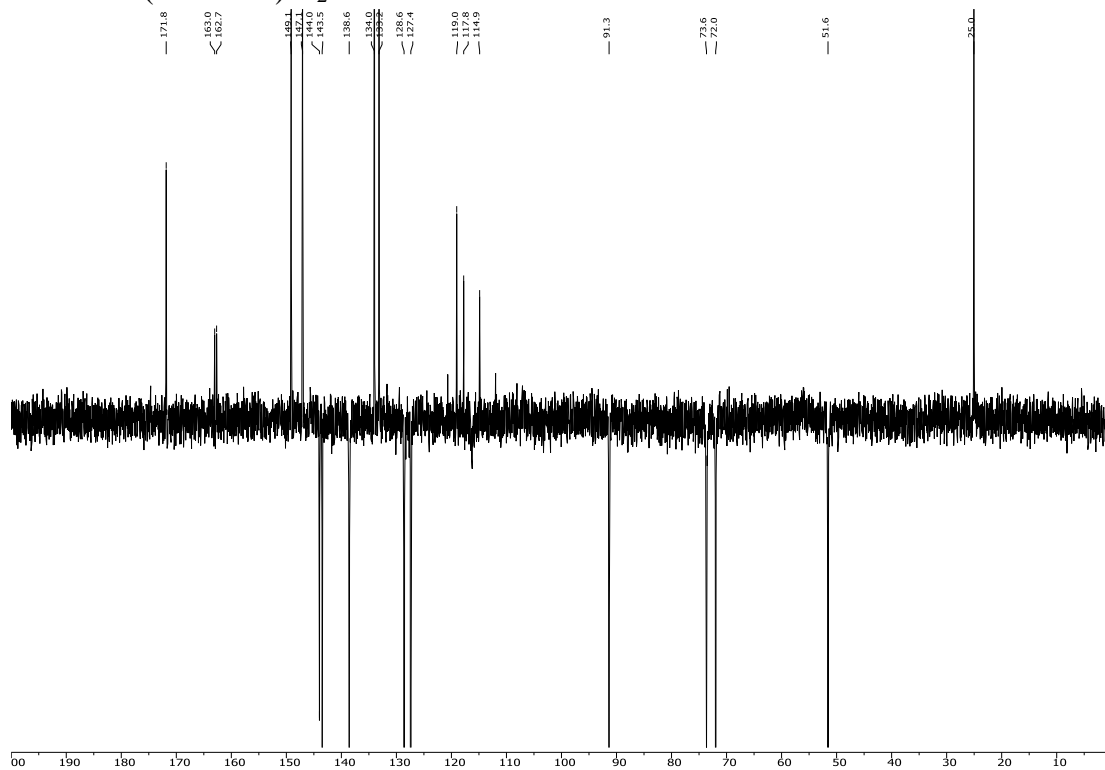



Compound **17m**  $^1\text{H}$  NMR (400 MHz)  $\text{D}_2\text{O}$

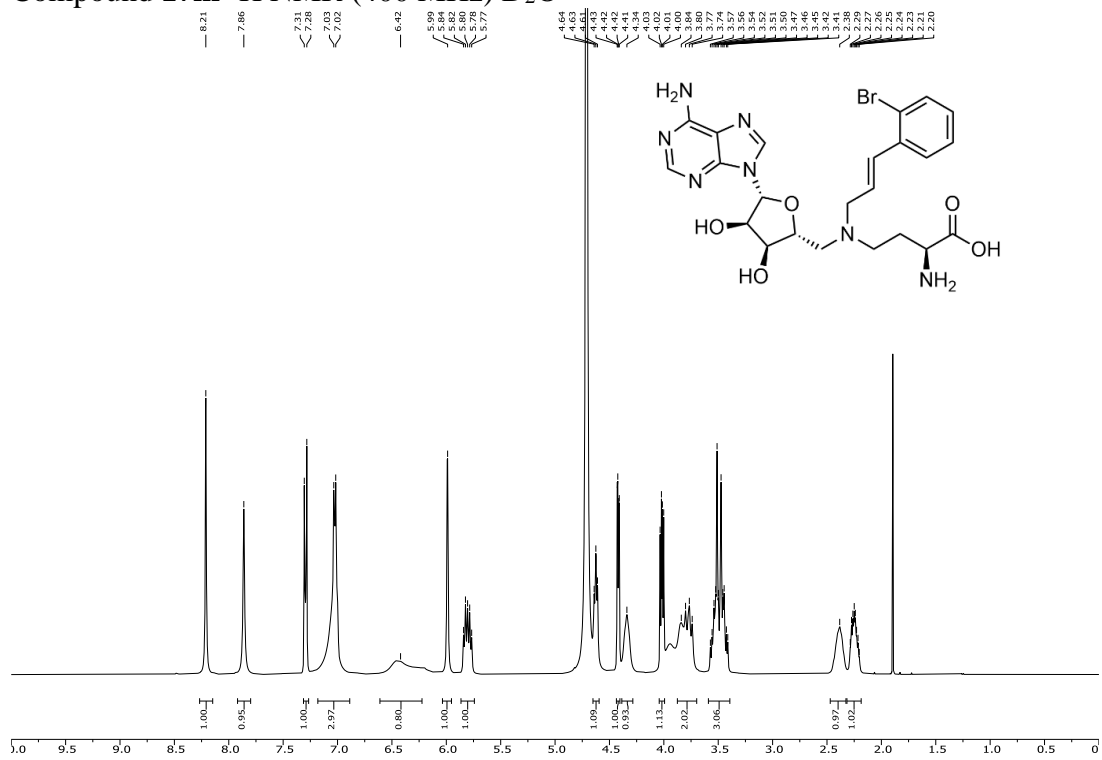

$^{13}\text{C}$  NMR (101MHz)  $\text{D}_2\text{O}$

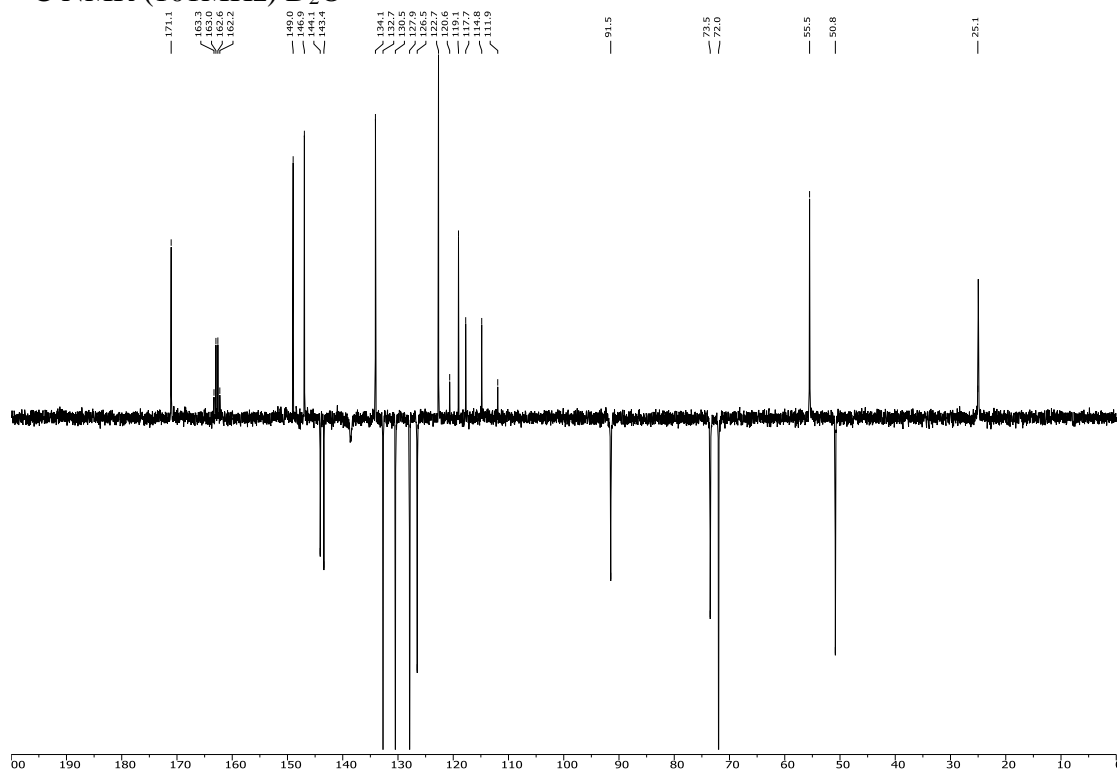

Compound **17n**  $^1\text{H}$  NMR (400 MHz)  $\text{D}_2\text{O}$

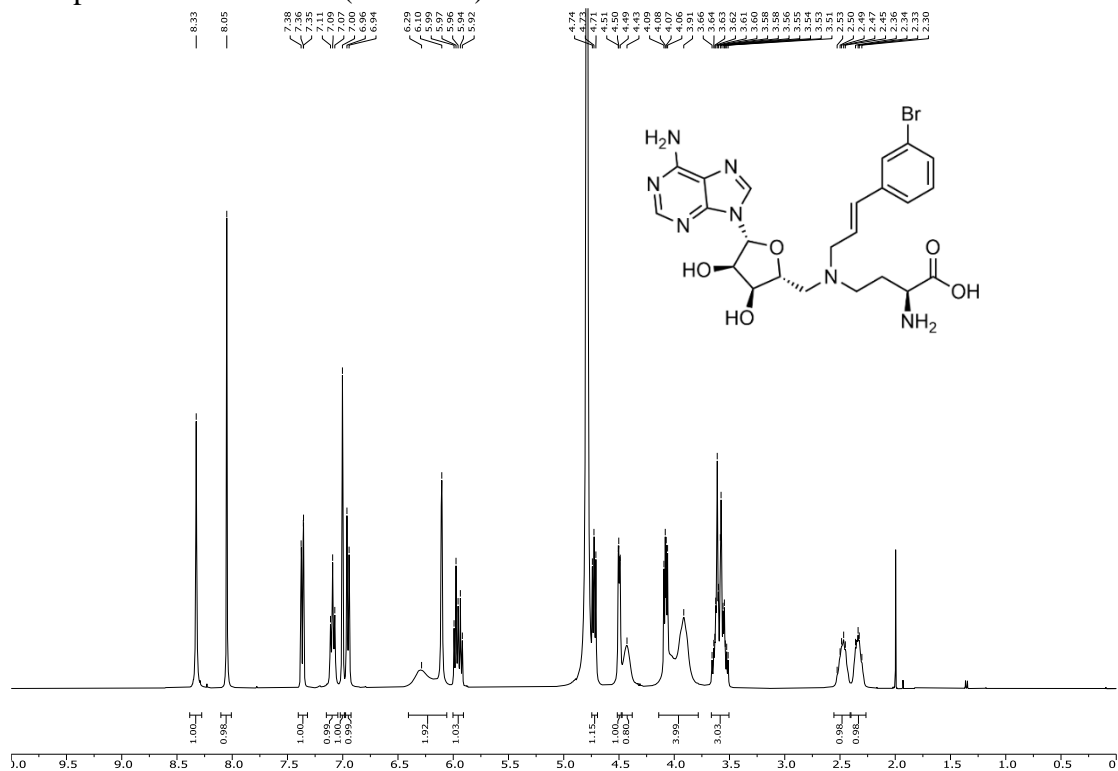

$^{13}\text{C}$  NMR (101 MHz)  $\text{D}_2\text{O}$

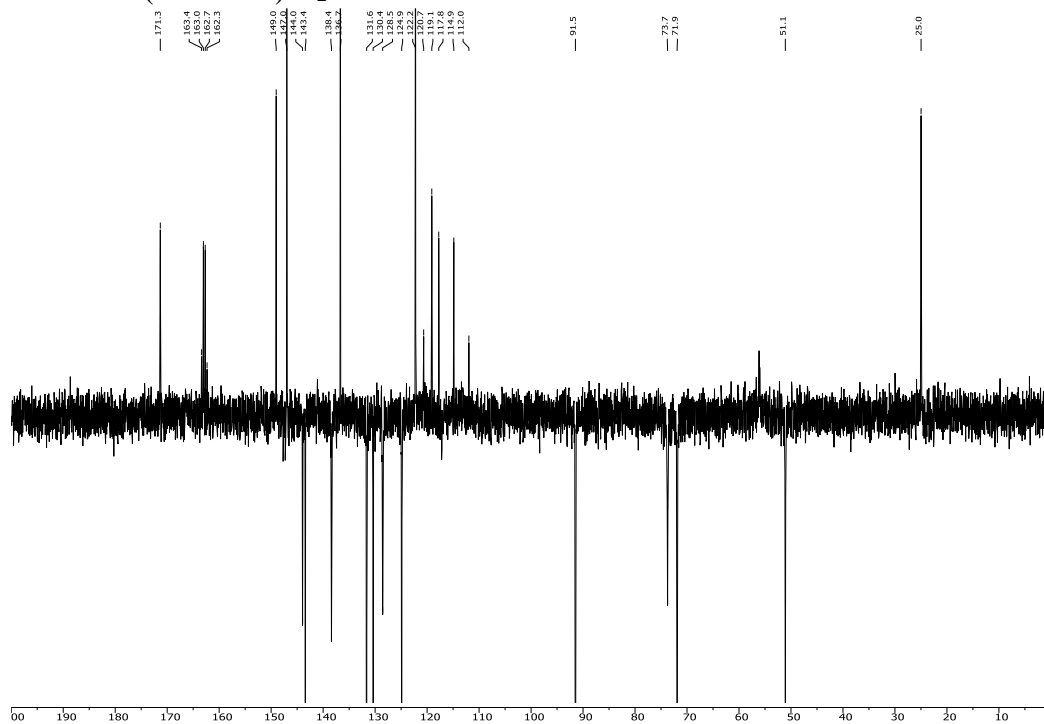

Compound **17o**  $^1\text{H}$  NMR (400 MHz)  $\text{D}_2\text{O}$

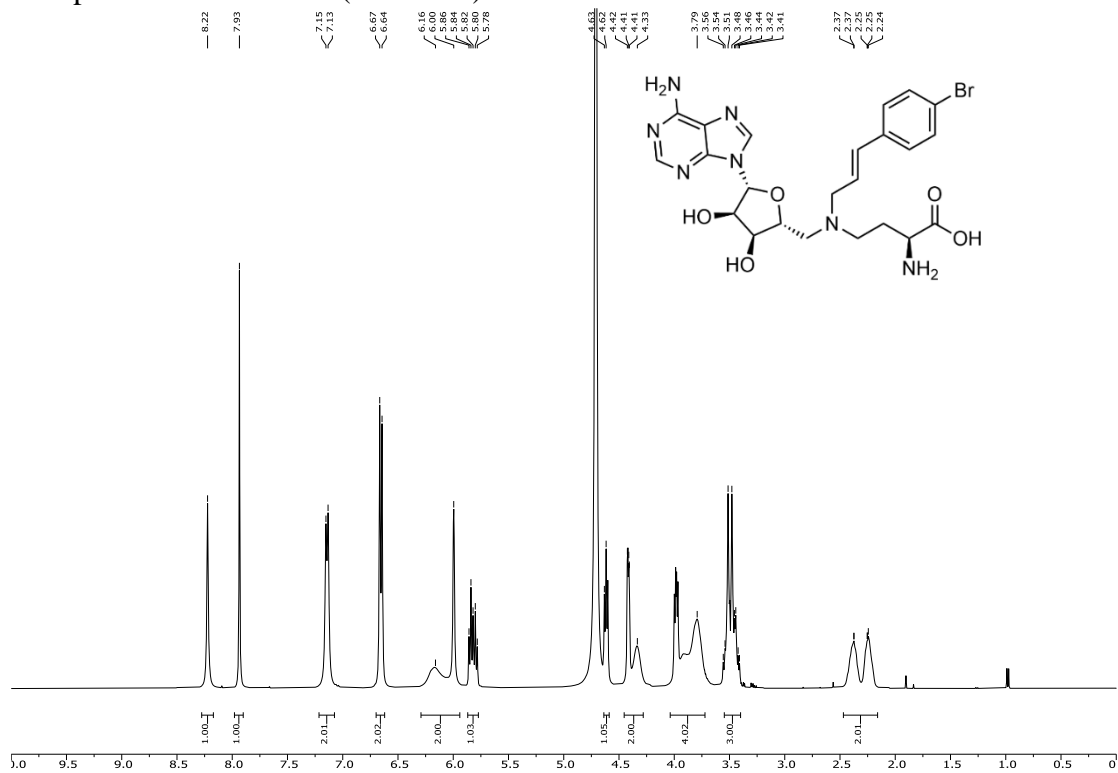

$^{13}\text{C}$  NMR (101 MHz)  $\text{D}_2\text{O}$

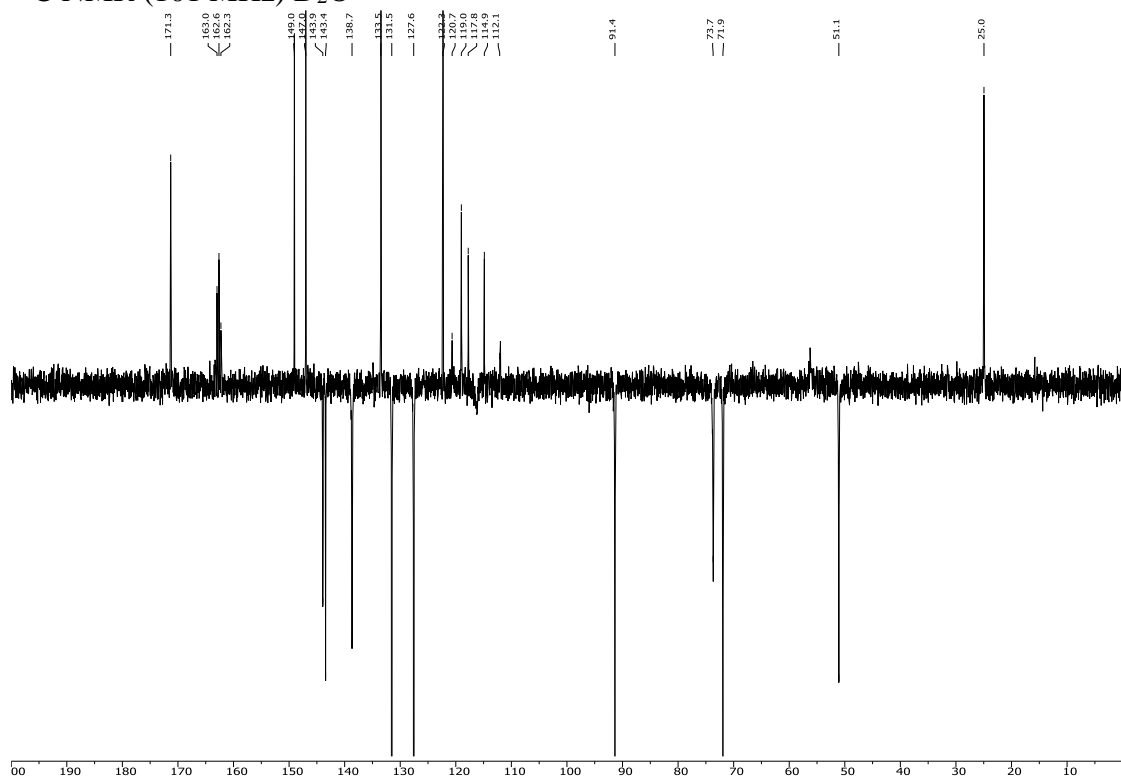

Compound **17p**  $^1\text{H}$  NMR (400 MHz)  $\text{D}_2\text{O}$

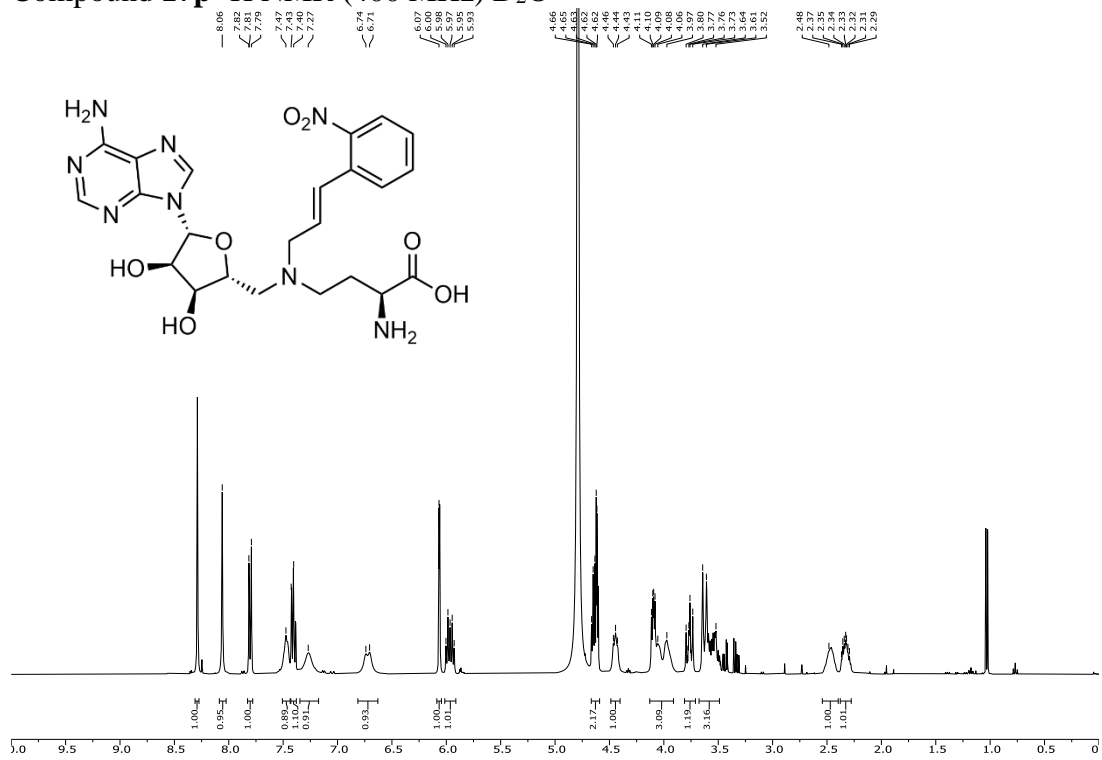

$^{13}\text{C}$  NMR (101 MHz)  $\text{D}_2\text{O}$

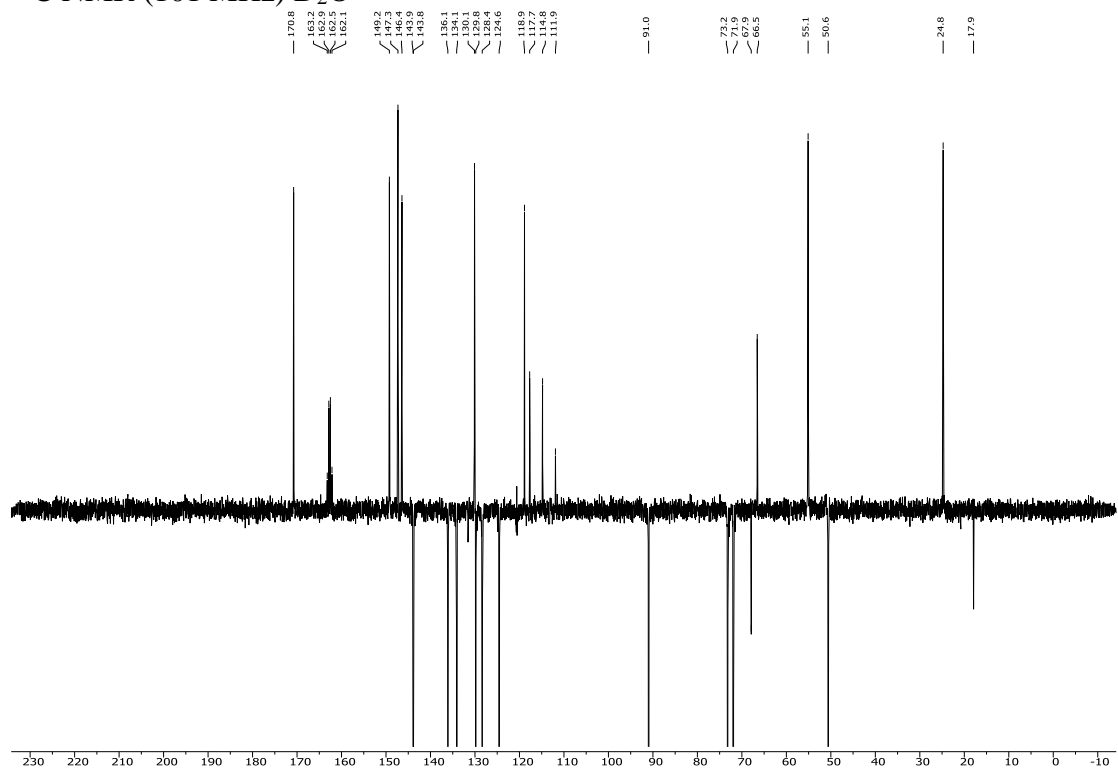

Compound **17q**  $^1\text{H}$  NMR (500 MHz)  $\text{CD}_3\text{OD}$

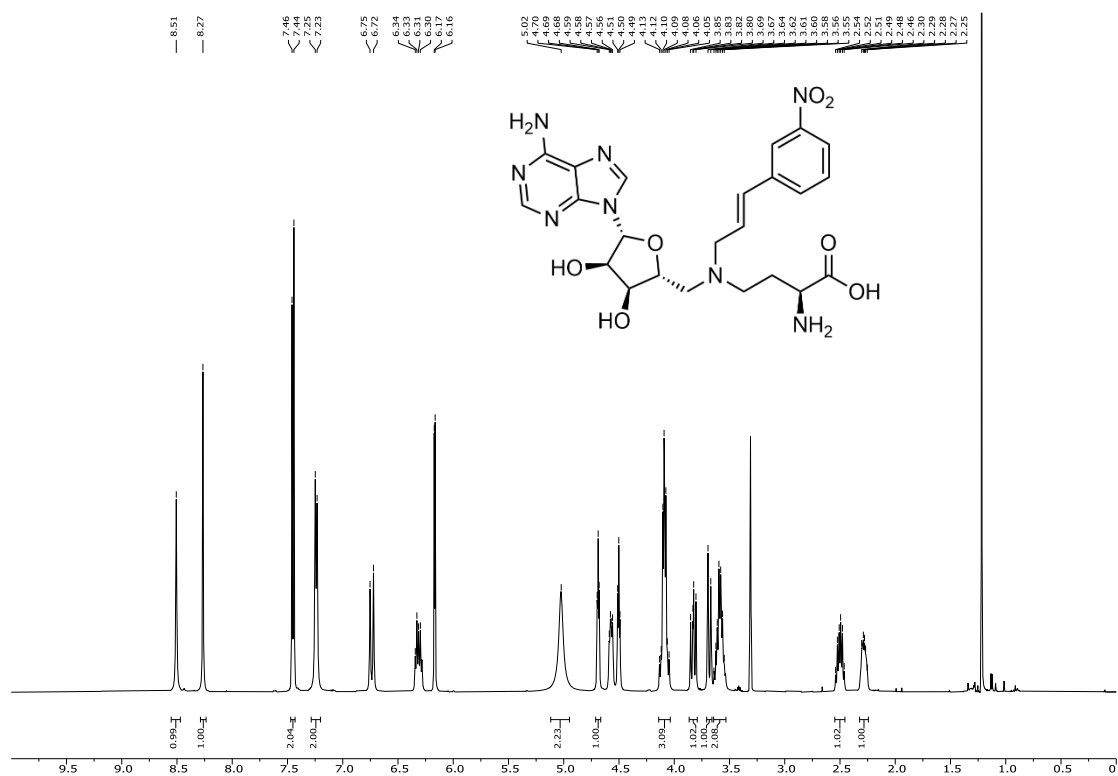

$^{13}\text{C}$  NMR (126 MHz)  $\text{CD}_3\text{OD}$

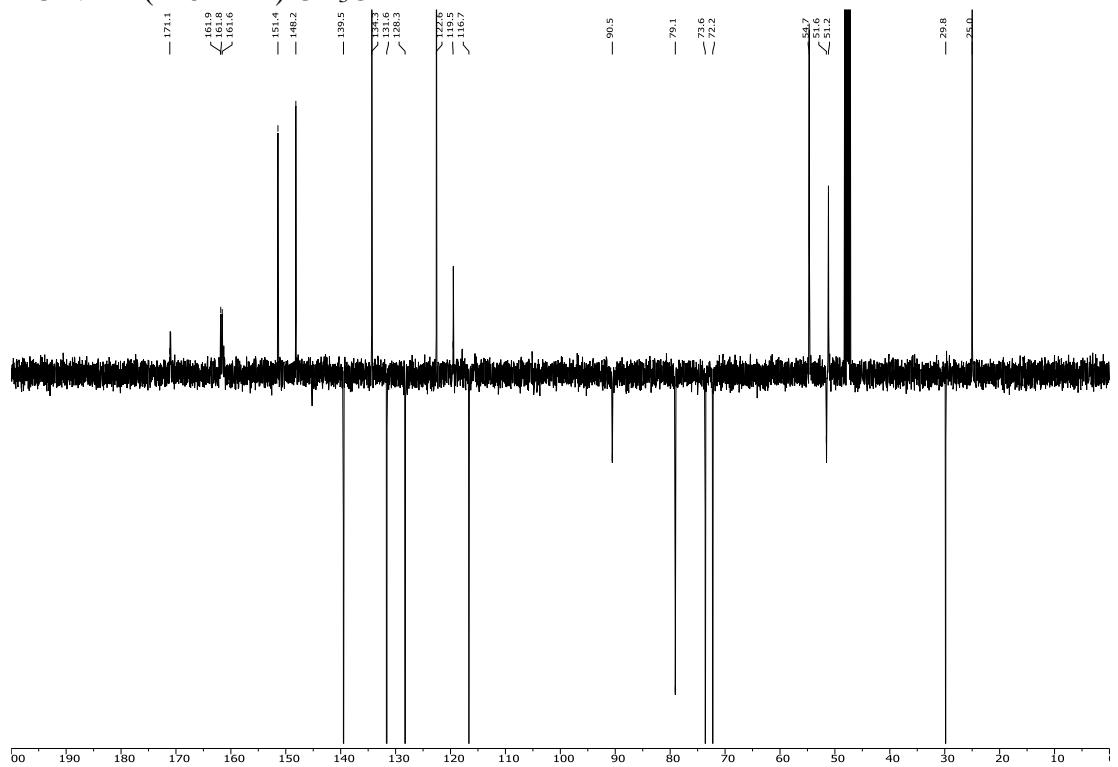

Compound **17r**  $^1\text{H}$  NMR (400 MHz)  $\text{CD}_3\text{OD}$

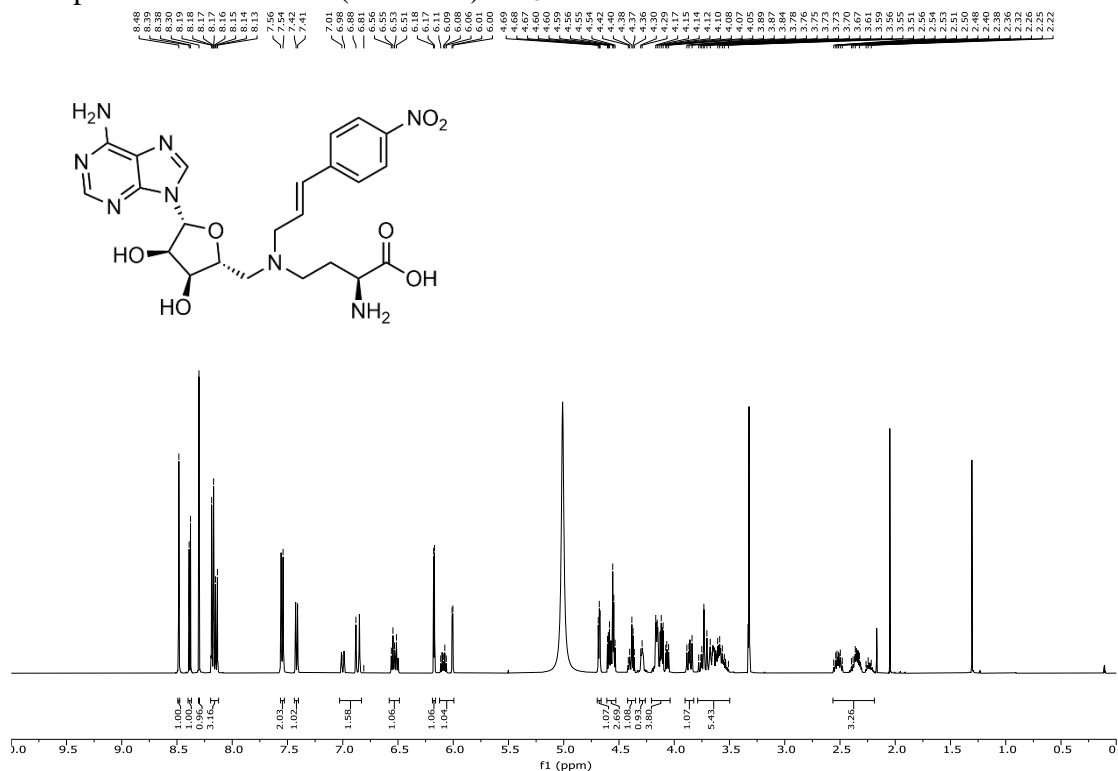

$^{13}\text{C}$  NMR (101 MHz)  $\text{CD}_3\text{OD}$

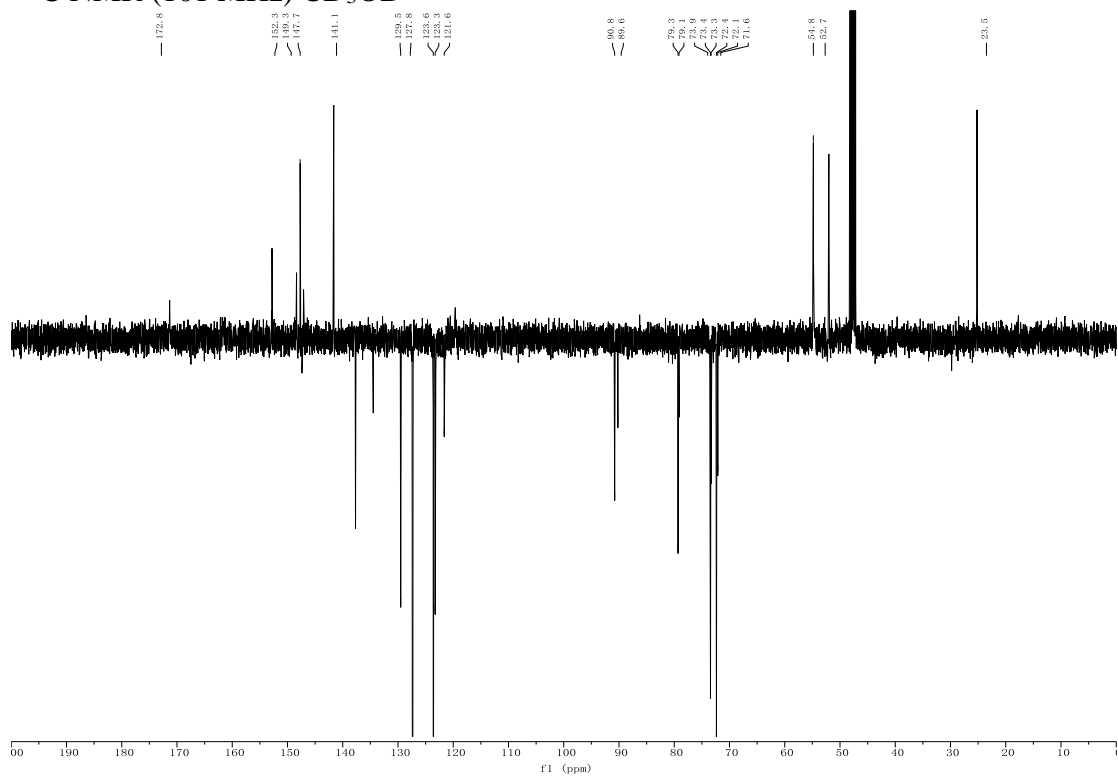

Compound **17s**  $^1\text{H}$  NMR (400 MHz)  $\text{D}_2\text{O}$

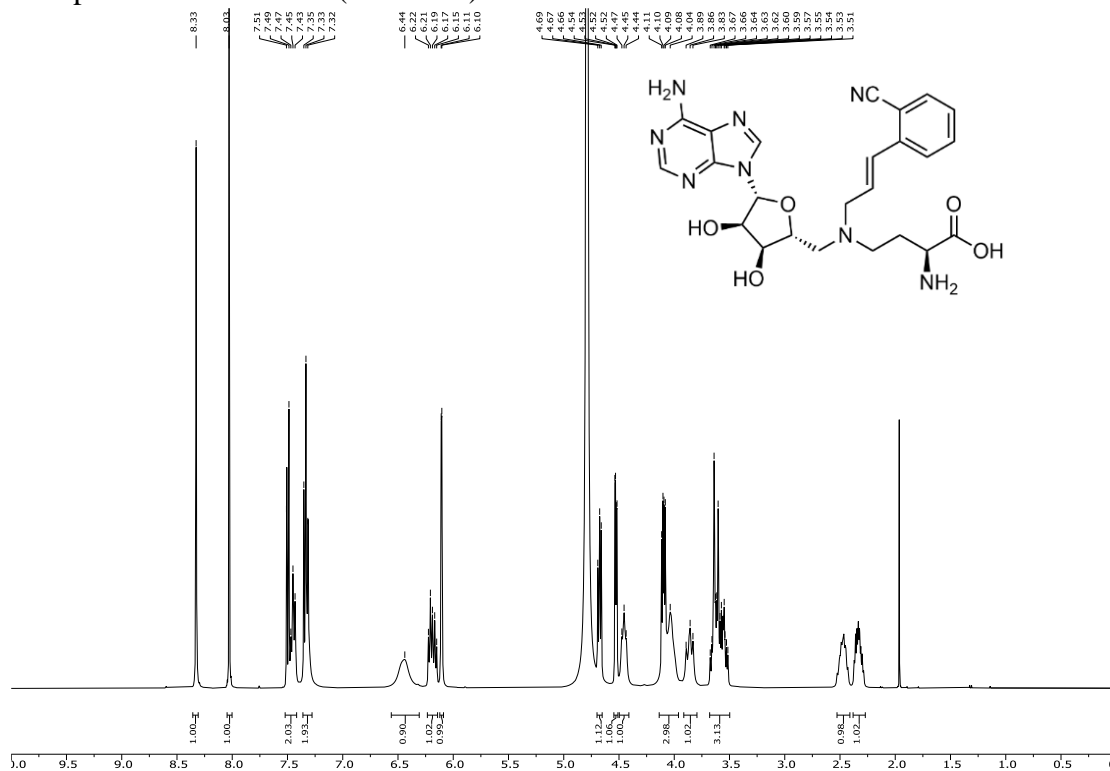

$^{13}\text{C}$  NMR (101 MHz)  $\text{D}_2\text{O}$

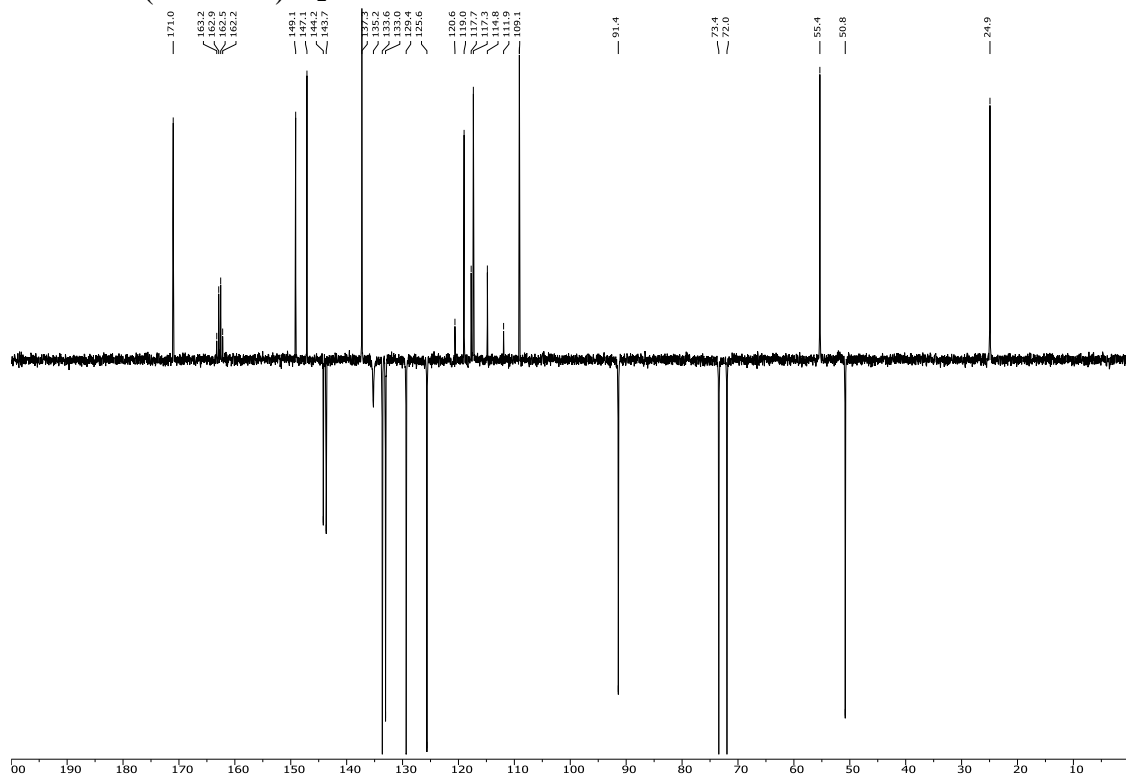

Compound **17t**  $^1\text{H}$  NMR (400 MHz)  $\text{D}_2\text{O}$

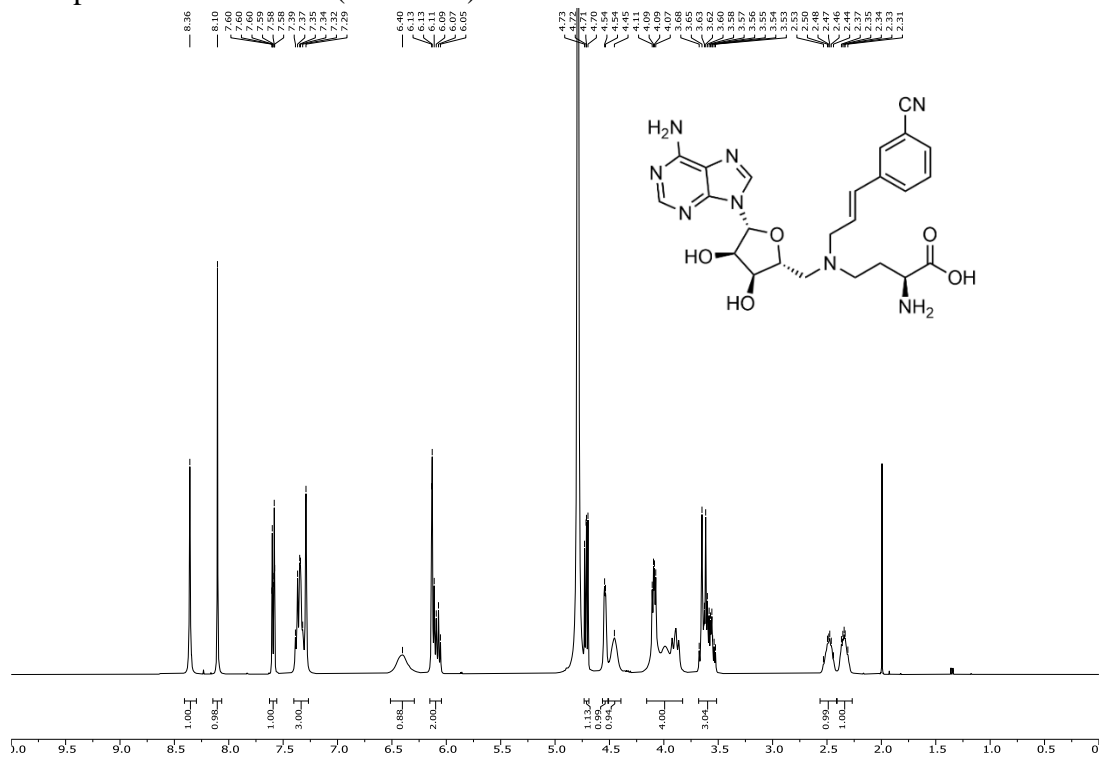

$^{13}\text{C}$  NMR (101 MHz)  $\text{D}_2\text{O}$

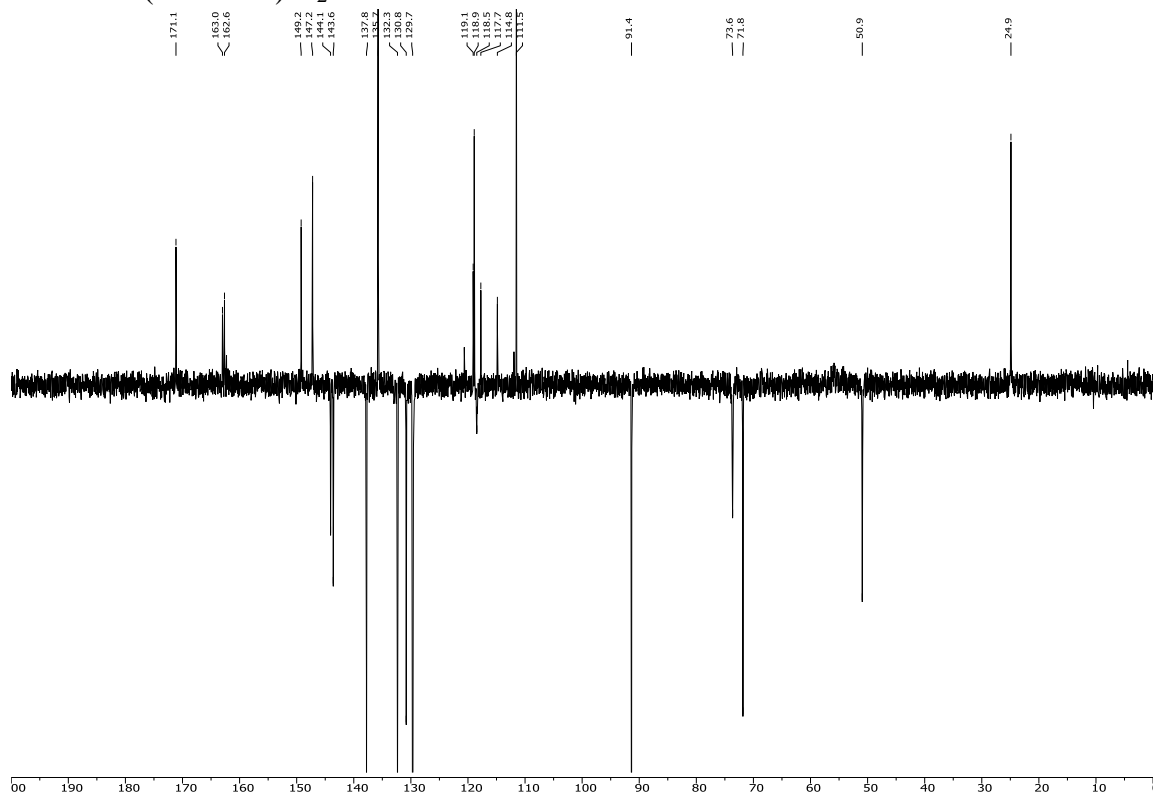



Compound **17u**  $^1\text{H}$  NMR (400 MHz)  $\text{D}_2\text{O}$

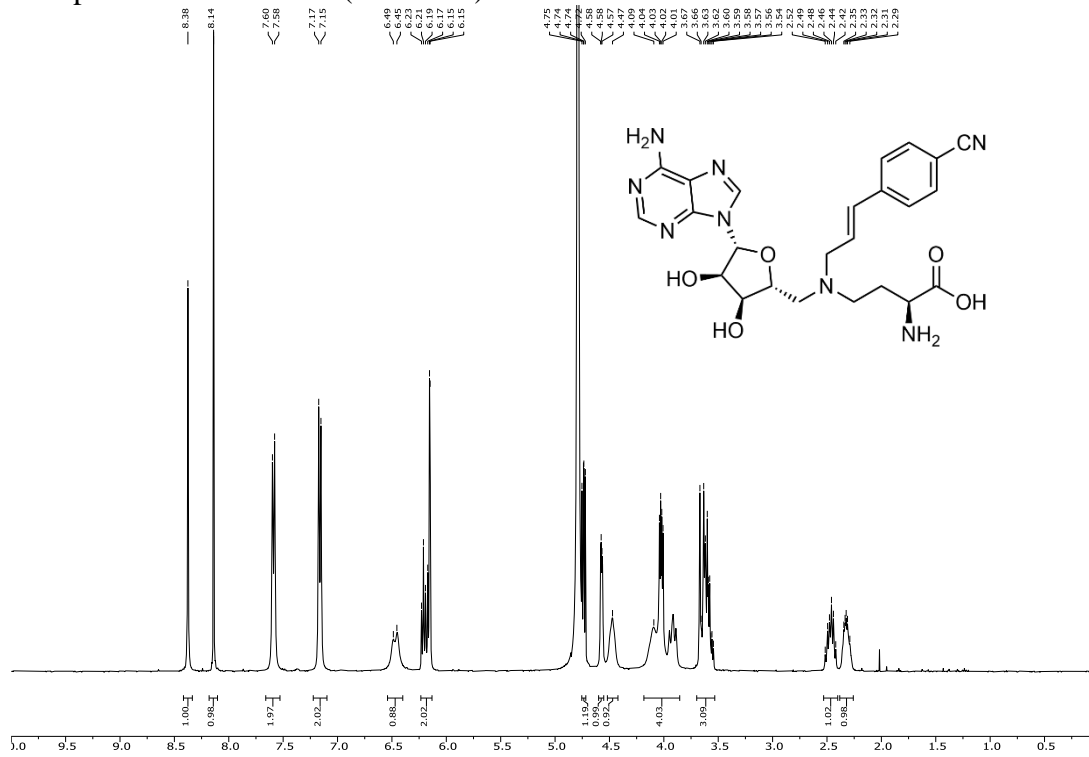

$^{13}\text{C}$  NMR (101 MHz)  $\text{D}_2\text{O}$

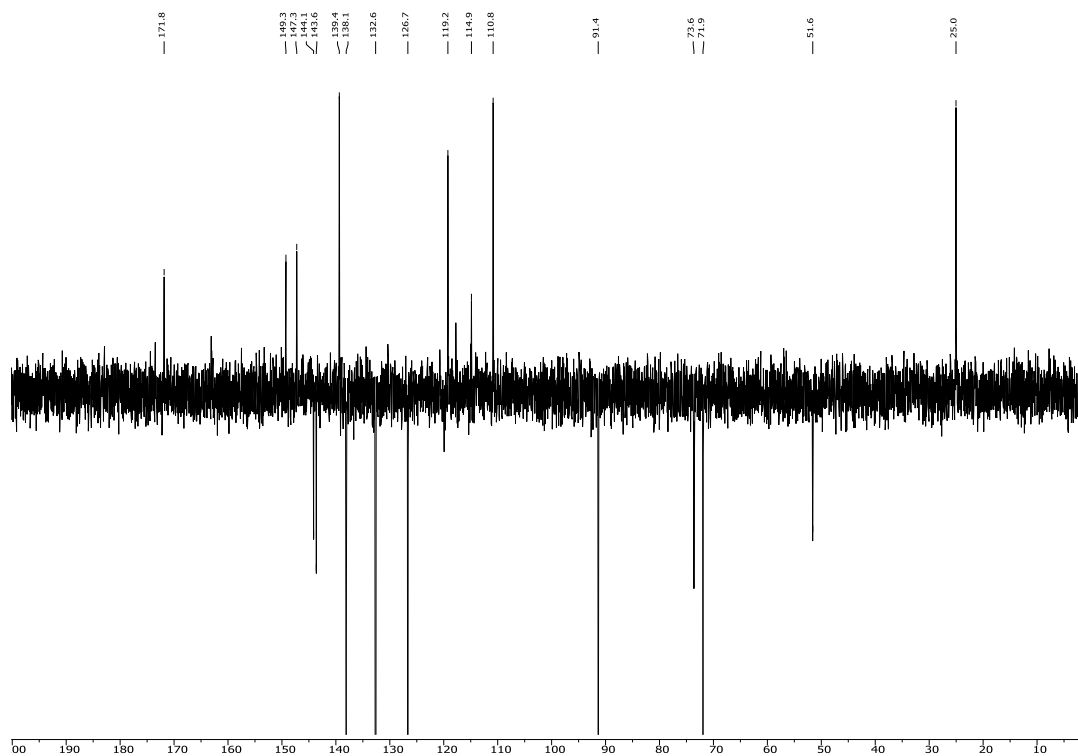

Compound **17v**  $^1\text{H}$  NMR (400 MHz)  $\text{CD}_3\text{OD}$

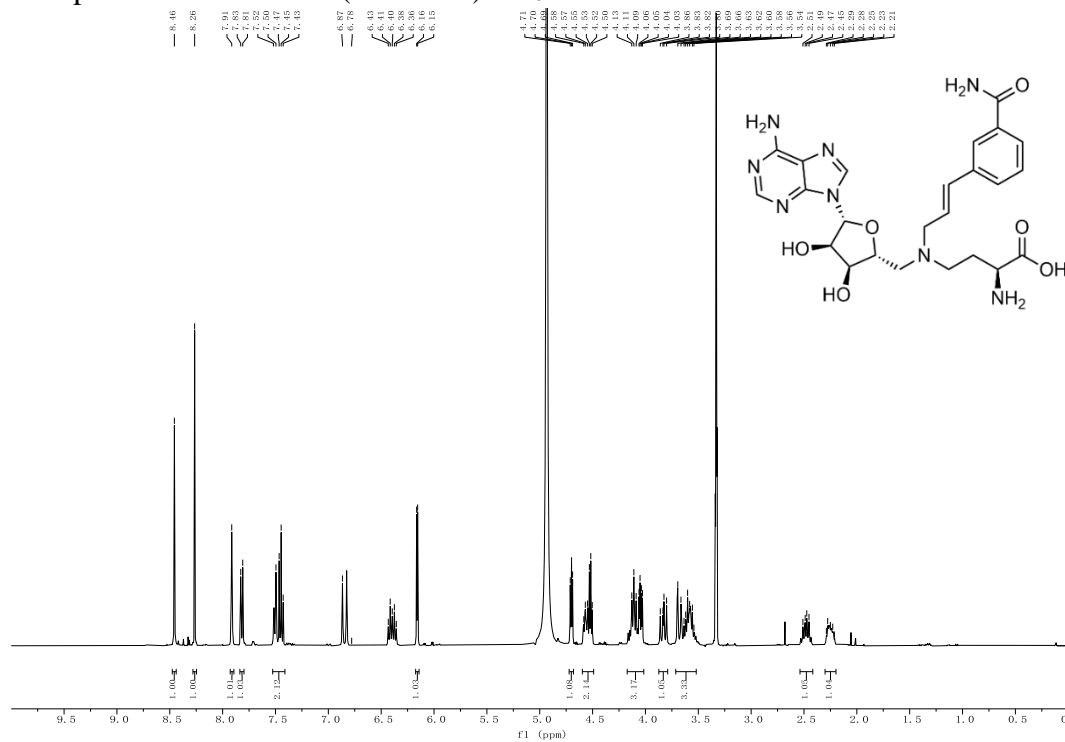

$^{13}\text{C}$  NMR (101 MHz)  $\text{CD}_3\text{OD}$

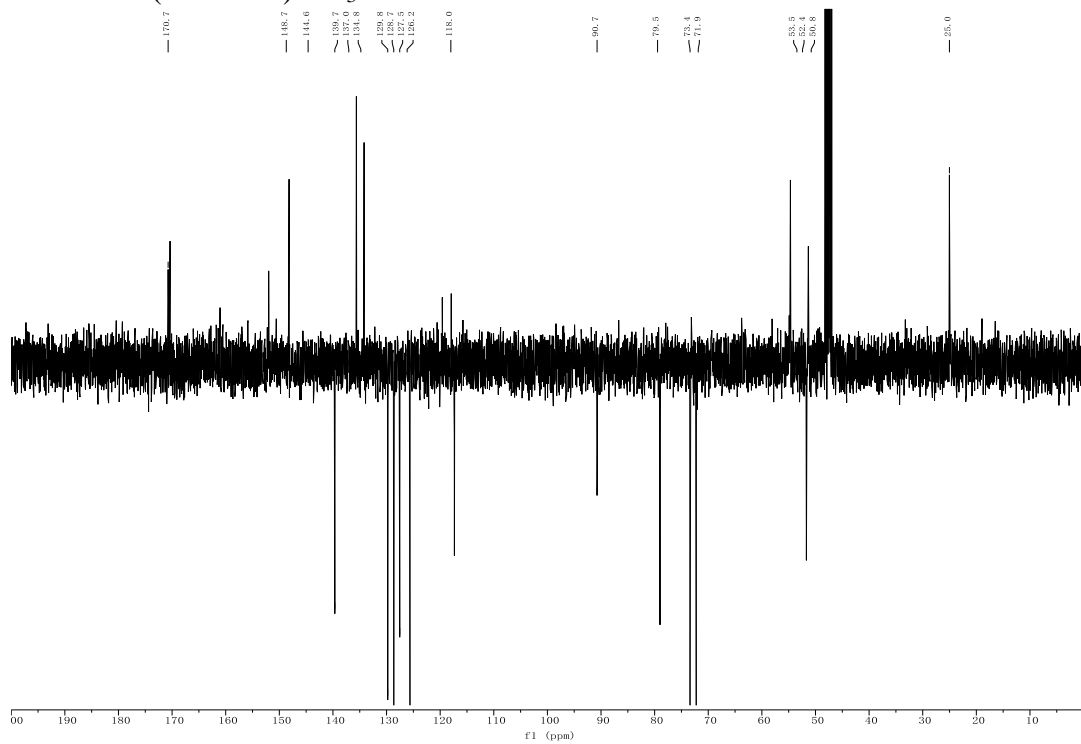

Compound **17w**  $^1\text{H}$  NMR (400 MHz)  $\text{CD}_3\text{OD}$

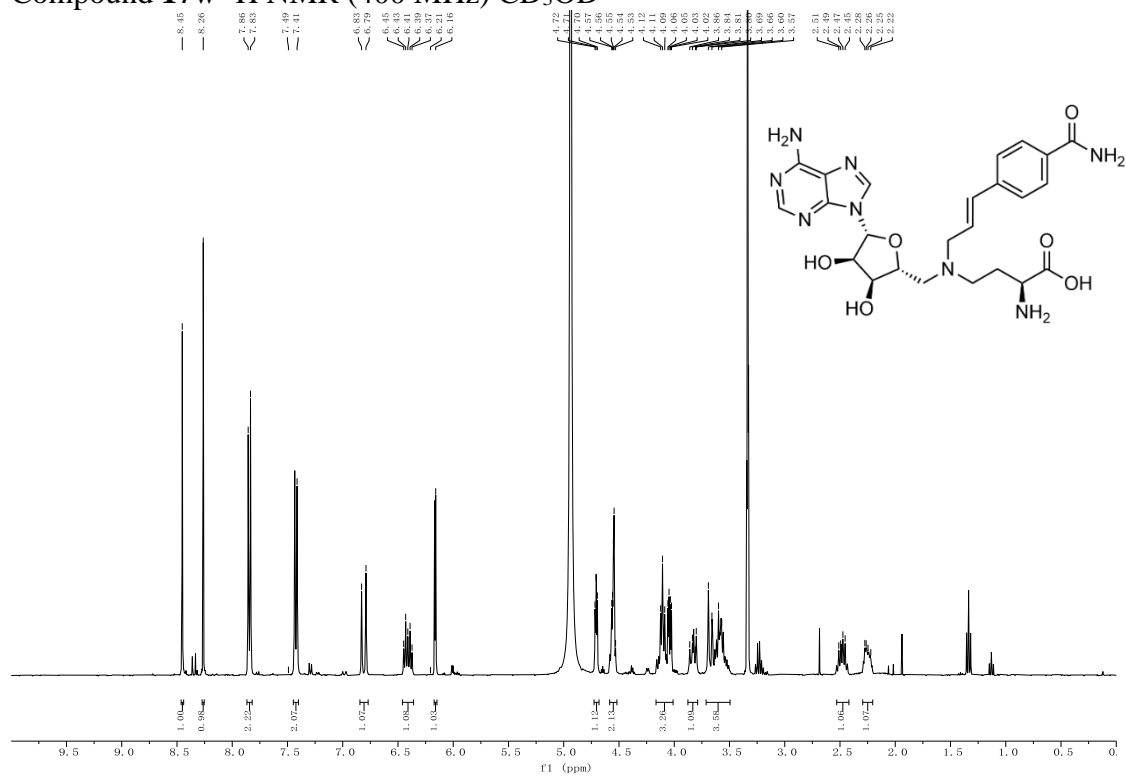

$^{13}\text{C}$  NMR (101 MHz)  $\text{CD}_3\text{OD}$

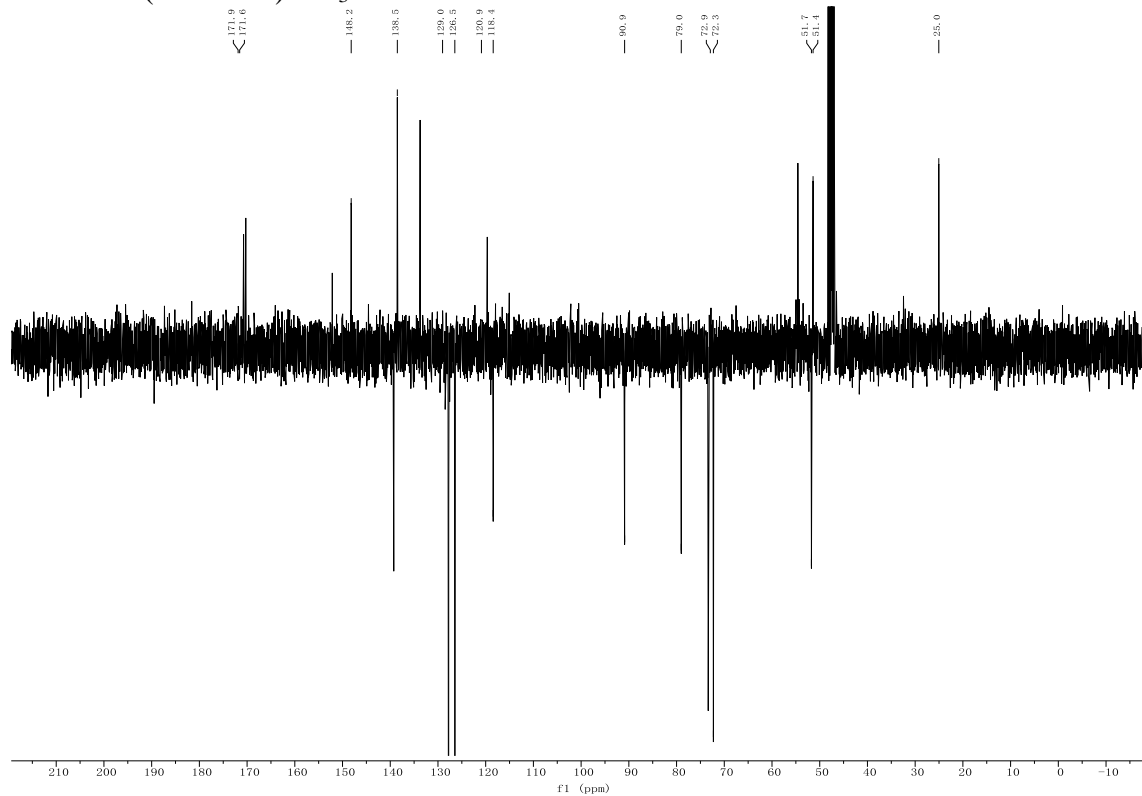



Compound **17y**  $^1\text{H}$  NMR (500 MHz)  $\text{CD}_3\text{OD}$

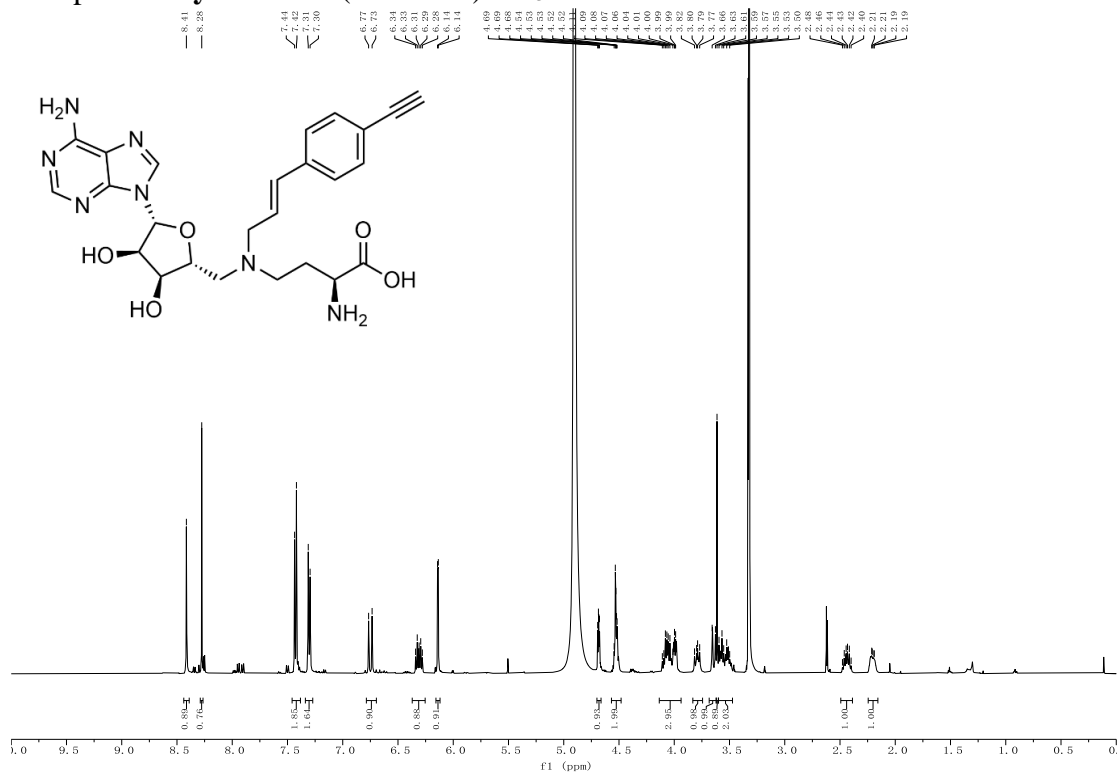

$^{13}\text{C}$  NMR (126 MHz)  $\text{CD}_3\text{OD}$

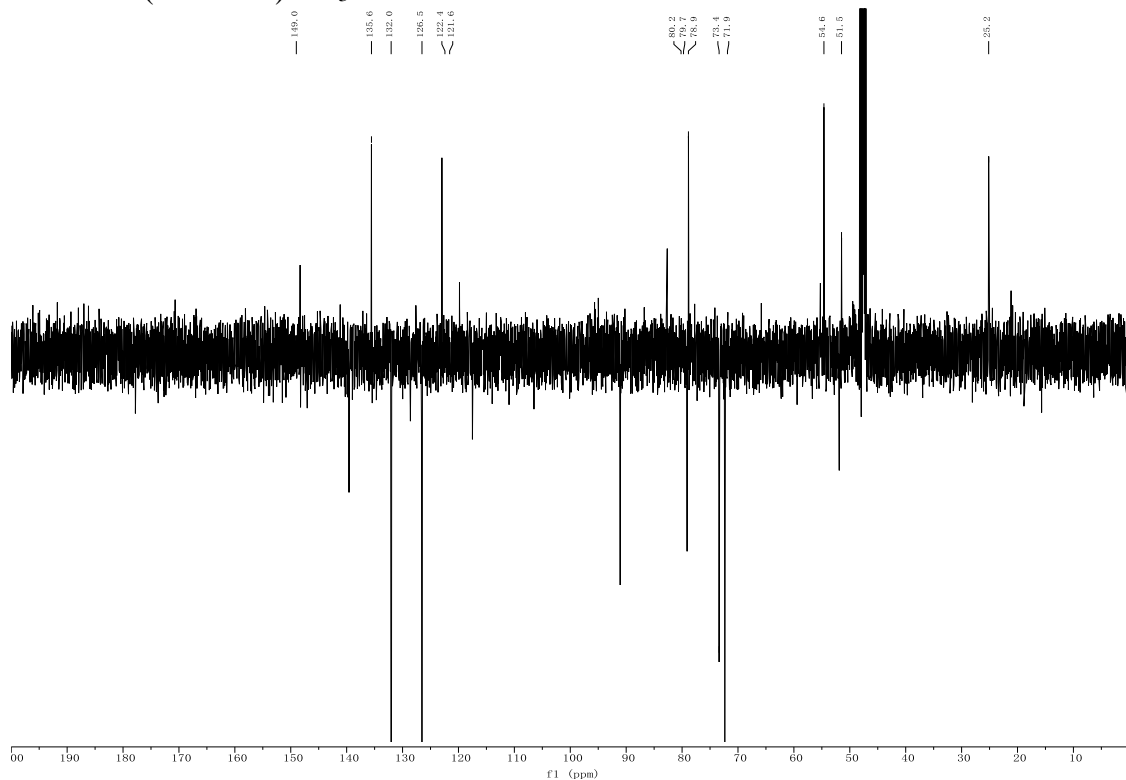

Compound **18**  $^1\text{H}$  NMR (400 MHz)  $\text{CDCl}_3$

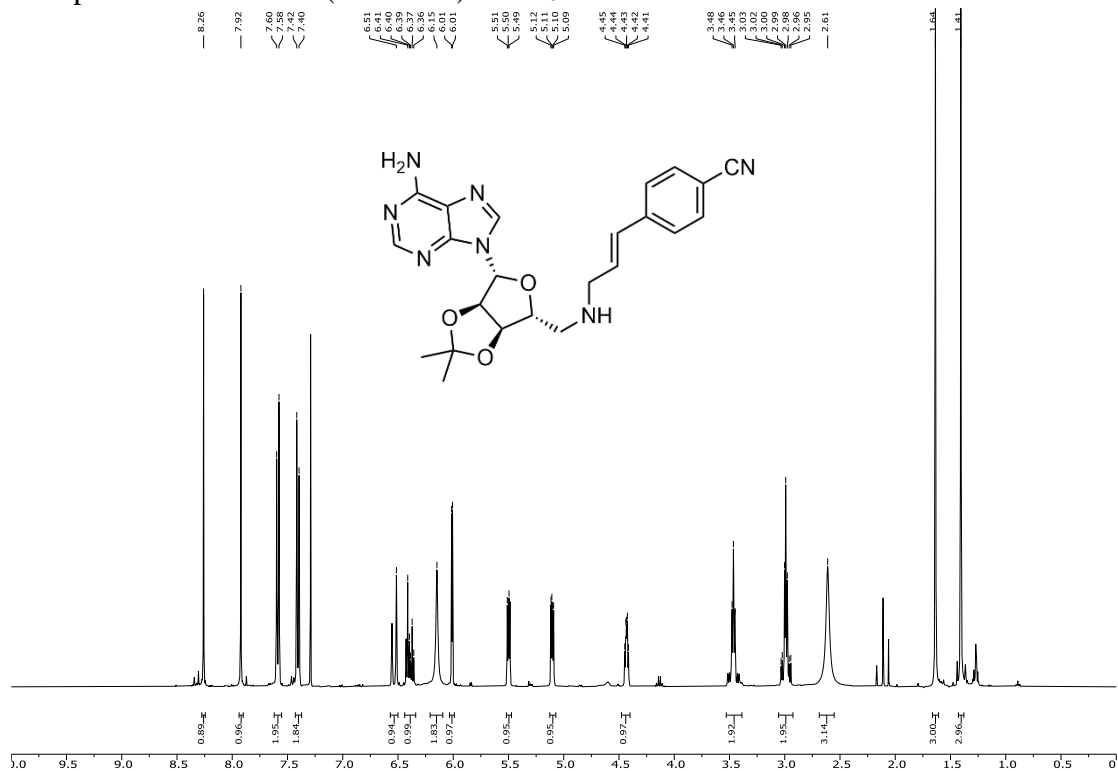

$^{13}\text{C}$  NMR (101 MHz)  $\text{CDCl}_3$

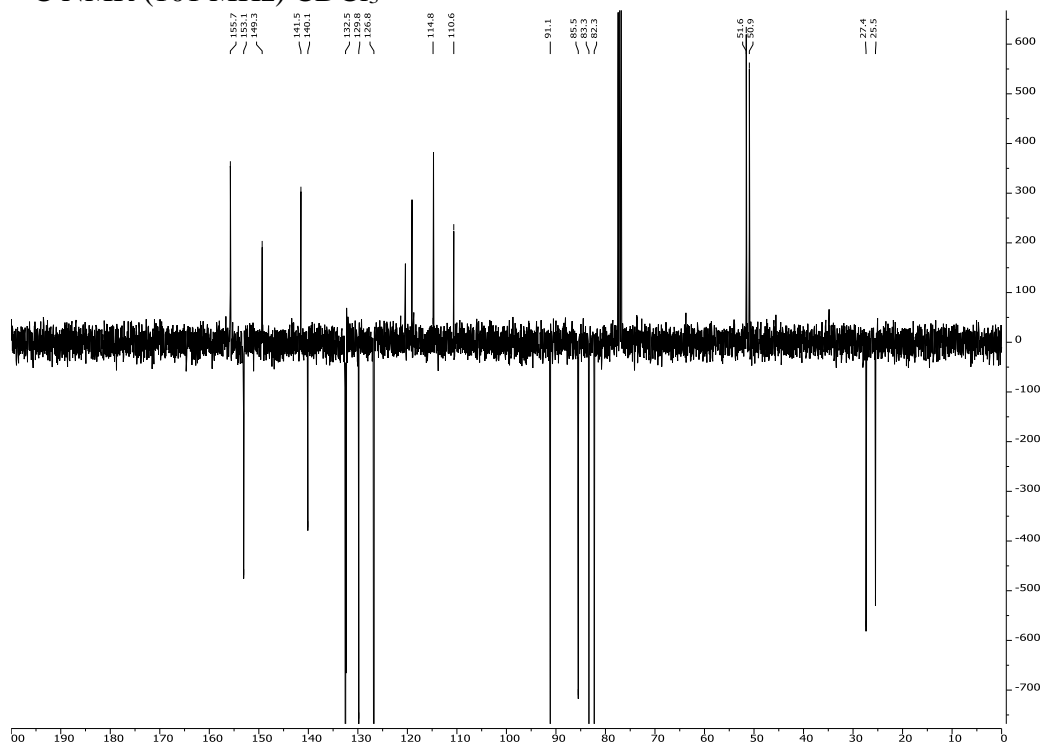

Compound **20a**  $^1\text{H}$  NMR (400 MHz)  $\text{CDCl}_3$

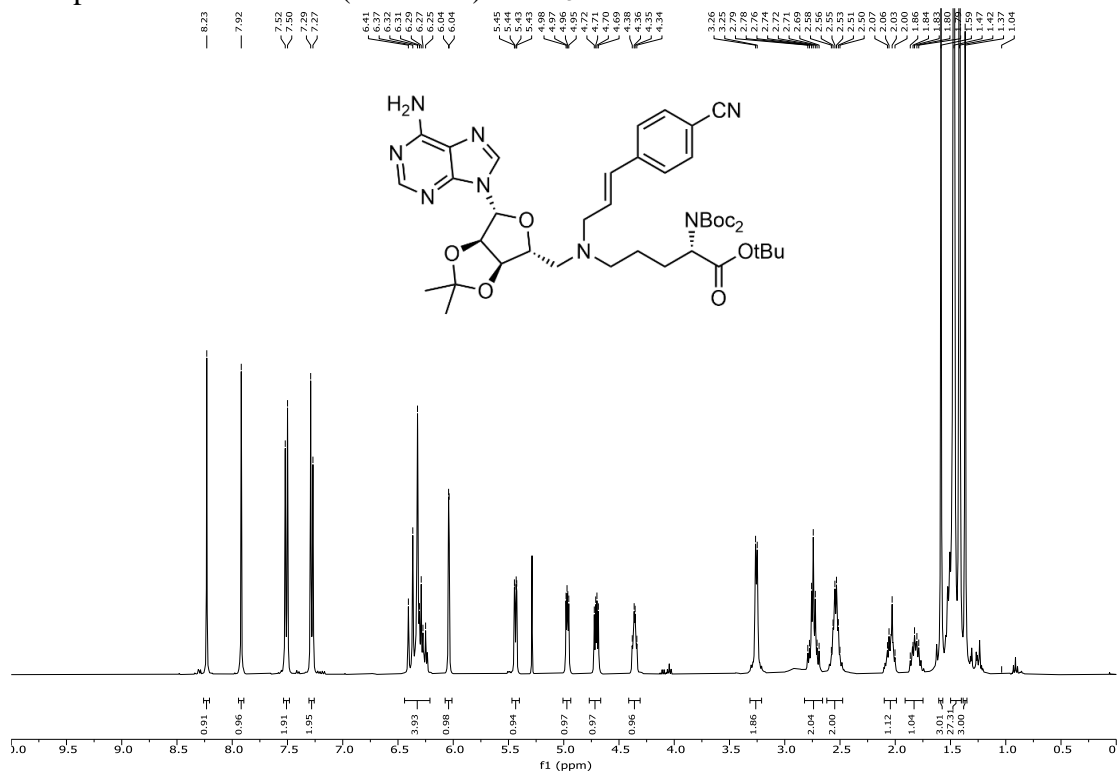

$^{13}\text{C}$  NMR (101 MHz)  $\text{CDCl}_3$

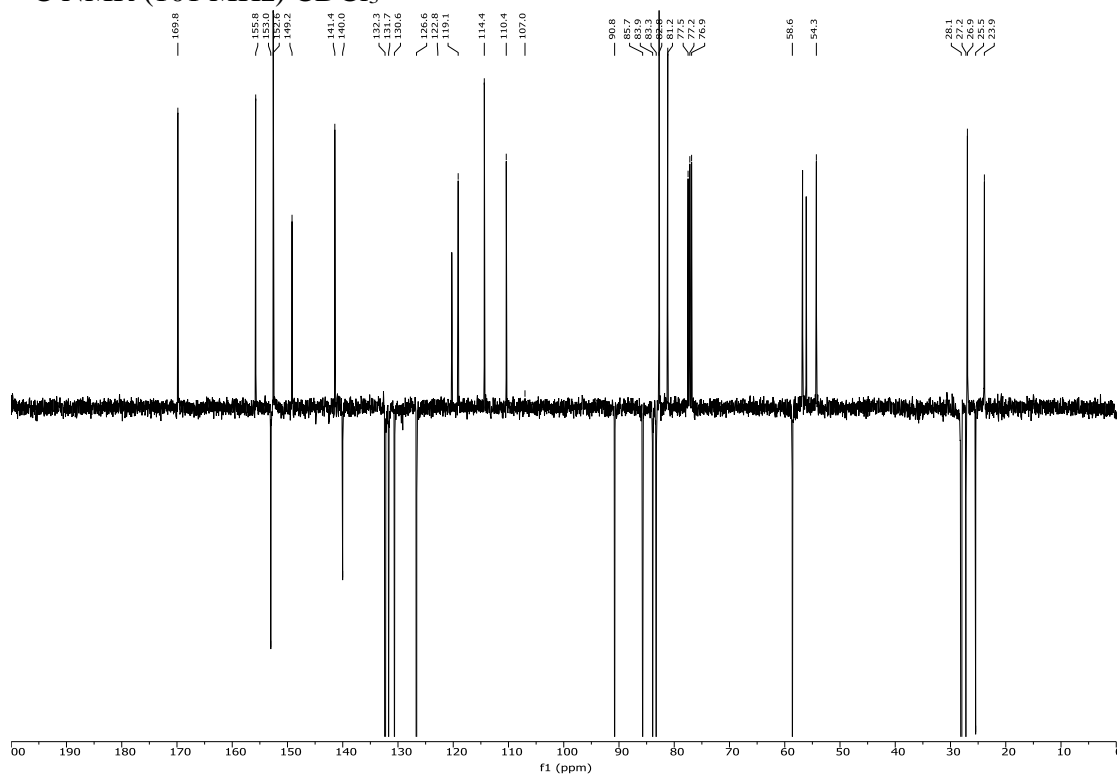

Compound **20b**  $^1\text{H}$  NMR (400 MHz)  $\text{CDCl}_3$

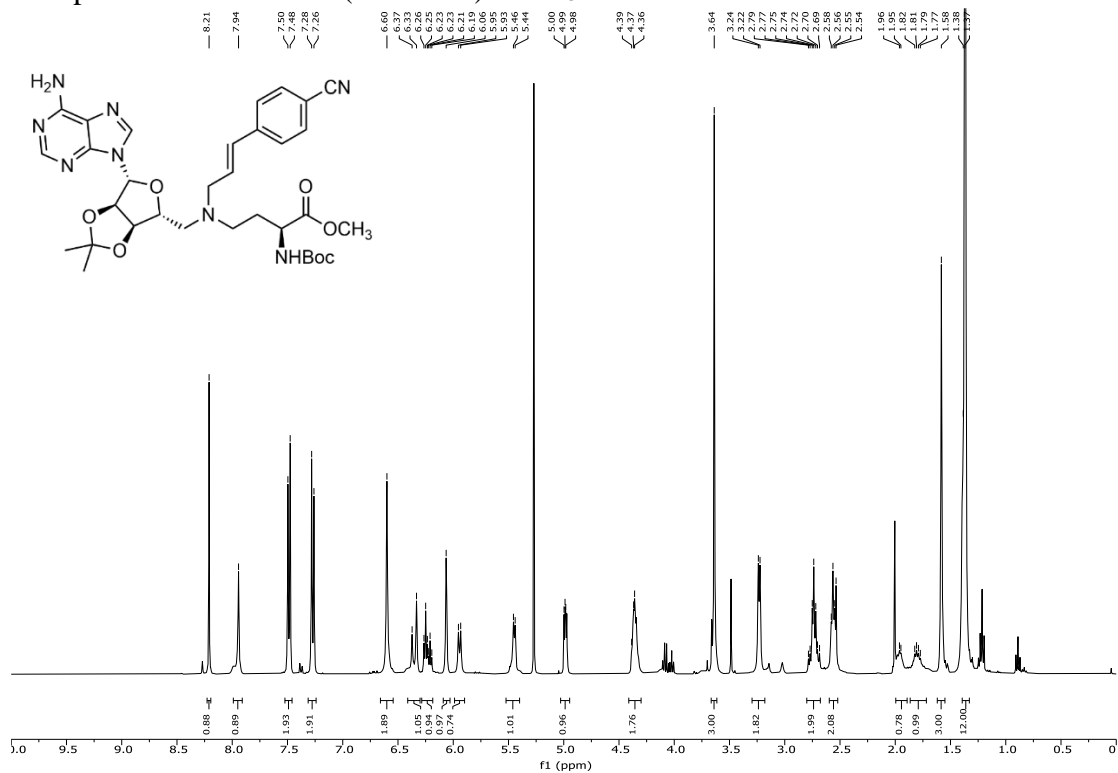

$^{13}\text{C}$  NMR (101 MHz)  $\text{CDCl}_3$

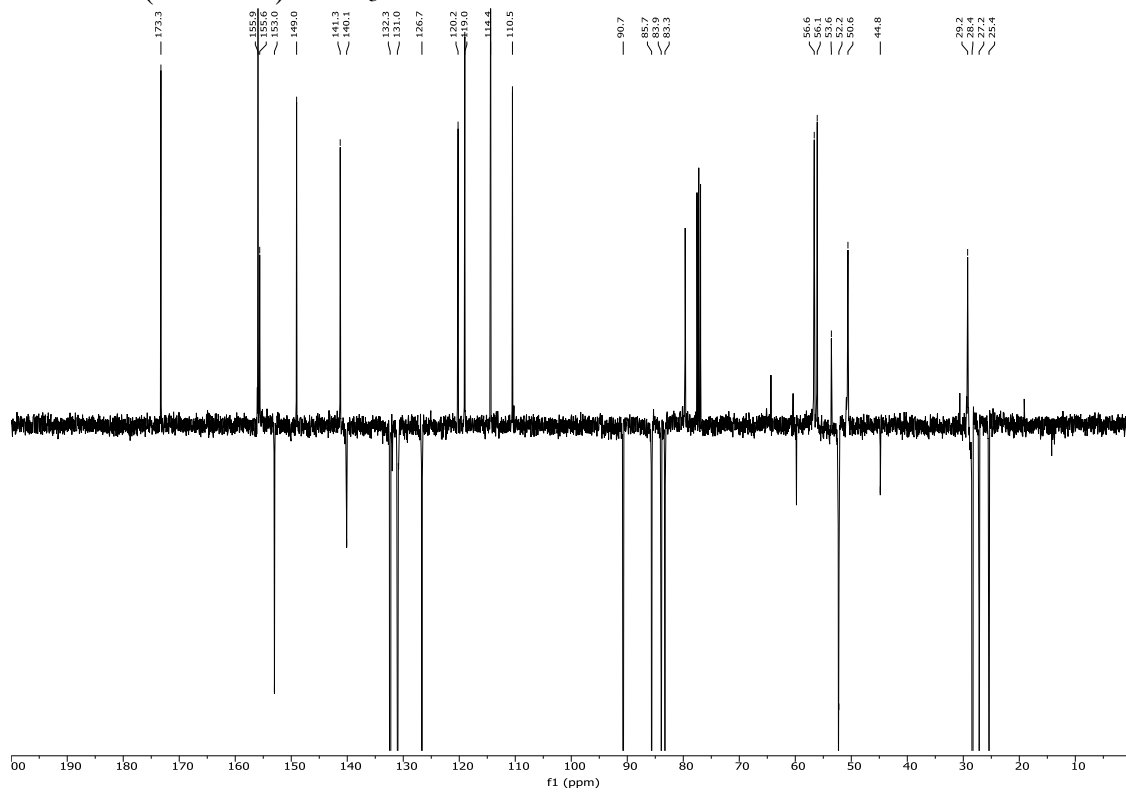





Compound **20d**  $^1\text{H}$  NMR (500 MHz)  $\text{CDCl}_3$

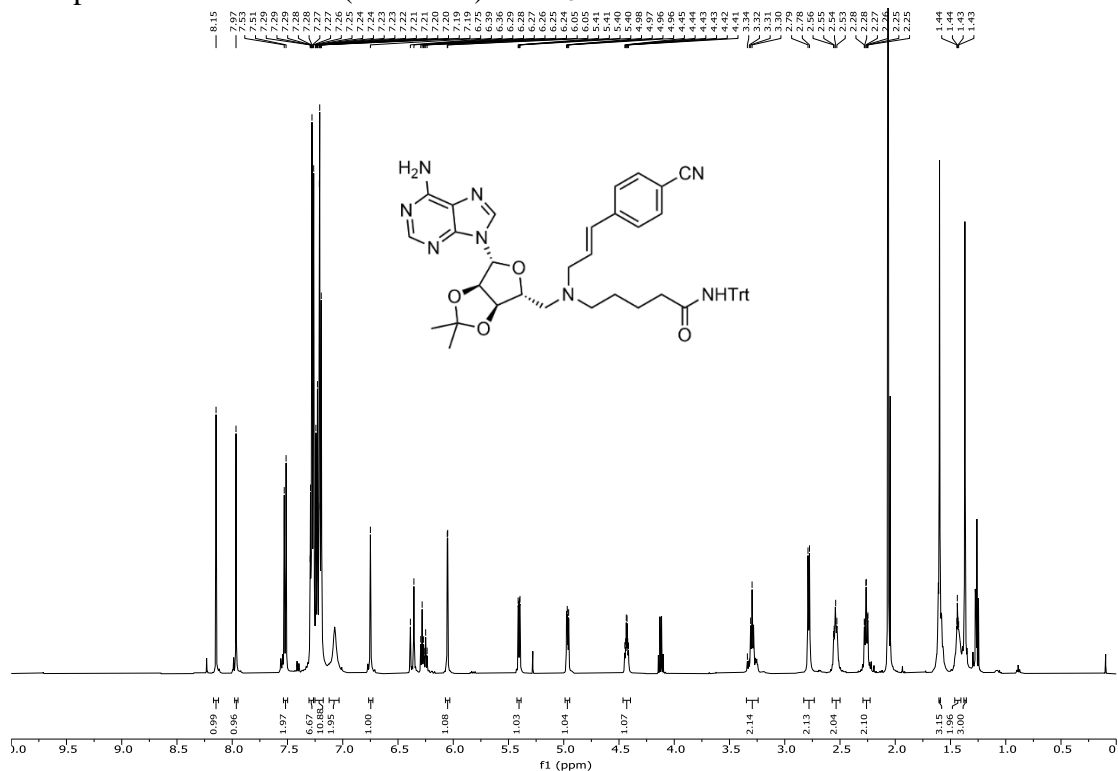

$^{13}\text{C}$  NMR (126 MHz)  $\text{CDCl}_3$

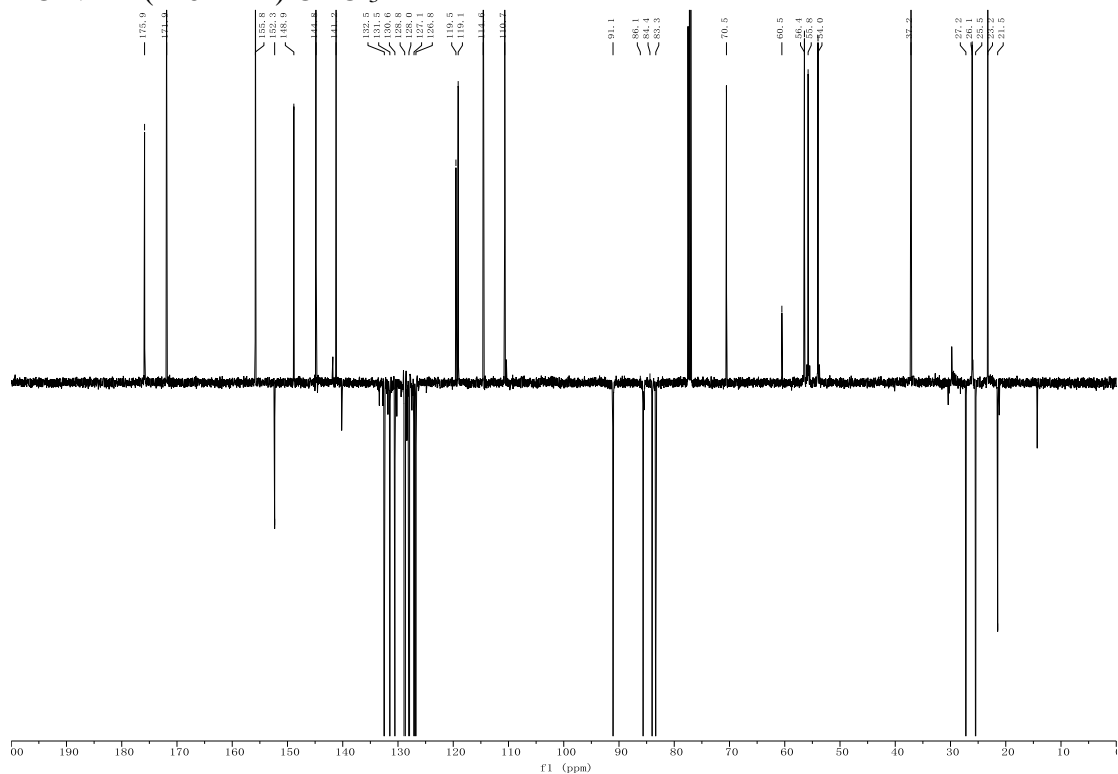

Compound **20e**  $^1\text{H}$  NMR (500 MHz)  $\text{CDCl}_3$

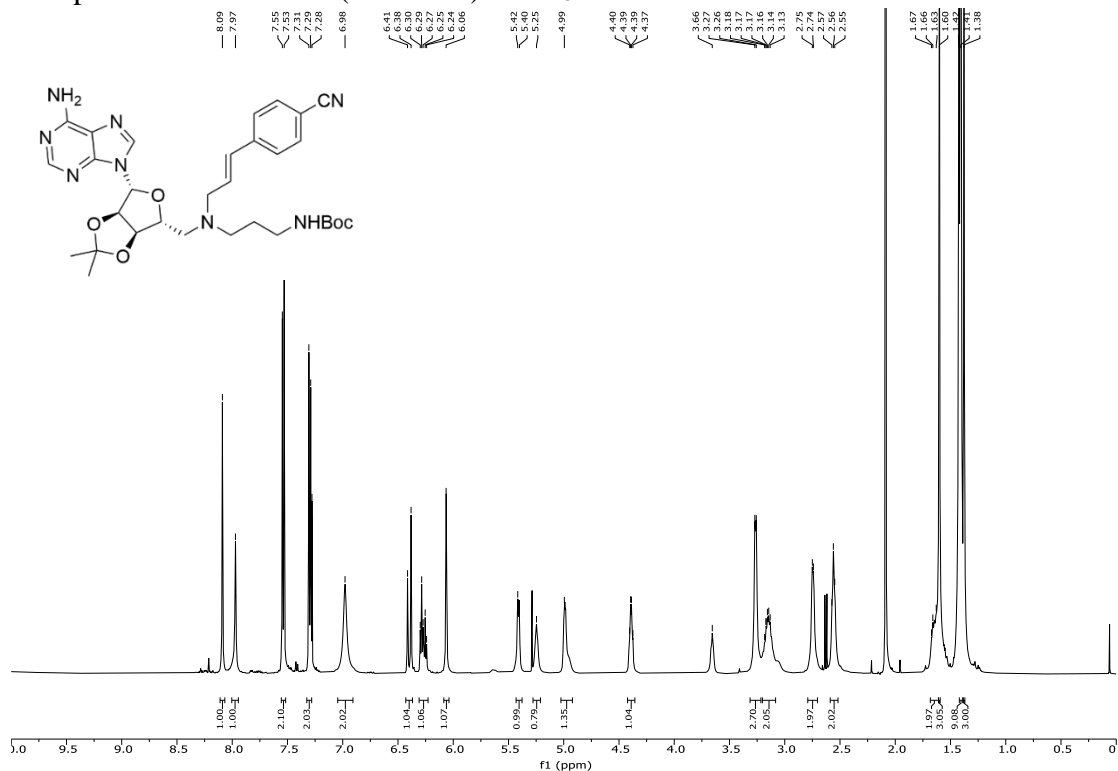

$^{13}\text{C}$  NMR (126 MHz)  $\text{CDCl}_3$

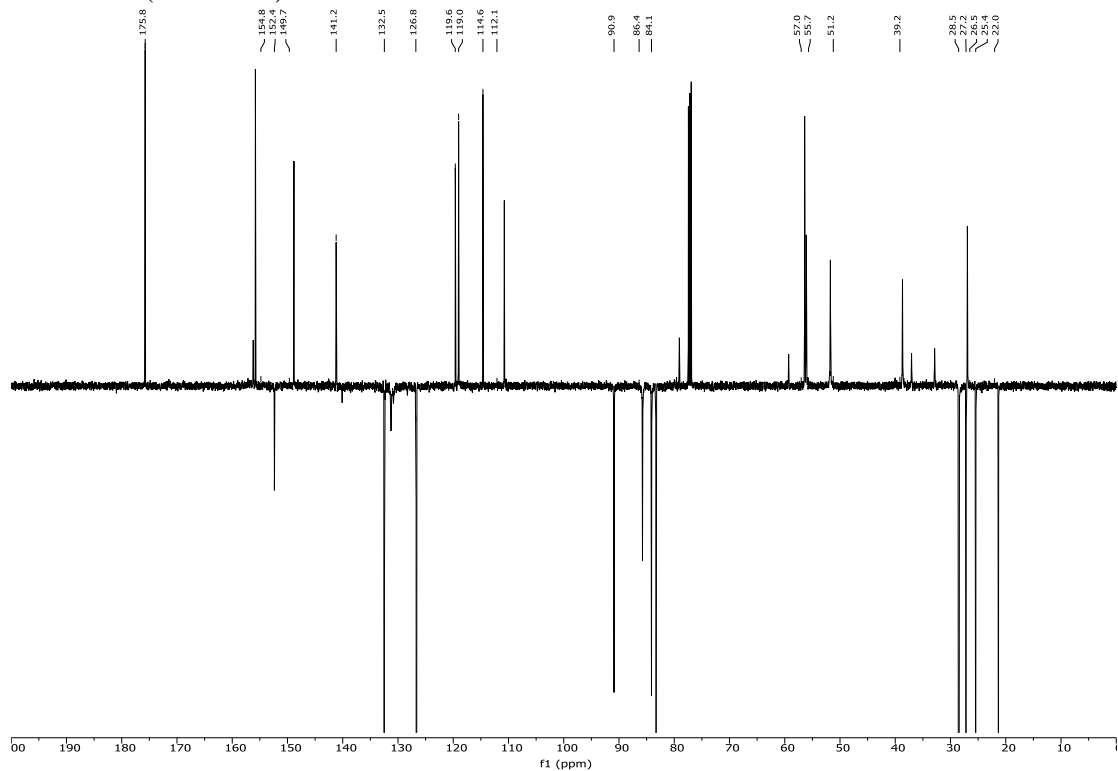

Compound **20f**  $^1\text{H}$  NMR (400 MHz)  $\text{CDCl}_3$

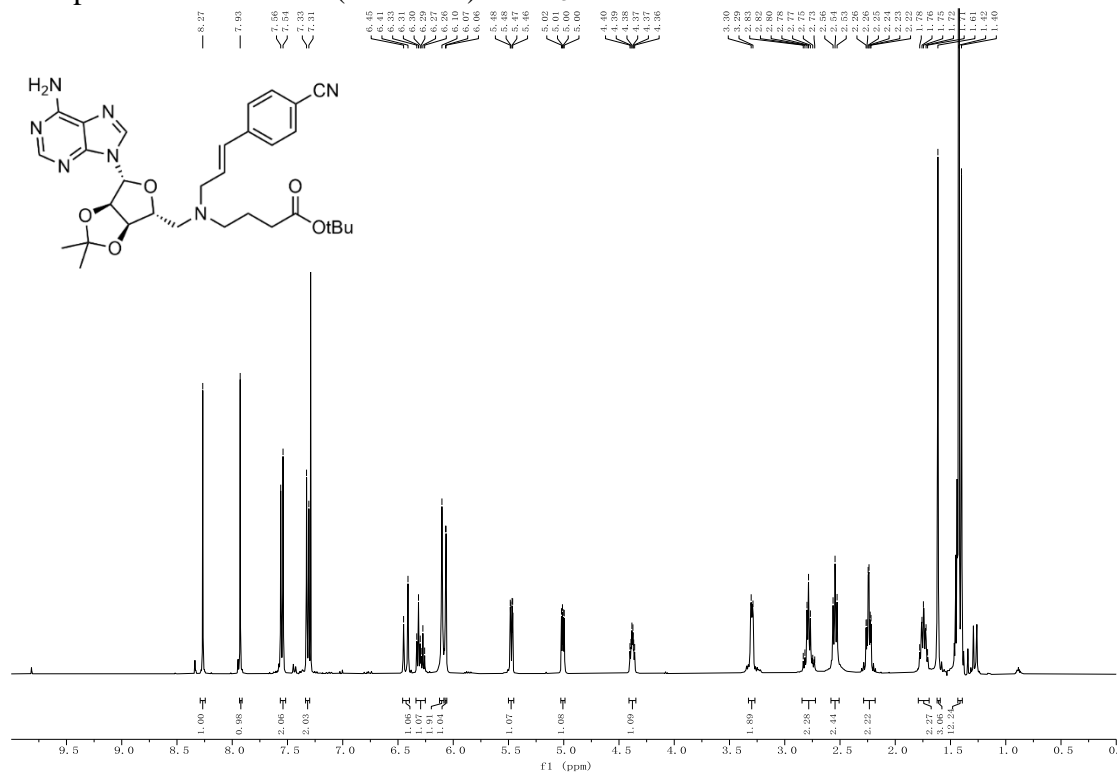

$^{13}\text{C}$  NMR (101 MHz)  $\text{CDCl}_3$

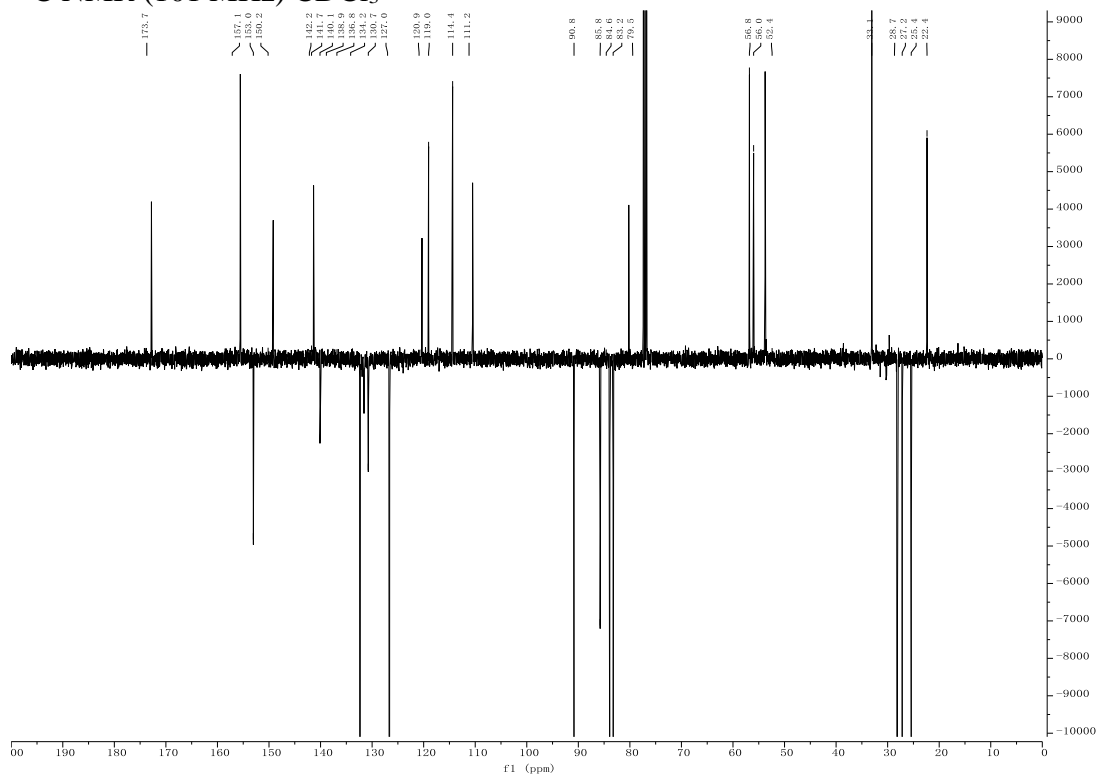

Compound 20g <sup>1</sup>H NMR (500 MHz) CDCl<sub>3</sub>

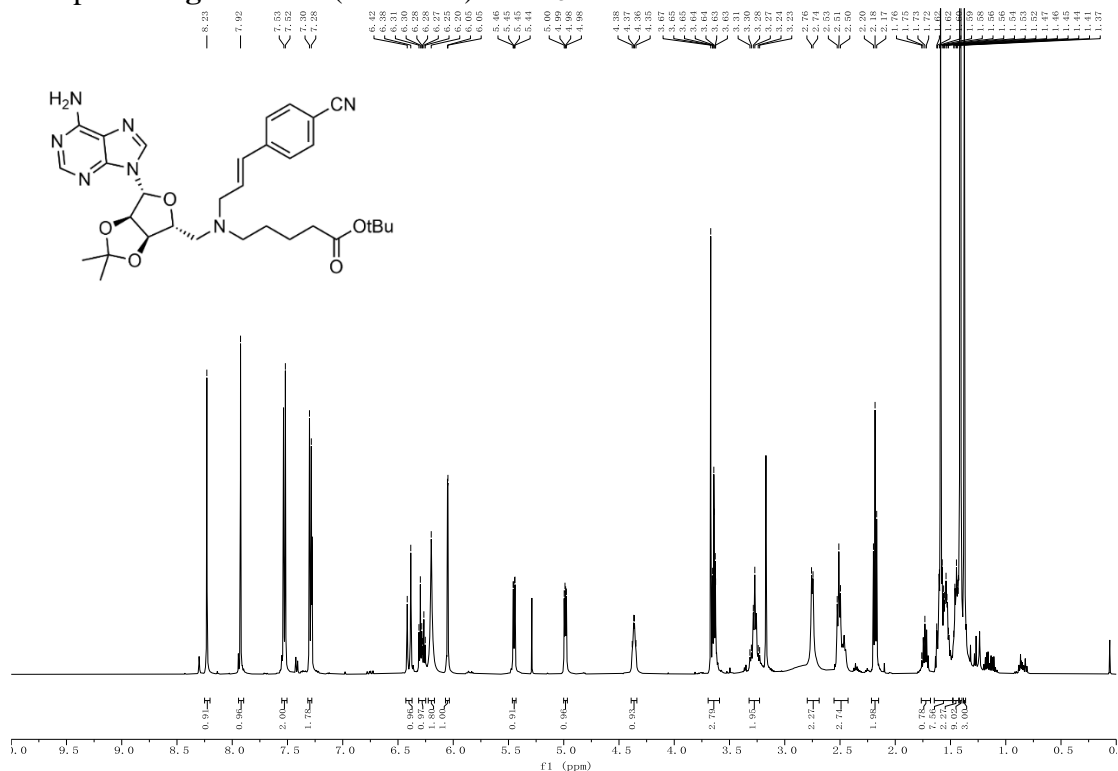

<sup>13</sup>C NMR (126 MHz) CDCl<sub>3</sub>

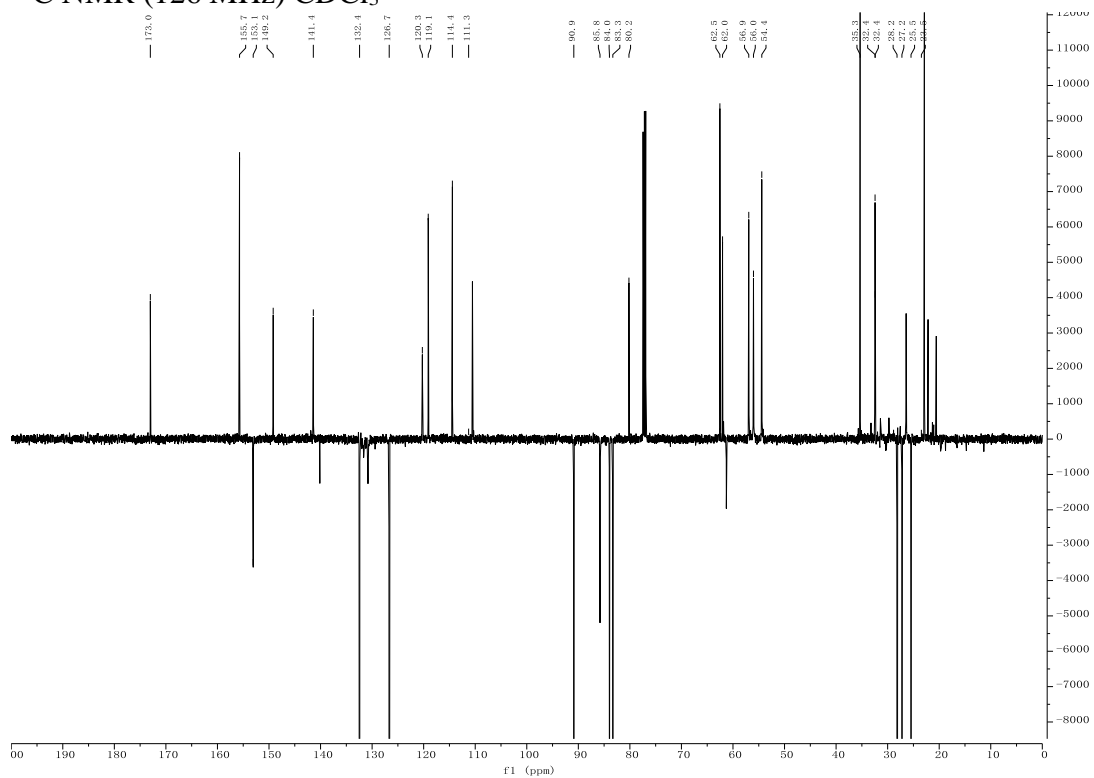

Compound **20h**  $^1\text{H}$  NMR (400 MHz)  $\text{CDCl}_3$

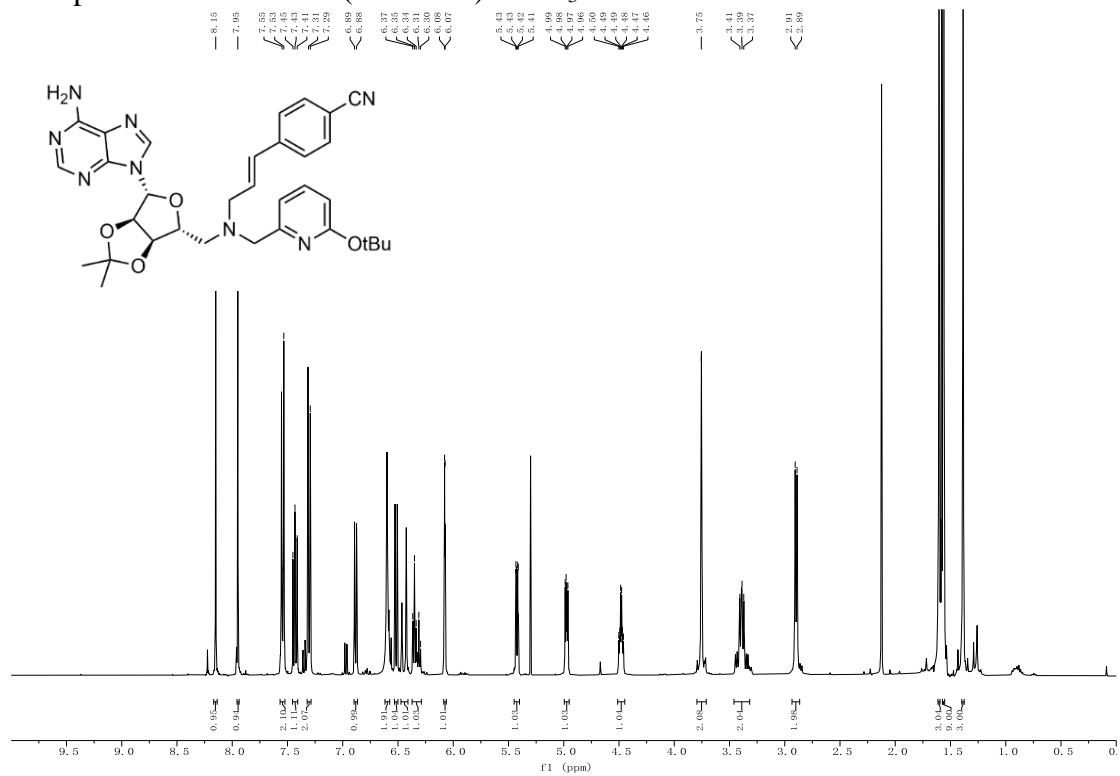

$^{13}\text{C}$  NMR (101 MHz)  $\text{CDCl}_3$

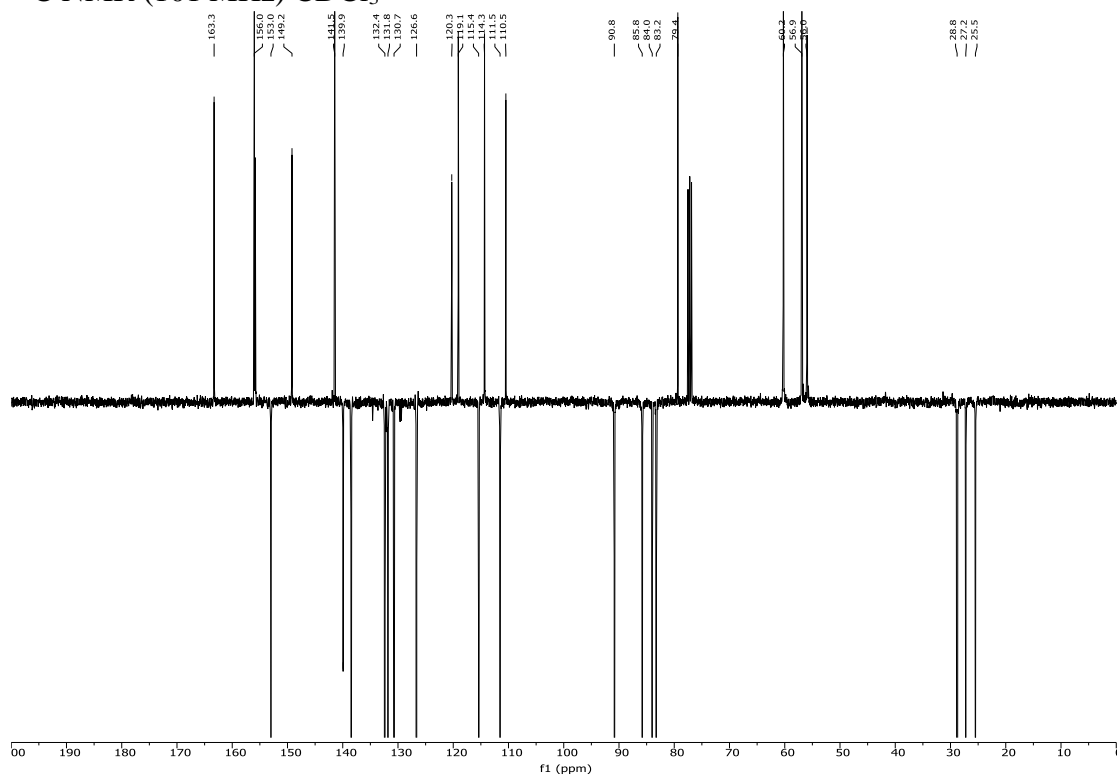

Compound 20j  $^1\text{H}$  NMR (400 MHz)  $\text{CDCl}_3$

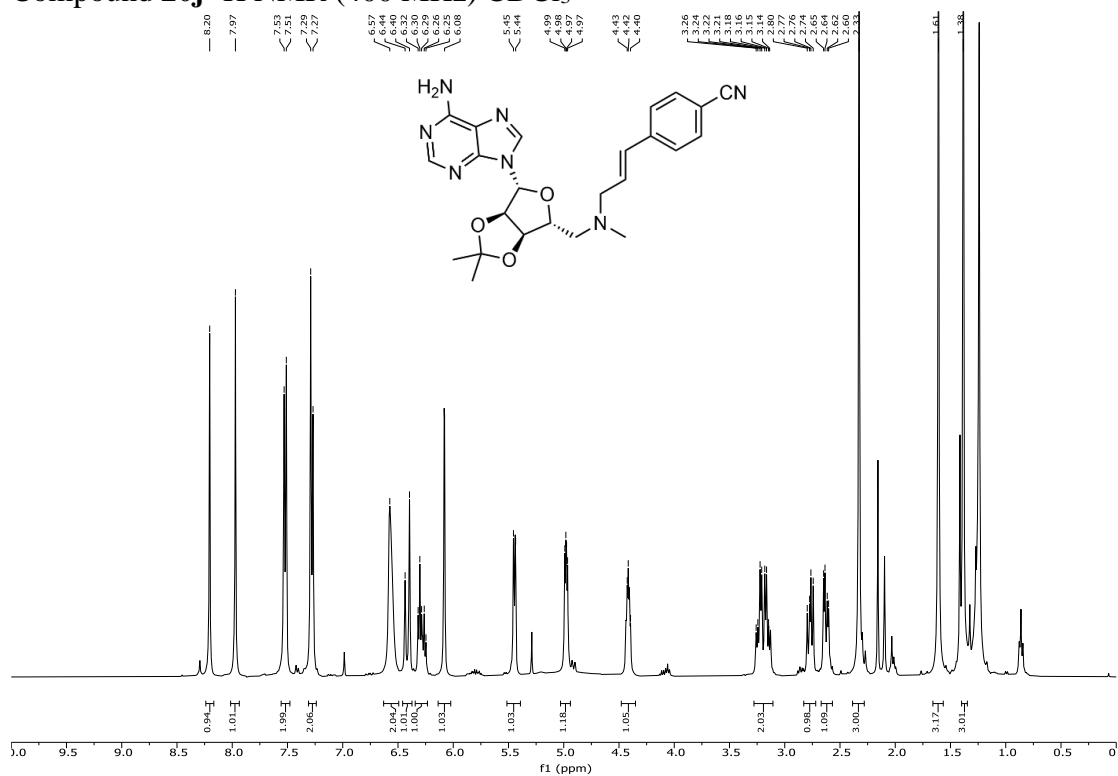

$^{13}\text{C}$  NMR (101 MHz)  $\text{CDCl}_3$

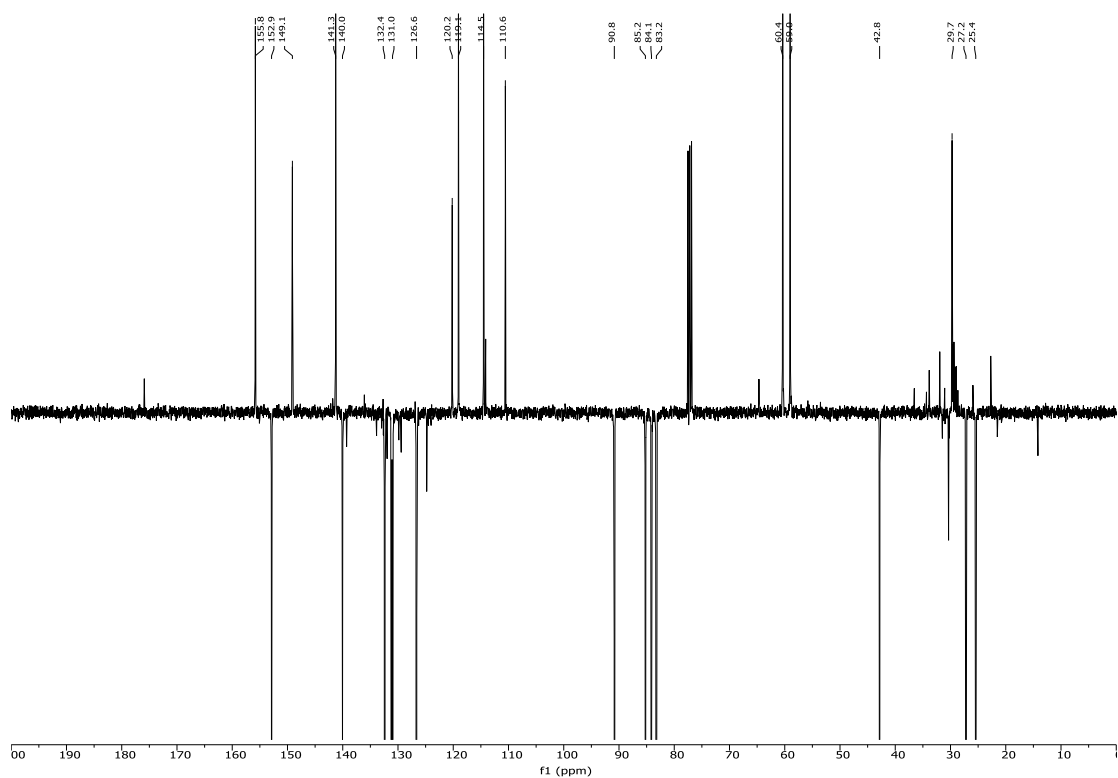

Compound **20k**  $^1\text{H}$  NMR (400 MHz)  $\text{CDCl}_3$

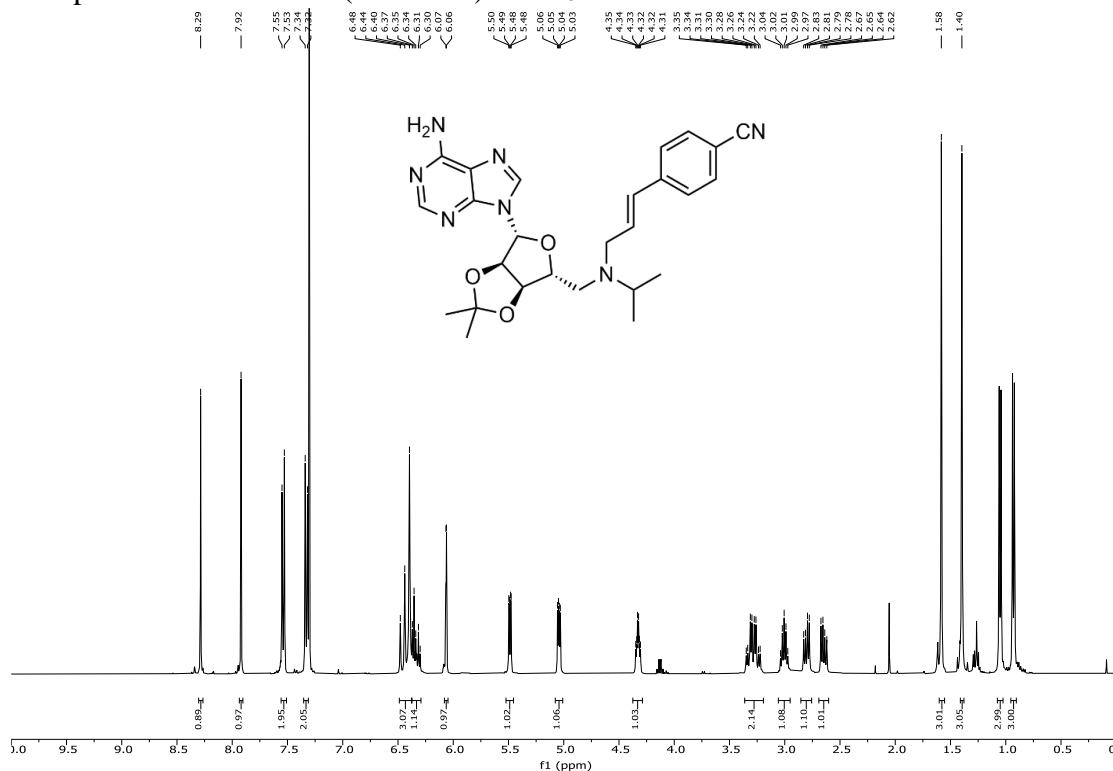

$^{13}\text{C}$  NMR (101 MHz)  $\text{CDCl}_3$

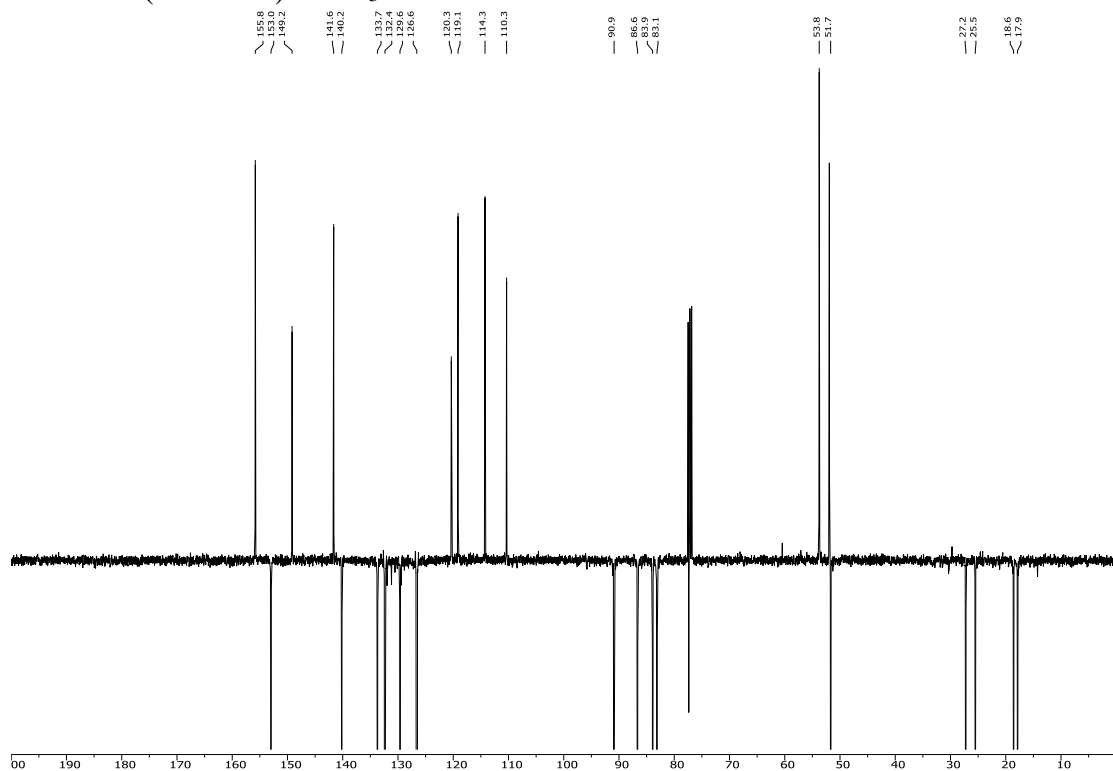



Compound **21a**  $^1\text{H}$  NMR (400 MHz)  $\text{CD}_3\text{OD}$

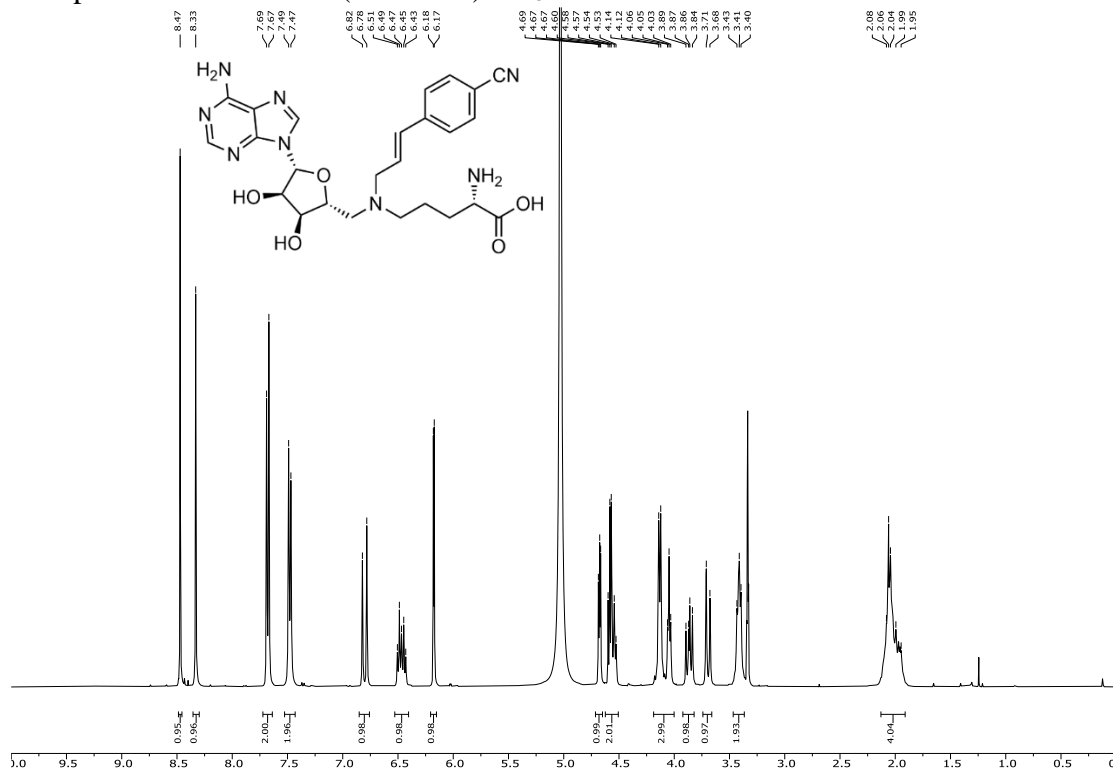

$^{13}\text{C}$  NMR (101 MHz)  $\text{CD}_3\text{OD}$

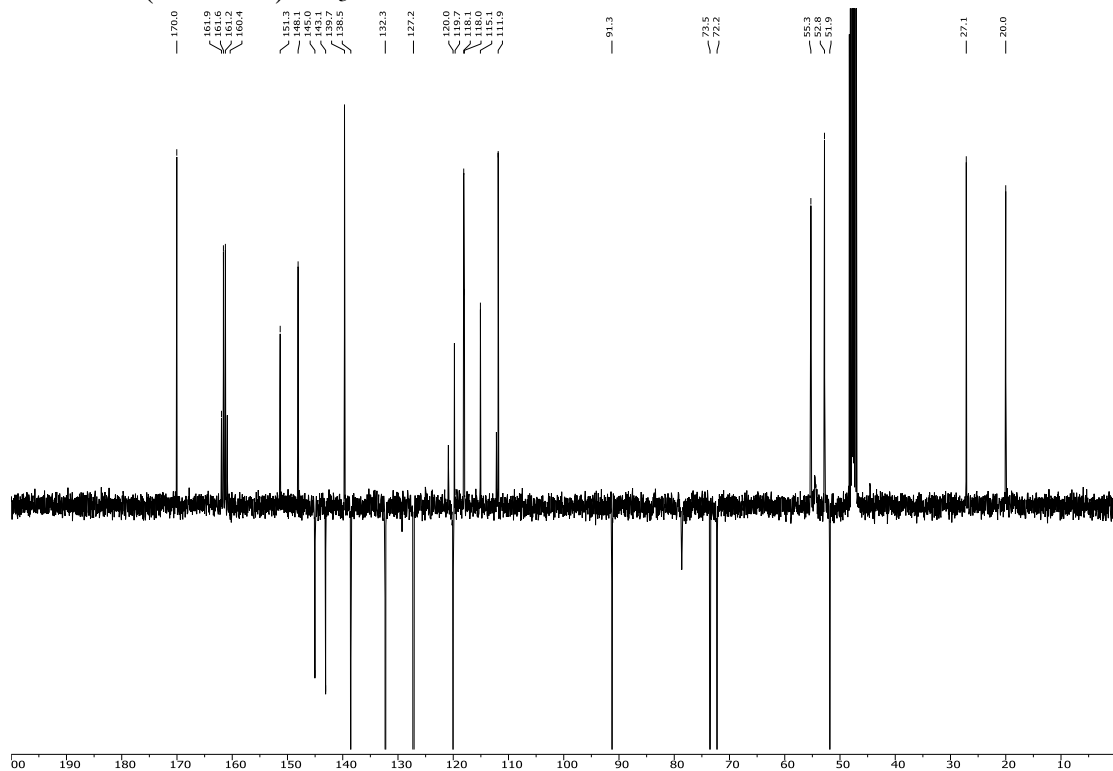

Compound **21b**  $^1\text{H}$  NMR (400 MHz)  $\text{CD}_3\text{OD}$

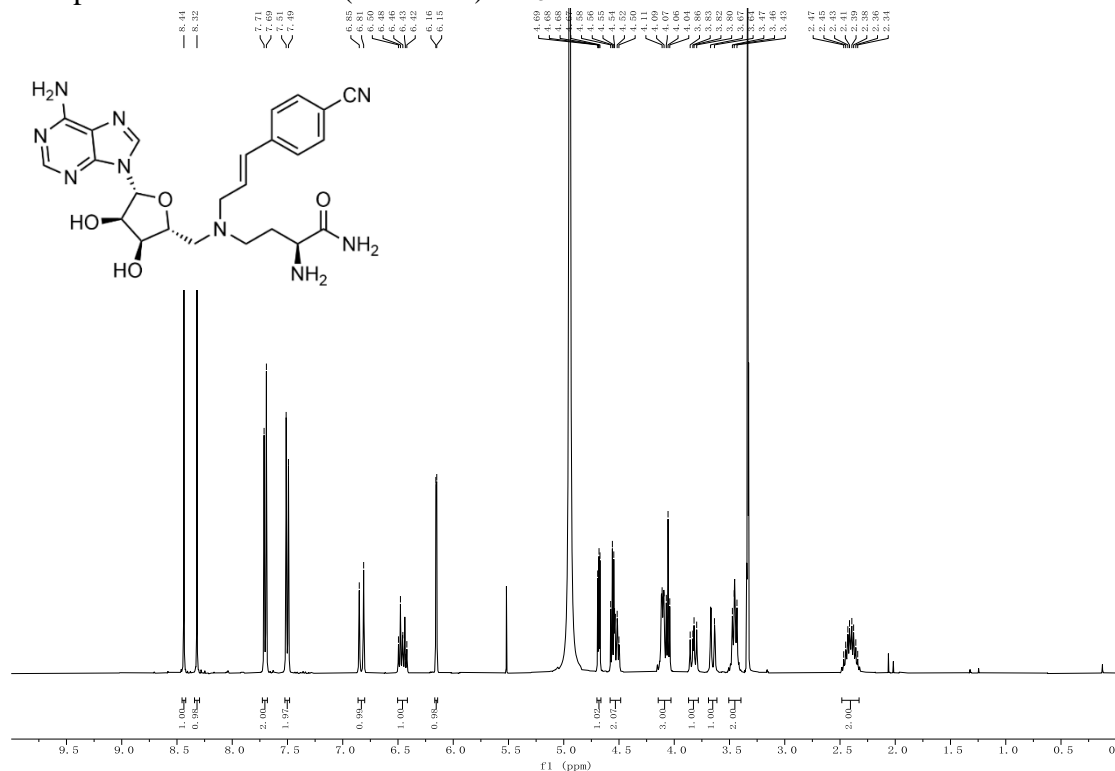

$^{13}\text{C}$  NMR (101 MHz)  $\text{CD}_3\text{OD}$

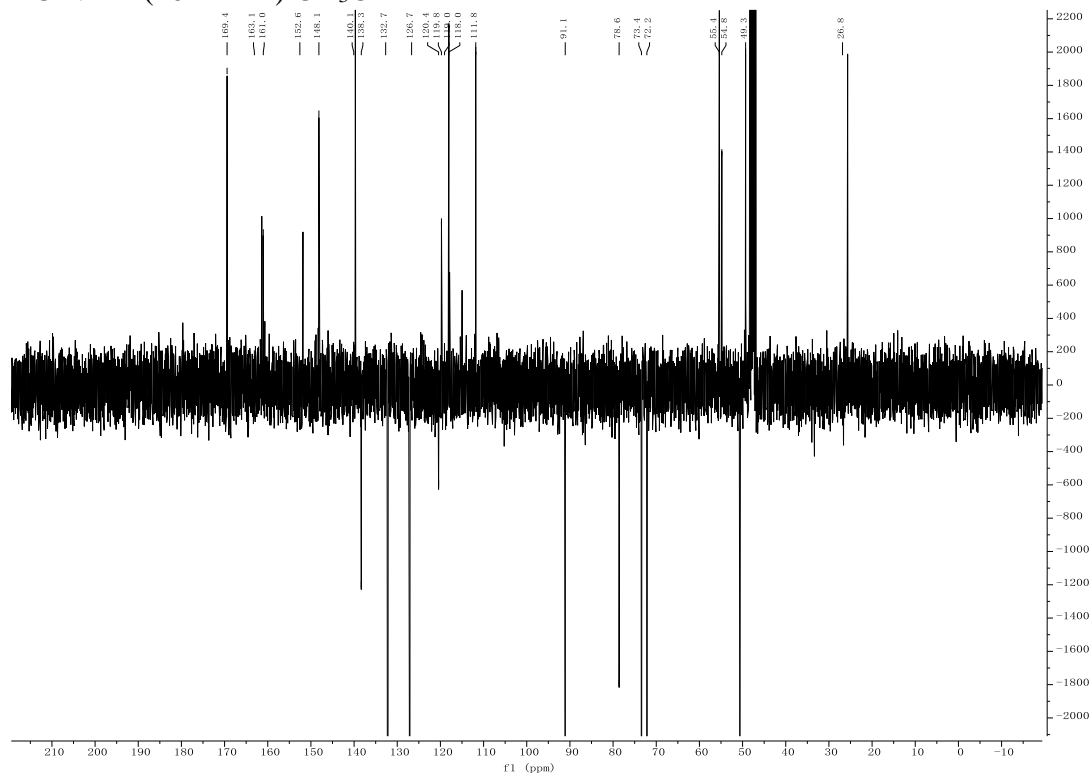

Compound **21c**  $^1\text{H}$  NMR (400 MHz)  $\text{CD}_3\text{OD}$

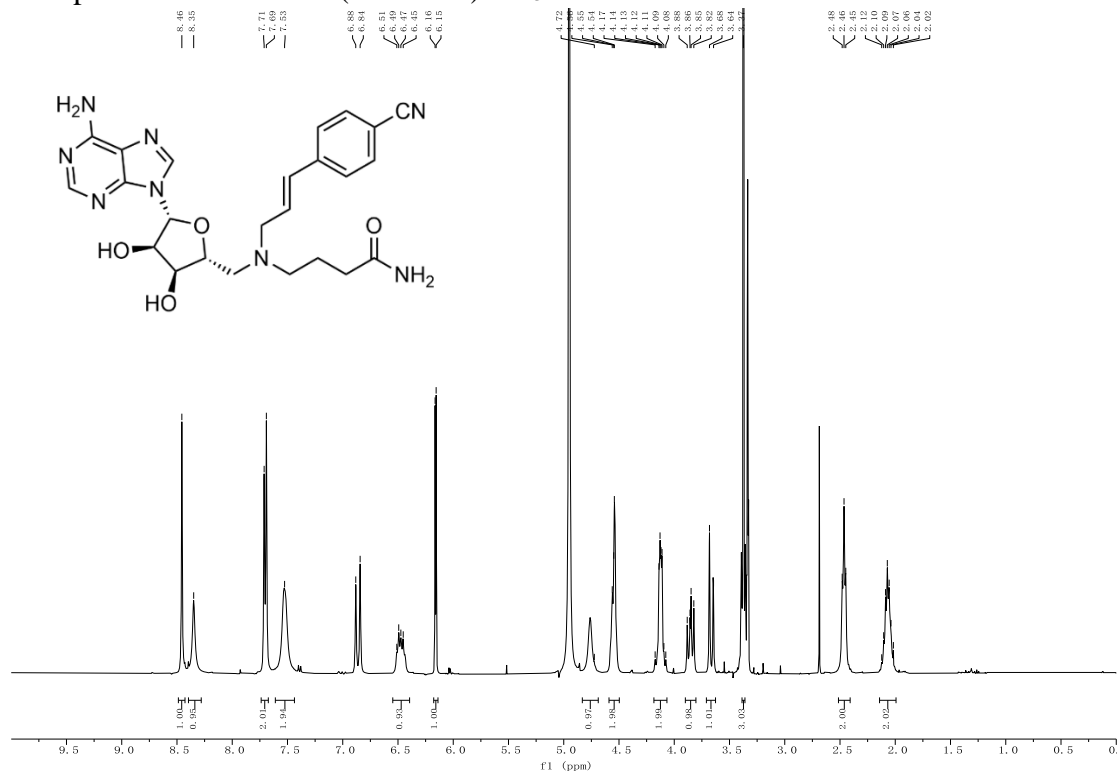

$^{13}\text{C}$  NMR (101 MHz)  $\text{CD}_3\text{OD}$

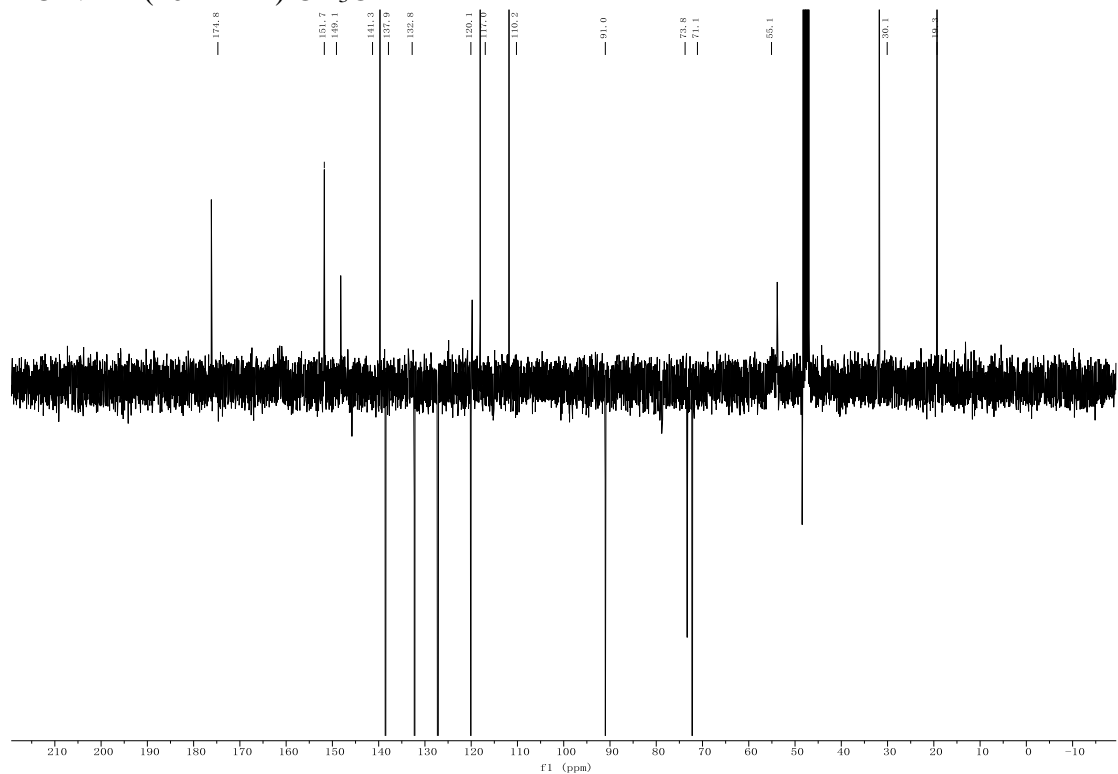

Compound **21d** <sup>1</sup>H NMR (400 MHz) CD<sub>3</sub>OD

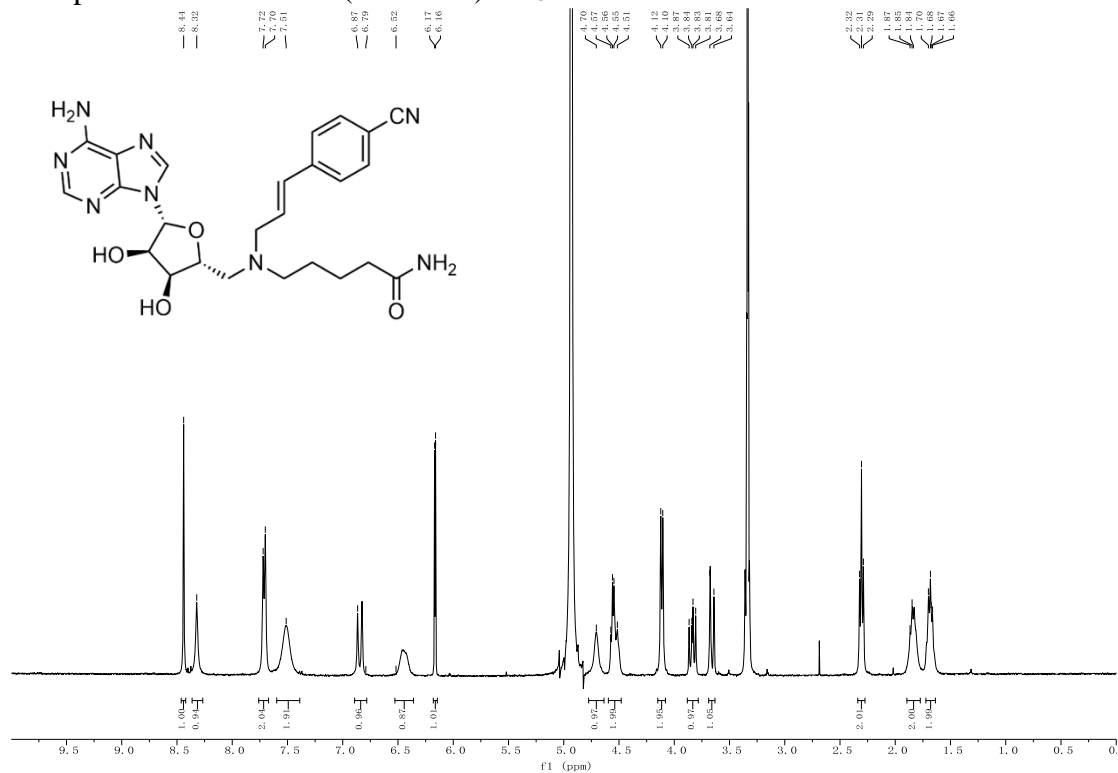

<sup>13</sup>C NMR (101 MHz) CD<sub>3</sub>OD

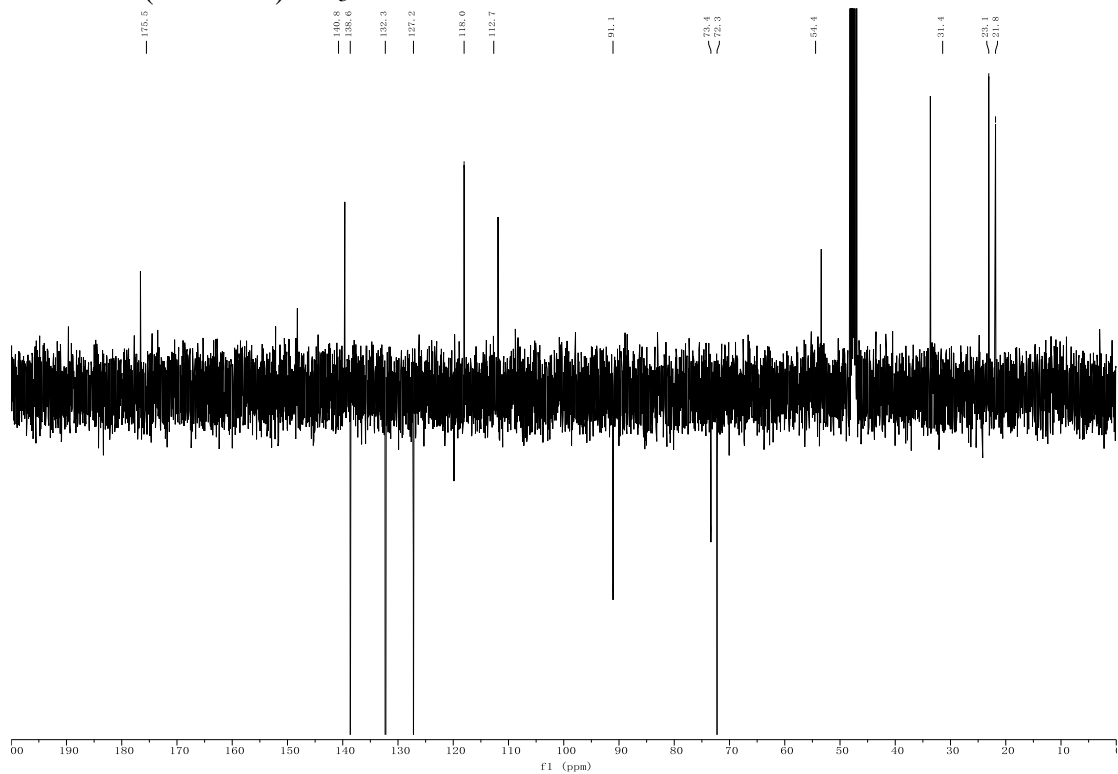

Compound **21e**  $^1\text{H}$  NMR (500 MHz)  $\text{CD}_3\text{OD}$

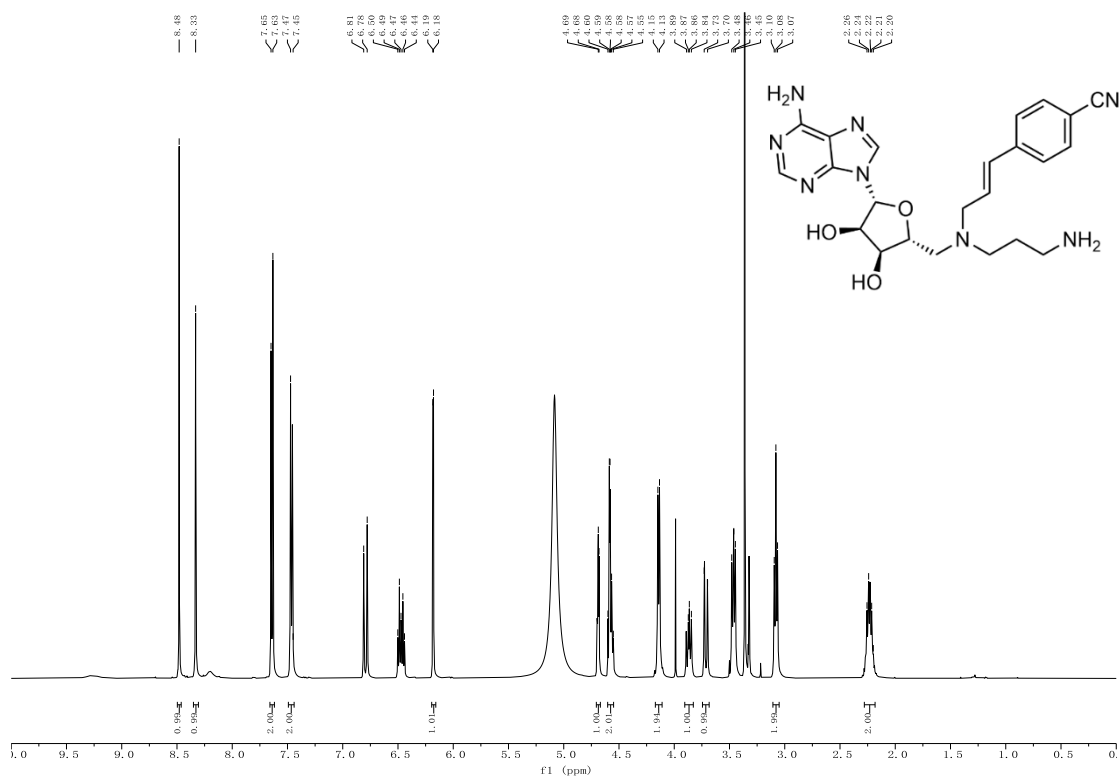

$^{13}\text{C}$  NMR (126 MHz)  $\text{CD}_3\text{OD}$

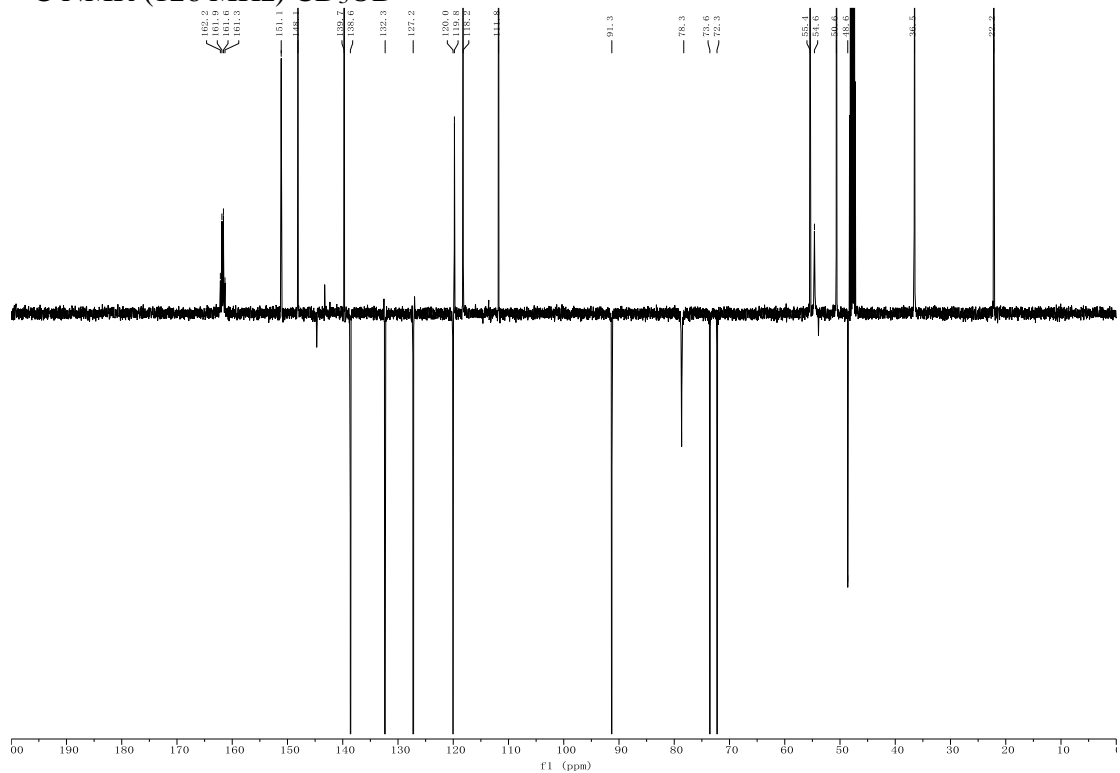

Compound **21f**  $^1\text{H}$  NMR (400 MHz)  $\text{CD}_3\text{OD}$

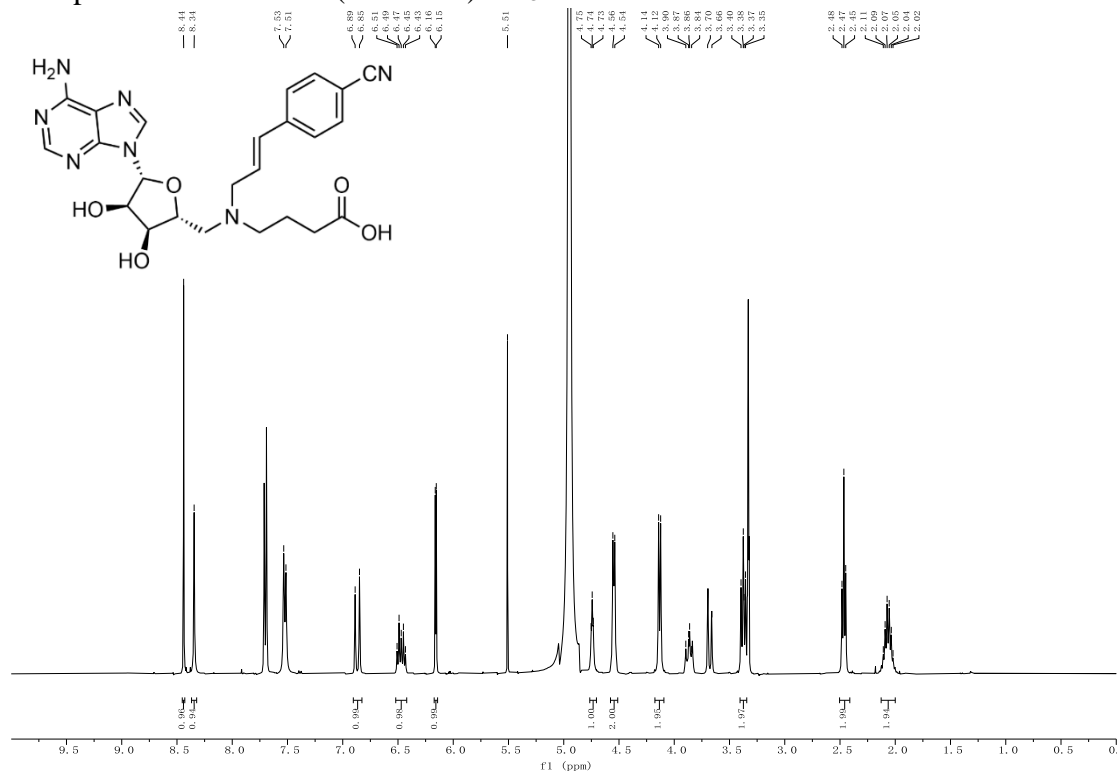

$^{13}\text{C}$  NMR (101 MHz)  $\text{CD}_3\text{OD}$

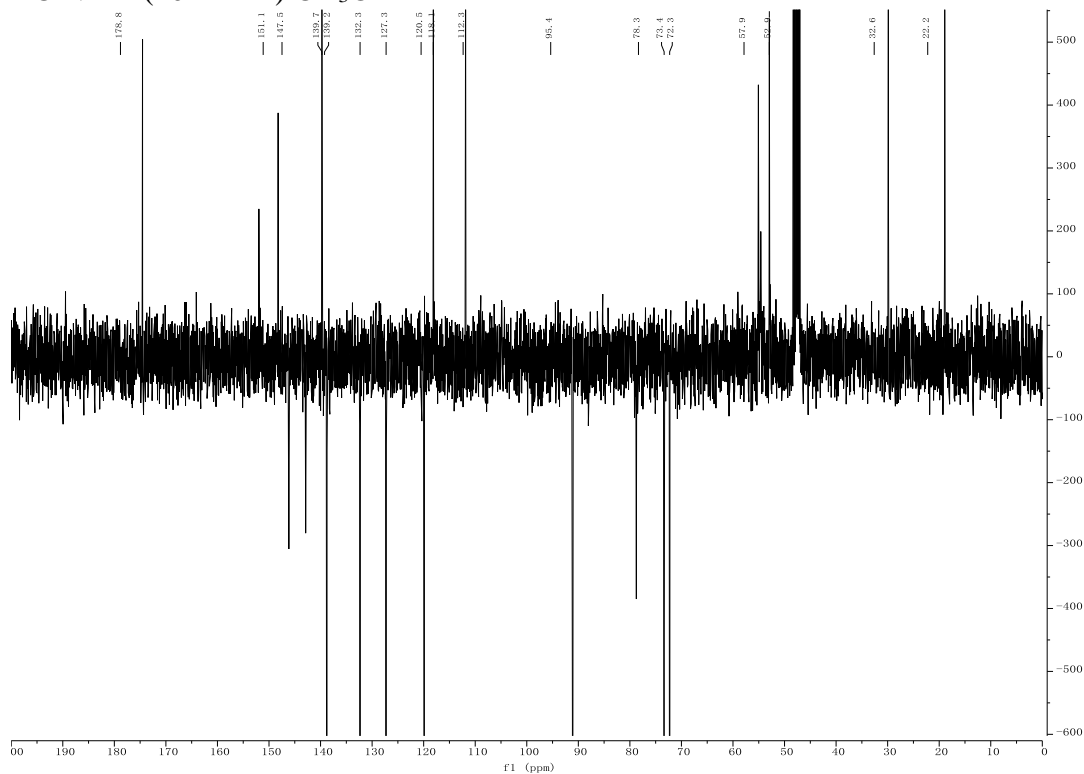

Compound **21g**  $^1\text{H}$  NMR (400 MHz)  $\text{CD}_3\text{OD}$

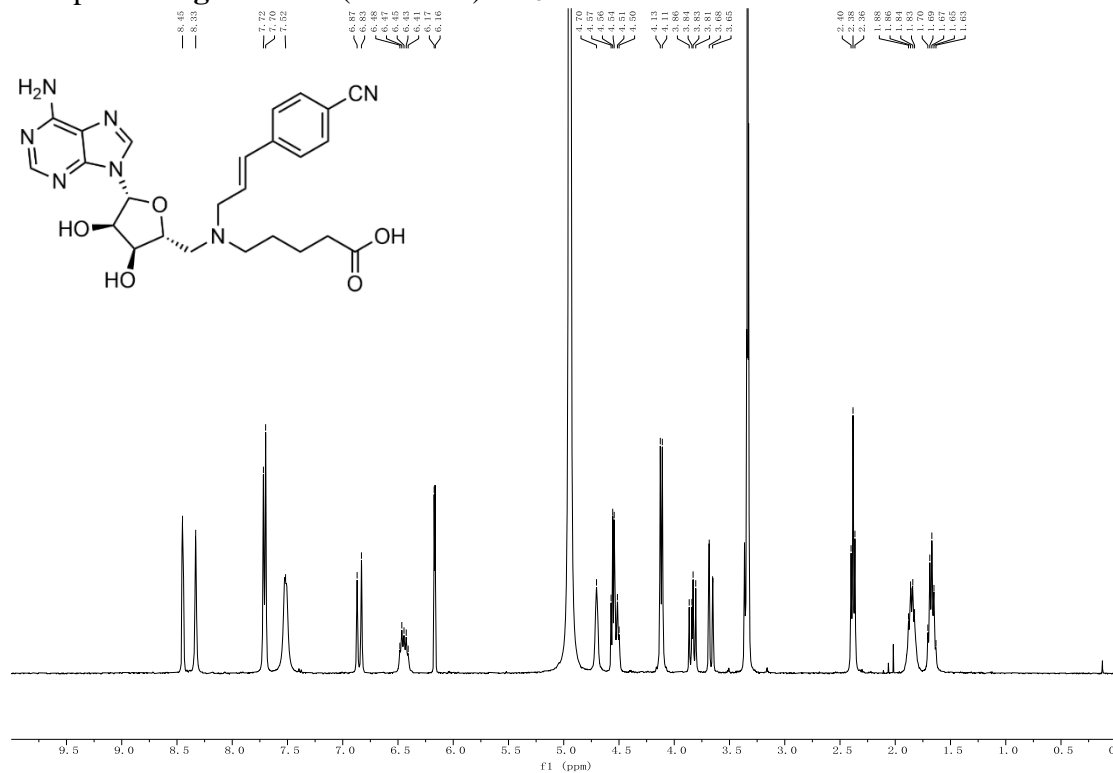

$^{13}\text{C}$  NMR (101 MHz)  $\text{CD}_3\text{OD}$

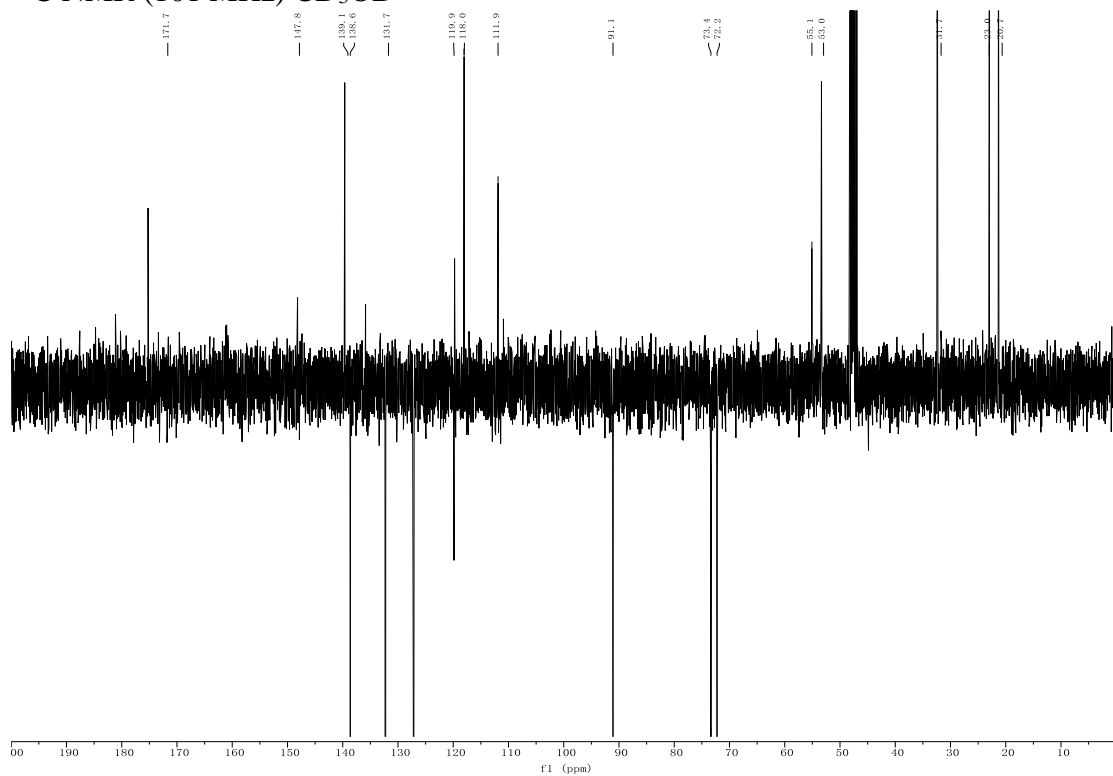

Compound **21h**  $^1\text{H}$  NMR (400 MHz)  $\text{CD}_3\text{OD}$

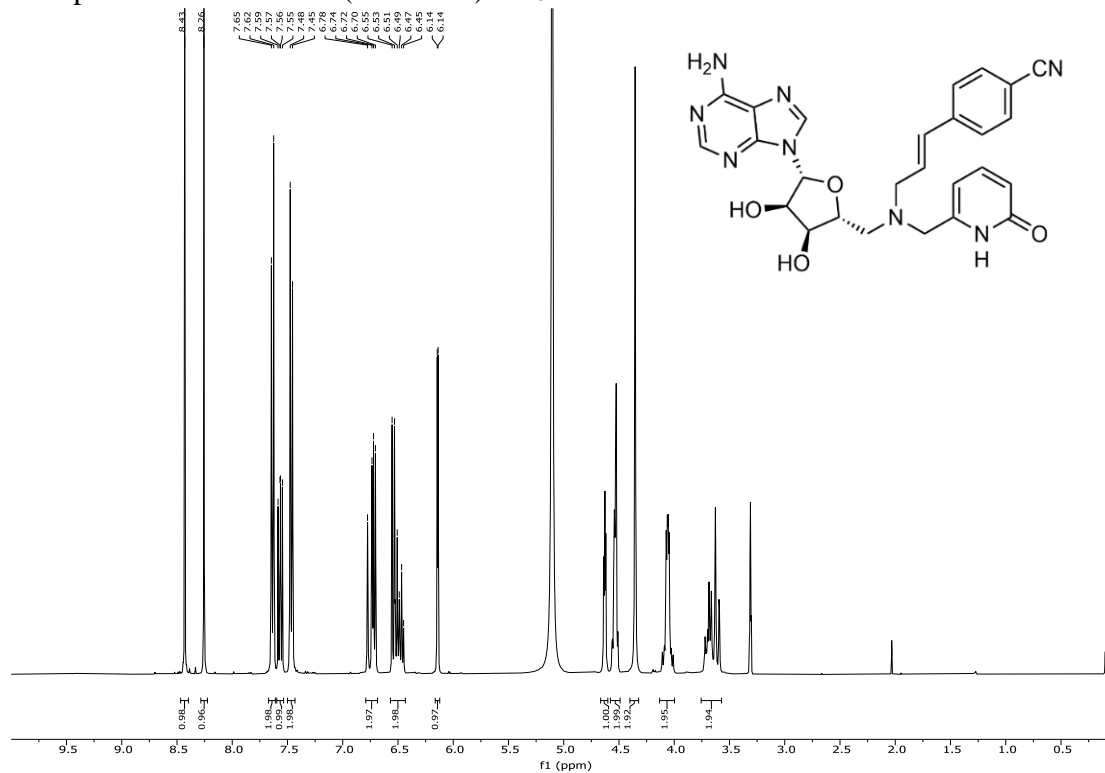

$^{13}\text{C}$  NMR (101 MHz)  $\text{CD}_3\text{OD}$

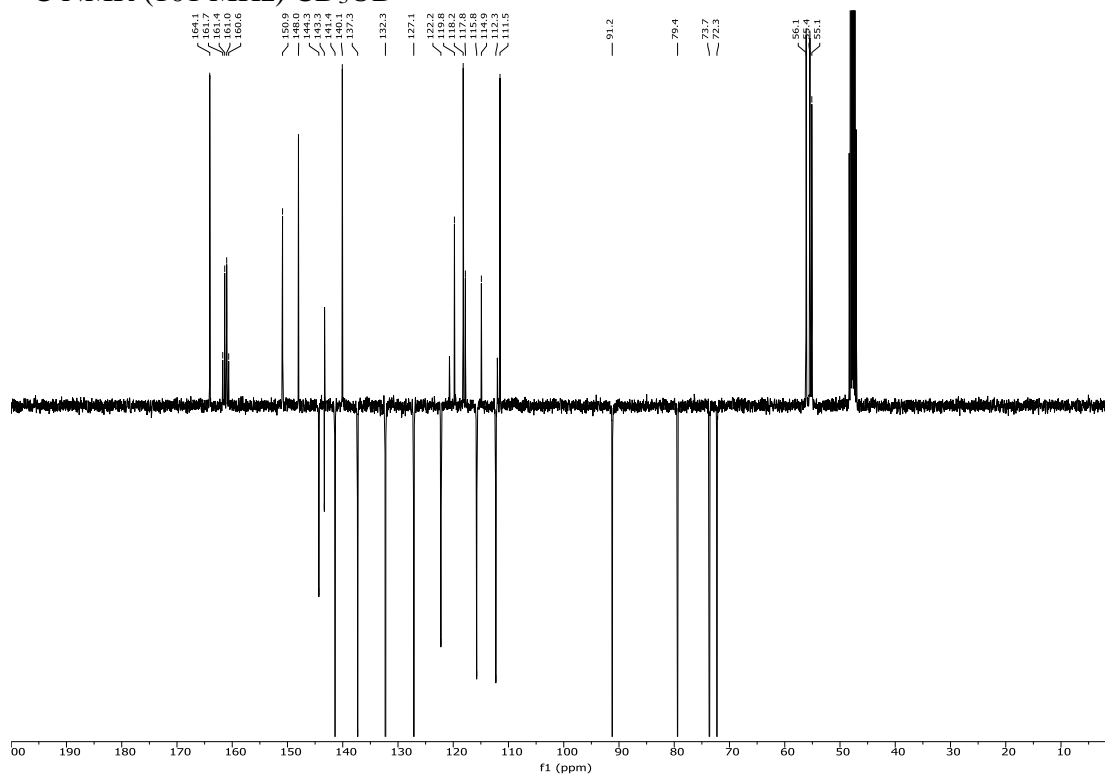



Compound **21i**  $^1\text{H}$  NMR (500 MHz)  $\text{CD}_3\text{OD}$

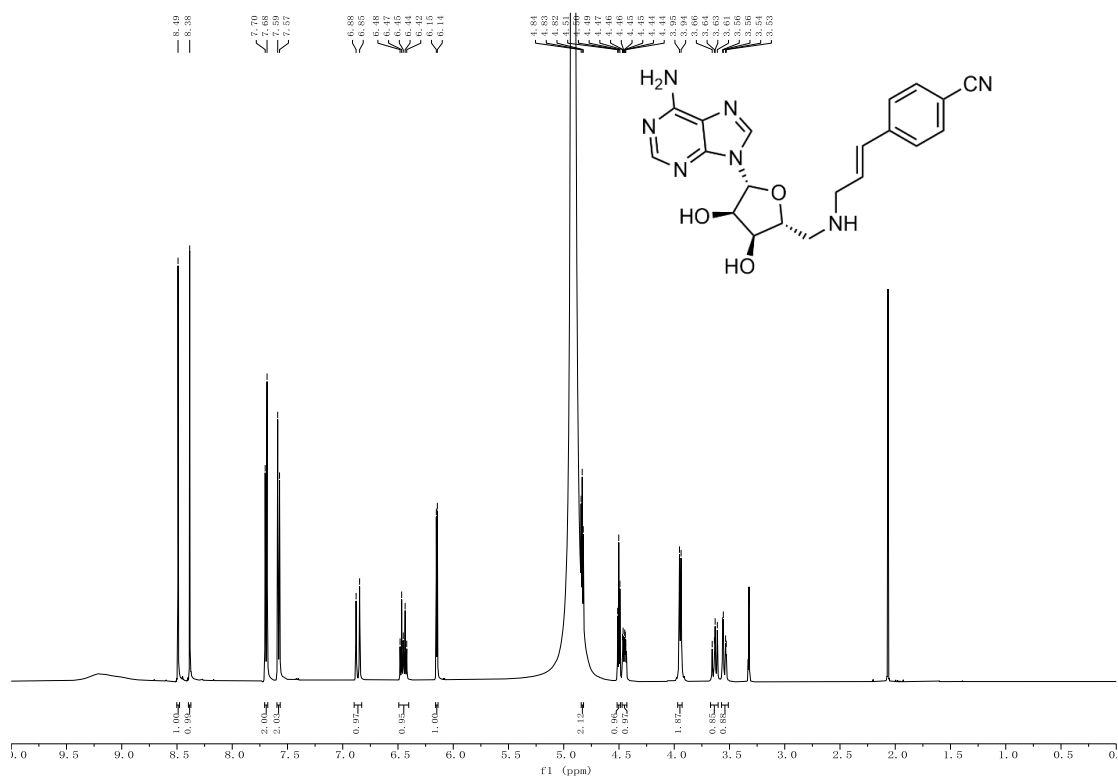

$^{13}\text{C}$  NMR (126 MHz)  $\text{CD}_3\text{OD}$

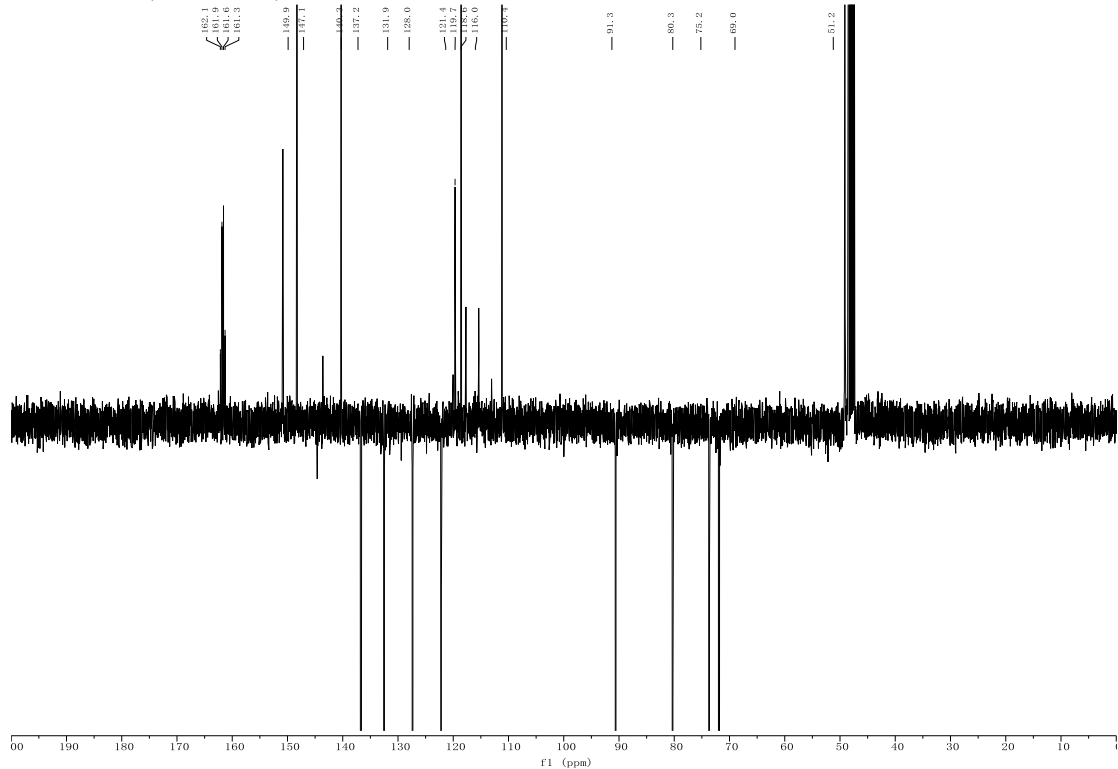

Compound **21j**  $^1\text{H}$  NMR (400 MHz)  $\text{CD}_3\text{OD}$

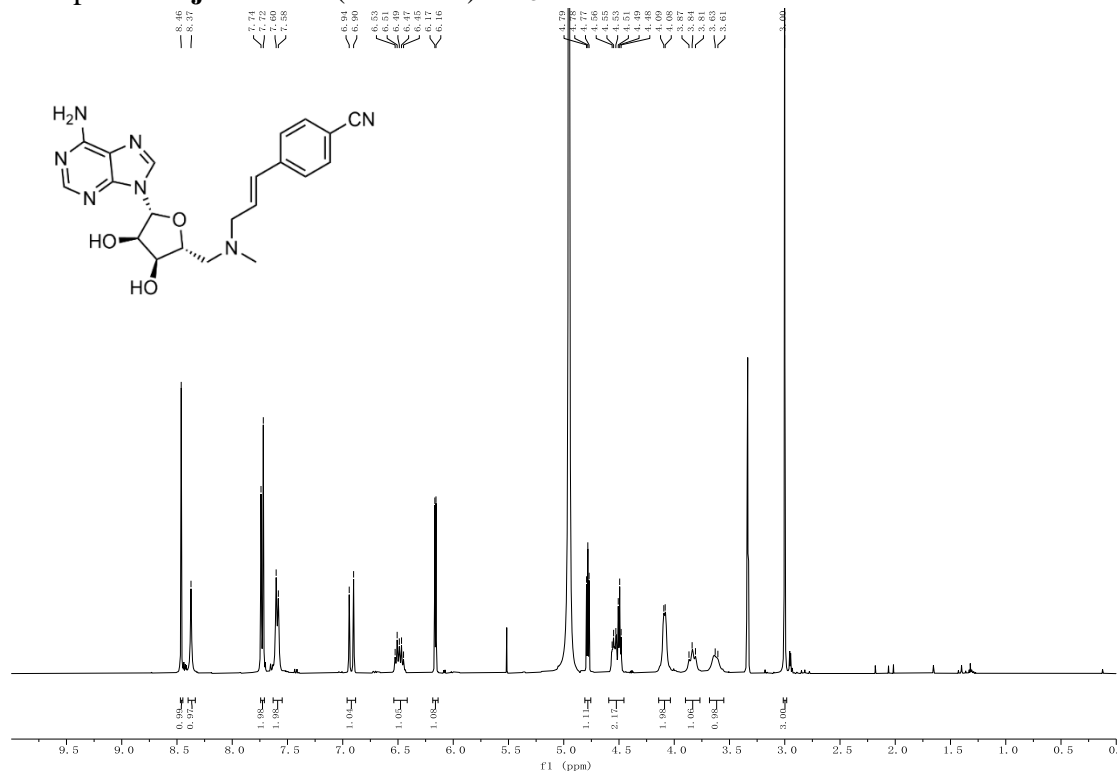

$^{13}\text{C}$  NMR (101 MHz)  $\text{CD}_3\text{OD}$

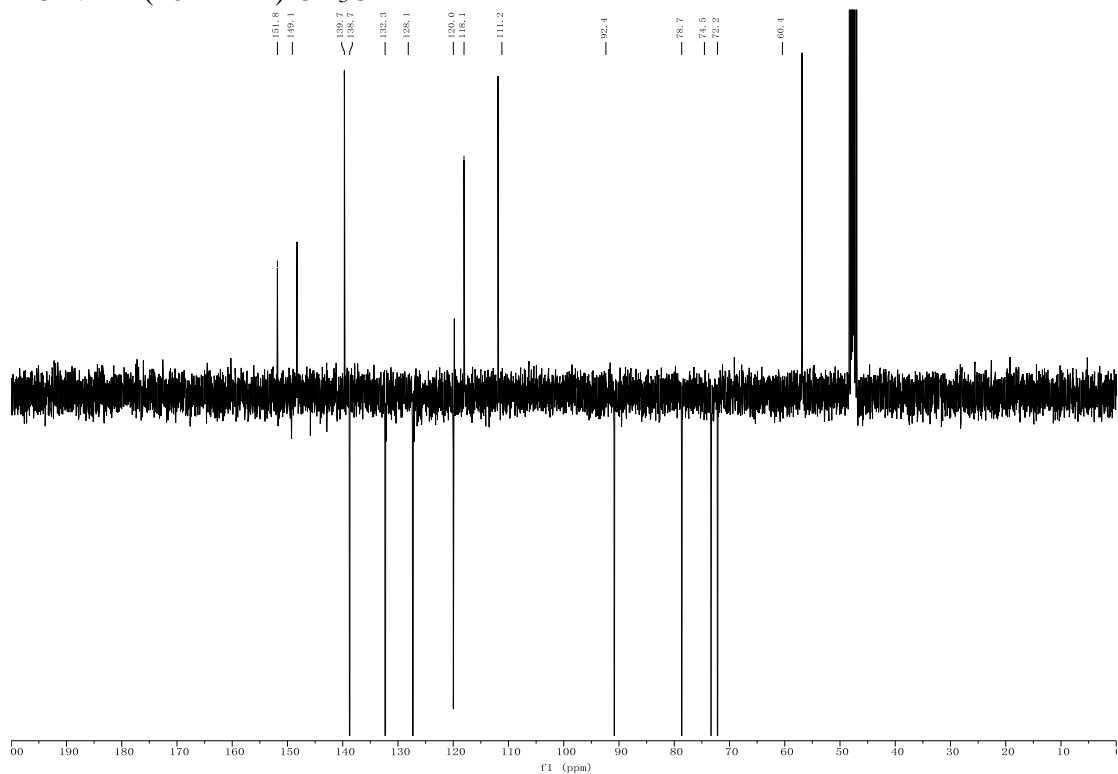

Compound **21k** <sup>1</sup>H NMR (500 MHz) CD<sub>3</sub>OD

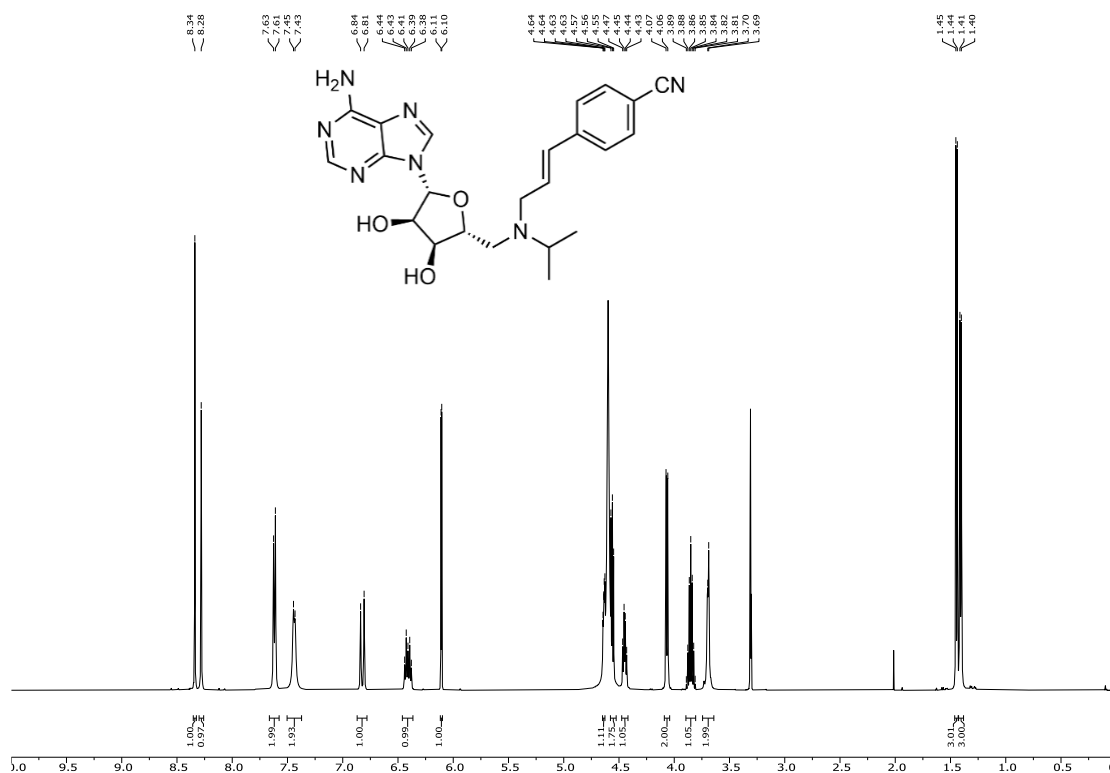

<sup>13</sup>C NMR (126 MHz) CD<sub>3</sub>OD

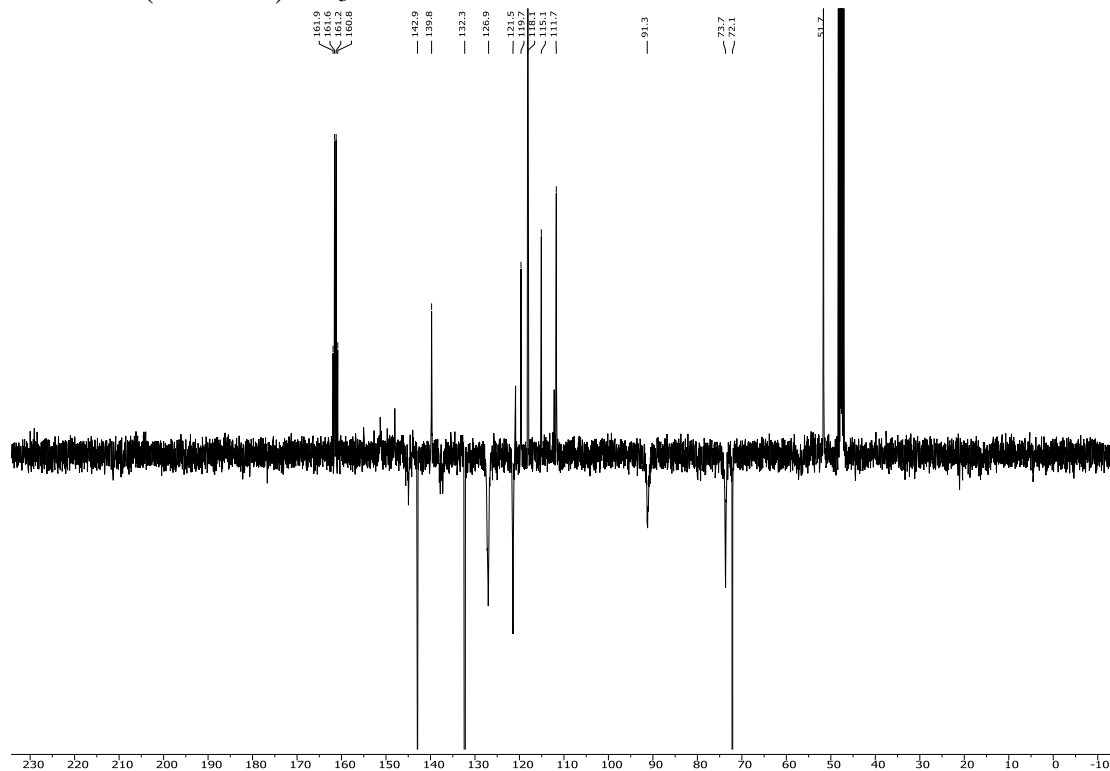

Compound **22b**  $^1\text{H}$  NMR (400 MHz)  $\text{CD}_3\text{OD}$

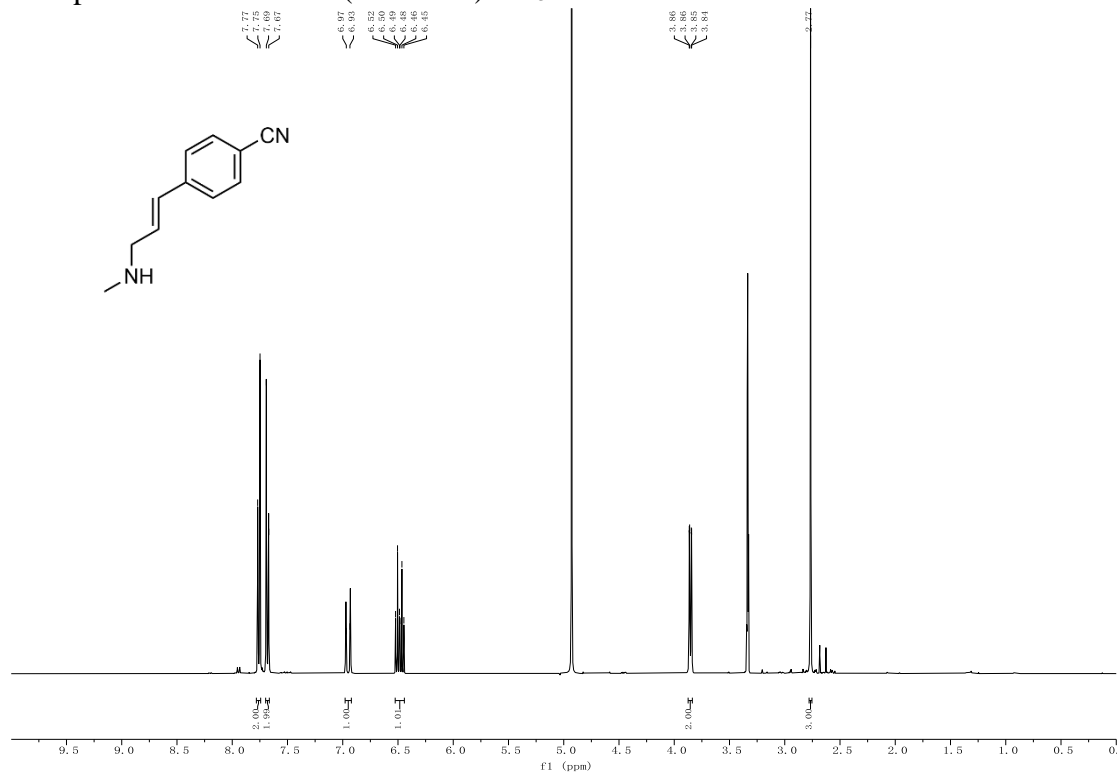

$^{13}\text{C}$  NMR (101 MHz)  $\text{CD}_3\text{OD}$

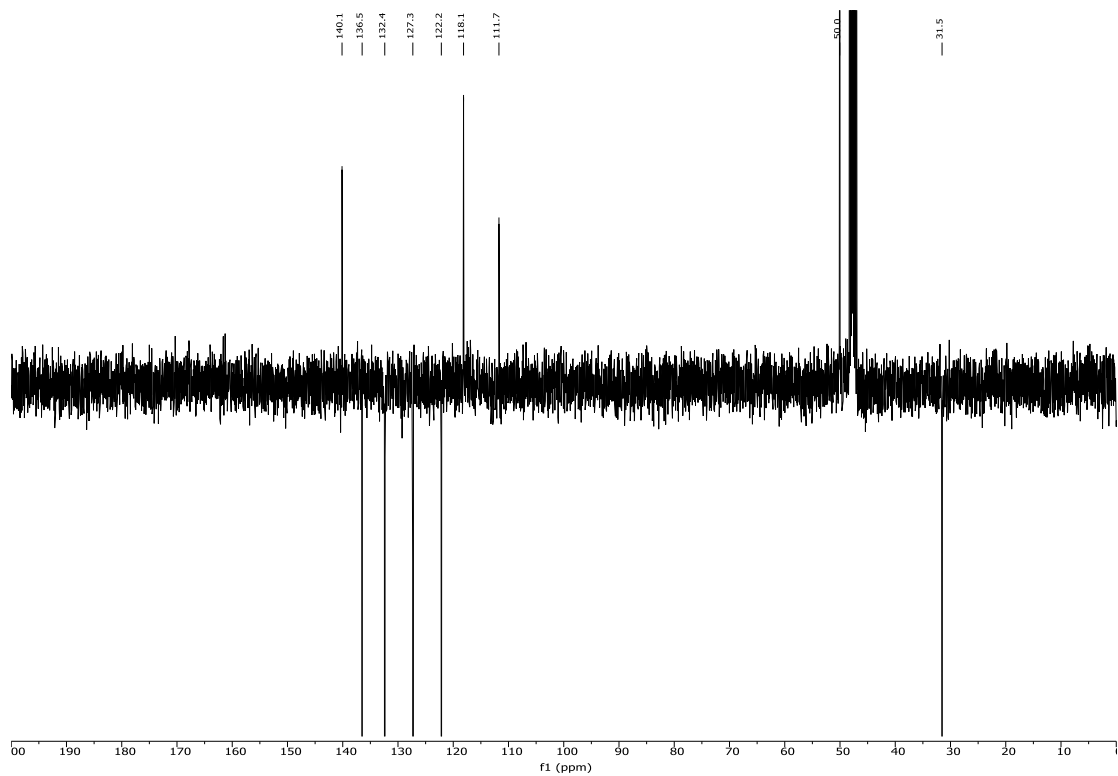

Compound **23a**  $^1\text{H}$  NMR (400 MHz)  $\text{CDCl}_3$

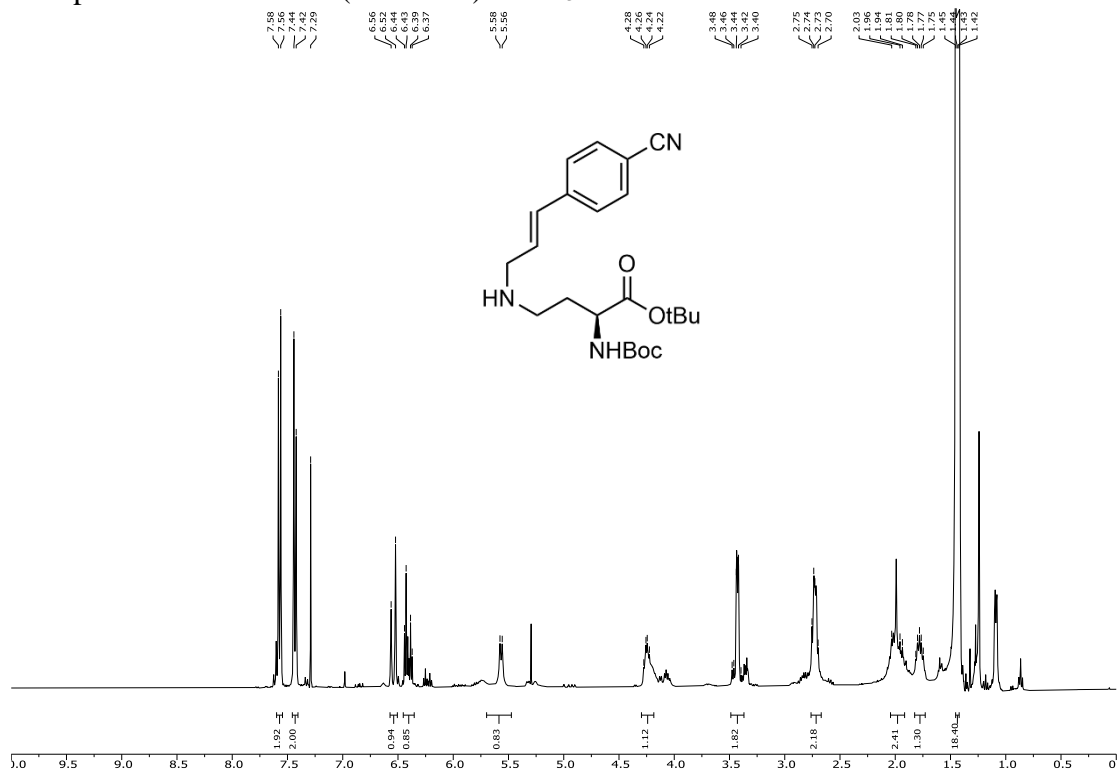

$^{13}\text{C}$  NMR (101 MHz)  $\text{CDCl}_3$

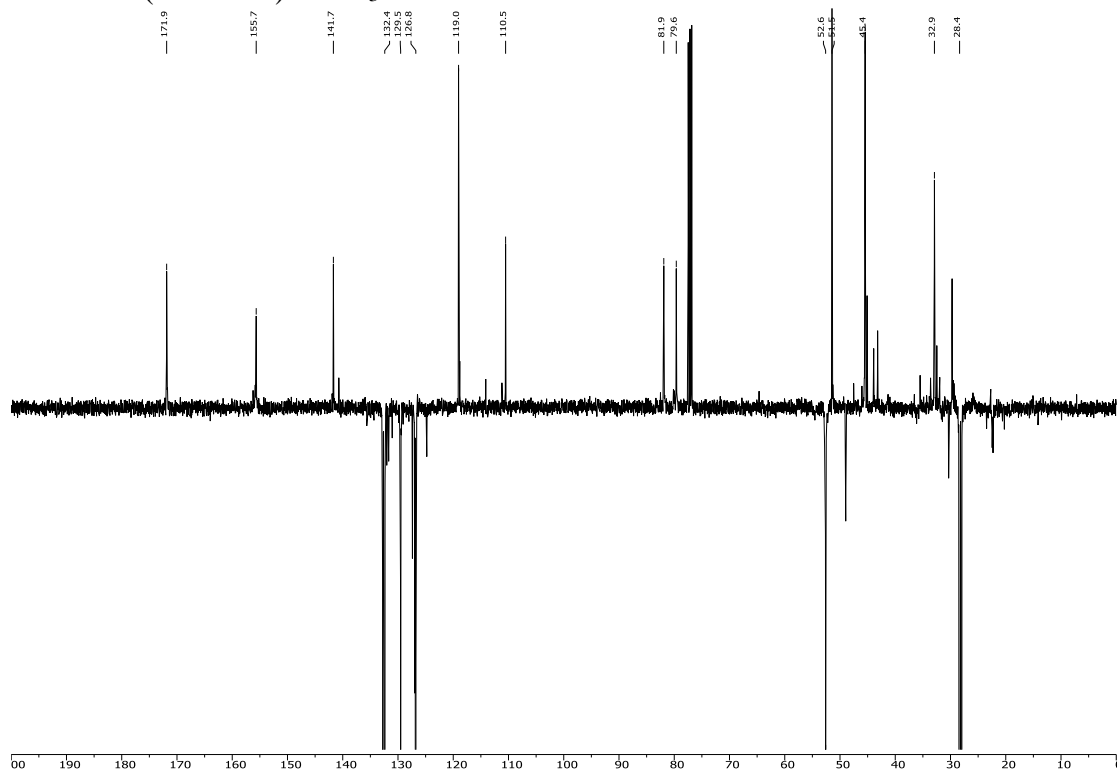

Compound **23b**  $^1\text{H}$  NMR (400 MHz)  $\text{CDCl}_3$

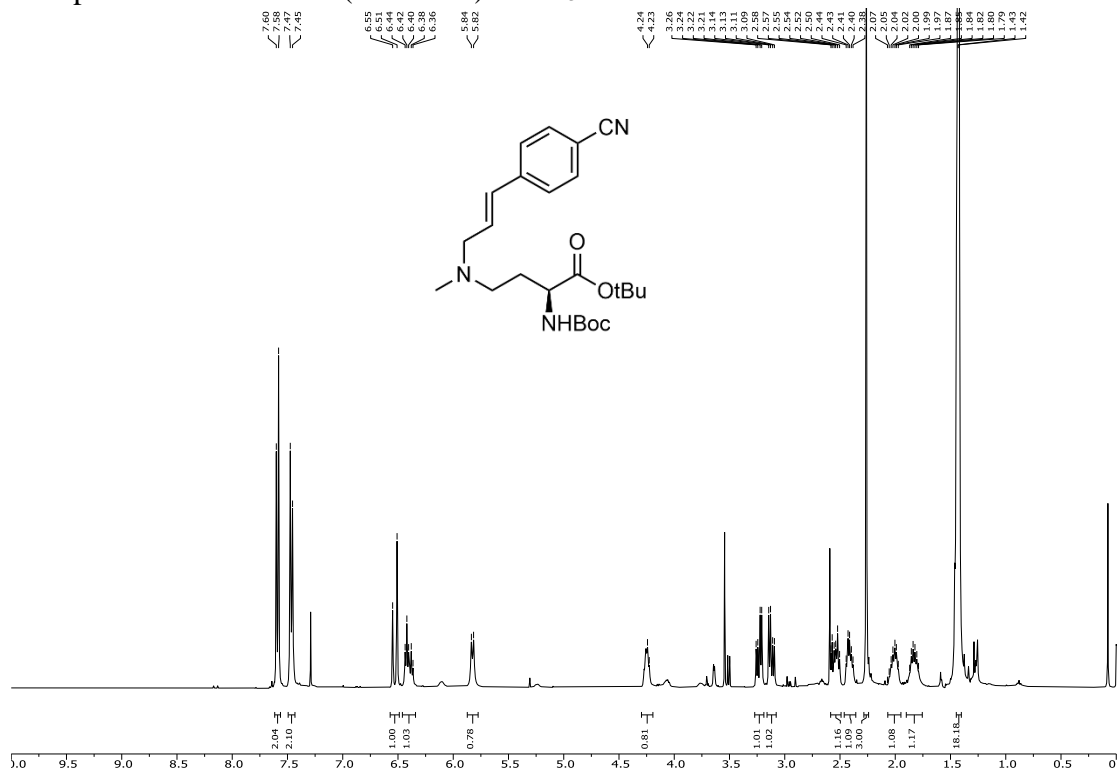

$^{13}\text{C}$  NMR (101 MHz)  $\text{CDCl}_3$

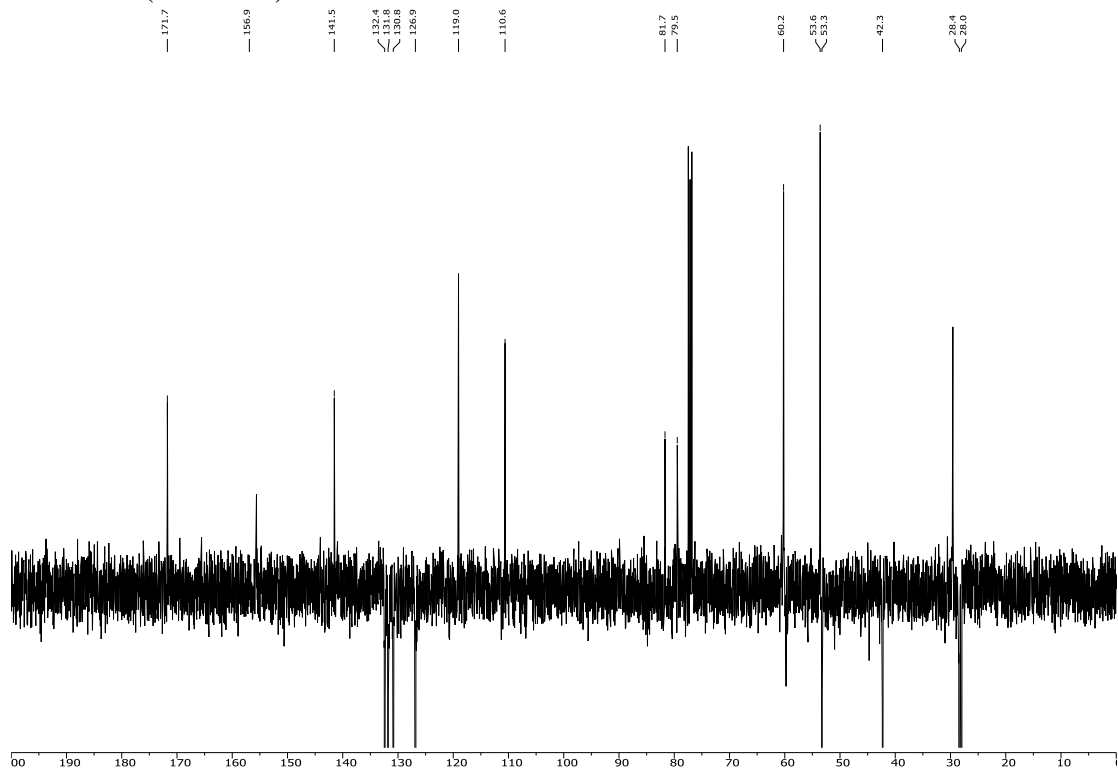

Compound **24a**  $^1\text{H}$  NMR (400 MHz)  $\text{CD}_3\text{OD}$

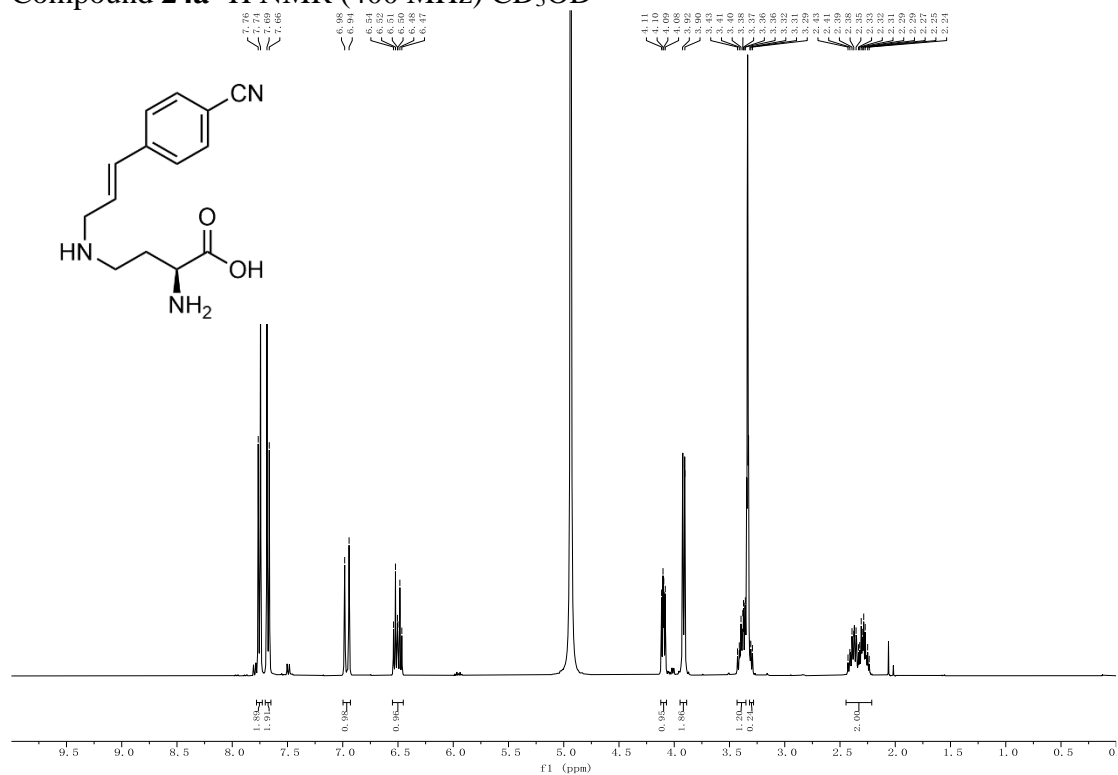

$^{13}\text{C}$  NMR (101 MHz)  $\text{CD}_3\text{OD}$

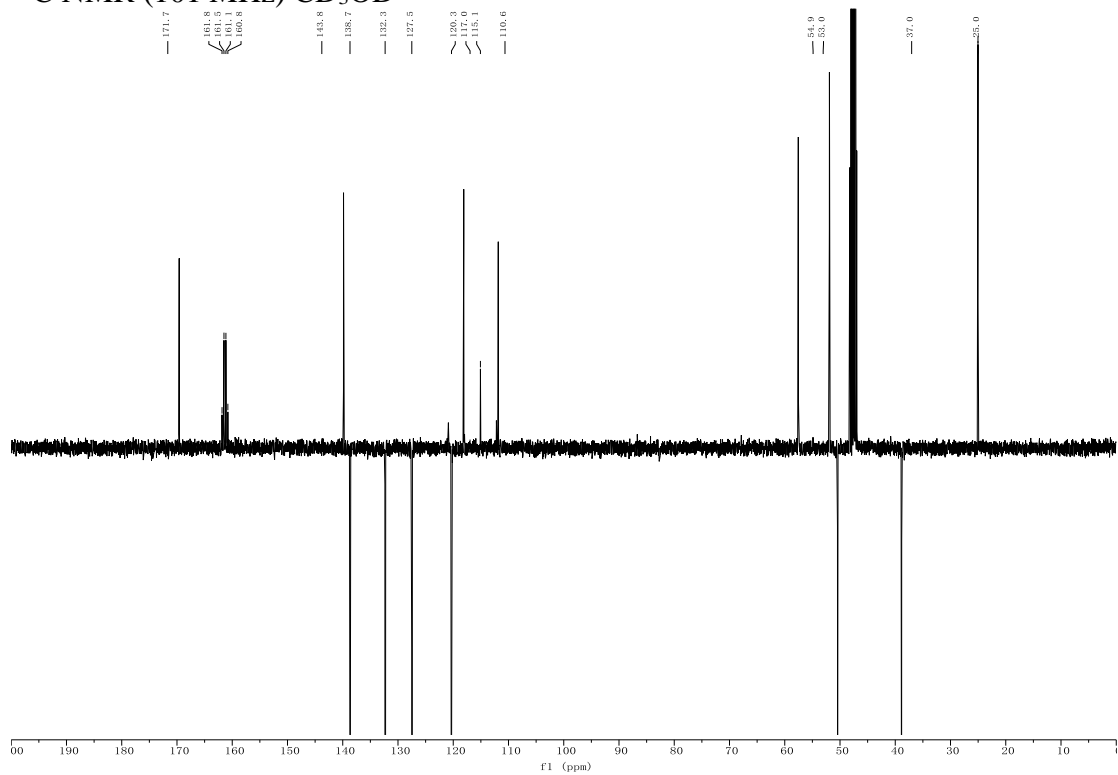

Compound **24b** <sup>1</sup>H NMR (400 MHz) CD<sub>3</sub>OD

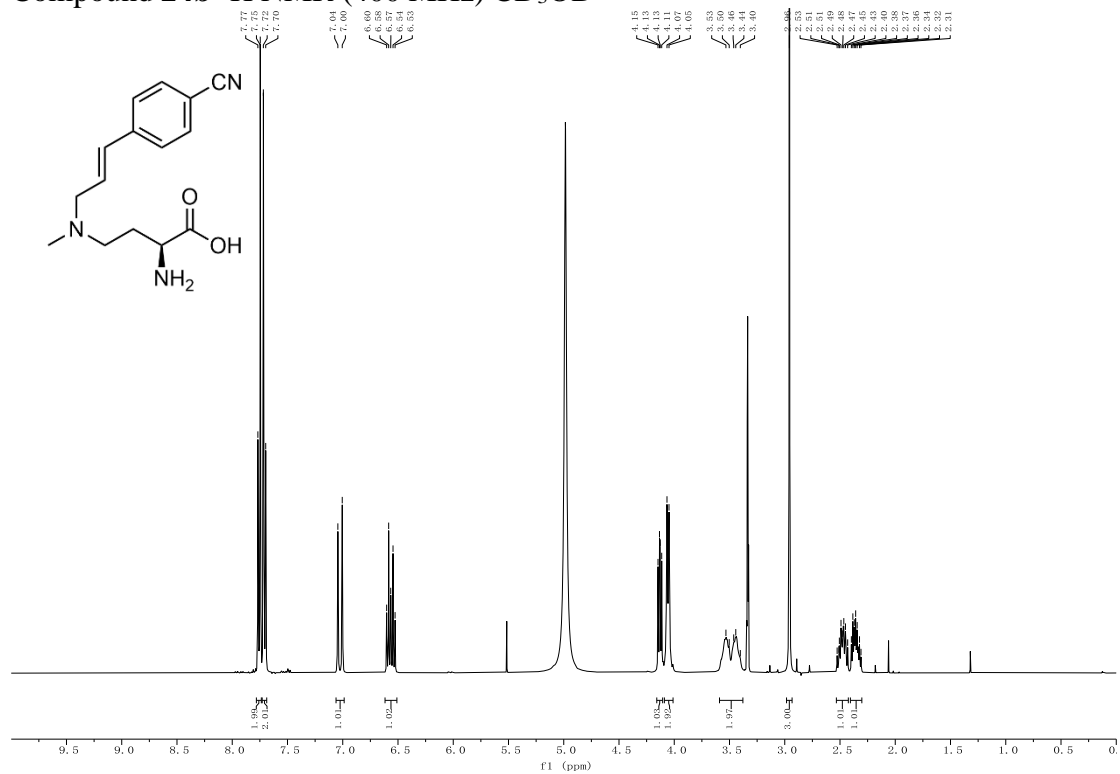

<sup>13</sup>C NMR (101 MHz) CD<sub>3</sub>OD

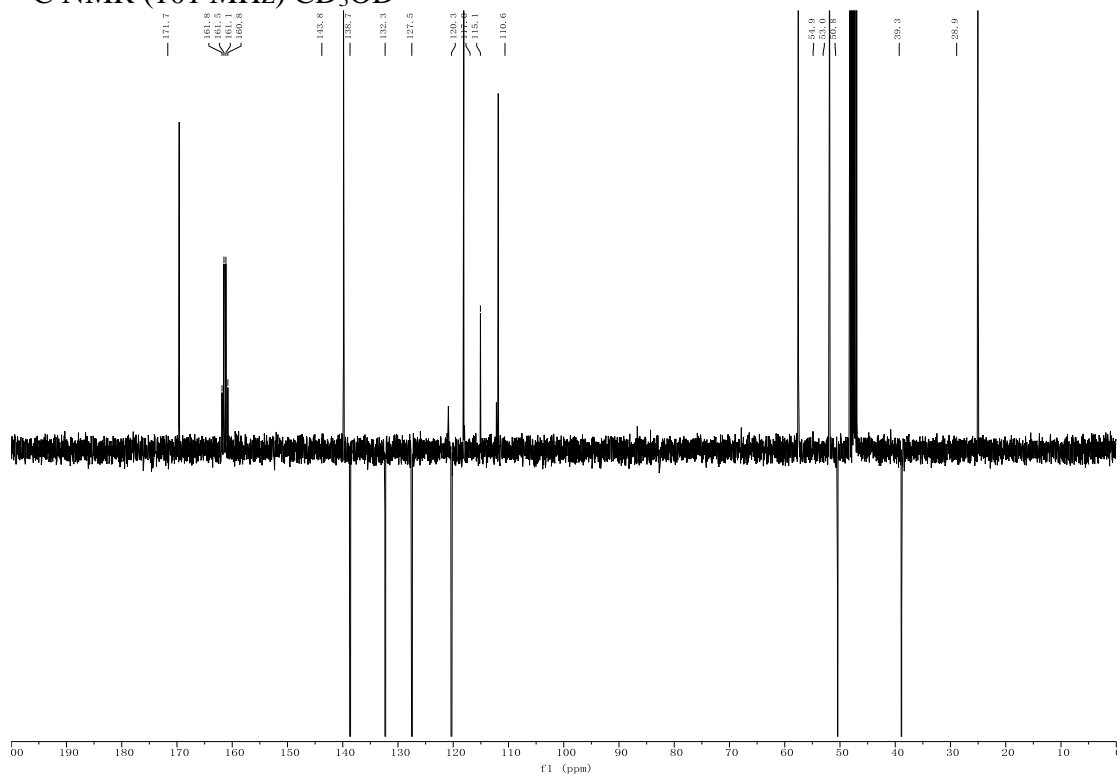



Compound **25a**  $^1\text{H}$  NMR (500 MHz)  $\text{CDCl}_3$

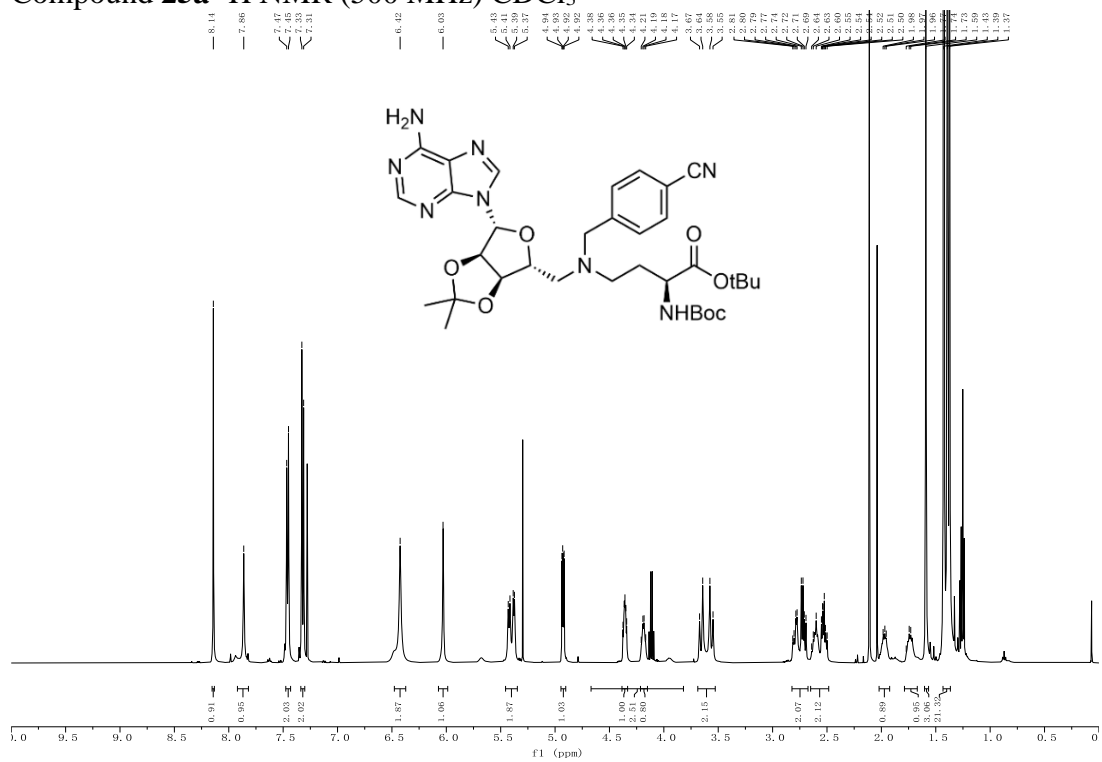

$^{13}\text{C}$  NMR (126 MHz)  $\text{CDCl}_3$

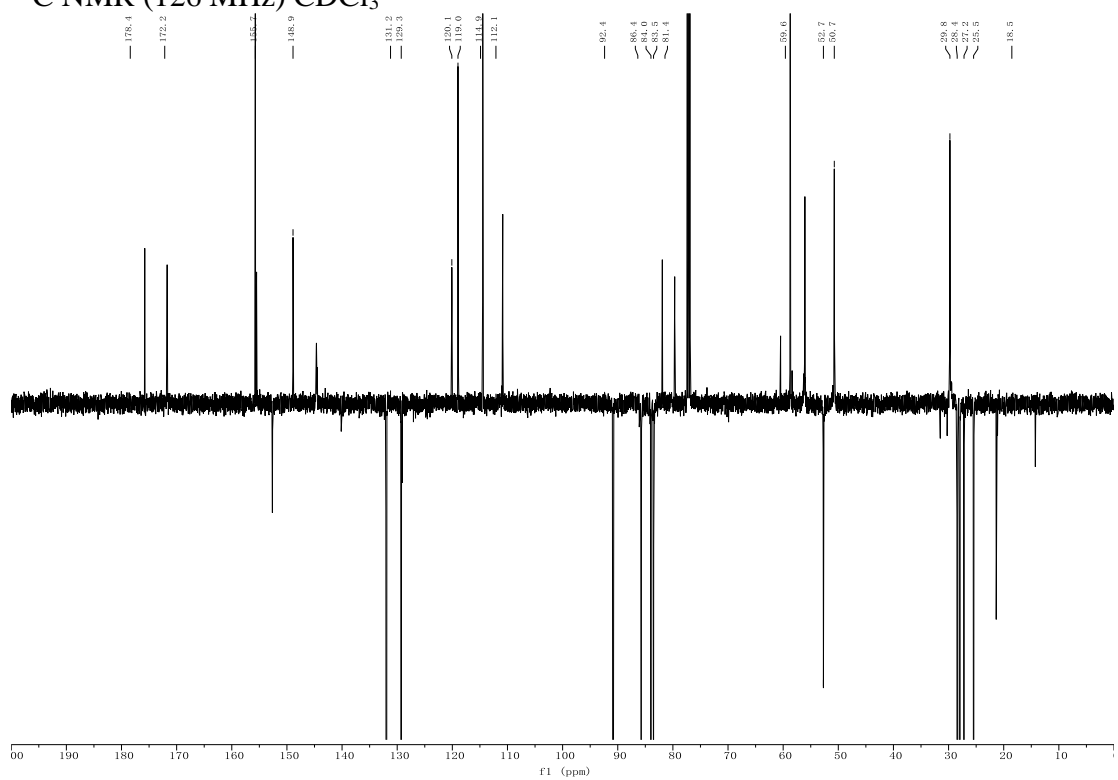

Compound **25** <sup>1</sup>H NMR (500 MHz) CD<sub>3</sub>OD

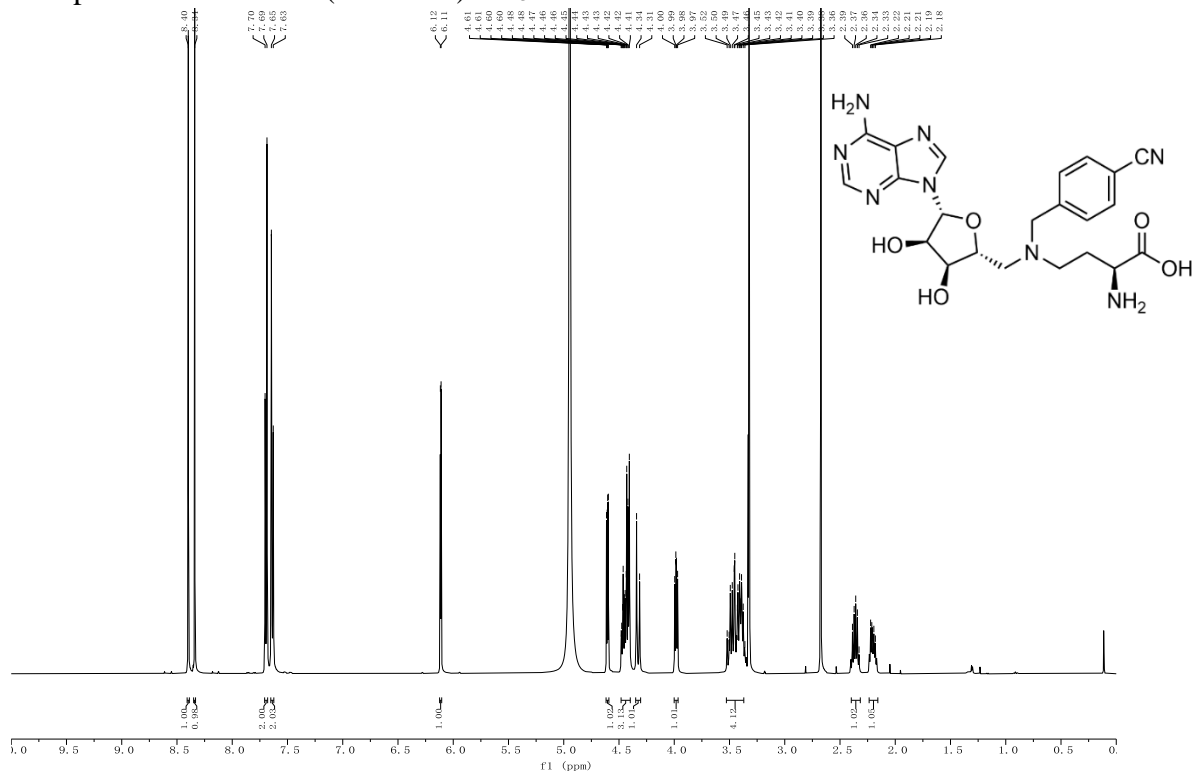

<sup>13</sup>C NMR (126 MHz) CD<sub>3</sub>OD

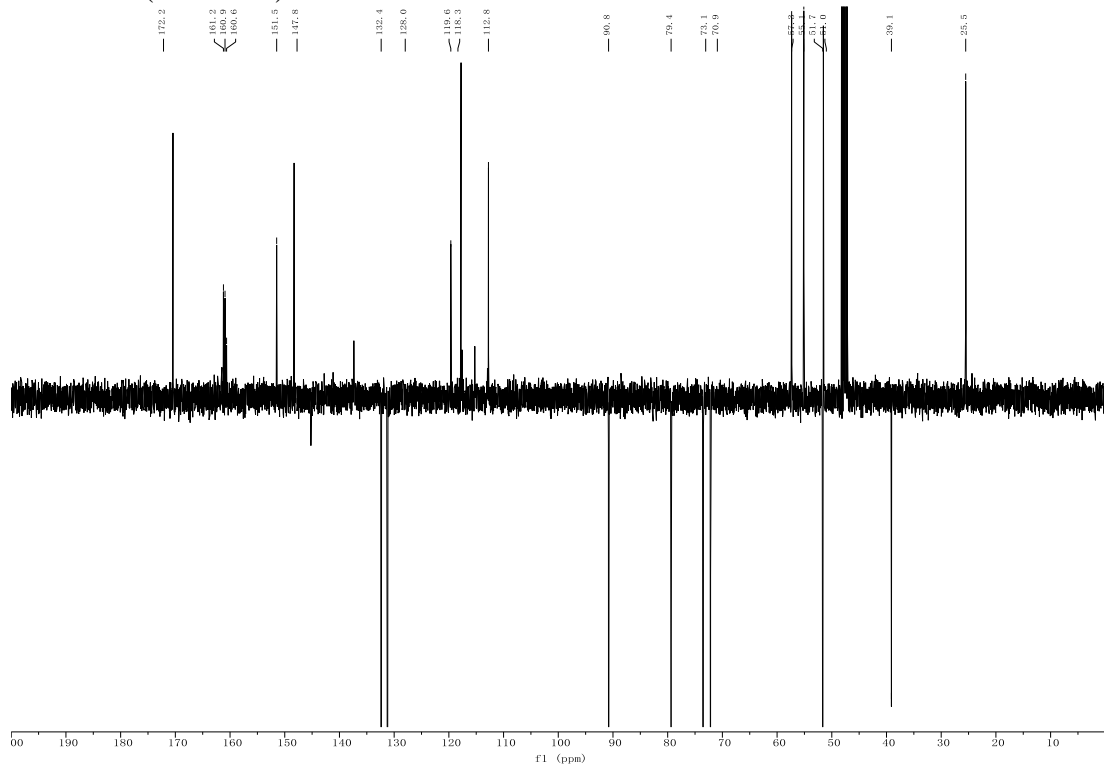

Compound **26a** <sup>1</sup>H NMR (400 MHz) CDCl<sub>3</sub>

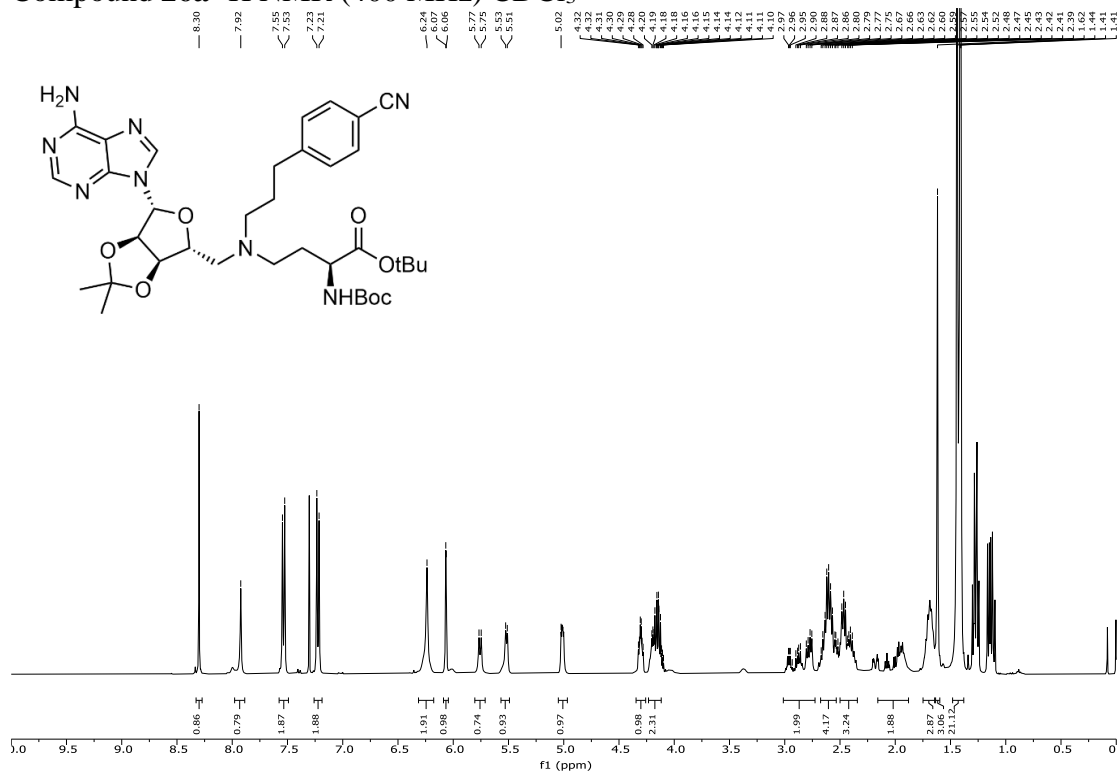

<sup>13</sup>C NMR (101 MHz) CDCl<sub>3</sub>

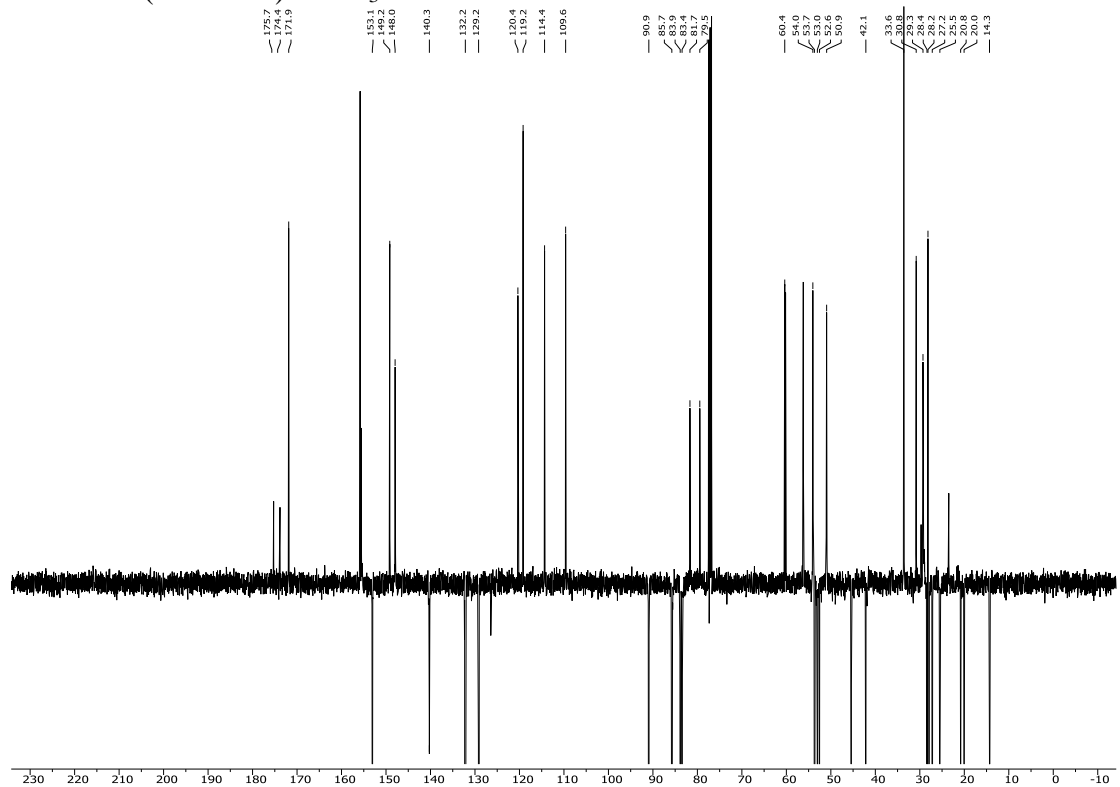

Compound **26**  $^1\text{H}$  NMR (400 MHz)  $\text{CD}_3\text{OD}$

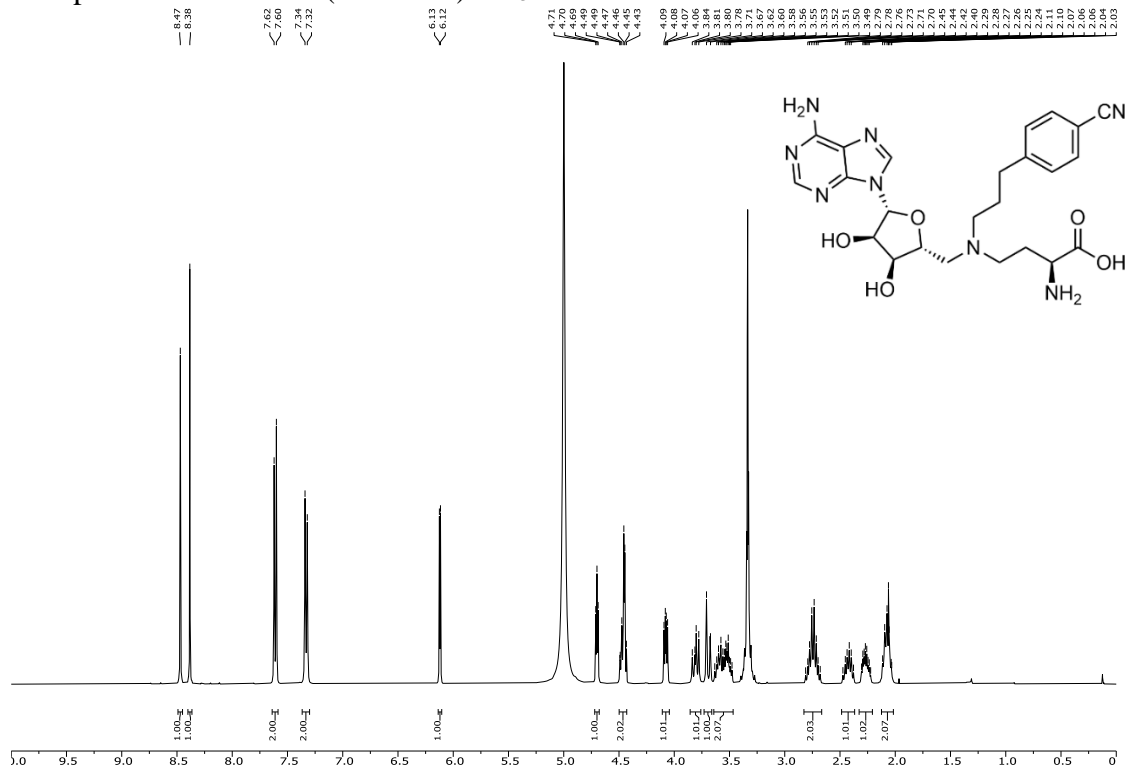

$^{13}\text{C}$  NMR (101 MHz)  $\text{CD}_3\text{OD}$

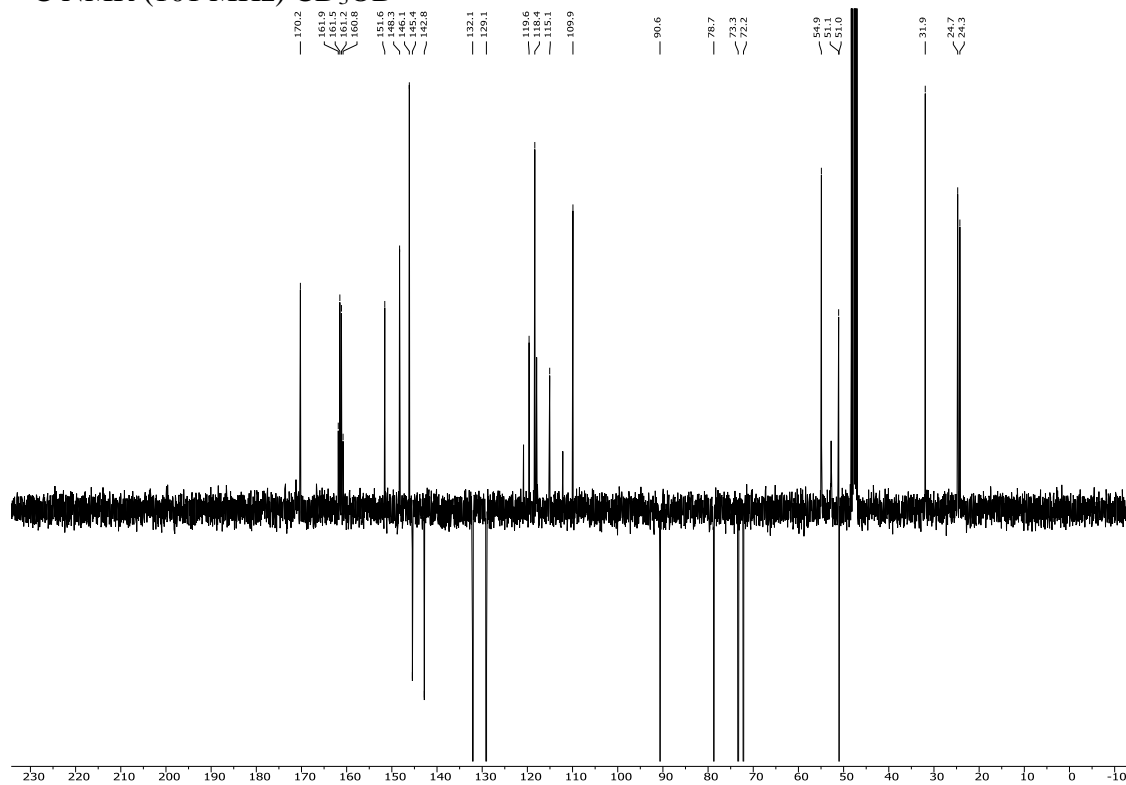

Compound **27**  $^1\text{H}$  NMR (500 MHz)  $\text{CD}_3\text{OD}$

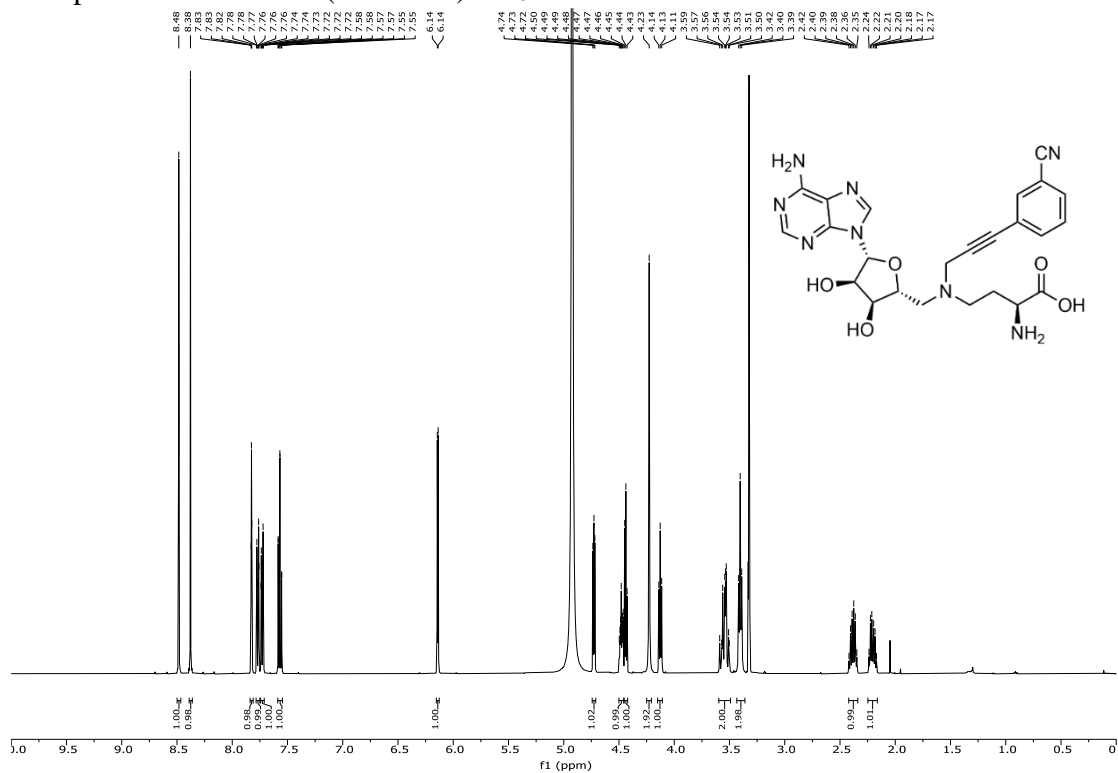

$^{13}\text{C}$  NMR (126 MHz)  $\text{CD}_3\text{OD}$

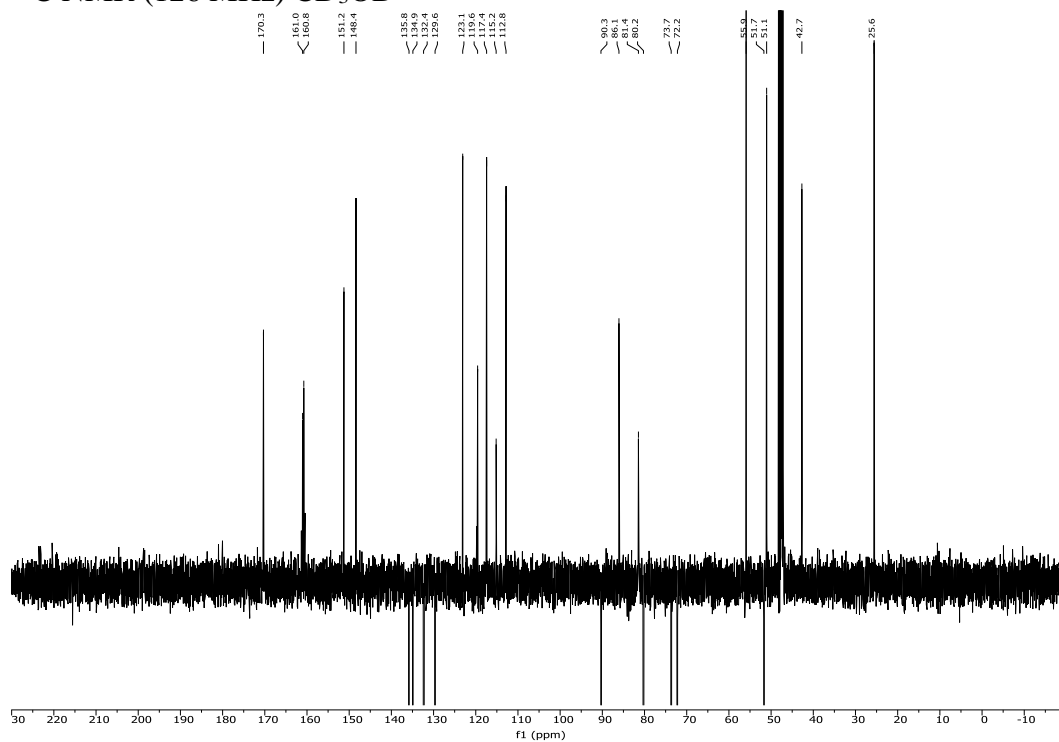

Compound **28a** <sup>1</sup>H NMR (500 MHz) CDCl<sub>3</sub>

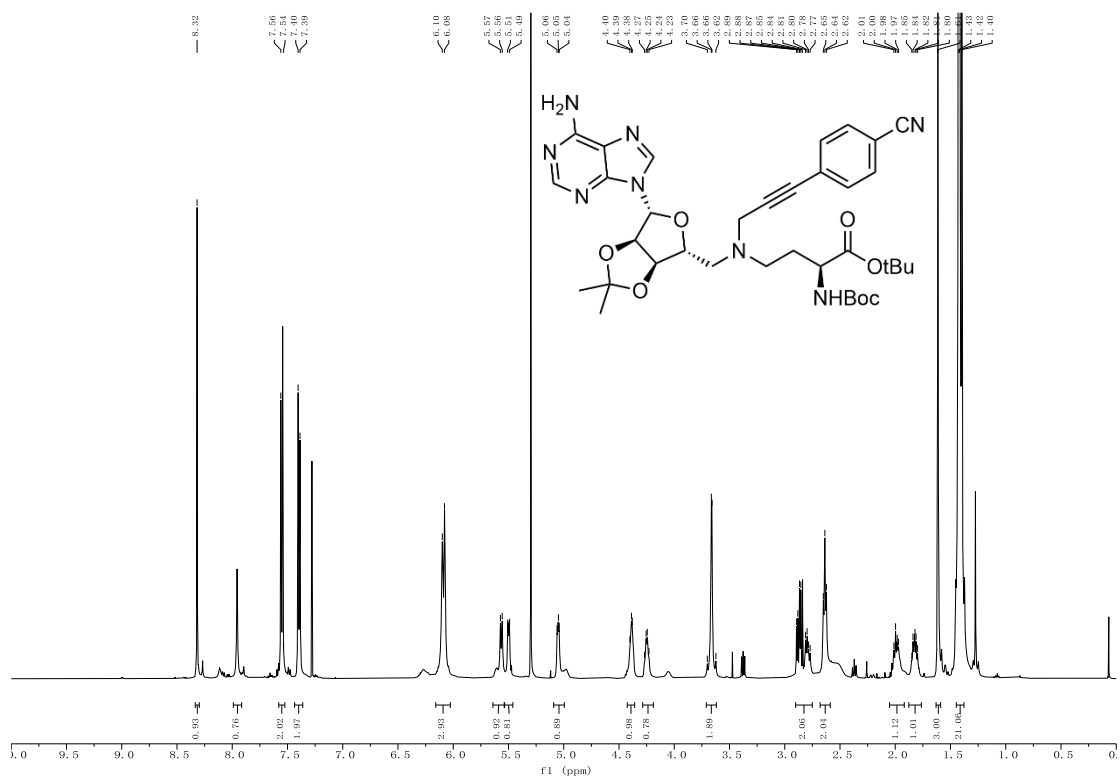

<sup>13</sup>C NMR (126 MHz) CDCl<sub>3</sub>

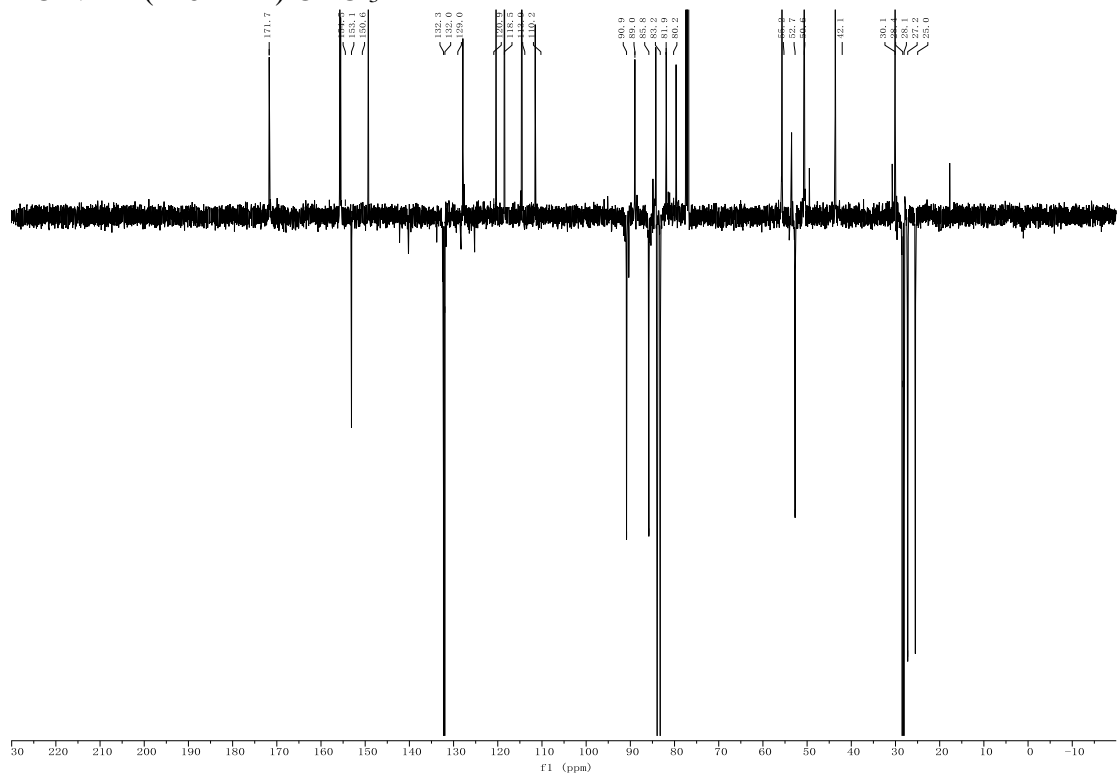

Compound **28** <sup>1</sup>H NMR (500 MHz) CD<sub>3</sub>OD

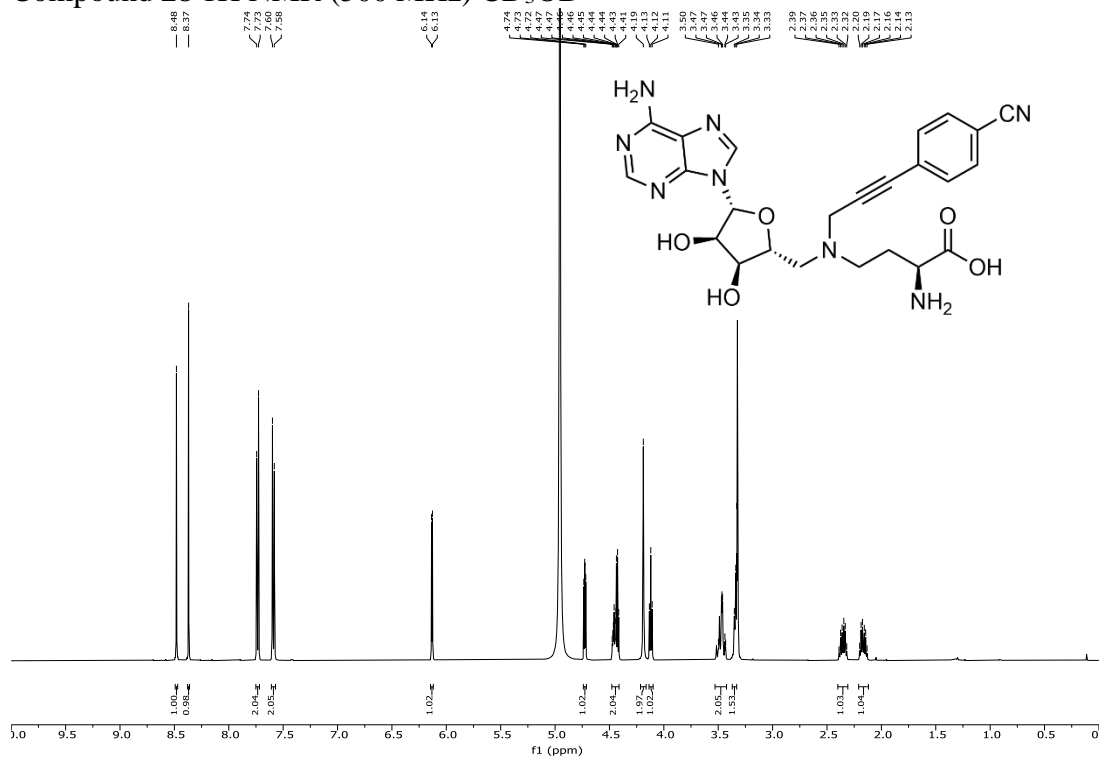

<sup>13</sup>C NMR (126 MHz) CD<sub>3</sub>OD

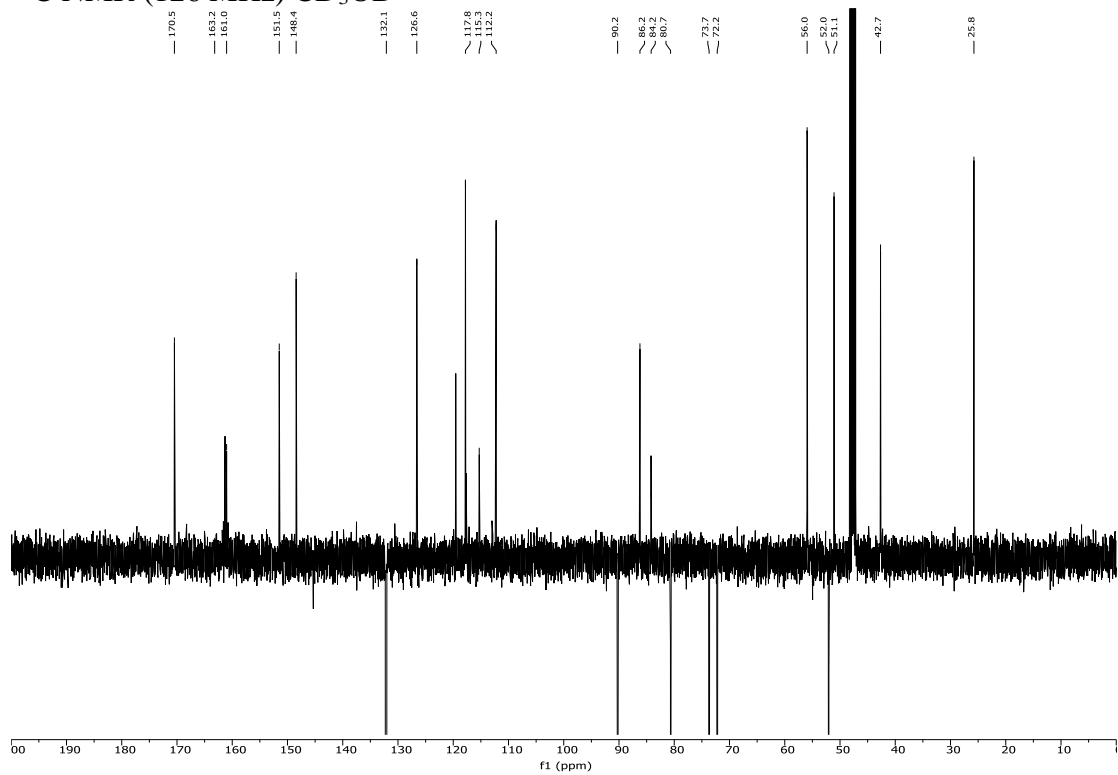

Compound **29a**  $^1\text{H}$  NMR (400 MHz)  $\text{CDCl}_3$

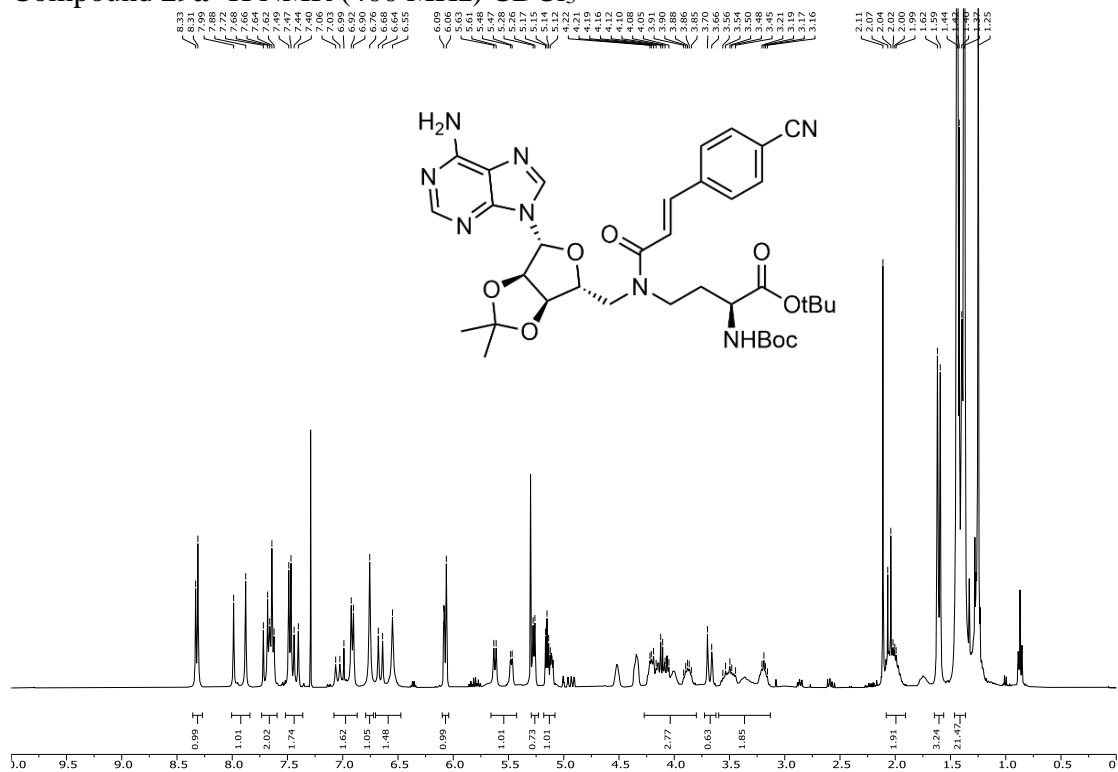

$^{13}\text{C}$  NMR (101 MHz)  $\text{CDCl}_3$

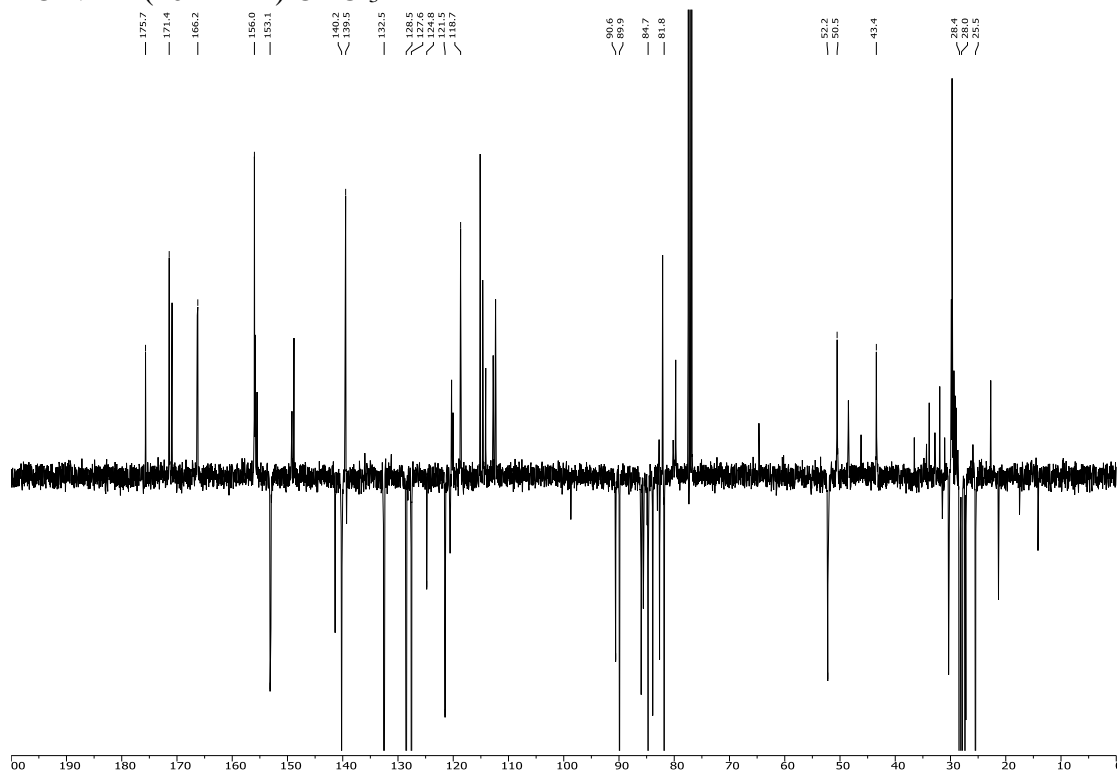



Compound **29**  $^1\text{H}$  NMR (400 MHz)  $\text{CD}_3\text{OD}$

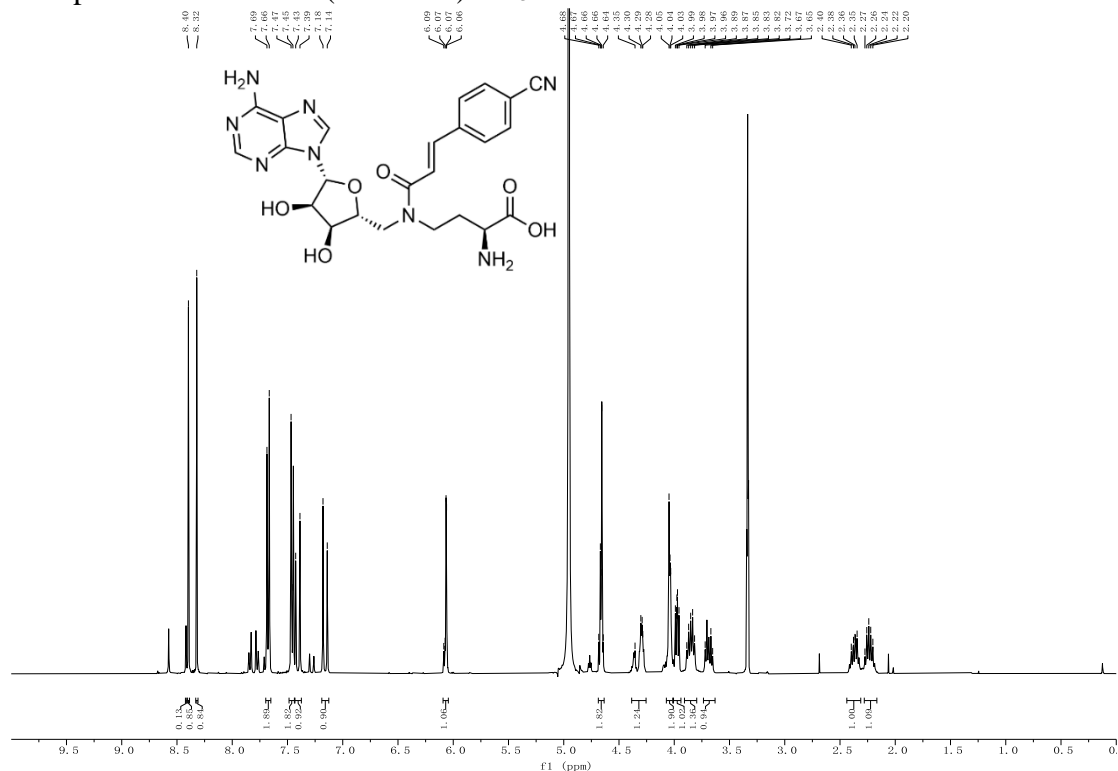

$^{13}\text{C}$  NMR (101 MHz)  $\text{CD}_3\text{OD}$

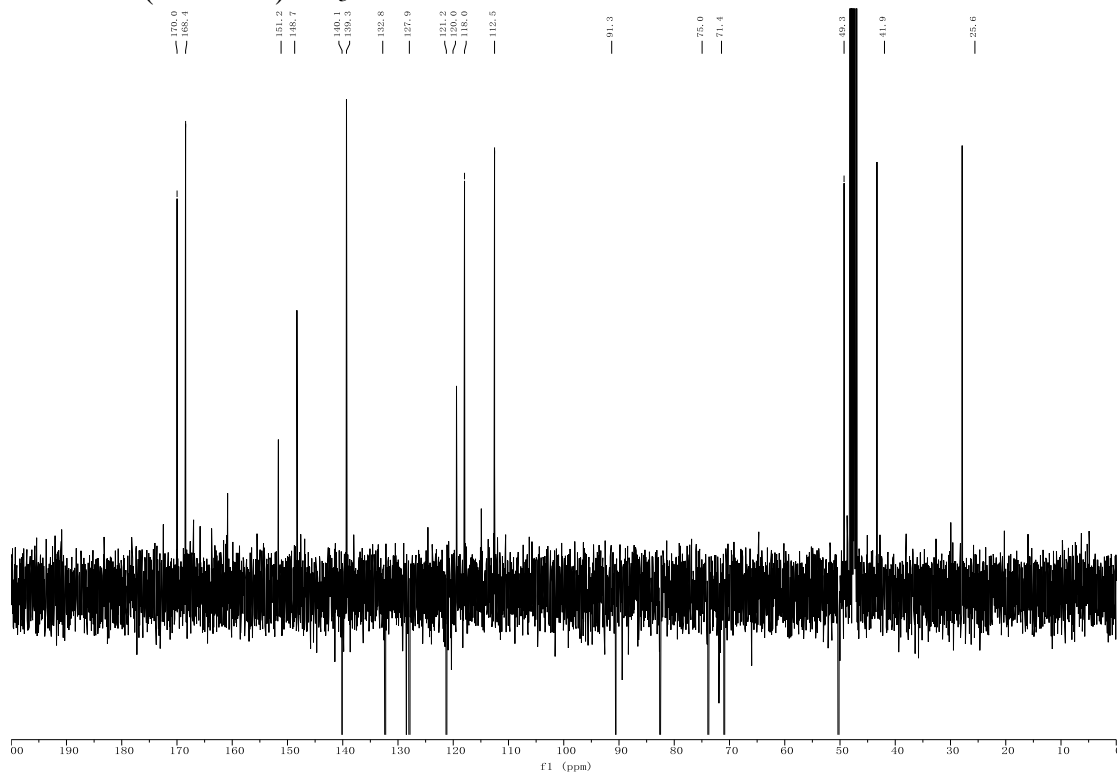

Compound **31a**  $^1\text{H}$  NMR (400 MHz)  $\text{CDCl}_3$

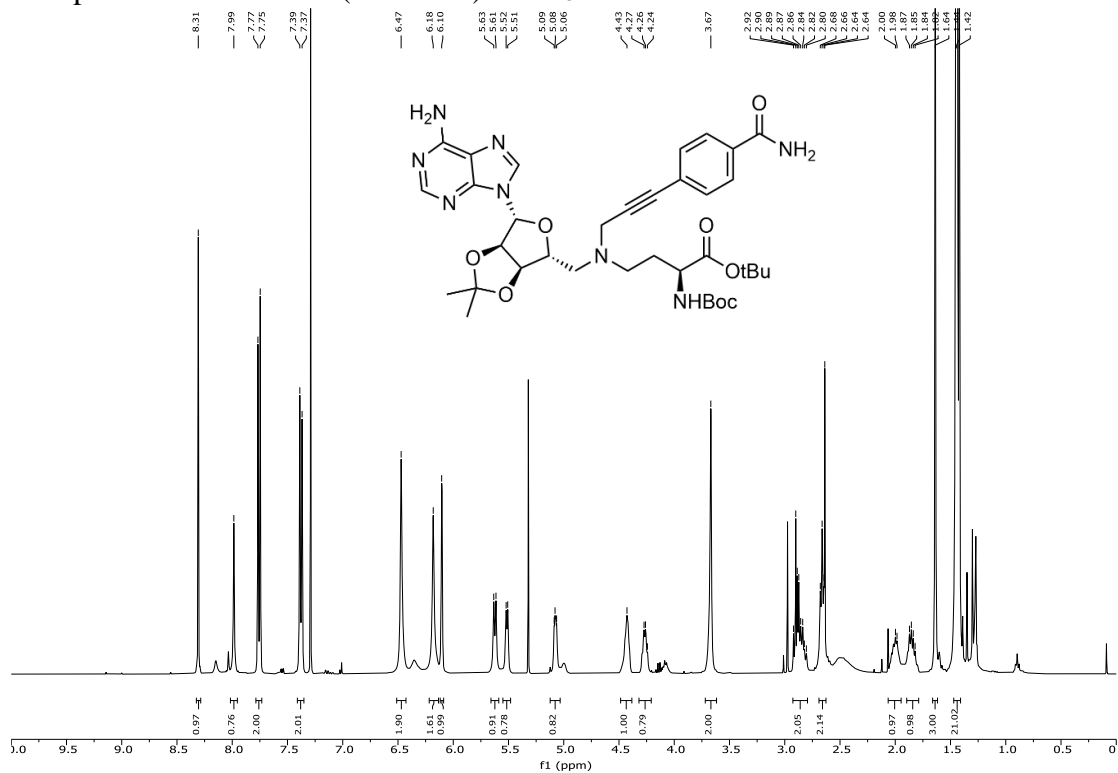

$^{13}\text{C}$  NMR (101 MHz)  $\text{CDCl}_3$

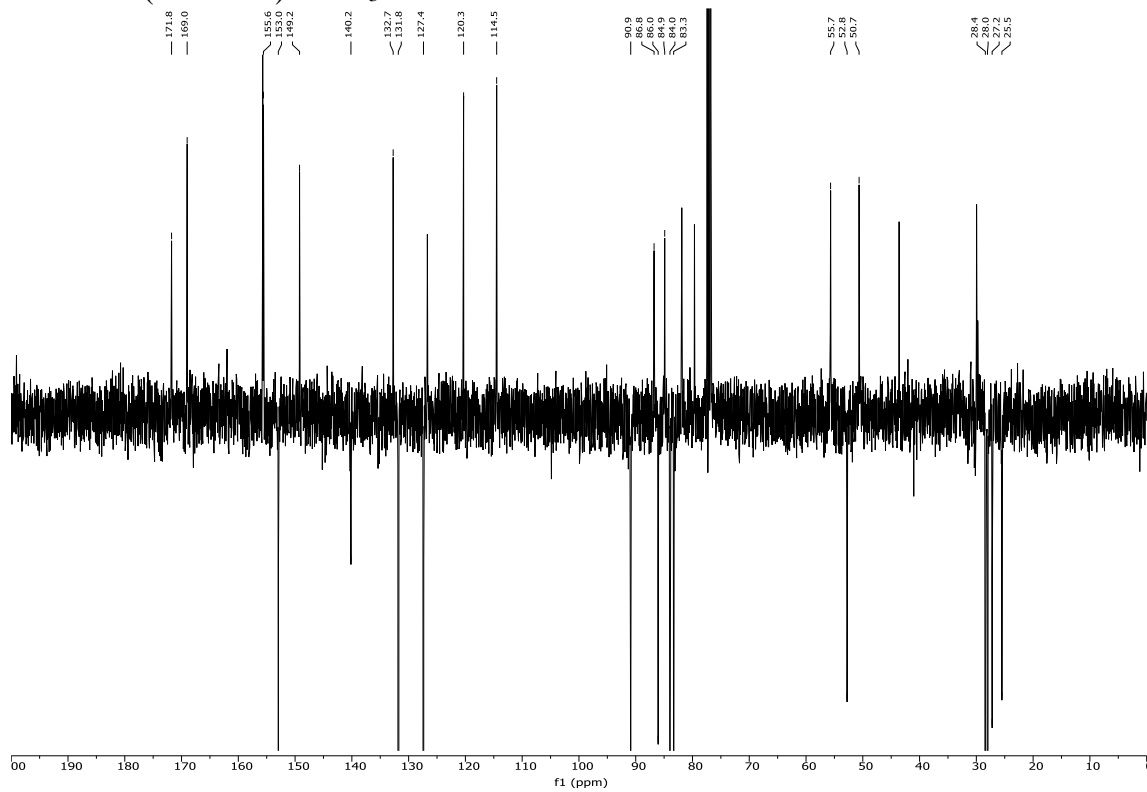

Compound **31**  $^1\text{H}$  NMR (400 MHz)  $\text{CD}_3\text{OD}$

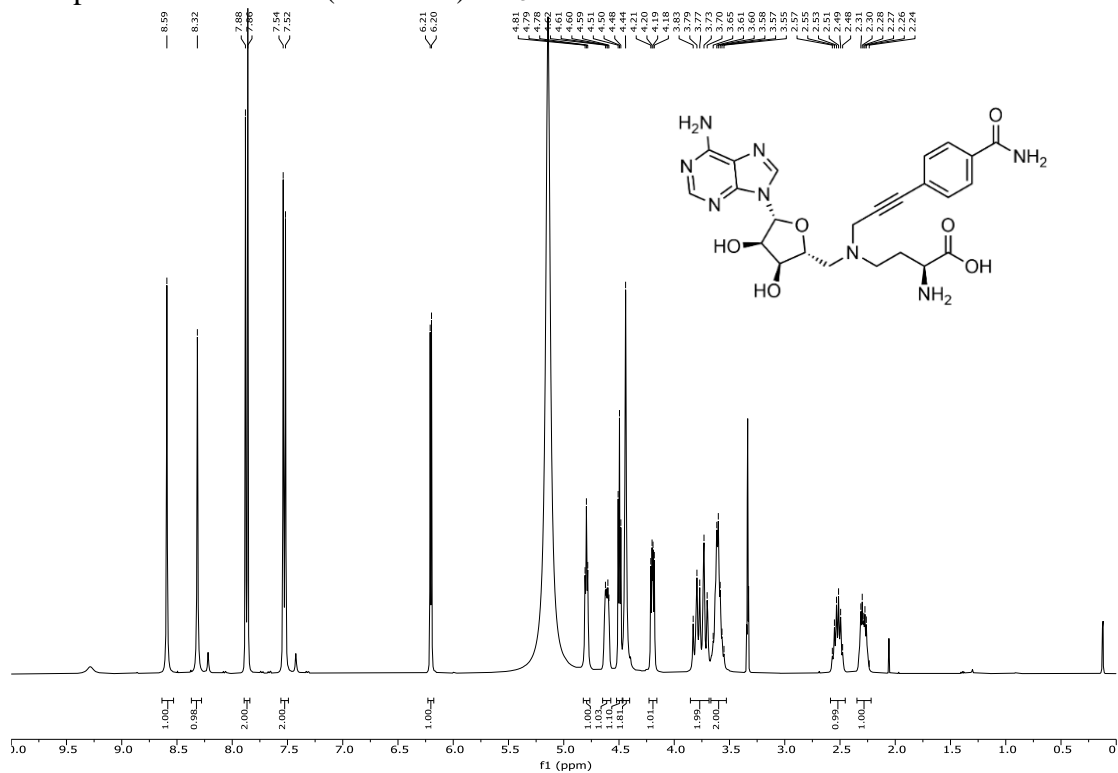

$^{13}\text{C}$  NMR (101 MHz)  $\text{CD}_3\text{OD}$

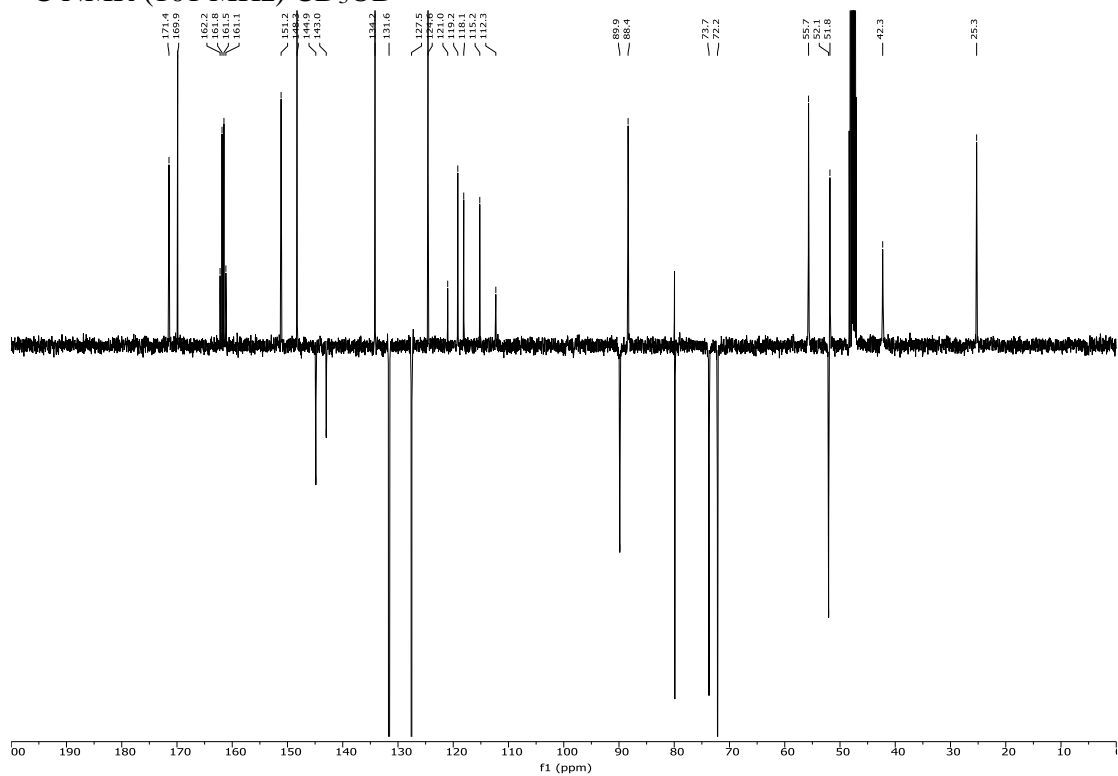

Supplement: jm1c01094_si_001.pdf [file jm1c01094_si_001.pdf]
